# Supplementary material
Source: MDPI journal article supplement (https://www.mdpi.com/2304-6740/5/1/13)
Supplement: s1 [file s1]

# Supplementary Materials: $K^+ \cdots C_\pi$ and $K^+ \cdots F$ Non-Covalent Interactions in $\pi$ -Functionalized Potassium Fluoroalkoxides

Sorin-Claudiu Roșca, Hanieh Roueindeji, Vincent Dorcet, Thierry Roisnel, Jean-François Carpentier \* and Yann Sarazin \*

## Table of contents

|                                                    |   |
|----------------------------------------------------|---|
| S1. Synthesis of $\{RO^4\}H$ .....                 | 2 |
| S2. $^1H$ NMR spectrum of $[\{RO^1\}K]_n$ .....    | 3 |
| S3. $^{19}F$ NMR spectrum of $[\{RO^1\}K]_n$ ..... | 3 |
| S4. $^1H$ NMR spectrum of $[\{RO^2\}K]_n$ .....    | 4 |
| S5. $^{19}F$ NMR spectrum of $[\{RO^2\}K]_n$ ..... | 4 |
| S6. $^1H$ NMR spectrum of $[\{RO^3\}K]_n$ .....    | 5 |
| S7. $^{19}F$ NMR spectrum of $[\{RO^3\}K]_n$ ..... | 5 |
| S8. $^1H$ NMR spectrum of $[\{RO^4\}K]_n$ .....    | 6 |
| S9. $^{19}F$ NMR spectrum of $[\{RO^4\}K]_n$ ..... | 6 |

## S1. Synthesis of {RO<sup>4</sup>}H

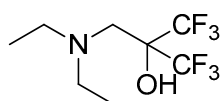

A solution of diethylamine (1.16 g, 15.86 mmol) was added via syringe to a solution of 2,2-bis(trifluoromethyl)oxirane (3.13 g, 17.38 mmol) in Et<sub>2</sub>O (10 mL). The reaction mixture was stirred at room temperature for 2 days. The volatiles were then evaporated under reduced pressure to afford {RO<sup>4</sup>}H as a colourless oil. Yield 3.55 g (89%). <sup>1</sup>H NMR ([D<sub>6</sub>]benzene, 400.13 MHz, 298 K): δ 6.67 (s, 1H, OH), 2.51 (s, 2H, CH<sub>2</sub>C(CF<sub>3</sub>)<sub>2</sub>), 2.09 (q, <sup>3</sup>J<sub>H-H</sub> = 7.2 Hz, 4H, NCH<sub>2</sub>CH<sub>3</sub>), 0.51 (t, <sup>3</sup>J<sub>H-H</sub> = 7.2 Hz, 6H, NCH<sub>2</sub>CH<sub>3</sub>) ppm. <sup>19</sup>F{<sup>1</sup>H} NMR (benzene-*d*<sub>6</sub>, 376.49 MHz, 298 K): δ -77.76 (s, 6F, CF<sub>3</sub>) ppm.

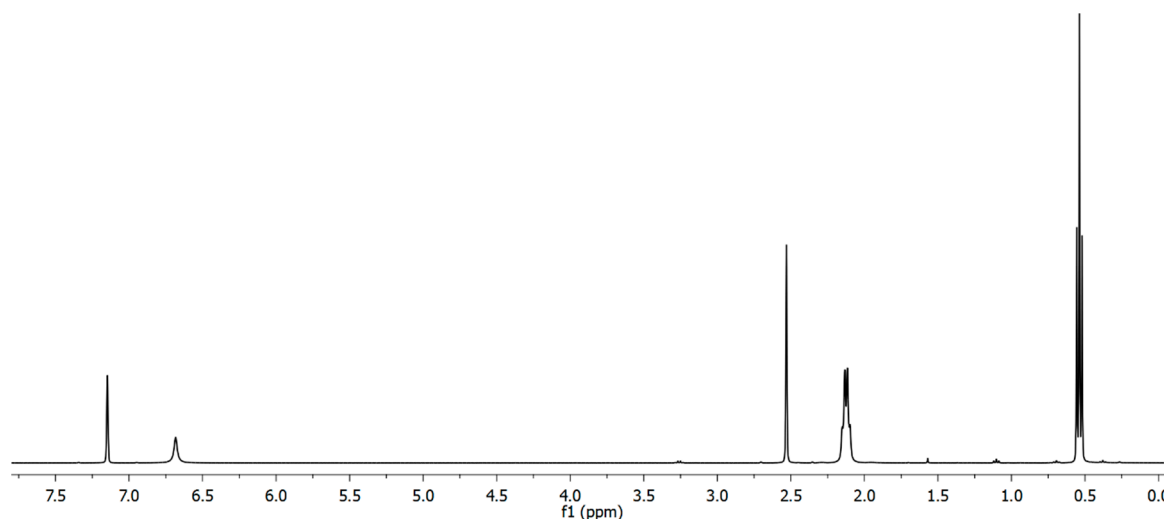

<sup>1</sup>H NMR spectrum (400.16 MHz, [D<sub>6</sub>]benzene, 298 K) of {RO<sup>4</sup>}H.

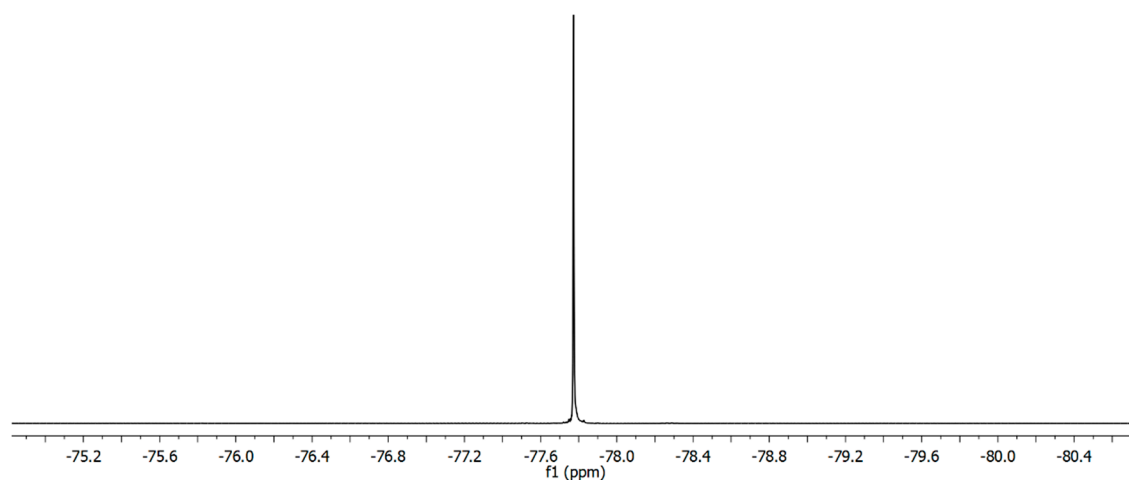

<sup>19</sup>F NMR spectrum (376.53 MHz, [D<sub>6</sub>]benzene, 298 K) of {RO<sup>4</sup>}H

**S2.  $^1\text{H}$  NMR spectrum of  $[\{\text{RO}^{13}\text{K}\}]_n$**

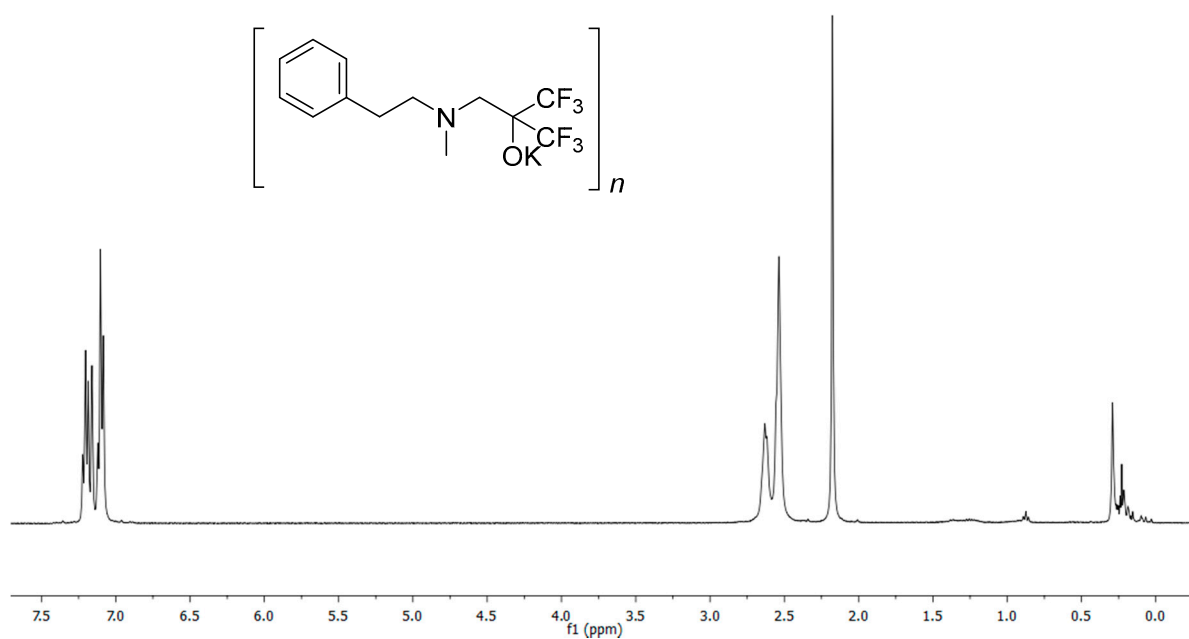

$^1\text{H}$  NMR spectrum (400.13 MHz,  $[\text{D}_6]\text{benzene}$ , 298 K) of  $[\mathbf{1}]_n$ .

**S3.  $^{19}\text{F}$  NMR spectrum of  $[\{\text{RO}^{13}\text{K}\}]_n$**

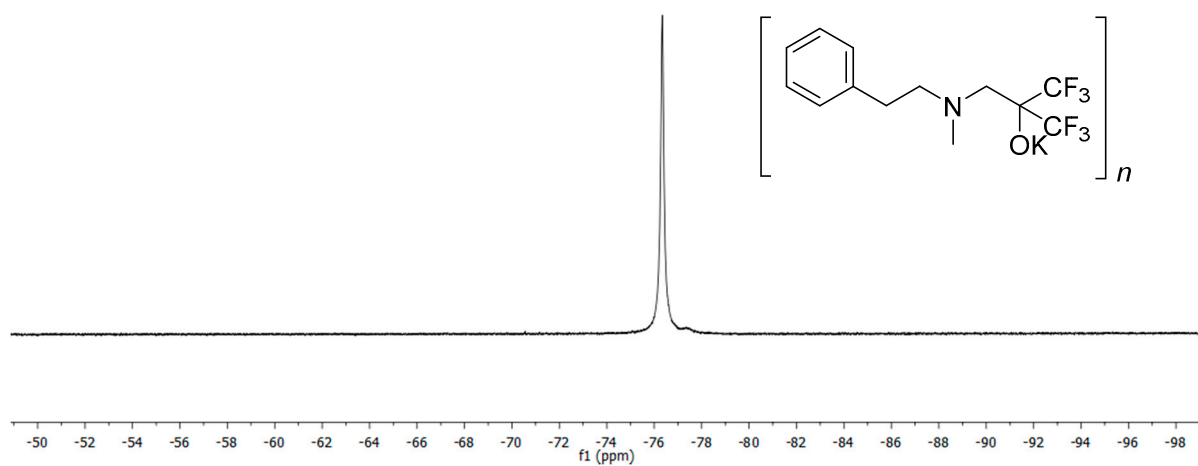

$^{19}\text{F}$  NMR spectrum (376.49 MHz,  $[\text{D}_6]\text{benzene}$ , 298 K) of  $[\mathbf{1}]_n$ .

**S4.  $^1\text{H}$  NMR spectrum of  $[\{\text{RO}^2\}\text{K}]_n$**

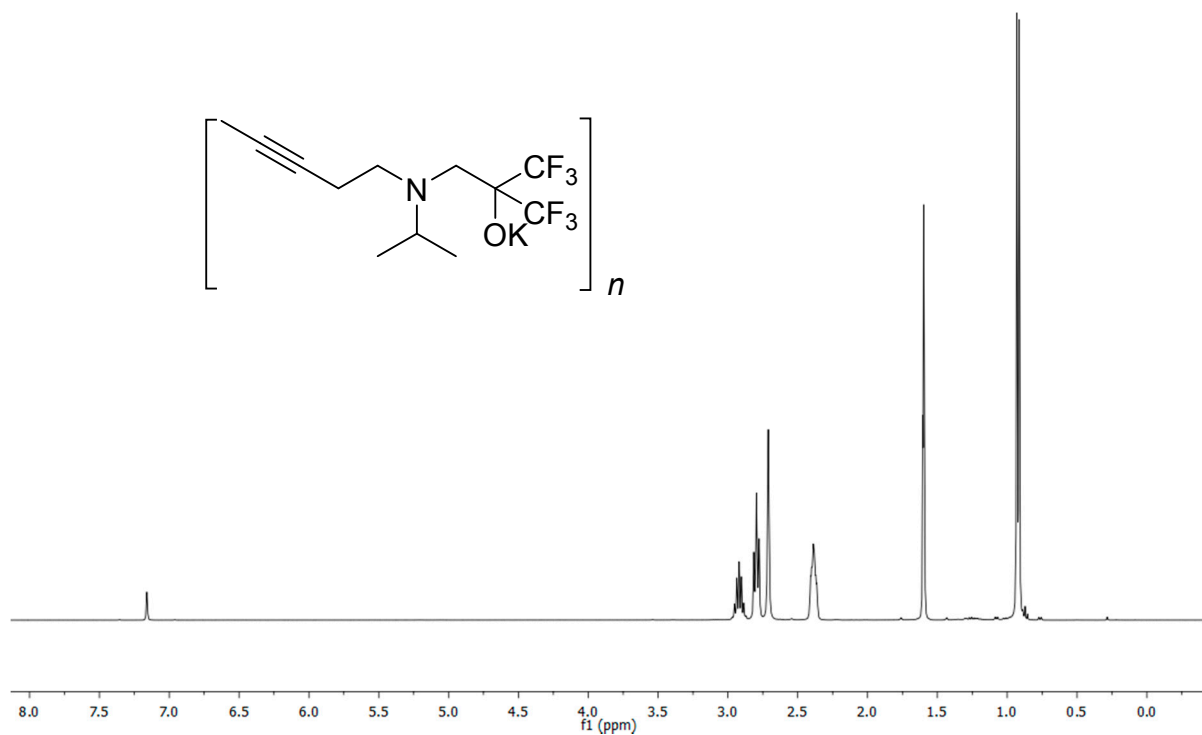

$^1\text{H}$  NMR spectrum (400.13 MHz,  $[\text{D}_6]$ benzene, 298 K) of  $[\mathbf{2}]_n$ .

**S5.  $^{19}\text{F}$  NMR spectrum of  $[\{\text{RO}^2\}\text{K}]_n$**

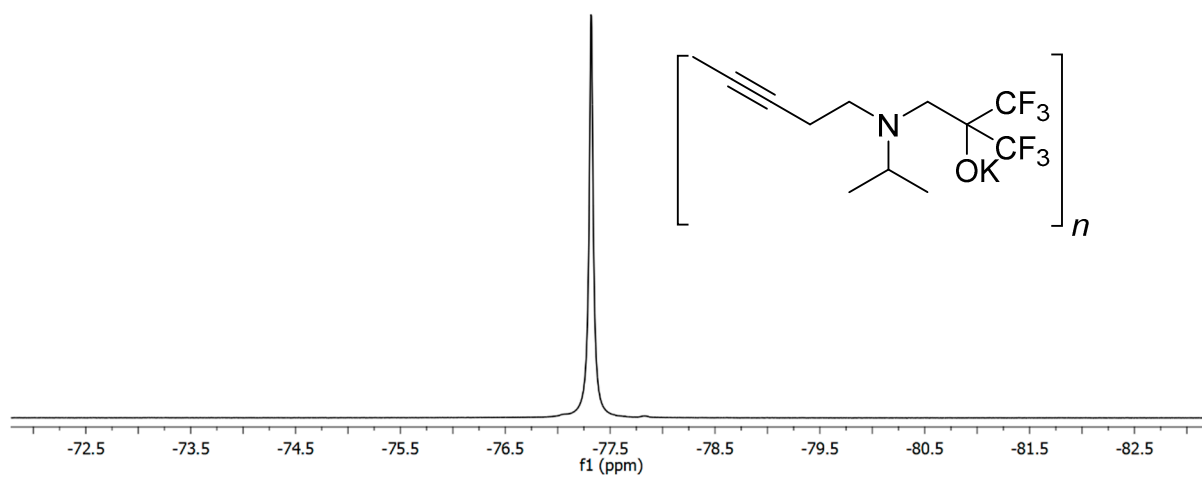

$^{19}\text{F}$  NMR spectrum (376.44 MHz,  $[\text{D}_6]$ benzene, 298 K) of  $[\mathbf{2}]_n$ .

**S6.  $^1\text{H}$  NMR spectrum of  $[\{\text{RO}^3\}\text{K}]_n$**

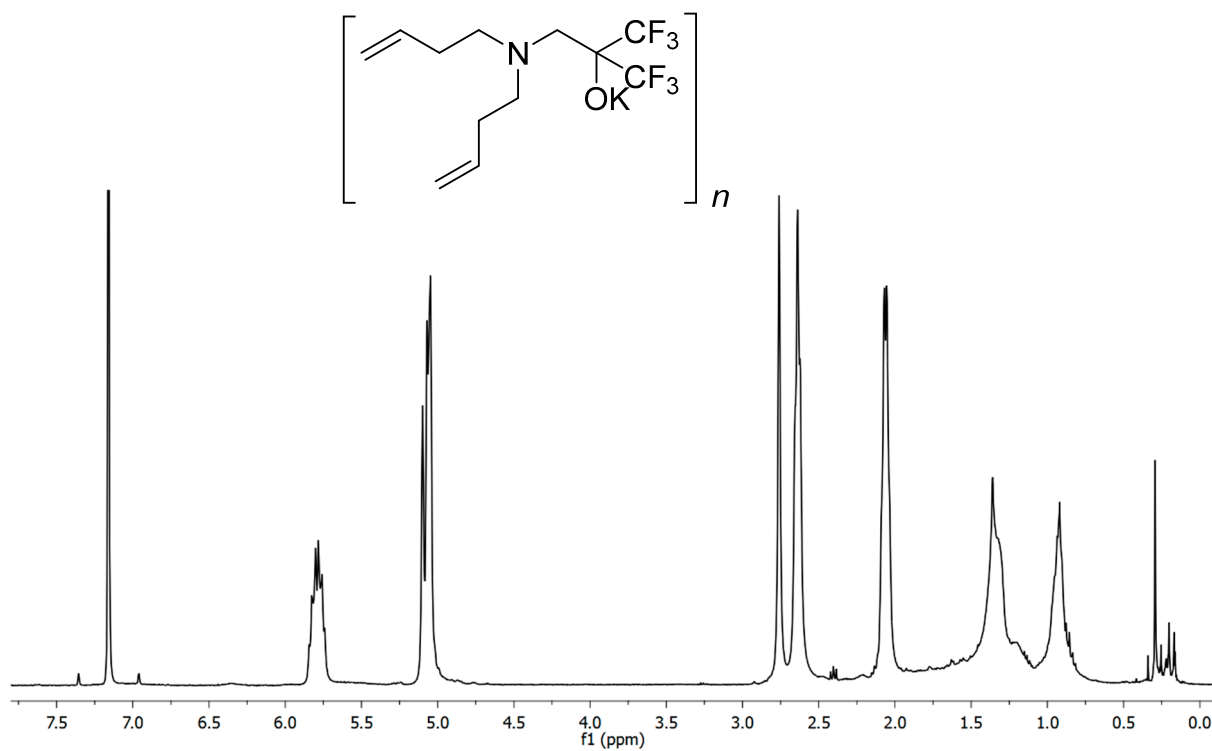

$^1\text{H}$  NMR spectrum (400.13 MHz,  $[\text{D}_6]\text{benzene}$ , 298 K) of  $[\mathbf{3}]_n$ .

**S7.  $^{19}\text{F}$  NMR spectrum of  $[\{\text{RO}^3\}\text{K}]_n$**

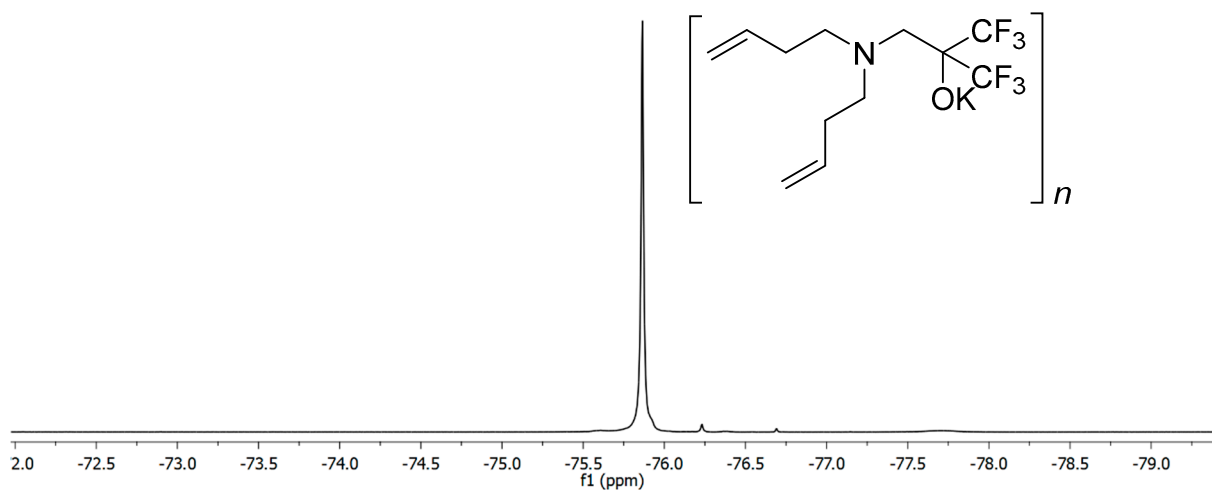

$^{19}\text{F}$  NMR spectrum (376.49 MHz,  $[\text{D}_6]\text{benzene}$ , 298 K) of  $[\mathbf{3}]_n$ .

**S8.  $^1\text{H}$  NMR spectrum of  $[(\text{RO}^4)\text{K}]_n$**

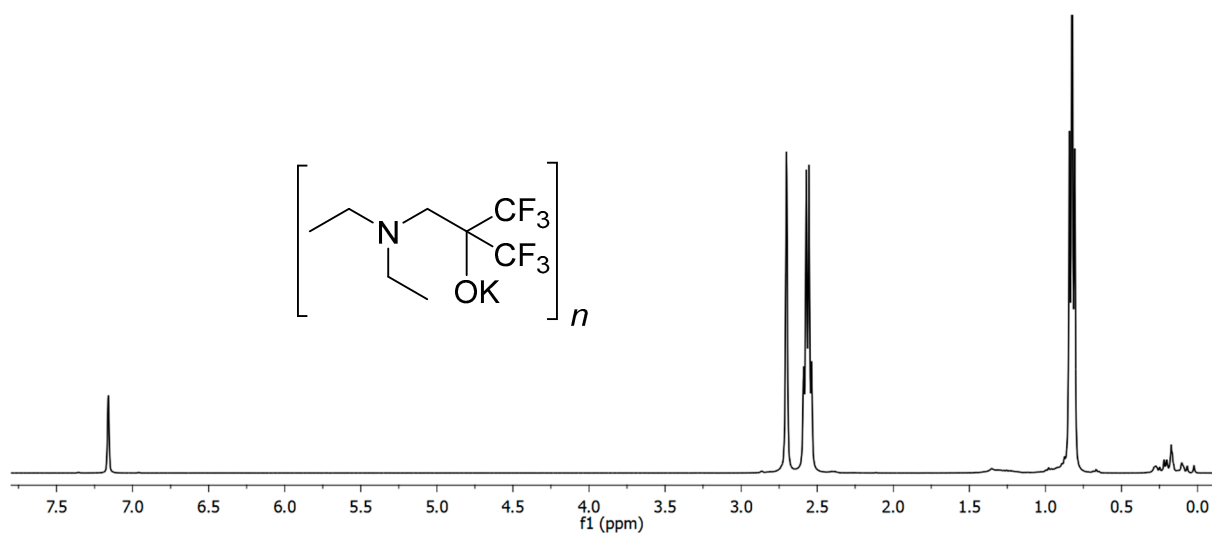

$^1\text{H}$  NMR spectrum (400.16 MHz,  $[\text{D}_6]$ benzene, 298 K) of  $[\mathbf{4}]_n$ .

**S9.  $^{19}\text{F}$  NMR spectrum of  $[(\text{RO}^4)\text{K}]_n$**

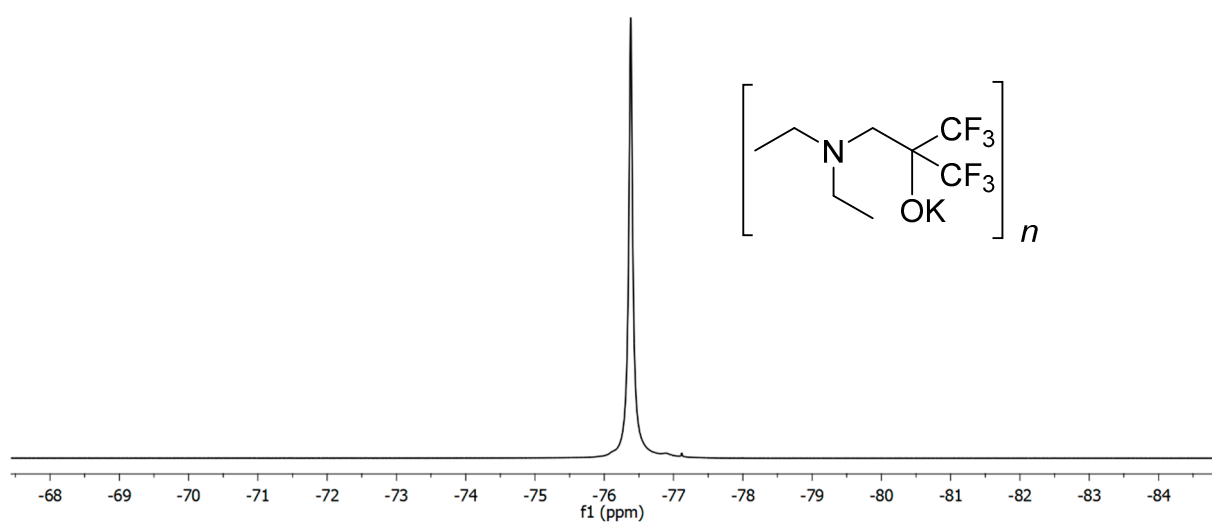

$^{19}\text{F}$  NMR spectrum (376.53  $[\text{D}_6]$ benzene, 298 K) of  $[\mathbf{4}]_n$ .
