# Supplementary material
Source: MDPI journal article supplement (https://www.mdpi.com/2304-6740/5/1/13)
Supplement: s1 [file s1]

Archive with 10 entries (9 files):
- inorganics-05-00013-supplementary/
- inorganics-05-00013-supplementary/Complex_1_SR556_checkcif.pdf
- inorganics-05-00013-supplementary/Complex_1_SR556_CIFfile.cif
- inorganics-05-00013-supplementary/Complex_2_SR629_checkcif.pdf
- inorganics-05-00013-supplementary/Complex_2_SR629_CIFfile.cif
- inorganics-05-00013-supplementary/Complex_3_SR437_checkCIF.pdf
- inorganics-05-00013-supplementary/Complex_3_SR437_CIFfile.cif
- inorganics-05-00013-supplementary/Complex_4_SR681_checkcif.pdf
- inorganics-05-00013-supplementary/Complex_4_SR681_CIFfile.cif
- inorganics-05-00013-supplementary/inorganics-05-00013-supplementary file.pdf
