# Supplementary material
Source: MDPI journal article supplement (https://www.mdpi.com/2304-6740/5/1/13)
Supplement: s1 [file s1 › inorganics-05-00013-supplementary/Complex_1_SR556_CIFfile.cif]

#\#CIF_1.1

#  CIF produced by WinGX routine CIF_UPDATE
#  Created on 2015-01-07 at 14:56:20
#  Using CIFtbx version 2.6.2 16 Jun 1998

#  Dictionary name : cif_core.dic
#  Dictionary vers : 2.4.3
#  Request file    : d:\progs\wingx\files\archive.dat
#  CIF files read  : sqz struct


#----------------------------------------------------------------------------#
#  CIF file completed and formatted by CRYSCALC (Dec. 2014)                  #
#  Date of diffraction experiment : 06jan15                                  #
#----------------------------------------------------------------------------#

#----------------------------------------------------------------------------#
#----------------------------------------------------------------------------#

data_SR556

_audit_creation_date                    2015-01-07T14:56:20-00:00
_audit_creation_method                  'WinGX routine CIF_UPDATE'
_audit_conform_dict_name                cif_core.dic
_audit_conform_dict_version             2.4.3
_audit_conform_dict_location            ftp://ftp.iucr.org/pub/cif_core.dic
_publ_requested_category                FM

#----------------------------------------------------------------------------#
#                   CHEMICAL INFORMATION                                     #
#----------------------------------------------------------------------------#

_chemical_name_systematic
;
 ?
;
_chemical_formula_moiety                'C104 H112 F48 K8 N8 O8'
_chemical_formula_sum                   'C104 H112 F48 K8 N8 O8'
_chemical_formula_weight                2826.82
_chemical_compound_source               'synthesis as described'

#----------------------------------------------------------------------------#
#                   UNIT CELL INFORMATION                                    #
#----------------------------------------------------------------------------#

_symmetry_cell_setting                  monoclinic
_symmetry_space_group_name_H-M          'P 21/n'
_symmetry_space_group_name_Hall         '-P 2yn'
_symmetry_Int_Tables_number             14
loop_
    _symmetry_equiv_pos_as_xyz
'x, y, z'
'-x+1/2, y+1/2, -z+1/2'
'-x, -y, -z'
'x-1/2, -y-1/2, z-1/2'

_cell_length_a                          14.2195(4)
_cell_length_b                          11.8504(4)
_cell_length_c                          39.8155(13)
_cell_angle_alpha                       90
_cell_angle_beta                        97.5260(10)
_cell_angle_gamma                       90
_cell_volume                            6651.4(4)
_cell_formula_units_Z                   2
_cell_measurement_temperature           150(2)
_cell_measurement_reflns_used           9234
_cell_measurement_theta_min             2.26
_cell_measurement_theta_max             24.56
_cell_measurement_wavelength            0.71073

#----------------------------------------------------------------------------#
#                   CRYSTAL INFORMATION                                      #
#----------------------------------------------------------------------------#

_exptl_crystal_description              prism
_exptl_crystal_colour                   colourless
_exptl_crystal_size_max                 0.51
_exptl_crystal_size_mid                 0.23
_exptl_crystal_size_min                 0.15
_exptl_crystal_density_diffrn           1.411
_exptl_crystal_density_method           'not measured'
_exptl_crystal_F_000                    2880
_exptl_special_details
;
 ?
;

#----------------------------------------------------------------------------#
#                   ABSORPTION CORRECTION                                    #
#----------------------------------------------------------------------------#

_exptl_absorpt_coefficient_mu                           0.378
_exptl_absorpt_correction_type                       multi-scan
_exptl_absorpt_process_details
;
  [Sheldrick, G.M. (2002). SADABS Bruker AXS Inc., Madison, Wisconsin, USA]
;
_exptl_absorpt_correction_T_min                         0.889
_exptl_absorpt_correction_T_max                         0.945


#----------------------------------------------------------------------------#
#                   SQUEEZE RESULTS                                          #
#----------------------------------------------------------------------------#

# Note: Data are Listed for all Voids in the P1 Unit Cell
# i.e. Centre of Gravity, Solvent Accessible Volume,
# Recovered number of Electrons in the Void and
# Details about the Squeezed Material
loop_
  _platon_squeeze_void_nr
  _platon_squeeze_void_average_x
  _platon_squeeze_void_average_y
  _platon_squeeze_void_average_z
  _platon_squeeze_void_volume
  _platon_squeeze_void_count_electrons
  _platon_squeeze_void_content
   1  0.250 -0.014  0.250       426        47 ' '
   2  0.750 -0.001  0.750       425        47 ' '
_platon_squeeze_details
;
;

#----------------------------------------------------------------------------#
#                   DATA COLLECTION                                          #
#----------------------------------------------------------------------------#

_diffrn_measurement_device_type         'APEXII, Bruker-AXS'
_diffrn_measurement_method              'CCD rotation images, thin slices'
_diffrn_detector                        'CCD plate'
_diffrn_ambient_temperature             150(2)
_diffrn_radiation_wavelength            0.71073
_diffrn_radiation_type                  MoK\a
_diffrn_radiation_monochromator         graphite
_diffrn_radiation_probe                 x-ray
_diffrn_reflns_av_R_equivalents         0.055
_diffrn_reflns_av_unetI/netI            0.0623
_diffrn_reflns_number                   59233
_diffrn_reflns_limit_h_min              -18
_diffrn_reflns_limit_h_max              18
_diffrn_reflns_limit_k_min              -15
_diffrn_reflns_limit_k_max              12
_diffrn_reflns_limit_l_min              -51
_diffrn_reflns_limit_l_max              51
_diffrn_reflns_theta_min                2.92
_diffrn_reflns_theta_max                27.48
_diffrn_reflns_theta_full               27.48
_diffrn_measured_fraction_theta_full
                                        0.998
_diffrn_measured_fraction_theta_max
                                        0.998
_reflns_number_total                    15220
_reflns_number_gt                       9649
_reflns_threshold_expression            >2sigma(I)

#----------------------------------------------------------------------------#
#                   COMPUTER PROGRAMS USED                                   #
#----------------------------------------------------------------------------#

_computing_data_collection              'Bruker APEX2 (Bruker, 2006)'
_computing_cell_refinement              'Bruker APEX2 (Bruker, 2006)'
_computing_data_reduction               'Bruker APEX2 (Bruker, 2006)'
_computing_structure_solution           'SIR97 (Altomare et al., 1999)'
_computing_structure_refinement         'SHELXL-97 (Sheldrick, 1997)'
_computing_molecular_graphics           'Ortep-3 for Windows (Farrugia, 1997)'
_computing_publication_material
;
          WinGX publication routines (Farrugia, 2012),
          CRYSCALc (T. Roisnel, local program, 2014)
;

#----------------------------------------------------------------------------#
#                   REFINEMENT INFORMATION                                   #
#----------------------------------------------------------------------------#

_refine_special_details
;
 Refinement of F^2^ against ALL reflections.  The weighted R-factor wR and
 goodness of fit S are based on F^2^, conventional R-factors R are based
 on F, with F set to zero for negative F^2^. The threshold expression of
 F^2^ > 2sigma(F^2^) is used only for calculating R-factors(gt) etc. and is
 not relevant to the choice of reflections for refinement.  R-factors based
 on F^2^ are statistically about twice as large as those based on F, and R-
 factors based on ALL data will be even larger.
;
_refine_ls_structure_factor_coef        Fsqd
_refine_ls_matrix_type                  full
_refine_ls_weighting_scheme             calc
_refine_ls_weighting_details
         'calc w=1/[\s^2^(Fo^2^)+(0.0536P)^2^+0.0000P] where P=(Fo^2^+2Fc^2^)/3'
_atom_sites_solution_primary            direct
_atom_sites_solution_secondary          difmap
_atom_sites_solution_hydrogens          geom
_refine_ls_hydrogen_treatment           constr
_refine_ls_extinction_method            none
_refine_ls_number_reflns                15220
_refine_ls_number_parameters            797
_refine_ls_number_restraints            0
_refine_ls_R_factor_all                 0.0797
_refine_ls_R_factor_gt                  0.0453
_refine_ls_wR_factor_ref                0.1185
_refine_ls_wR_factor_gt                 0.1054
_refine_ls_goodness_of_fit_ref          0.989
_refine_ls_restrained_S_all             0.989
_refine_ls_shift/su_max                 0.002
_refine_ls_shift/su_mean                0
_refine_diff_density_max                0.27
_refine_diff_density_min                -0.301
_refine_diff_density_rms                0.064

_iucr_refine_instructions_details
;
 .res SHELXL file: sqz.res
.................................................................
TITL import in P 21/n
CELL  0.71073  14.2195  11.8504  39.8155   90.000   97.526   90.000
ZERR     2.00   0.0004   0.0004   0.0013    0.000    0.001    0.000
LATT   1
SYMM  1/2 - X, 1/2 + Y, 1/2 - Z
SFAC  C    H    F    N    O    K
UNIT  208  224  96   16   16   16
MERG   2
FREE K1 C1
FREE K1 C2
FREE K3 C61
FREE K3 C62
FREE K3 C63
FREE K3 C64
FREE K3 C65
FREE K4 C91
FREE K4 C92
FREE K4 C93
FREE K4 C94
FREE K4 C95
FMAP   2
PLAN   20
ACTA
BOND   $H
CONF
LIST   4
WPDB  -2
L.S.   4
TEMP  -123.00
WGHT    0.053600
FVAR       2.20778
K1    6    0.348028    0.533338    0.646144    11.00000    0.04083    0.02657 =
         0.02605   -0.00176    0.00477   -0.00036
C1    1    0.324969    0.462724    0.727892    11.00000    0.11529    0.04714 =
         0.03582    0.01148    0.00977   -0.02294
AFIX  43
H1    2    0.352458    0.527418    0.739367    11.00000   -1.20000
AFIX   0
C2    1    0.383990    0.373486    0.719520    11.00000    0.07821    0.06228 =
         0.05574    0.02886    0.00642   -0.00752
AFIX  43
H2    2    0.450937    0.378474    0.724948    11.00000   -1.20000
AFIX   0
C3    1    0.343011    0.279471    0.703416    11.00000    0.08852    0.04786 =
         0.04311    0.01465    0.02010    0.00393
AFIX  43
H3    2    0.381818    0.218913    0.697771    11.00000   -1.20000
AFIX   0
C4    1    0.247027    0.272925    0.695540    11.00000    0.08779    0.04405 =
         0.03762   -0.00422    0.01751   -0.00055
AFIX  43
H4    2    0.219151    0.207608    0.684543    11.00000   -1.20000
AFIX   0
C5    1    0.190440    0.360136    0.703406    11.00000    0.07471    0.04178 =
         0.04640   -0.00070    0.02330   -0.00255
AFIX  43
H5    2    0.123635    0.354400    0.697648    11.00000   -1.20000
AFIX   0
C6    1    0.228546    0.456389    0.719559    11.00000    0.08906    0.03382 =
         0.03527    0.00427    0.02884   -0.00852
C7    1    0.165435    0.551118    0.728393    11.00000    0.12999    0.03891 =
         0.05220    0.00002    0.05460   -0.00864
AFIX  23
H7A   2    0.167541    0.553100    0.753338    11.00000   -1.20000
H7B   2    0.099437    0.533024    0.718732    11.00000   -1.20000
AFIX   0
C8    1    0.188815    0.669281    0.716446    11.00000    0.09598    0.03970 =
         0.03978   -0.00627    0.03268   -0.00732
AFIX  23
H8A   2    0.138577    0.721813    0.721674    11.00000   -1.20000
H8B   2    0.249209    0.694219    0.729563    11.00000   -1.20000
AFIX   0
N9    4    0.197622    0.678171    0.679870    11.00000    0.05231    0.03372 =
         0.03153   -0.00262    0.01914   -0.00641
C10   1    0.111059    0.641618    0.658993    11.00000    0.06934    0.04544 =
         0.05935   -0.01423    0.01134   -0.00649
AFIX 137
H10A  2    0.057529    0.687249    0.664374    11.00000   -1.50000
H10B  2    0.099195    0.561972    0.663561    11.00000   -1.50000
H10C  2    0.118268    0.651063    0.635011    11.00000   -1.50000
AFIX   0
C11   1    0.217921    0.795885    0.671990    11.00000    0.04879    0.03133 =
         0.04522    0.00047    0.01685    0.00064
AFIX  23
H11A  2    0.214609    0.841924    0.692550    11.00000   -1.20000
H11B  2    0.167425    0.822951    0.654340    11.00000   -1.20000
AFIX   0
C12   1    0.315496    0.817293    0.659524    11.00000    0.04032    0.02736 =
         0.02711   -0.00360    0.00994    0.00085
O13   5    0.333971    0.753213    0.633000    11.00000    0.04034    0.02733 =
         0.02373   -0.00674    0.00858    0.00257
C14   1    0.395241    0.802535    0.689172    11.00000    0.05522    0.03315 =
         0.03391   -0.00923    0.01068   -0.00094
F15   3    0.384447    0.861656    0.717155    11.00000    0.08703    0.06661 =
         0.03428   -0.02501    0.00144    0.01327
F16   3    0.481102    0.829457    0.680897    11.00000    0.04487    0.05906 =
         0.04819    0.00279    0.00116   -0.00918
F17   3    0.402761    0.694149    0.699373    11.00000    0.06336    0.04034 =
         0.03934    0.00629   -0.00177    0.00169
C18   1    0.312763    0.943229    0.649025    11.00000    0.04681    0.02719 =
         0.03969   -0.00492    0.01146    0.00095
F19   3    0.242918    0.962094    0.623686    11.00000    0.05102    0.04287 =
         0.05783    0.01451    0.01004    0.00687
F20   3    0.298681    1.016036    0.673847    11.00000    0.10407    0.02926 =
         0.06284   -0.01306    0.02876    0.00153
F21   3    0.392778    0.977267    0.637498    11.00000    0.05355    0.04066 =
         0.05711    0.00948    0.01346   -0.01102
K2    6    0.434185    0.492870    0.557491    11.00000    0.03292    0.02566 =
         0.02727   -0.00195    0.00643    0.00264
C31   1    0.027102    0.076759    0.653720    11.00000    0.07511    0.05808 =
         0.06519   -0.00673    0.01508    0.01874
AFIX  43
H31   2    0.082883    0.072973    0.642988    11.00000   -1.20000
AFIX   0
C32   1    0.026829    0.025918    0.684901    11.00000    0.12052    0.05925 =
         0.07966   -0.00268    0.00437    0.02011
AFIX  43
H32   2    0.081858   -0.012034    0.695355    11.00000   -1.20000
AFIX   0
C33   1   -0.053162    0.030364    0.700751    11.00000    0.12822    0.07919 =
         0.08192    0.01288    0.01488   -0.03563
AFIX  43
H33   2   -0.053811   -0.003309    0.722373    11.00000   -1.20000
AFIX   0
C34   1   -0.130561    0.083075    0.685222    11.00000    0.06996    0.13113 =
         0.08992    0.00076    0.02696   -0.04750
AFIX  43
H34   2   -0.186466    0.085063    0.695917    11.00000   -1.20000
AFIX   0
C35   1   -0.130742    0.134949    0.653761    11.00000    0.04456    0.08503 =
         0.08517    0.00559    0.01510   -0.01560
AFIX  43
H35   2   -0.186298    0.172004    0.643368    11.00000   -1.20000
AFIX   0
C36   1   -0.050760    0.132609    0.637750    11.00000    0.04075    0.03335 =
         0.06796   -0.00760    0.01085   -0.00875
C37   1   -0.046633    0.193872    0.604872    11.00000    0.03819    0.04221 =
         0.06073   -0.01003    0.00661   -0.00904
AFIX  23
H37A  2   -0.111800    0.212564    0.594412    11.00000   -1.20000
H37B  2   -0.017696    0.144180    0.589064    11.00000   -1.20000
AFIX   0
C38   1    0.011580    0.302394    0.610603    11.00000    0.03460    0.03731 =
         0.05117   -0.00925    0.01195   -0.00605
AFIX  23
H38A  2   -0.023116    0.356061    0.623547    11.00000   -1.20000
H38B  2    0.072506    0.284540    0.624619    11.00000   -1.20000
AFIX   0
N39   4    0.031506    0.357276    0.579519    11.00000    0.02679    0.03678 =
         0.04519   -0.00693    0.00687   -0.00313
C40   1   -0.053609    0.408460    0.561226    11.00000    0.03978    0.05866 =
         0.06785   -0.00047    0.00037    0.00029
AFIX 137
H40A  2   -0.102582    0.350557    0.556077    11.00000   -1.50000
H40B  2   -0.038330    0.441735    0.540067    11.00000   -1.50000
H40C  2   -0.077037    0.467440    0.575259    11.00000   -1.50000
AFIX   0
C41   1    0.109400    0.439803    0.586218    11.00000    0.03534    0.03059 =
         0.04292   -0.00817    0.01234   -0.00079
AFIX  23
H41A  2    0.123207    0.449233    0.611081    11.00000   -1.20000
H41B  2    0.085462    0.513235    0.576807    11.00000   -1.20000
AFIX   0
C42   1    0.205088    0.415848    0.572589    11.00000    0.02879    0.02361 =
         0.02897   -0.00463    0.00540   -0.00085
O43   5    0.264978    0.504176    0.580388    11.00000    0.03397    0.02129 =
         0.02978   -0.00391    0.00453   -0.00379
C44   1    0.251395    0.308403    0.588944    11.00000    0.03597    0.02503 =
         0.03394   -0.00458    0.00683   -0.00369
F45   3    0.270556    0.321301    0.622748    11.00000    0.06611    0.03675 =
         0.02973    0.00335   -0.00063   -0.00230
F46   3    0.200170    0.212502    0.584266    11.00000    0.04282    0.02170 =
         0.05705   -0.00234    0.00836   -0.00417
F47   3    0.335498    0.285375    0.578124    11.00000    0.03400    0.03262 =
         0.06149    0.00312    0.01218    0.00664
C48   1    0.187921    0.398164    0.533923    11.00000    0.03546    0.03588 =
         0.03474   -0.00421    0.00219   -0.00150
F49   3    0.135857    0.483602    0.518760    11.00000    0.06204    0.05062 =
         0.04276    0.00893   -0.00690    0.01067
F50   3    0.269784    0.398710    0.520088    11.00000    0.04592    0.06280 =
         0.03080   -0.01105    0.01055   -0.00847
F51   3    0.143844    0.302380    0.523436    11.00000    0.05297    0.04787 =
         0.03831   -0.01624   -0.00058   -0.01553
K3    6    0.250858    0.729961    0.570379    11.00000    0.02663    0.02533 =
         0.02709   -0.00122    0.00657    0.00199
C61   1    0.082594    0.941671    0.560984    11.00000    0.02902    0.03634 =
         0.05989   -0.01262    0.00713    0.00329
AFIX  43
H61   2    0.102399    1.011722    0.571154    11.00000   -1.20000
AFIX   0
C62   1    0.038066    0.863071    0.579548    11.00000    0.03273    0.04401 =
         0.06483   -0.01456    0.01481   -0.00104
AFIX  43
H62   2    0.027279    0.879777    0.602065    11.00000   -1.20000
AFIX   0
C63   1    0.009458    0.759991    0.564968    11.00000    0.02808    0.04223 =
         0.08032   -0.00605    0.01016   -0.00261
AFIX  43
H63   2   -0.020415    0.705565    0.577536    11.00000   -1.20000
AFIX   0
C64   1    0.024791    0.737135    0.531989    11.00000    0.02764    0.03195 =
         0.07395   -0.01492   -0.01049    0.00497
AFIX  43
H64   2    0.005415    0.666833    0.521895    11.00000   -1.20000
AFIX   0
C65   1    0.068332    0.816660    0.513722    11.00000    0.03378    0.04459 =
         0.04566   -0.00830   -0.00783    0.01636
AFIX  43
H65   2    0.077683    0.800431    0.491029    11.00000   -1.20000
AFIX   0
C66   1    0.098734    0.920058    0.527947    11.00000    0.02542    0.03725 =
         0.05024    0.00004   -0.00020    0.01176
C67   1    0.147270    1.007563    0.508546    11.00000    0.04206    0.04771 =
         0.05492    0.00655    0.00221    0.01817
AFIX  23
H67A  2    0.159349    1.075563    0.522907    11.00000   -1.20000
H67B  2    0.103561    1.029538    0.488172    11.00000   -1.20000
AFIX   0
C68   1    0.240166    0.969236    0.497533    11.00000    0.04796    0.03845 =
         0.04075    0.00966    0.00311    0.01055
AFIX  23
H68A  2    0.226308    0.911256    0.479669    11.00000   -1.20000
H68B  2    0.269607    1.034322    0.487320    11.00000   -1.20000
AFIX   0
N69   4    0.309014    0.922698    0.524515    11.00000    0.03540    0.02173 =
         0.03118    0.00007    0.00838    0.00549
C70   1    0.333736    1.005363    0.551582    11.00000    0.04697    0.03517 =
         0.04165   -0.01021    0.01401   -0.00137
AFIX 137
H70A  2    0.357309    1.074392    0.542005    11.00000   -1.50000
H70B  2    0.383087    0.974005    0.568499    11.00000   -1.50000
H70C  2    0.277354    1.023002    0.562353    11.00000   -1.50000
AFIX   0
C71   1    0.395931    0.886176    0.510869    11.00000    0.03741    0.02535 =
         0.03571    0.00096    0.01449    0.00294
AFIX  23
H71A  2    0.450962    0.926916    0.523013    11.00000   -1.20000
H71B  2    0.390716    0.907595    0.486663    11.00000   -1.20000
AFIX   0
C72   1    0.414715    0.756983    0.514111    11.00000    0.03015    0.02276 =
         0.02575    0.00040    0.00946    0.00321
O73   5    0.417928    0.716358    0.545963    11.00000    0.02896    0.02507 =
         0.02125    0.00016    0.00632    0.00284
C74   1    0.511704    0.737317    0.501360    11.00000    0.03598    0.02957 =
         0.03108    0.00130    0.01087    0.00157
F75   3    0.579656    0.801293    0.518544    11.00000    0.03242    0.04133 =
         0.05550   -0.00676    0.01156   -0.00365
F76   3    0.542160    0.629606    0.505747    11.00000    0.03822    0.03491 =
         0.04671   -0.00402    0.01397    0.01109
F77   3    0.513585    0.759620    0.468236    11.00000    0.05012    0.06169 =
         0.03486    0.00816    0.02347    0.00585
C78   1    0.340172    0.691727    0.489594    11.00000    0.03705    0.02592 =
         0.02539    0.00047    0.00632    0.00580
F79   3    0.255237    0.689364    0.501163    11.00000    0.02954    0.03938 =
         0.03649   -0.00381    0.00444   -0.00259
F80   3    0.323562    0.733585    0.458020    11.00000    0.05628    0.05154 =
         0.02461    0.00559    0.00147    0.00062
F81   3    0.364166    0.582286    0.486184    11.00000    0.04907    0.02761 =
         0.04550   -0.01184    0.00088    0.00564
K4    6    0.511639    0.764359    0.608636    11.00000    0.03175    0.02732 =
         0.03099   -0.00203    0.00420   -0.00027
C91   1    0.693035    0.906344    0.651209    11.00000    0.05277    0.05027 =
         0.04029   -0.00173    0.00573   -0.01516
AFIX  43
H91   2    0.713832    0.864770    0.671208    11.00000   -1.20000
AFIX   0
C92   1    0.621838    0.987181    0.651515    11.00000    0.06324    0.04911 =
         0.05326   -0.01451    0.02214   -0.01902
AFIX  43
H92   2    0.595561    1.000975    0.671870    11.00000   -1.20000
AFIX   0
C93   1    0.589198    1.047068    0.622851    11.00000    0.06217    0.03578 =
         0.07782    0.00139    0.01465   -0.00777
AFIX  43
H93   2    0.540644    1.101928    0.623257    11.00000   -1.20000
AFIX   0
C94   1    0.627533    1.026664    0.593714    11.00000    0.09480    0.05014 =
         0.06207    0.01631    0.00623   -0.01025
AFIX  43
H94   2    0.604878    1.066786    0.573619    11.00000   -1.20000
AFIX   0
C95   1    0.699435    0.947582    0.593331    11.00000    0.07847    0.05443 =
         0.04366    0.00273    0.02228   -0.01490
AFIX  43
H95   2    0.725861    0.935203    0.572929    11.00000   -1.20000
AFIX   0
C96   1    0.733646    0.886156    0.622045    11.00000    0.04471    0.04057 =
         0.04544   -0.00266    0.00959   -0.01811
C97   1    0.814197    0.803841    0.621501    11.00000    0.03993    0.06409 =
         0.06661   -0.00790    0.01084   -0.01218
AFIX  23
H97A  2    0.868193    0.829502    0.637971    11.00000   -1.20000
H97B  2    0.834995    0.805814    0.598732    11.00000   -1.20000
AFIX   0
C98   1    0.791403    0.682005    0.629735    11.00000    0.03124    0.06207 =
         0.05883   -0.00537    0.00016   -0.00099
AFIX  23
H98A  2    0.846512    0.634186    0.626399    11.00000   -1.20000
H98B  2    0.782674    0.677413    0.653961    11.00000   -1.20000
AFIX   0
N99   4    0.706362    0.635528    0.609306    11.00000    0.03194    0.03943 =
         0.05005   -0.00293    0.00434    0.00092
C100  1    0.716407    0.641062    0.573081    11.00000    0.06798    0.05675 =
         0.05364   -0.00795    0.00130    0.00848
AFIX 137
H10D  2    0.775202    0.603189    0.569091    11.00000   -1.50000
H10E  2    0.718511    0.720183    0.566057    11.00000   -1.50000
H10F  2    0.662208    0.603505    0.559933    11.00000   -1.50000
AFIX   0
C101  1    0.689503    0.518343    0.618620    11.00000    0.03275    0.04386 =
         0.06828   -0.00420    0.00421    0.00811
AFIX  23
H10G  2    0.743962    0.492552    0.634863    11.00000   -1.20000
H10H  2    0.687337    0.470856    0.598076    11.00000   -1.20000
AFIX   0
C102  1    0.596030    0.498579    0.634796    11.00000    0.03384    0.02979 =
         0.03790   -0.00050    0.00011    0.00877
O103  5    0.517751    0.546164    0.617808    11.00000    0.02895    0.03023 =
         0.03064   -0.00115   -0.00027    0.00649
C104  1    0.609808    0.542363    0.671524    11.00000    0.04629    0.04443 =
         0.04395   -0.00092   -0.01126    0.01002
F105  3    0.619274    0.654616    0.672403    11.00000    0.05633    0.04436 =
         0.05557   -0.01485    0.00645   -0.00436
F106  3    0.686176    0.500997    0.690719    11.00000    0.09189    0.09438 =
         0.06541   -0.02034   -0.04542    0.04656
F107  3    0.535089    0.519656    0.688125    11.00000    0.08534    0.05533 =
         0.03253    0.00026    0.01209   -0.00749
C108  1    0.582092    0.369661    0.635295    11.00000    0.04583    0.03517 =
         0.04747    0.00393    0.00312    0.00964
F109  3    0.656005    0.311413    0.651208    11.00000    0.06901    0.04218 =
         0.07779    0.01115   -0.00695    0.02163
F110  3    0.566848    0.328989    0.603291    11.00000    0.07049    0.03460 =
         0.04897   -0.00797    0.00651    0.00409
F111  3    0.505607    0.337864    0.649678    11.00000    0.06483    0.03703 =
         0.06024    0.00449    0.01478   -0.00371
HKLF    4
 
REM  import in P 21/n
REM R1 =  0.0453 for   9649 Fo > 4sig(Fo)  and  0.0797 for all  15220 data
REM    797 parameters refined using      0 restraints
 
END  
     
WGHT      0.0536      0.0000 
 REM Highest difference peak   0.27,  deepest hole  -0.30,  1-sigma level   0.06
Q1    1   0.2813  0.5655  0.7491  11.00000  0.05    0.27
Q2    1   0.6322  1.0063  0.7448  11.00000  0.05    0.25
Q3    1   0.3356  0.6802  0.6348  11.00000  0.05    0.24
Q4    1   0.7847  0.4132  0.7423  11.00000  0.05    0.24
Q5    1  -0.0606  0.5386  0.7388  11.00000  0.05    0.24
Q6    1   0.1980  0.4019  0.5544  11.00000  0.05    0.23
Q7    1  -0.0875  0.5635  0.7482  11.00000  0.05    0.23
Q8    1   0.6223  1.1877  0.5885  11.00000  0.05    0.23
Q9    1   0.2792  0.7415  0.6299  11.00000  0.05    0.23
Q10   1   0.1550  0.4124  0.5764  11.00000  0.05    0.23
Q11   1  -0.2789  0.1673  0.7503  11.00000  0.05    0.23
Q12   1   0.6749  0.8511  0.7503  11.00000  0.05    0.23
Q13   1   0.0650  0.3958  0.5822  11.00000  0.05    0.23
Q14   1  -0.0270  0.0205  0.7009  11.00000  0.05    0.23
Q15   1   0.0578  0.3174  0.5641  11.00000  0.05    0.23
Q16   1   0.8804  0.5640  0.7315  11.00000  0.05    0.23
Q17   1   0.3584  0.6656  0.7551  11.00000  0.05    0.23
Q18   1   0.6385  1.0447  0.6143  11.00000  0.05    0.23
Q19   1   0.3652  0.3624  0.6356  11.00000  0.05    0.22
Q20   1   0.6990  0.3086  0.7334  11.00000  0.05    0.22
;
# End of res file

_iucr_refine_reflections_details
;
 .hkl SHELXL file: job.hkl
.................................................................
   0   0  -2   30.11    1.98   0
   0   0   2   30.58    1.79   0
   0   0  -2   29.80    2.06   0
   0   0  -3    0.96    1.18   0
   0   0   3   -0.12    0.25   0
   0   0  -3    0.17    1.19   0
   0   0   3    0.27    0.84   0
   0   0   5   -0.26    0.79   0
   0   0  -5   -0.32    1.46   0
   0   0   5   -0.59    0.60   0
   0   0  -5    0.40    1.62   0
   0   0  -6  136.81    7.61   0
   0   0  -6  119.04    7.40   0
   0   0  -7   -0.10    1.89   0
   0   0  -7   -0.30    1.83   0
   0   0  -8   20.83    4.21   0
   0   0  -8   21.88    4.25   0
   0   0  -9   -2.12    1.77   0
   0   0  -9    0.40    2.12   0
   0   0 -10  152.74   10.45   0
   0   0 -10  158.43   10.53   0
   0   0 -11    2.08    3.00   0
   0   0 -11   -0.21    2.61   0
   0   0 -12  104.35   11.11   0
   0   0 -12   94.34   11.11   0
   0   0 -13    0.46    3.60   0
   0   0 -14    0.14    3.15   0
   0   0 -15   -2.78    3.31   0
   0   0 -16   -5.06    3.72   0
   0   0 -17   -2.22    3.77   0
   0   1   2 1752.13   58.87   0
   0   1   2 1714.40   58.78   0
   0  -1  -2 1786.43   58.96   0
   0  -1  -2 1780.55   59.06   0
   0   1   3   31.32    3.79   0
   0   1   3   31.94    3.85   0
   0  -1  -3   38.70    4.55   0
   0  -1  -3   31.96    4.22   0
   0   1   4   60.97    4.78   0
   0   1   4   61.88    4.97   0
   0  -1  -4   70.86    5.42   0
   0  -1  -4   65.37    5.43   0
   0   1  -5   39.58    2.57   0
   0   1   5   35.53    4.32   0
   0   1   5   47.80    5.16   0
   0   1  -5   37.47    2.60   0
   0  -1  -5   49.34    5.79   0
   0  -1  -5   32.83    4.74   0
   0   1   6    5.99    2.28   0
   0   1   6    5.97    2.33   0
   0   1  -6    5.54    1.69   0
   0   1  -6    4.07    1.50   0
   0  -1  -6    8.78    2.97   0
   0  -1  -6    5.07    2.85   0
   0   1  -7   33.99    3.87   0
   0   1   7   38.96    4.66   0
   0   1   7   32.19    4.34   0
   0   1  -7   31.41    3.66   0
   0  -1  -7   24.89    4.91   0
   0  -1  -7   30.76    5.31   0
   0   1   8   -0.86    1.37   0
   0   1   8    2.27    1.75   0
   0   1   8    2.27    1.68   0
   0   1  -8    1.22    1.67   0
   0   1  -8    0.99    1.64   0
   0  -1  -8    6.57    3.28   0
   0  -1  -8    3.11    2.82   0
   0   1  -9   72.81    5.83   0
   0   1  -9   75.63    6.01   0
   0   1   9   78.37    5.25   0
   0   1   9   60.87    4.64   0
   0  -1  -9   60.00    7.96   0
   0  -1  -9   84.76    9.34   0
   0   1  10    2.06    1.40   0
   0   1  10    3.00    1.35   0
   0   1 -10    1.55    2.33   0
   0   1 -10    5.39    2.70   0
   0  -1 -10    1.54    2.47   0
   0  -1 -10    6.42    3.56   0
   0   1 -11  111.07    8.46   0
   0   1 -11  100.86    7.94   0
   0  -1 -11  116.71   10.31   0
   0  -1 -11   99.52   11.49   0
   0   1 -12   44.50    6.60   0
   0   1 -12   32.91    5.64   0
   0  -1 -12   35.14    7.37   0
   0  -1 -12   35.99    7.54   0
   0   1 -13  165.23   11.63   0
   0  -1 -13  148.89   13.24   0
   0   1 -14   78.56    9.87   0
   0  -1 -14   74.68   11.45   0
   0   1 -15   30.85    6.70   0
   0  -1 -15   27.14    7.58   0
   0   1 -16   24.31    6.38   0
   0  -1 -16   30.38    8.47   0
   0   1 -17   -6.54    3.31   0
   0  -1 -17    5.50    5.75   0
   0   2   0  297.56   12.71   0
   0   2   0  284.54   12.58   0
   0  -2   0  306.95   12.66   0
   0  -2   0  286.01   12.49   0
   0   2  -1 2203.78   72.27   0
   0   2   1 2171.40   73.59   0
   0   2  -1 2160.45   72.32   0
   0   2   1 2151.55   73.54   0
   0  -2   1 2249.48   71.98   0
   0  -2   1 2100.48   71.84   0
   0  -2  -1 2194.05   73.49   0
   0  -2  -1 2214.15   73.66   0
   0   2  -2 1081.21   36.28   0
   0   2   2 1042.64   38.61   0
   0   2  -2 1132.19   36.41   0
   0   2   2 1038.65   38.58   0
   0  -2  -2 1045.95   38.63   0
   0  -2   2 1074.22   35.21   0
   0  -2  -2 1075.07   38.91   0
   0   2  -3    1.86    1.06   0
   0   2   3   -0.59    2.32   0
   0   2  -3    1.60    1.02   0
   0   2   3    2.87    2.08   0
   0  -2  -3   -0.87    1.89   0
   0  -2  -3   -1.52    1.94   0
   0   2   4  110.54    7.62   0
   0   2   4   99.90    7.44   0
   0  -2  -4   99.26    7.83   0
   0  -2  -4  101.47    7.70   0
   0   2   5    4.56    2.80   0
   0   2   5    3.01    2.40   0
   0  -2  -5   10.54    3.74   0
   0  -2  -5    1.30    2.39   0
   0   2  -6    4.39    1.06   0
   0   2   6    6.09    2.82   0
   0   2   6    5.46    2.86   0
   0   2  -6    4.52    0.99   0
   0  -2  -6    7.27    3.69   0
   0  -2  -6    4.65    2.94   0
   0   2  -7  144.81    6.36   0
   0   2   7  141.47    9.49   0
   0   2  -7  139.63    6.36   0
   0  -2  -7  160.11   10.93   0
   0  -2  -7  148.36   10.87   0
   0   2  -8   54.46    3.98   0
   0   2  -8   64.66    4.15   0
   0   2   8   57.83    7.17   0
   0  -2  -8   55.53    8.07   0
   0  -2  -8   66.62    8.86   0
   0   2   9    4.69    2.57   0
   0   2  -9    0.74    1.57   0
   0   2  -9   -0.60    1.39   0
   0  -2  -9    2.47    3.31   0
   0  -2  -9    4.11    3.48   0
   0   2 -10  101.21    6.66   0
   0   2 -10   97.82    6.63   0
   0   2  10   91.90    7.35   0
   0   2  10  101.18    7.59   0
   0  -2 -10   85.54   10.97   0
   0   2  11   21.26    4.13   0
   0   2 -11   20.16    3.92   0
   0   2 -11   17.23    3.81   0
   0  -2 -11   23.41    6.77   0
   0   2 -12    2.10    2.63   0
   0   2 -12   -2.23    2.01   0
   0  -2 -12    2.25    4.10   0
   0   2 -13    0.96    2.61   0
   0  -2 -13    2.32    4.24   0
   0   2 -14   46.12    7.13   0
   0  -2 -14   31.20    8.42   0
   0   2 -15   45.98    7.54   0
   0  -2 -15   41.12   10.06   0
   0   2 -16   -0.13    3.52   0
   0  -2 -16   -3.14    4.42   0
   0   3   0   -0.51    2.04   0
   0   3   0    2.24    2.40   0
   0  -3   0   -3.68    1.63   0
   0  -3   0    2.38    2.01   0
   0   3  -1  354.07   14.53   0
   0   3  -1  316.67   14.35   0
   0   3   1  324.31   15.38   0
   0   3   1  305.79   15.12   0
   0  -3  -1  291.49   14.73   0
   0  -3   1  329.27   13.91   0
   0  -3   1  332.00   13.89   0
   0  -3  -1  282.19   14.68   0
   0   3  -2   -0.47    1.56   0
   0   3   2    2.30    2.44   0
   0   3  -2    1.04    1.95   0
   0   3   2    1.28    2.56   0
   0  -3  -2    2.51    2.76   0
   0  -3   2    1.96    1.46   0
   0  -3   2   -1.52    1.32   0
   0  -3  -2   -2.10    2.01   0
   0   3   3   77.32    8.83   0
   0   3  -3   89.64    5.51   0
   0   3   3   84.17    7.43   0
   0   3  -3   88.49    5.60   0
   0  -3  -3   74.70    8.31   0
   0  -3  -3   71.83    8.20   0
   0   3   4  209.72   12.94   0
   0   3  -4  180.13    8.43   0
   0   3  -4  180.39    8.33   0
   0   3   4  167.02   11.13   0
   0  -3  -4  187.27   11.88   0
   0  -3  -4  182.45   11.91   0
   0   3  -5   32.33    2.87   0
   0   3  -5   32.89    2.98   0
   0   3   5   30.91    5.72   0
   0  -3  -5   27.15    5.94   0
   0  -3  -5   34.27    6.35   0
   0   3   6    1.91    2.93   0
   0   3  -6    1.04    1.12   0
   0   3  -6    2.33    1.31   0
   0  -3  -6    0.66    2.71   0
   0   3  -7   20.16    2.49   0
   0   3  -7   21.91    2.53   0
   0   3   7   16.47    4.55   0
   0  -3  -7   16.95    5.49   0
   0   3  -8   45.94    3.56   0
   0   3  -8   48.96    3.58   0
   0   3   8   49.87    7.60   0
   0  -3  -8   44.01    8.02   0
   0   3   9   61.06    8.42   0
   0   3  -9   50.32    4.01   0
   0   3  -9   54.36    4.05   0
   0  -3  -9   43.02    8.53   0
   0   3  10   14.96    4.63   0
   0   3 -10   12.77    2.71   0
   0   3 -10   15.33    2.69   0
   0  -3 -10   12.56    5.50   0
   0   3 -11   44.22    5.03   0
   0   3  11   33.99    6.17   0
   0   3 -11   36.20    4.79   0
   0   3  11   49.85    7.54   0
   0  -3 -11   40.38    8.89   0
   0   3 -12    6.61    2.55   0
   0  -3 -12    0.88    3.97   0
   0   3 -13   22.89    4.48   0
   0  -3 -13   15.96    6.98   0
   0   3 -14    3.75    3.05   0
   0  -3 -14    5.63    5.79   0
   0   3 -15    3.12    3.05   0
   0  -3 -15    0.51    4.43   0
   0  -3 -16    3.28    6.21   0
   0   4   0 1069.13   40.20   0
   0   4   0 1060.22   40.43   0
   0  -4   0 1044.14   39.83   0
   0  -4   0 1032.69   39.45   0
   0   4   1  173.89   11.10   0
   0   4  -1  158.12   10.06   0
   0   4  -1  160.56   10.30   0
   0   4   1  158.69   10.80   0
   0  -4   1  153.08    9.22   0
   0  -4  -1  174.93   10.88   0
   0  -4  -1  180.71   11.23   0
   0  -4   1  146.41    9.35   0
   0   4  -2  179.11   10.38   0
   0   4   2  184.85   12.33   0
   0   4   2  196.96   12.38   0
   0   4  -2  184.18   10.73   0
   0  -4   2  190.72    9.61   0
   0  -4  -2  200.41   12.41   0
   0  -4   2  169.20    9.42   0
   0   4  -3   79.12    6.40   0
   0   4  -3   65.40    5.71   0
   0   4   3   64.80    8.28   0
   0  -4  -3   81.16    9.99   0
   0  -4   3   68.42    4.61   0
   0  -4   3   75.02    4.58   0
   0   4  -4    8.05    2.72   0
   0   4  -4    9.85    2.75   0
   0   4   4    6.62    3.70   0
   0  -4  -4    6.47    3.80   0
   0   4   5   -3.88    2.32   0
   0   4  -5    2.99    1.97   0
   0   4  -5   -1.51    1.54   0
   0  -4  -5    2.80    3.50   0
   0   4  -6    0.46    1.51   0
   0   4   6    0.33    2.78   0
   0   4  -6   -2.12    1.23   0
   0  -4  -6    3.68    3.42   0
   0   4  -7   19.15    3.12   0
   0   4  -7   16.53    3.07   0
   0   4   7   19.68    5.71   0
   0  -4  -7    9.51    4.56   0
   0   4  -8    9.12    2.31   0
   0   4  -8    5.12    2.10   0
   0   4   8    1.73    3.40   0
   0   4  -8    4.18    1.79   0
   0  -4  -8    6.05    4.68   0
   0   4  -9   -0.81    1.38   0
   0   4   9   -3.45    2.34   0
   0   4  -9   -0.15    1.34   0
   0  -4  -9    2.72    3.73   0
   0   4 -10   86.82    5.86   0
   0   4 -10   80.98    5.73   0
   0   4  10   98.39   12.00   0
   0  -4 -10   74.12   11.68   0
   0   4 -11    0.93    1.82   0
   0   4 -11    1.10    1.91   0
   0   4  11   -0.29    3.16   0
   0  -4 -11    1.57    4.26   0
   0   4  12    0.45    3.30   0
   0   4 -12   -1.39    2.01   0
   0   4  12    0.88    2.80   0
   0  -4 -12    1.98    4.73   0
   0   4 -13    1.16    2.45   0
   0  -4 -13    0.33    4.45   0
   0   4 -14   17.02    3.87   0
   0  -4 -14    9.95    6.28   0
   0  -4 -15    8.33    6.79   0
   0  -4 -16   27.20   10.68   0
   0   5   0   -2.77    2.08   0
   0   5   0   -0.66    2.66   0
   0  -5   0    0.93    2.37   0
   0   5   1  333.06   18.40   0
   0   5  -1  335.81   17.50   0
   0   5  -1  334.71   17.35   0
   0  -5  -1  333.25   17.71   0
   0  -5   1  290.39   15.71   0
   0   5  -2   25.05    5.40   0
   0   5   2   29.77    6.01   0
   0   5  -2   35.44    6.06   0
   0  -5   2   30.68    4.99   0
   0  -5  -2   25.40    6.16   0
   0   5  -3   70.41    8.04   0
   0   5   3   82.94   10.51   0
   0   5  -3   87.66    7.70   0
   0  -5   3   77.76    5.57   0
   0  -5  -3   92.27   11.10   0
   0  -5   3   77.08    5.78   0
   0   5  -4    9.33    3.30   0
   0   5   4   13.48    5.11   0
   0   5  -4   14.21    3.80   0
   0  -5   4   10.80    1.60   0
   0  -5  -4    8.59    4.59   0
   0  -5   4   13.51    1.79   0
   0   5   5   64.49    9.56   0
   0   5  -5   68.43    6.16   0
   0   5  -5   72.72    6.53   0
   0  -5  -5   81.70   11.65   0
   0   5   6   12.02    5.22   0
   0   5  -6   31.73    4.95   0
   0   5  -6   30.60    4.74   0
   0  -5  -6   19.24    6.32   0
   0   5  -7    5.45    2.46   0
   0   5   7    8.84    4.71   0
   0   5  -7    7.31    2.74   0
   0  -5  -7   11.15    5.04   0
   0   5  -8   39.33    5.22   0
   0   5   8   43.70    8.81   0
   0   5  -8   46.67    5.72   0
   0  -5  -8   28.48    7.63   0
   0   5  -9  234.24   11.62   0
   0   5  -9  229.72   11.58   0
   0   5  -9  208.59   11.23   0
   0   5   9  236.97   16.88   0
   0  -5  -9  205.55   17.15   0
   0   5 -10   -1.20    1.83   0
   0   5  10    3.75    4.27   0
   0   5 -10    0.50    1.87   0
   0  -5 -10   -0.63    3.88   0
   0   5 -11    4.86    2.51   0
   0   5  11    2.54    4.74   0
   0  -5 -11    2.42    4.74   0
   0   5  12   78.80   11.81   0
   0   5  12   68.93   11.28   0
   0   5 -12   71.29    7.27   0
   0  -5 -12   82.39   14.84   0
   0   5 -13    0.04    2.29   0
   0  -5 -13   -2.24    4.39   0
   0  -5 -14   -4.83    4.36   0
   0  -5 -15   -1.77    5.85   0
   0   6   0   13.53    4.90   0
   0  -6   0   24.52    5.84   0
   0   6  -1  119.65   10.64   0
   0   6   1  145.17   12.07   0
   0  -6   1  147.87   10.66   0
   0  -6  -1  148.84   11.91   0
   0   6  -2   39.82    7.37   0
   0   6  -2   22.67    5.81   0
   0   6   2   23.46    6.45   0
   0  -6   2   29.39    5.27   0
   0  -6  -2   23.61    6.30   0
   0   6   3   57.26    9.64   0
   0   6  -3   32.90    6.32   0
   0   6  -3   22.96    5.51   0
   0  -6   3   38.36    5.25   0
   0  -6  -3   45.36    8.59   0
   0   6  -4   35.29    6.34   0
   0   6   4   32.96    7.71   0
   0   6  -4   26.65    5.69   0
   0  -6   4   27.58    3.59   0
   0  -6  -4   28.17    7.39   0
   0   6  -5    0.85    2.63   0
   0   6   5    6.72    4.24   0
   0   6  -5    2.56    2.82   0
   0  -6  -5    2.38    4.19   0
   0   6  -6   19.87    4.65   0
   0   6   6   30.09    7.63   0
   0   6  -6   37.54    6.22   0
   0  -6  -6   37.44    9.01   0
   0   6  -7  122.56    9.40   0
   0   6   7  131.42   15.65   0
   0   6  -7  132.62    9.57   0
   0  -6  -7  164.75   18.81   0
   0   6  -8   41.26    6.18   0
   0   6   8   19.42    6.77   0
   0   6  -8   47.04    6.25   0
   0  -6  -8   37.12    9.58   0
   0   6  -9   -0.35    2.46   0
   0   6   9    2.18    3.81   0
   0   6  -9   -5.42    2.14   0
   0  -6  -9   -1.31    4.79   0
   0   6  10    4.27    5.26   0
   0   6 -10   12.17    3.81   0
   0  -6 -10    3.70    4.98   0
   0   6 -11    8.29    3.33   0
   0   6  11    0.76    4.45   0
   0  -6 -11    8.63    6.86   0
   0   6  12    2.27    4.39   0
   0   6 -12   16.06    4.06   0
   0   6  12    7.19    5.67   0
   0  -6 -12   10.05    7.04   0
   0   6 -13   13.62    4.03   0
   0  -6 -13    5.26    7.00   0
   0  -6 -14   -9.04    5.25   0
   0   7   0    3.68    3.72   0
   0  -7   0    0.93    2.94   0
   0   7  -1   -1.42    3.24   0
   0   7   1    4.30    4.35   0
   0  -7   1   -4.83    1.89   0
   0  -7  -1    1.06    3.26   0
   0   7   2   12.34    5.24   0
   0   7  -2    7.62    4.35   0
   0  -7   2    5.46    3.22   0
   0  -7  -2    3.95    4.08   0
   0   7  -3    6.24    3.77   0
   0   7   3    6.13    4.43   0
   0  -7   3    8.59    3.11   0
   0  -7  -3    2.53    3.80   0
   0   7  -4   -0.18    4.95   0
   0   7   4   -1.17    4.09   0
   0   7  -4   -1.18    2.81   0
   0  -7   4    4.44    2.00   0
   0  -7  -4    7.12    4.93   0
   0   7  -5    3.44    3.38   0
   0   7   5    4.13    4.93   0
   0   7  -5    8.70    4.02   0
   0  -7  -5    7.49    5.43   0
   0   7  -6   30.52    6.30   0
   0   7   6   27.21    8.39   0
   0   7  -6   37.18    6.86   0
   0  -7  -6   42.58   10.05   0
   0   7  -7    1.21    3.09   0
   0   7   7   -3.82    3.80   0
   0  -7  -7    3.84    5.21   0
   0   7  -8    0.02    2.99   0
   0   7   8    0.83    4.95   0
   0  -7  -8    8.93    5.79   0
   0   7  -9    4.92    3.77   0
   0   7  -9    5.23    3.27   0
   0   7   9    7.92    6.08   0
   0  -7  -9    3.59    5.15   0
   0   7 -10    6.72    3.62   0
   0   7  10    1.07    4.95   0
   0  -7 -10   -2.41    4.62   0
   0   7  11    0.89    4.53   0
   0   7 -11   -1.22    2.65   0
   0  -7 -11    2.46    5.39   0
   0   7 -12   37.95    6.92   0
   0   7  12   21.43    8.57   0
   0  -7 -12   35.79   10.86   0
   0  -7 -13    8.36    8.08   0
   0   8   0   42.84    9.28   0
   0  -8   0   48.43    9.00   0
   0   8   1   97.41   13.36   0
   0   8  -1  121.17   14.65   0
   0  -8  -1  100.37   13.01   0
   0  -8   1  110.32   12.85   0
   0   8  -2    9.48    5.73   0
   0   8   2   11.59    5.55   0
   0  -8  -2    3.95    4.05   0
   0  -8   2   12.54    4.58   0
   0   8  -3    8.16    5.05   0
   0   8   3    6.94    5.43   0
   0  -8  -3    4.05    5.36   0
   0  -8   3   11.86    4.02   0
   0   8  -4    3.64    3.89   0
   0   8   4    6.55    5.59   0
   0  -8  -4    4.56    4.50   0
   0   8   5   12.84    6.53   0
   0   8  -5   11.76    5.03   0
   0  -8  -5    7.50    5.51   0
   0   8  -6   20.82    6.29   0
   0   8   6   24.48    8.03   0
   0  -8  -6   24.82    8.67   0
   0   8   7   -5.29    3.20   0
   0   8  -7   -1.35    3.28   0
   0  -8  -7    0.10    4.50   0
   0   8  -8    0.14    3.59   0
   0   8   8   15.12    7.34   0
   0  -8  -8   16.95    7.27   0
   0   8   9   -0.32    5.11   0
   0   8  -9    1.08    3.74   0
   0   8  -9    1.69    3.66   0
   0  -8  -9    3.23    6.15   0
   0   8  10   -1.01    6.00   0
   0   8 -10    3.98    3.86   0
   0  -8 -10    6.08    5.79   0
   0   8  11    3.95    6.94   0
   0   8 -11    3.91    3.94   0
   0  -8 -11   -3.33    4.92   0
   0   8  12   -1.07    4.99   0
   0   8  12   -2.23    5.36   0
   0   8 -12   -2.83    3.03   0
   0  -8 -12   -3.86    5.59   0
   0   9   0   -5.92    3.14   0
   0  -9   0   -1.78    3.52   0
   0   9  -1   -2.13    4.10   0
   0   9   1   -3.45    2.58   0
   0  -9  -1    1.09    4.12   0
   0  -9   1   -0.28    3.38   0
   0   9  -2   30.44    8.28   0
   0   9   2   31.18    8.74   0
   0  -9   2   30.22    6.87   0
   0  -9  -2   25.62    8.00   0
   0   9   3   -1.49    4.07   0
   0   9  -3    4.48    4.93   0
   0  -9  -3    6.98    5.37   0
   0   9   4   21.26    7.93   0
   0   9  -4    7.32    5.20   0
   0  -9  -4    5.88    5.46   0
   0   9   5   44.09   10.41   0
   0   9  -5   40.31    8.79   0
   0  -9  -5   53.05   12.14   0
   0   9   6   -0.23    5.49   0
   0   9  -6    2.92    4.09   0
   0  -9  -6    6.11    6.26   0
   0   9   7   -5.91    4.98   0
   0   9  -7    9.24    5.00   0
   0  -9  -7   -5.55    3.81   0
   0   9  -8    2.98    4.07   0
   0   9   8    7.36    6.35   0
   0  -9  -8    1.43    4.47   0
   0   9   9    1.10    6.54   0
   0   9  -9    3.84    4.35   0
   0   9  -9   -2.13    3.57   0
   0  -9  -9    3.42    6.32   0
   0   9 -10    1.77    4.05   0
   0   9  10   -5.98    5.78   0
   0  -9 -10    5.43    6.62   0
   0   9  11   -8.83    5.28   0
   0   9 -11    0.25    4.33   0
   0  -9 -11   -5.72    4.96   0
   0  10   0   13.06    7.10   0
   0 -10   0   11.67    6.07   0
   0  10  -1   19.61    7.02   0
   0  10   1   18.84    7.76   0
   0 -10  -1   18.64    7.03   0
   0  10  -2    3.95    5.15   0
   0  10   2   16.06    6.94   0
   0 -10  -2    6.16    5.85   0
   0  10   3   48.22   11.66   0
   0  10  -3   51.41   10.77   0
   0 -10  -3   44.75   10.54   0
   0  10   4    5.09    6.87   0
   0  10  -4    4.80    5.13   0
   0 -10  -4   -3.21    4.42   0
   0  10  -5    5.87    5.27   0
   0  10   5    5.76    6.68   0
   0 -10  -5   14.56    7.81   0
   0  10  -6    3.72    5.36   0
   0  10   6   -2.28    5.78   0
   0 -10  -6    1.52    6.21   0
   0  10   7   37.50   11.78   0
   0  10  -7   15.12    6.96   0
   0 -10  -7   34.11   11.40   0
   0  10   8   -3.52    6.04   0
   0  10  -8   -0.13    4.63   0
   0 -10  -8   -1.67    4.58   0
   0  10  -9    2.29    5.02   0
   0  10  -9    2.02    4.81   0
   0  10   9    6.15    8.49   0
   0 -10  -9    6.67    8.37   0
   0  11   0    3.63    6.21   0
   0  11  -1    1.97    5.77   0
   0  11   1   -1.25    4.92   0
   0  11   2    3.98    6.63   0
   0  11  -2   -0.53    5.82   0
   0  11  -3   -2.83    5.24   0
   0  11   3    8.40    8.09   0
   0 -11  -3    1.39    4.94   0
   0  11  -4    5.94    6.00   0
   0  11   4   -0.14    6.22   0
   0 -11  -4    2.90    5.36   0
   0  11   5    5.12    7.76   0
   0  11  -5   11.04    6.79   0
   0 -11  -5    8.47    7.43   0
   0  11  -6    3.97    6.32   0
   0  11   6    3.62    6.96   0
   0 -11  -6    5.70    7.59   0
   1   0 -17   -3.07    4.25   0
   1   0 -16   -0.20    3.51   0
   1   0 -15    1.41    4.08   0
   1   0 -14   68.40   10.43   0
   1   0 -13    3.30    3.37   0
   1   0 -12  209.54   13.99   0
   1   0 -12  202.83   13.70   0
   1   0 -11    2.66    3.08   0
   1   0 -11    4.88    3.10   0
   1   0 -10   53.55    7.38   0
   1   0 -10   52.31    7.39   0
   1   0  -9   -0.52    1.86   0
   1   0  -9    1.24    2.14   0
   1   0  -8   27.19    4.74   0
   1   0  -8   25.70    4.73   0
  -1   0   7    0.17    0.66   0
   1   0  -7   -1.19    1.82   0
   1   0  -7   -0.73    1.80   0
  -1   0   7    0.37    1.00   0
   1   0  -6   12.99    3.06   0
  -1   0   6   13.67    2.15   0
  -1   0   6    6.33    1.52   0
   1   0  -6   12.27    2.95   0
  -1   0   5    0.24    1.18   0
   1   0  -5    0.60    1.72   0
  -1   0   5    0.80    1.23   0
   1   0  -5    1.27    1.74   0
  -1   0   4  335.18   12.82   0
  -1   0   4  343.67   12.84   0
   1   0  -4  336.60   13.53   0
   1   0  -4  317.37   13.43   0
   1   0  -3    3.57    1.71   0
   1   0  -3    0.95    1.40   0
  -1   0   3    3.35    1.43   0
  -1   0   3    3.13    1.47   0
   1   0  -2  198.24    8.17   0
  -1   0   2  203.81    8.14   0
  -1   0   2  204.84    8.12   0
   1   0  -2  201.83    8.26   0
  -1   0  -2 2454.41   78.74   0
   1   0   2 2379.26   78.22   0
  -1   0  -2 2468.38   78.71   0
  -1   0  -3    2.41    1.27   0
  -1   0  -3    1.35    1.11   0
  -1   0  -3    1.39    1.12   0
   1   0   3    1.24    0.61   0
  -1   0  -4   10.10    2.05   0
  -1   0  -4   11.68    2.07   0
  -1   0  -5    0.60    1.49   0
  -1   0  -5    5.47    1.92   0
  -1   0  -6  186.56    9.30   0
  -1   0  -6  183.47    9.15   0
  -1   0  -7    0.09    1.77   0
  -1   0  -7   -0.24    1.67   0
  -1   0  -8   90.51    6.84   0
  -1   0  -8   94.35    7.01   0
  -1   0  -9    3.08    2.62   0
  -1   0  -9   -1.64    1.92   0
  -1   0 -10    4.12    2.90   0
  -1   0 -10    8.99    3.42   0
  -1   0 -11   -1.96    2.29   0
  -1   0 -11    1.14    2.74   0
  -1   0 -12  576.78   27.03   0
  -1   0 -12  604.85   28.11   0
  -1   0 -13    0.28    3.29   0
  -1   0 -14    4.42    4.27   0
  -1   0 -15   -1.04    3.74   0
  -1   0 -16   15.41    5.90   0
   1   1 -17    5.50    5.21   0
   1  -1 -17    3.51    5.45   0
   1   1 -16   39.00    8.09   0
   1  -1 -16   42.65    9.87   0
   1   1 -15   81.92   11.28   0
   1  -1 -15   65.41   11.08   0
   1   1 -14    7.53    4.06   0
   1  -1 -14    2.66    4.47   0
   1   1 -13   53.93    8.21   0
   1  -1 -13   54.64    9.62   0
   1   1 -12   13.27    4.25   0
   1   1 -12   13.34    4.28   0
   1  -1 -12    4.92    4.36   0
  -1   1  11   47.07    3.43   0
   1   1 -11   76.79    8.32   0
   1   1 -11   58.52    7.47   0
  -1   1  11   56.40    3.78   0
   1  -1 -11   59.57    9.08   0
   1  -1 -11   53.03    8.23   0
  -1   1  10    7.40    2.13   0
  -1   1  10   14.92    2.99   0
   1   1 -10   14.69    4.01   0
   1   1 -10   14.43    3.77   0
   1  -1 -10   13.27    4.61   0
   1  -1 -10   20.42    5.31   0
   1   1  -9    3.95    2.23   0
  -1   1   9    0.40    1.54   0
  -1   1   9    1.11    1.94   0
   1   1  -9   -0.10    1.90   0
   1  -1  -9    1.85    3.04   0
   1  -1  -9   -4.62    1.60   0
   1   1  -8    2.89    1.94   0
   1   1  -8    3.16    2.07   0
  -1   1   8    5.64    2.32   0
  -1   1   8    7.64    2.55   0
   1  -1  -8    0.87    2.40   0
   1  -1  -8    6.09    3.04   0
  -1   1   7   68.04    5.53   0
   1   1  -7   59.57    4.82   0
  -1   1   7   56.49    5.17   0
   1   1  -7   62.91    4.89   0
   1  -1  -7   67.30    7.80   0
   1  -1  -7   57.41    7.14   0
   1   1  -6   75.14    4.92   0
  -1   1   6   67.11    5.54   0
  -1   1   6   73.09    5.69   0
   1   1  -6   62.38    4.68   0
   1  -1  -6   71.45    6.31   0
   1  -1  -6   69.59    7.37   0
  -1   1   5  139.37    8.09   0
   1   1  -5  138.75    6.77   0
  -1   1   5  137.07    7.99   0
   1   1  -5  145.25    6.81   0
   1  -1  -5  125.25    8.33   0
   1  -1  -5  128.70    8.42   0
  -1   1   4   26.38    3.87   0
   1   1  -4   24.81    2.71   0
  -1   1   4   26.60    3.97   0
   1   1  -4   24.18    2.66   0
   1  -1  -4   30.54    4.27   0
   1  -1  -4   27.99    4.24   0
   1   1  -3  750.08   25.47   0
  -1   1   3  706.63   27.13   0
   1   1  -3  749.09   25.40   0
  -1   1   3  748.93   27.28   0
   1  -1  -3  742.25   27.47   0
   1  -1  -3  758.92   27.51   0
   1   1  -2  709.41   24.84   0
   1   1  -2  721.17   24.82   0
  -1   1   2  717.53   26.20   0
  -1   1   2  755.37   26.47   0
   1  -1  -2  737.33   26.31   0
   1  -1  -2  722.37   26.32   0
  -1  -1   2  744.86   24.56   0
  -1  -1   2  724.38   24.47   0
   1   1   1  220.90    9.62   0
   1   1   1  211.70    9.50   0
  -1   1  -1  244.27    8.14   0
  -1   1  -1  241.03    8.12   0
  -1  -1  -1  218.38    9.63   0
  -1  -1  -1  220.16    9.57   0
   1   1   2  430.81   16.96   0
   1   1   2  446.60   17.01   0
  -1  -1  -2  454.90   17.23   0
  -1  -1  -2  441.38   17.00   0
   1   1   3  137.76    7.51   0
   1   1   3  143.47    7.55   0
  -1  -1  -3  155.15    7.93   0
  -1  -1  -3  150.69    8.09   0
   1   1   4   17.20    3.15   0
   1   1   4   22.71    3.41   0
   1   1   4   23.24    3.58   0
  -1  -1  -4   12.37    2.97   0
  -1  -1  -4   15.85    3.39   0
   1   1   5   16.49    3.12   0
   1   1   5   17.06    3.18   0
   1   1   5   16.57    3.20   0
  -1  -1  -5   17.18    3.72   0
  -1  -1  -5   17.45    3.78   0
   1   1   6    8.80    2.45   0
   1   1   6    6.81    2.28   0
  -1   1  -6    8.42    1.55   0
  -1   1  -6   10.18    1.57   0
  -1  -1  -6    8.58    2.97   0
  -1  -1  -6   10.44    3.37   0
   1   1   7   98.07    6.26   0
  -1   1  -7  114.33    5.77   0
  -1   1  -7  103.33    5.56   0
   1   1   7  100.53    6.32   0
  -1  -1  -7  108.29    8.21   0
  -1  -1  -7   99.60    7.87   0
   1   1   8    1.12    1.45   0
  -1   1  -8   -0.25    1.41   0
  -1   1  -8    0.55    1.65   0
   1   1   8    2.69    1.45   0
  -1  -1  -8   -0.33    2.44   0
  -1  -1  -8   -2.33    1.95   0
  -1   1  -9   36.23    4.70   0
   1   1   9   33.13    3.03   0
   1   1   9   37.33    3.03   0
  -1   1  -9   30.33    4.42   0
  -1  -1  -9   41.33    6.76   0
  -1  -1  -9   33.62    6.05   0
  -1   1 -10   11.67    3.23   0
  -1   1 -10   15.59    3.53   0
  -1  -1 -10   15.12    4.72   0
  -1  -1 -10   19.24    5.23   0
  -1   1 -11   27.24    5.01   0
  -1   1 -11   26.26    4.80   0
  -1  -1 -11   24.71    5.98   0
  -1  -1 -11   26.72    6.37   0
  -1   1 -12   50.97    7.01   0
  -1   1 -12   44.75    6.67   0
  -1  -1 -12   42.91   12.43   0
  -1  -1 -12   52.59    8.84   0
  -1   1 -13   40.89    6.71   0
  -1  -1 -13   23.56    6.49   0
  -1   1 -14  105.86   11.44   0
  -1  -1 -14   91.19   12.49   0
  -1   1 -15   10.65    4.73   0
  -1  -1 -15   18.95    6.89   0
  -1   1 -16   18.38    6.27   0
  -1  -1 -16    8.55    5.41   0
   1   2 -17    1.26    4.20   0
   1  -2 -17    7.28    6.50   0
   1   2 -16    3.44    4.08   0
   1  -2 -16   -2.02    4.62   0
   1   2 -15   33.03    6.42   0
   1  -2 -15   28.39    8.79   0
   1   2 -14    1.20    3.08   0
   1  -2 -14   -2.85    4.12   0
   1   2 -13    1.29    2.84   0
   1  -2 -13    6.62    5.03   0
   1   2 -12   26.83    5.18   0
   1   2 -12   24.75    4.86   0
   1  -2 -12   22.21    7.02   0
   1   2 -11   30.49    4.83   0
  -1   2  11   24.74    4.71   0
   1   2 -11   27.70    4.67   0
  -1   2  11   18.53    4.29   0
   1  -2 -11   21.86    6.65   0
   1   2 -10    0.69    1.73   0
   1   2 -10    2.18    2.05   0
  -1   2  10   -1.69    2.00   0
   1  -2 -10   -1.41    2.70   0
   1   2  -9    8.06    2.62   0
   1   2  -9   18.37    3.42   0
  -1   2   9   10.42    3.55   0
   1  -2  -9   10.25    4.69   0
   1  -2  -9   16.60    5.36   0
   1   2  -8    3.51    1.83   0
   1   2  -8    3.29    1.81   0
  -1   2   8   -1.38    1.93   0
   1  -2  -8    0.76    2.39   0
   1  -2  -8    2.17    2.98   0
  -1   2   7    6.92    2.94   0
   1   2  -7    4.79    1.95   0
   1   2  -7   10.96    2.29   0
   1  -2  -7    7.74    3.68   0
   1  -2  -7    9.81    3.82   0
  -1   2   6   16.70    4.00   0
   1   2  -6   13.93    2.38   0
   1   2  -6   12.39    2.35   0
   1  -2  -6    5.21    3.15   0
   1  -2  -6   15.89    4.45   0
  -1   2   5   85.96    7.06   0
  -1   2   5   90.64    7.11   0
   1   2  -5   84.18    4.80   0
   1   2  -5   79.43    4.70   0
   1  -2  -5   75.80    8.27   0
   1  -2  -5   83.77    7.55   0
   1   2  -4    0.11    1.34   0
  -1   2   4    0.94    2.40   0
  -1   2   4    1.69    2.27   0
   1   2  -4    2.18    1.49   0
   1  -2  -4    0.04    2.44   0
   1  -2  -4    0.45    2.36   0
   1   2  -3 3473.93  110.31   0
  -1   2   3 3314.16  112.81   0
   1   2  -3 3370.75  110.16   0
  -1   2   3 3336.17  113.12   0
   1  -2  -3 3443.22  113.35   0
   1  -2  -3 3313.20  113.06   0
  -1  -2   3 3406.01  108.71   0
  -1   2   2 9951.01  328.01   0
  -1   2   2 9903.64  316.61   0
   1   2  -2 9905.00  321.05   0
   1   2  -2 9449.78  321.45   0
   1  -2  -2 9565.74  316.61   0
  -1  -2   2 9651.15  319.77   0
   1  -2  -2 9868.12  316.63   0
  -1  -2   2 9999.00  319.00   0
   1   2  -1   46.06    4.52   0
   1   2  -1   48.25    4.11   0
  -1   2   1   38.75    4.64   0
  -1   2   1   34.13    4.46   0
   1  -2  -1   60.22    6.09   0
   1  -2  -1   33.95    4.35   0
  -1  -2   1   49.79    3.94   0
  -1  -2   1   52.03    4.15   0
   1   2   0    1.53    1.99   0
  -1   2   0    1.69    1.92   0
   1   2   0   -1.23    1.72   0
  -1   2   0    2.69    2.04   0
   1  -2   0    2.27    1.89   0
  -1  -2   0    1.65    1.93   0
   1  -2   0    2.62    1.99   0
  -1  -2   0   -0.14    2.00   0
   1   2   1  786.00   27.86   0
   1   2   1  758.66   27.66   0
  -1   2  -1  747.44   26.12   0
  -1   2  -1  720.72   25.97   0
  -1  -2  -1  702.81   27.46   0
   1  -2   1  723.74   25.50   0
   1  -2   1  732.77   25.49   0
  -1  -2  -1  712.83   27.41   0
   1   2   2    3.50    2.61   0
  -1   2  -2    1.73    1.20   0
  -1   2  -2    1.83    1.19   0
   1   2   2    0.67    2.05   0
  -1  -2  -2    2.30    2.36   0
  -1  -2  -2    4.44    2.51   0
   1   2   3   35.51    5.12   0
   1   2   3   41.80    5.49   0
  -1  -2  -3   41.39    5.82   0
  -1  -2  -3   39.56    5.22   0
   1   2   4    8.61    3.05   0
   1   2   4   11.15    3.47   0
  -1  -2  -4   12.70    3.73   0
  -1  -2  -4   12.28    3.62   0
   1   2   5  153.47    9.48   0
   1   2   5  149.71    9.47   0
  -1  -2  -5  148.14   10.21   0
  -1  -2  -5  170.11   10.48   0
   1   2   6   -0.52    1.95   0
  -1  -2  -6   -1.96    2.12   0
  -1  -2  -6   -0.64    2.07   0
   1   2   7  104.03    7.84   0
   1   2   7  107.65    7.92   0
  -1  -2  -7  104.04    9.08   0
  -1  -2  -7  100.68    8.63   0
  -1   2  -8   27.29    2.60   0
   1   2   8   34.65    5.34   0
   1   2   8   23.52    4.64   0
  -1   2  -8   26.06    2.57   0
  -1  -2  -8   22.86    5.74   0
  -1  -2  -8   16.78    5.19   0
  -1   2  -9   -0.77    1.11   0
  -1   2  -9   -0.51    1.17   0
   1   2   9   -2.53    1.63   0
  -1  -2  -9   -1.12    2.80   0
  -1  -2  -9    3.12    3.22   0
   1   2  10   46.48    5.89   0
  -1   2 -10   42.36    4.69   0
  -1   2 -10   46.54    4.80   0
  -1  -2 -10   42.54    7.92   0
  -1   2 -11   55.05    5.80   0
  -1   2 -11   54.85    5.98   0
   1   2  11   36.77    4.97   0
  -1  -2 -11   41.13    8.05   0
  -1   2 -12   39.29    5.29   0
  -1   2 -12   25.09    5.24   0
  -1  -2 -12   26.11    7.00   0
  -1   2 -13    7.25    2.97   0
  -1  -2 -13    7.28    5.02   0
  -1   2 -14   22.31    4.80   0
  -1  -2 -14   22.68    7.27   0
  -1   2 -15   -0.49    3.05   0
  -1  -2 -15    0.10    4.63   0
  -1   2 -16   10.49    4.82   0
  -1  -2 -16   25.52    8.11   0
   1   3 -16    0.28    3.49   0
   1  -3 -16    5.41    6.24   0
   1   3 -15   25.97    5.69   0
   1  -3 -15    8.75    6.15   0
   1   3 -14    4.48    3.29   0
   1  -3 -14   15.55    6.98   0
   1   3 -13   18.78    4.45   0
   1  -3 -13   10.79    6.74   0
   1   3 -12    7.05    2.86   0
  -1   3  12    2.90    2.74   0
  -1   3  12    3.85    3.31   0
   1  -3 -12    4.16    4.42   0
   1   3 -11   93.92    7.11   0
  -1   3  11  118.33    9.96   0
   1   3 -11  109.62    7.49   0
   1  -3 -11   86.22   12.92   0
   1   3 -10    7.81    2.57   0
   1   3 -10    6.52    2.56   0
  -1   3  10   -1.63    2.61   0
   1  -3 -10    6.90    4.24   0
  -1   3   9   10.17    4.12   0
   1   3  -9   11.09    2.70   0
   1   3  -9    7.67    2.44   0
   1  -3  -9    8.33    5.35   0
  -1   3   8   28.92    5.91   0
   1   3  -8   20.97    3.32   0
   1   3  -8   21.72    3.39   0
   1  -3  -8   22.01    6.00   0
   1   3  -7    0.52    1.31   0
   1   3  -7    1.24    1.56   0
  -1   3   7    0.69    2.51   0
   1  -3  -7    0.32    2.96   0
   1   3  -6   14.52    2.73   0
  -1   3   6   20.62    4.91   0
   1   3  -6   17.20    3.01   0
   1   3  -6   17.10    2.96   0
   1  -3  -6   10.64    4.44   0
  -1   3   5  118.68    9.45   0
   1   3  -5  108.52    6.60   0
   1   3  -5  119.22    6.73   0
   1  -3  -5  127.95    9.90   0
   1  -3  -5  137.79   10.43   0
  -1   3   4  187.70   12.20   0
  -1   3   4  230.03   13.80   0
   1   3  -4  215.62    9.94   0
   1   3  -4  200.11    9.74   0
   1  -3  -4  194.21   12.49   0
   1  -3  -4  207.98   12.52   0
  -1   3   3  149.57    9.74   0
  -1   3   3  129.69    9.39   0
   1   3  -3  116.35    7.41   0
   1   3  -3  138.39    7.73   0
   1  -3  -3  147.86   10.17   0
   1  -3  -3  137.84    9.49   0
  -1  -3   3  127.70    6.43   0
  -1  -3   3  141.18    6.61   0
  -1   3   2 1420.66   52.26   0
   1   3  -2 1534.06   50.76   0
   1   3  -2 1433.10   50.41   0
  -1   3   2 1371.95   52.33   0
  -1  -3   2 1527.09   49.91   0
   1  -3  -2 1414.79   52.03   0
   1  -3  -2 1368.34   52.16   0
  -1  -3   2 1489.31   49.89   0
  -1   3   1   11.05    3.33   0
  -1   3   1   17.85    4.15   0
   1   3  -1   14.59    3.37   0
   1   3  -1   12.46    3.27   0
  -1  -3   1   15.03    3.47   0
   1  -3  -1   13.08    3.59   0
  -1  -3   1   19.46    3.61   0
   1  -3  -1   12.36    3.35   0
  -1   3   0   87.69    6.63   0
  -1   3   0   82.29    6.55   0
   1   3   0   83.52    6.67   0
   1   3   0   82.37    6.86   0
  -1  -3   0   83.36    6.50   0
  -1  -3   0   89.81    6.72   0
   1  -3   0   93.24    6.56   0
   1  -3   0   85.81    6.17   0
  -1   3  -1   24.53    4.11   0
   1   3   1   22.70    4.62   0
  -1   3  -1   26.00    4.34   0
   1   3   1   13.04    3.63   0
  -1  -3  -1   22.66    4.75   0
  -1  -3  -1   22.71    4.34   0
   1  -3   1   25.61    3.57   0
   1  -3   1   23.76    3.56   0
  -1   3  -2  298.39   12.64   0
  -1   3  -2  276.21   12.18   0
   1   3   2  259.87   14.24   0
   1   3   2  272.97   14.43   0
  -1  -3  -2  285.96   14.43   0
   1  -3   2  268.61   10.96   0
  -1  -3  -2  284.37   14.64   0
   1  -3   2  291.95   11.15   0
  -1   3  -3   25.62    3.31   0
   1   3   3   23.95    5.01   0
   1   3   3   20.67    4.56   0
  -1   3  -3   27.30    3.37   0
  -1  -3  -3   25.04    5.23   0
  -1  -3  -3   16.86    4.61   0
  -1   3  -4   25.51    2.77   0
   1   3   4   28.15    5.54   0
  -1   3  -4   26.47    2.91   0
  -1  -3  -4   18.86    4.75   0
  -1  -3  -4   27.17    5.61   0
   1   3   5   -0.05    2.63   0
  -1   3  -5   -0.60    0.71   0
  -1   3  -5   -0.49    0.76   0
  -1  -3  -5   -3.36    2.82   0
  -1  -3  -5   -1.56    2.57   0
   1   3   6   22.71    4.97   0
  -1  -3  -6   13.25    4.56   0
   1   3   7   30.79    5.82   0
  -1  -3  -7   24.83    5.97   0
   1   3   8   23.22    5.44   0
  -1  -3  -8   22.03    5.93   0
  -1   3  -9   64.10    3.63   0
   1   3   9   60.66    8.33   0
   1   3   9   72.54    8.96   0
  -1   3  -9   56.88    3.41   0
  -1  -3  -9   51.08    9.16   0
   1   3  10  145.71   10.41   0
  -1   3 -10  128.68    6.45   0
  -1   3 -10  116.12    6.16   0
   1   3  10  137.94   10.31   0
  -1  -3 -10  116.10   13.82   0
  -1   3 -11  100.60    6.08   0
  -1   3 -11  104.45    6.13   0
   1   3  11   94.95    8.43   0
  -1  -3 -11   86.11   12.24   0
  -1   3 -12   -1.78    1.68   0
  -1  -3 -12   -2.60    3.44   0
  -1   3 -13    2.74    2.45   0
  -1  -3 -13    3.27    4.67   0
  -1   3 -14   -3.57    2.11   0
  -1  -3 -14    1.05    4.78   0
  -1   3 -15   -3.98    2.39   0
  -1  -3 -15   -1.33    4.63   0
  -1  -3 -16    1.73    5.31   0
   1  -4 -16   39.14   11.76   0
   1   4 -15   15.51    4.25   0
   1  -4 -15   -0.63    5.16   0
   1   4 -14    0.42    2.49   0
   1  -4 -14    1.15    4.80   0
   1   4 -13   18.23    4.12   0
   1  -4 -13   16.04    7.49   0
  -1   4  12   26.49    6.52   0
   1   4 -12   17.77    4.18   0
   1  -4 -12   30.99    8.93   0
   1   4 -11    5.19    2.49   0
  -1   4  11    0.36    3.44   0
   1   4 -11    5.93    2.82   0
   1  -4 -11   -0.25    4.33   0
   1   4 -10   79.53    6.27   0
   1   4 -10   72.39    5.89   0
  -1   4  10   87.71   11.63   0
   1  -4 -10   61.88   11.04   0
   1   4  -9   12.63    3.21   0
  -1   4   9   12.18    5.12   0
   1   4  -9   12.34    3.17   0
   1  -4  -9    7.73    4.72   0
   1   4  -8   54.55    4.90   0
  -1   4   8   50.96    8.56   0
   1   4  -8   55.12    5.94   0
   1  -4  -8   42.77    9.12   0
  -1   4   7   -0.83    3.12   0
   1   4  -7    0.36    1.88   0
   1   4  -7    2.49    1.94   0
   1   4  -7    1.41    1.79   0
   1  -4  -7    2.16    2.90   0
   1   4  -6   61.77    5.40   0
  -1   4   6   66.13    9.25   0
   1   4  -6   66.88    5.34   0
   1  -4  -6   46.64    8.53   0
  -1   4   5   23.11    6.17   0
   1   4  -5   20.22    3.71   0
   1   4  -5   16.90    3.62   0
   1  -4  -5   19.28    5.39   0
  -1   4   4  709.70   32.30   0
   1   4  -4  793.02   29.37   0
   1   4  -4  752.96   29.13   0
   1  -4  -4  718.76   32.59   0
  -1  -4   4  774.89   25.92   0
   1   4  -3   13.62    3.53   0
  -1   4   3   31.67    6.27   0
   1   4  -3   16.72    3.78   0
   1  -4  -3   24.02    5.57   0
  -1  -4   3   19.09    3.44   0
  -1  -4   3   20.03    3.22   0
   1   4  -2  445.93   19.17   0
   1   4  -2  401.96   18.89   0
  -1   4   2  410.04   20.27   0
  -1   4   2  427.20   20.81   0
  -1  -4   2  433.47   18.27   0
  -1  -4   2  435.29   18.18   0
   1  -4  -2  403.33   20.24   0
   1   4  -1    2.78    2.21   0
  -1   4   1    0.14    2.42   0
  -1   4   1    0.43    2.25   0
   1   4  -1    5.18    3.15   0
  -1  -4   1    1.98    2.56   0
  -1  -4   1    1.10    2.23   0
   1  -4  -1    5.32    3.05   0
   1  -4  -1    0.69    2.54   0
   1   4   0   40.44    6.23   0
  -1   4   0   22.44    4.72   0
  -1   4   0   21.46    4.71   0
   1   4   0   37.41    6.33   0
   1  -4   0   19.86    4.35   0
  -1  -4   0   31.20    5.36   0
   1  -4   0   21.22    4.35   0
  -1  -4   0   22.51    4.77   0
   1   4   1   73.00    8.35   0
  -1   4  -1   82.38    6.78   0
  -1   4  -1   79.39    6.93   0
   1   4   1   59.05    7.69   0
   1  -4   1   74.46    5.97   0
   1  -4   1   69.14    5.85   0
  -1  -4  -1   69.45    8.44   0
  -1   4  -2   74.99    6.35   0
   1   4   2   85.36    9.33   0
  -1   4  -2   84.44    6.94   0
   1  -4   2   92.72    5.94   0
  -1  -4  -2   81.63    9.50   0
   1  -4   2   93.47    5.88   0
  -1   4  -3    5.04    2.55   0
  -1   4  -3    8.58    2.66   0
   1   4   3    7.58    3.58   0
   1  -4   3    7.95    1.47   0
  -1  -4  -3    6.60    3.66   0
   1  -4   3    7.08    1.41   0
   1   4   4   16.09    4.99   0
  -1   4  -4   18.92    3.55   0
  -1   4  -4   28.60    4.13   0
  -1  -4  -4   17.54    5.44   0
   1   4   5    8.34    4.02   0
  -1   4  -5   10.98    2.65   0
  -1   4  -5   10.13    2.57   0
  -1  -4  -5    4.75    3.40   0
   1   4   6   40.58    7.64   0
  -1   4  -6   33.55    3.80   0
  -1   4  -6   32.08    3.61   0
  -1  -4  -6   37.53    7.44   0
   1   4   7   62.64    9.34   0
  -1   4  -7   54.38    3.96   0
  -1   4  -7   52.66    3.83   0
  -1  -4  -7   44.58    8.32   0
  -1   4  -8  145.82    6.76   0
   1   4   8  146.27   11.86   0
  -1   4  -8  128.77    6.54   0
  -1  -4  -8  145.46   12.76   0
  -1   4  -9   12.09    2.24   0
  -1   4  -9    9.73    2.04   0
   1   4   9   12.77    4.81   0
  -1  -4  -9   14.12    5.78   0
  -1   4 -10   10.00    2.30   0
   1   4  10    4.50    4.10   0
   1   4  10    5.14    3.76   0
  -1   4 -10   12.58    2.34   0
  -1  -4 -10   -0.71    3.96   0
   1   4  11    6.14    4.01   0
  -1   4 -11    5.83    1.95   0
  -1   4 -11    6.80    2.02   0
   1   4  11    1.07    3.33   0
  -1  -4 -11    1.64    4.46   0
  -1   4 -12    6.94    2.10   0
  -1  -4 -12    6.88    5.82   0
  -1   4 -13    5.49    2.37   0
  -1  -4 -13    2.65    5.07   0
  -1  -4 -14   -1.84    4.63   0
  -1  -4 -15    4.84    6.09   0
   1  -5 -15   13.67    8.39   0
   1   5 -14   20.54    4.56   0
   1  -5 -14   26.70   10.03   0
   1   5 -13    4.37    2.81   0
   1  -5 -13   -1.41    4.74   0
  -1   5  12    0.58    4.03   0
   1   5 -12    4.29    2.88   0
   1  -5 -12    1.31    4.80   0
   1   5 -11    3.08    2.51   0
  -1   5  11    4.38    4.36   0
   1  -5 -11    6.44    5.83   0
   1   5 -10   -0.23    2.37   0
   1   5 -10    2.97    2.33   0
  -1   5  10    1.27    3.81   0
   1  -5 -10   -1.60    3.23   0
   1   5  -9   37.01    5.62   0
  -1   5   9   31.20    8.05   0
   1   5  -9   39.78    5.66   0
   1  -5  -9   33.10    9.13   0
   1   5  -8    3.47    2.54   0
   1   5  -8    2.54    2.29   0
   1   5  -8    3.74    2.54   0
  -1   5   8    2.46    4.09   0
   1  -5  -8    2.26    4.19   0
  -1   5   7   69.15   10.22   0
   1   5  -7   70.72    7.77   0
   1   5  -7   67.18    7.43   0
   1  -5  -7   71.15   11.45   0
  -1   5   6   80.71   11.10   0
   1   5  -6   89.72    7.28   0
   1   5  -6   81.60    6.92   0
   1  -5  -6   83.85   12.23   0
  -1   5   5   41.33    8.18   0
   1   5  -5   60.92    7.11   0
   1   5  -5   55.25    6.83   0
   1  -5  -5   54.28    9.23   0
  -1   5   4   12.50    5.13   0
   1   5  -4   14.56    4.10   0
   1   5  -4   17.20    4.30   0
  -1  -5   4   22.33    3.27   0
   1  -5  -4   14.47    5.24   0
  -1  -5   4   21.35    3.12   0
   1   5  -3  260.43   14.28   0
  -1   5   3  227.79   15.47   0
   1   5  -3  251.38   13.88   0
   1  -5  -3  209.85   14.99   0
  -1  -5   3  257.27   12.25   0
  -1  -5   3  248.24   12.40   0
  -1   5   2  161.45   12.46   0
   1   5  -2  153.40   10.84   0
   1   5  -2  159.73   10.84   0
  -1  -5   2  152.55    9.84   0
   1  -5  -2  160.76   11.80   0
   1   5  -1   96.31   10.45   0
   1   5  -1  103.45    8.82   0
  -1   5   1  102.25   11.47   0
   1  -5  -1  106.34    9.24   0
  -1  -5   1  107.37    8.64   0
  -1   5   0  138.37   10.69   0
   1   5   0  128.13   10.51   0
  -1   5   0  133.19   10.28   0
   1  -5   0  142.04   10.12   0
  -1  -5   0  135.40   10.23   0
  -1   5  -1  140.31   10.15   0
   1   5   1  138.57   10.94   0
  -1   5  -1  156.22   10.86   0
  -1  -5  -1  145.84   11.16   0
   1  -5   1  120.94    8.79   0
  -1   5  -2   10.56    3.84   0
   1   5   2    3.79    3.42   0
  -1   5  -2   10.43    3.54   0
   1  -5   2    7.11    2.49   0
  -1  -5  -2    3.02    3.34   0
   1  -5   2    3.12    2.17   0
   1   5   3   24.05    6.23   0
  -1   5  -3   27.86    5.20   0
  -1   5  -3   24.02    4.86   0
  -1  -5  -3   19.13    5.98   0
   1  -5   3   26.10    3.53   0
   1  -5   3   27.86    3.66   0
  -1   5  -4   30.14    5.14   0
  -1   5  -4   35.81    5.27   0
   1   5   4   32.77    7.19   0
  -1  -5  -4    7.91    4.33   0
  -1   5  -5    0.19    1.96   0
  -1   5  -5    0.70    2.18   0
   1   5   5    5.04    3.79   0
  -1  -5  -5    4.14    4.06   0
  -1   5  -6   44.45    5.45   0
   1   5   6   30.50    6.80   0
  -1   5  -6   37.66    5.23   0
  -1  -5  -6   39.95    8.27   0
  -1   5  -7   66.85    5.41   0
   1   5   7   59.22    9.87   0
  -1   5  -7   66.53    5.65   0
  -1  -5  -7   62.68   10.84   0
   1   5   8    1.38    3.68   0
  -1   5  -8    2.66    1.93   0
  -1   5  -8    3.15    2.16   0
  -1  -5  -8   -0.49    3.63   0
  -1   5  -9   60.36    5.15   0
  -1   5  -9   60.27    5.12   0
   1   5   9   49.12    9.52   0
  -1  -5  -9   67.25   11.57   0
  -1   5 -10    5.67    2.27   0
  -1   5 -10    9.19    2.60   0
   1   5  10   11.50    5.21   0
  -1  -5 -10    1.18    4.23   0
   1   5  11   70.45   11.29   0
   1   5  11  110.19   13.26   0
  -1   5 -11   71.12    5.65   0
  -1  -5 -11   68.07   12.98   0
  -1   5 -12   26.44    3.92   0
  -1  -5 -12   24.09    8.17   0
  -1   5 -13   21.07    5.52   0
  -1  -5 -13   16.12    7.57   0
  -1  -5 -14    1.72    6.99   0
  -1  -5 -15    7.13    7.31   0
   1  -6 -14   -3.07    4.84   0
   1   6 -13    2.43    3.50   0
   1  -6 -13   -4.12    4.12   0
  -1   6  12    1.37    4.08   0
   1   6 -12    3.35    3.19   0
   1  -6 -12    2.31    4.87   0
   1   6 -11    1.44    3.00   0
  -1   6  11    4.02    5.01   0
   1  -6 -11   -3.16    4.19   0
   1   6 -10    3.33    3.16   0
  -1   6  10    2.90    4.78   0
   1  -6 -10    6.17    4.84   0
  -1   6   9   -1.08    3.70   0
   1   6  -9    3.36    2.77   0
   1  -6  -9   -0.88    4.05   0
   1   6  -8    3.41    3.01   0
   1   6  -8    3.70    3.33   0
  -1   6   8    5.24    5.33   0
   1   6  -8    6.94    3.45   0
   1  -6  -8    7.46    5.30   0
   1   6  -7   87.52    9.33   0
   1   6  -7   58.87    7.90   0
  -1   6   7   82.96   12.78   0
   1  -6  -7   60.37   11.36   0
  -1   6   6  103.57   13.17   0
   1   6  -6  106.03    8.82   0
   1   6  -6   97.21    8.67   0
   1  -6  -6  104.61   14.62   0
  -1   6   5  156.46   13.88   0
   1   6  -5  154.40   11.20   0
   1   6  -5  169.63   11.41   0
   1  -6  -5  128.90   15.47   0
   1   6  -4   15.00    4.63   0
   1   6  -4   10.18    4.01   0
  -1   6   4    6.59    4.68   0
   1  -6  -4   12.06    5.48   0
  -1  -6   4    7.88    2.61   0
   1   6  -3   84.96   10.16   0
   1   6  -3   65.39    9.01   0
  -1   6   3   80.99   11.18   0
   1  -6  -3   80.64   11.17   0
  -1  -6   3   76.41    6.88   0
  -1   6   2  115.48   13.29   0
   1   6  -2  109.87   10.28   0
   1  -6  -2  153.27   12.23   0
  -1  -6   2  149.60   10.19   0
  -1   6   1  136.24   14.40   0
   1   6  -1  125.31   11.06   0
  -1  -6   1  131.93   10.53   0
   1  -6  -1  147.64   11.47   0
   1   6   0    3.78    3.38   0
  -1   6   0    8.97    4.56   0
   1  -6   0    9.83    4.14   0
  -1  -6   0   13.72    4.83   0
  -1   6  -1   80.27   10.64   0
   1   6   1   84.22   10.86   0
  -1  -6  -1  105.80   12.57   0
   1  -6   1   80.45    8.93   0
   1   6   2   14.07    4.93   0
  -1   6  -2   19.30    5.18   0
  -1   6  -2   24.70    6.07   0
   1  -6   2   20.23    4.31   0
  -1  -6  -2   11.29    4.75   0
  -1   6  -3    3.23    3.11   0
  -1   6  -3    9.69    3.97   0
   1   6   3    6.48    4.31   0
  -1  -6  -3   -0.74    3.36   0
   1  -6   3    6.13    2.49   0
   1   6   4   22.94    6.92   0
  -1   6  -4   21.14    5.02   0
  -1   6  -4   14.37    4.47   0
  -1  -6  -4   21.15    6.36   0
  -1   6  -5  175.95   11.36   0
   1   6   5  174.61   14.63   0
  -1   6  -5  189.17   11.78   0
  -1  -6  -5  143.24   16.34   0
   1   6   6   21.85    6.97   0
  -1   6  -6   15.10    4.04   0
  -1   6  -6   25.10    5.00   0
  -1  -6  -6   11.11    5.32   0
  -1   6  -7   28.87    5.12   0
  -1   6  -7   28.79    5.31   0
   1   6   7   37.10    8.60   0
  -1  -6  -7   26.39    8.05   0
  -1   6  -8   46.55    6.25   0
   1   6   8   44.98    9.92   0
  -1   6  -8   53.93    6.67   0
  -1  -6  -8   47.96   10.27   0
  -1   6  -9    2.25    2.40   0
   1   6   9    4.56    4.92   0
  -1  -6  -9    3.10    5.17   0
  -1   6 -10    0.09    2.17   0
   1   6  10   -1.86    3.43   0
  -1   6 -10   -2.95    1.67   0
  -1  -6 -10   -3.11    4.30   0
   1   6  11   16.23    6.35   0
   1   6  11   15.59    6.35   0
  -1   6 -11   21.71    4.36   0
  -1  -6 -11   25.91    9.06   0
  -1   6 -12    6.74    2.87   0
  -1  -6 -12   -2.68    4.55   0
  -1  -6 -13   76.33   15.19   0
  -1  -6 -14    5.32    7.49   0
   1   7 -13    1.73    3.14   0
   1  -7 -13    0.79    5.95   0
   1   7 -12    4.13    3.56   0
  -1   7  12   12.90    7.50   0
   1  -7 -12   -2.40    5.29   0
  -1   7  11    8.90    6.44   0
   1   7 -11   11.28    4.73   0
   1  -7 -11    6.46    6.33   0
  -1   7  10   28.98    8.96   0
   1   7 -10   19.61    5.23   0
   1  -7 -10   17.41    8.72   0
   1   7  -9    0.07    3.09   0
   1   7  -9    6.26    3.57   0
  -1   7   9    4.02    5.12   0
   1  -7  -9   -2.13    4.15   0
   1   7  -8   10.68    4.30   0
  -1   7   8    3.05    4.46   0
   1   7  -8   10.54    4.47   0
   1  -7  -8    3.67    4.40   0
   1   7  -7   15.33    5.33   0
  -1   7   7    9.96    6.56   0
   1  -7  -7   21.70    8.27   0
  -1   7   6   53.21   10.59   0
   1   7  -6   40.75    7.55   0
   1   7  -6   37.75    7.12   0
   1  -7  -6   32.41    8.90   0
   1   7  -5   31.76    6.93   0
   1   7  -5   33.35    6.97   0
  -1   7   5   40.68    9.00   0
  -1  -7   5   38.99    3.02   0
   1  -7  -5   47.17    9.75   0
  -1  -7   5   33.16    2.93   0
  -1   7   4   55.83   10.07   0
   1   7  -4   52.18    8.58   0
  -1  -7   4   60.14    6.75   0
   1  -7  -4   52.31   10.48   0
   1   7  -3    3.32    3.83   0
  -1   7   3    6.05    4.80   0
   1  -7  -3    1.35    3.71   0
  -1  -7   3    4.97    2.87   0
   1   7  -2  243.27   16.61   0
  -1   7   2  243.02   17.77   0
   1  -7  -2  250.25   17.18   0
  -1  -7   2  232.14   14.50   0
  -1   7   1  119.75   14.22   0
   1   7  -1  122.47   13.50   0
   1  -7  -1  129.23   11.72   0
  -1  -7   1  133.21   11.08   0
  -1   7   0   48.21    8.81   0
   1   7   0   42.58    8.97   0
  -1  -7   0   47.10    8.07   0
   1  -7   0   59.50    8.99   0
  -1   7  -1    0.39    3.05   0
   1   7   1    3.95    4.06   0
   1  -7   1    1.58    2.75   0
  -1  -7  -1   -2.74    2.64   0
   1   7   2    5.61    4.23   0
  -1   7  -2    0.27    3.02   0
  -1  -7  -2   -1.24    3.06   0
   1  -7   2    1.28    2.37   0
   1   7   3    1.18    4.14   0
  -1   7  -3    4.71    3.70   0
   1  -7   3   11.16    3.34   0
  -1  -7  -3    0.47    3.35   0
  -1   7  -4   55.25    8.56   0
  -1   7  -4   43.00    8.00   0
   1   7   4   49.00   10.11   0
  -1  -7  -4   52.86   10.17   0
   1  -7   4   55.09    3.98   0
   1  -7   4   55.06    4.01   0
   1   7   5    3.36    4.78   0
  -1   7  -5   -0.91    2.60   0
  -1   7  -5    0.17    2.83   0
  -1  -7  -5   -1.62    3.23   0
  -1   7  -6   68.81    9.23   0
   1   7   6   83.79   13.40   0
  -1   7  -6   74.72    9.18   0
  -1  -7  -6   72.72   12.46   0
  -1   7  -7   22.19    5.20   0
   1   7   7   15.35    6.85   0
  -1  -7  -7   20.02    6.89   0
   1   7   8    3.10    5.10   0
  -1   7  -8    1.23    2.80   0
  -1  -7  -8   -3.55    3.28   0
   1   7   9   -0.69    5.07   0
  -1   7  -9   -0.91    2.42   0
  -1  -7  -9    3.49    5.32   0
  -1   7 -10    2.00    2.80   0
   1   7  10    6.25    5.84   0
  -1   7 -10    3.21    3.01   0
  -1  -7 -10   -2.19    4.49   0
   1   7  11    2.15    5.40   0
  -1   7 -11    2.15    3.36   0
   1   7  11    5.73    4.99   0
  -1  -7 -11   -0.22    5.37   0
  -1   7 -12    4.75    3.58   0
  -1  -7 -12   -4.23    3.63   0
  -1  -7 -13    2.89    6.85   0
  -1   8  12    1.39    7.25   0
   1   8 -12    1.75    3.86   0
   1  -8 -12   11.85    7.93   0
  -1   8  11    3.72    6.26   0
   1   8 -11    3.40    3.74   0
   1  -8 -11    3.40    6.48   0
   1   8 -10    5.06    4.05   0
  -1   8  10    2.22    6.44   0
   1  -8 -10   -0.26    4.75   0
   1   8  -9    1.29    3.87   0
   1   8  -9    0.76    3.86   0
  -1   8   9    4.23    6.33   0
   1  -8  -9    0.51    4.83   0
  -1   8   8    2.74    4.91   0
   1   8  -8    5.62    4.17   0
   1   8  -8   17.48    5.56   0
   1  -8  -8    3.92    6.28   0
  -1   8   7    0.37    5.12   0
   1   8  -7    4.62    4.14   0
   1  -8  -7   -5.54    3.50   0
   1   8  -6   43.01    8.52   0
  -1   8   6   38.34    9.93   0
   1  -8  -6   57.94   12.03   0
  -1   8   5   -0.40    4.14   0
   1   8  -5    3.41    4.07   0
   1  -8  -5    6.96    5.60   0
  -1   8   4    4.36    4.88   0
   1   8  -4   -1.99    3.45   0
   1  -8  -4    7.43    5.17   0
  -1  -8   4    1.35    2.93   0
   1   8  -3   28.27    7.30   0
  -1   8   3   27.87    8.10   0
   1  -8  -3   35.44    8.74   0
  -1  -8   3   46.47    7.41   0
   1   8  -2   -2.47    3.17   0
  -1   8   2   -0.65    3.13   0
  -1  -8   2    1.30    3.17   0
   1  -8  -2    1.96    4.28   0
   1   8  -1   27.90    7.74   0
  -1   8   1   36.03    8.64   0
   1  -8  -1   38.76    8.38   0
  -1  -8   1   26.23    6.63   0
  -1   8   0   11.40    5.65   0
   1   8   0    4.40    5.18   0
   1  -8   0   17.32    5.71   0
  -1  -8   0   18.47    5.96   0
  -1   8  -1   20.79    6.30   0
   1   8   1   43.80    9.35   0
  -1  -8  -1   38.76    8.51   0
   1  -8   1   31.68    6.95   0
  -1   8  -2   -1.02    3.46   0
   1   8   2    7.43    5.07   0
   1  -8   2    0.07    2.58   0
  -1  -8  -2   -3.51    2.79   0
   1   8   3   -0.15    3.84   0
  -1   8  -3   -1.00    3.26   0
   1  -8   3   -0.46    2.17   0
  -1  -8  -3    1.35    3.95   0
  -1   8  -4   31.35    7.41   0
   1   8   4   34.45    8.92   0
  -1  -8  -4   12.12    6.96   0
  -1   8  -5   43.76    8.26   0
   1   8   5   30.25    9.28   0
  -1  -8  -5   39.93   10.29   0
  -1   8  -6   15.95    5.47   0
   1   8   6   28.71    8.57   0
  -1  -8  -6   24.85    8.58   0
   1   8   7    0.55    4.18   0
  -1   8  -7    1.88    3.46   0
  -1  -8  -7    1.18    4.10   0
   1   8   8   -1.62    5.22   0
  -1   8  -8   -0.37    3.08   0
  -1  -8  -8   -2.43    4.34   0
  -1   8  -9   -4.15    2.88   0
   1   8   9    3.43    6.14   0
  -1  -8  -9   -2.94    4.19   0
  -1   8 -10    3.07    3.49   0
  -1   8 -10    0.54    3.42   0
   1   8  10    2.09    5.92   0
  -1  -8 -10    6.36    6.23   0
   1   8  11    5.54    6.32   0
   1   8  11    7.00    6.27   0
  -1   8 -11    9.11    4.55   0
  -1  -8 -11   10.26    7.75   0
  -1  -8 -12   12.57    7.67   0
  -1   9  11   -1.63    6.13   0
   1   9 -11    3.53    4.42   0
   1  -9 -11    1.43    6.03   0
  -1   9  10   -2.15    6.69   0
   1   9 -10   -3.26    3.75   0
   1  -9 -10    5.32    7.30   0
  -1   9   9   -0.40    5.67   0
   1   9  -9   -1.60    3.47   0
   1   9  -9    2.65    4.36   0
   1  -9  -9    1.37    6.05   0
   1   9  -8    9.27    5.29   0
  -1   9   8   -5.30    5.35   0
   1   9  -8   13.10    6.05   0
   1  -9  -8    4.30    5.98   0
   1   9  -7    7.06    4.81   0
  -1   9   7   -2.27    5.88   0
   1  -9  -7    6.35    6.46   0
   1   9  -6    7.64    5.13   0
  -1   9   6    0.03    4.90   0
   1  -9  -6    2.93    5.58   0
  -1   9   5    4.10    6.17   0
   1   9  -5    2.97    4.37   0
   1  -9  -5    6.58    5.75   0
  -1   9   4   -3.89    4.21   0
   1   9  -4   -0.19    4.22   0
   1  -9  -4    4.88    5.33   0
  -1   9   3   -1.28    4.05   0
   1   9  -3    6.96    5.24   0
   1  -9  -3    3.69    5.37   0
  -1   9   2    2.98    4.15   0
   1   9  -2    6.00    4.83   0
  -1  -9   2    1.34    3.29   0
   1  -9  -2    0.98    4.17   0
   1   9  -1   32.24    8.34   0
  -1   9   1   12.59    6.26   0
  -1  -9   1   25.17    6.78   0
   1  -9  -1   22.82    7.07   0
   1   9   0   -0.80    4.33   0
  -1   9   0    1.13    4.77   0
  -1  -9   0   14.70    5.55   0
   1  -9   0    4.34    4.46   0
   1   9   1   25.20    8.21   0
  -1   9  -1   21.05    7.28   0
  -1  -9  -1   28.60    8.12   0
   1  -9   1   17.30    5.76   0
   1   9   2   11.28    6.33   0
  -1   9  -2    3.36    4.81   0
  -1  -9  -2   17.23    6.67   0
  -1   9  -3    0.53    4.34   0
   1   9   3   -4.14    3.29   0
  -1  -9  -3   -1.41    3.59   0
   1   9   4   62.18   13.26   0
  -1   9  -4   57.96   10.69   0
  -1  -9  -4   51.12   11.21   0
  -1   9  -5    2.06    4.43   0
   1   9   5   -0.11    4.79   0
  -1  -9  -5   -5.13    4.30   0
   1   9   6   11.59    6.96   0
  -1   9  -6   -0.95    3.54   0
  -1  -9  -6    7.69    6.46   0
  -1   9  -7   19.63    6.82   0
   1   9   7   13.59    8.04   0
  -1  -9  -7    8.11    6.68   0
  -1   9  -8    7.09    4.96   0
   1   9   8   18.10    8.73   0
  -1  -9  -8    1.30    5.80   0
   1   9   9    8.74    8.51   0
  -1   9  -9   -0.99    3.77   0
  -1  -9  -9    0.47    5.89   0
   1   9  10    2.65    7.16   0
  -1   9 -10    9.98    5.41   0
  -1   9 -10    3.13    4.27   0
  -1  -9 -10   -1.64    5.16   0
   1  10  -9    7.65    5.45   0
  -1  10   9    0.63    7.21   0
   1 -10  -9    5.27    7.77   0
   1  10  -8   -0.90    4.42   0
  -1  10   8    7.63    7.63   0
   1  10  -8    2.76    5.15   0
   1 -10  -8    7.09    7.08   0
   1  10  -7    6.15    5.57   0
   1  10  -7   11.51    6.40   0
  -1  10   7   -5.20    4.87   0
   1 -10  -7    1.58    5.86   0
   1  10  -6   -0.64    4.31   0
  -1  10   6    1.18    5.23   0
   1 -10  -6    2.86    5.41   0
  -1  10   5   41.14   11.65   0
   1  10  -5   56.09   11.24   0
   1 -10  -5   38.15   10.86   0
   1  10  -4    6.00    5.61   0
  -1  10   4   -1.44    5.42   0
   1 -10  -4    0.09    4.80   0
  -1  10   3   39.69   10.69   0
   1  10  -3   38.80    9.97   0
   1 -10  -3   45.68   11.03   0
   1  10  -2   16.22    7.62   0
  -1  10   2    4.48    5.78   0
   1 -10  -2    7.46    5.54   0
  -1  10   1   14.17    6.99   0
   1  10  -1   -1.78    5.00   0
   1 -10  -1    6.33    4.81   0
   1  10   0    4.26    5.70   0
  -1  10   0    5.94    6.09   0
  -1 -10   0    3.81    4.83   0
   1  10   1   25.97    8.89   0
  -1  10  -1   30.39    9.32   0
  -1 -10  -1   39.70   10.00   0
   1  10   2    5.69    6.18   0
  -1  10  -2    1.90    5.04   0
  -1 -10  -2   -0.27    4.58   0
   1  10   3    9.22    6.56   0
  -1  10  -3   14.94    7.23   0
  -1 -10  -3   15.12    8.02   0
   1  10   4   13.07    7.86   0
  -1  10  -4   19.64    6.92   0
  -1 -10  -4   14.33    7.11   0
  -1  10  -5   17.31    6.71   0
   1  10   5    3.13    5.72   0
  -1 -10  -5   12.17    7.58   0
  -1  10  -6   12.96    6.35   0
   1  10   6   23.78    9.38   0
  -1 -10  -6   -2.22    4.52   0
   1  10   7    8.37    7.19   0
  -1  10  -7    6.17    5.09   0
  -1 -10  -7    4.41    6.82   0
  -1  10  -8    1.98    5.25   0
   1  10   8    0.57    6.73   0
  -1 -10  -8    7.82    7.61   0
   1  11  -6   11.07    7.53   0
  -1  11   6   15.81    9.17   0
   1  11  -6    5.28    6.32   0
   1 -11  -6    5.53    6.56   0
   1  11  -5    2.85    6.38   0
  -1  11   5    9.07    7.09   0
   1 -11  -5    2.19    6.52   0
   1  11  -4   18.04    8.36   0
  -1  11   4   15.78    9.27   0
   1 -11  -4    9.52    6.47   0
  -1  11   3   17.37    8.15   0
   1  11  -3   25.15    9.25   0
   1 -11  -3   31.80   10.17   0
  -1  11   2   -1.50    4.37   0
   1  11  -2    2.65    6.44   0
   1  11  -1   -1.66    5.06   0
  -1  11   1   -7.19    4.98   0
  -1  11   0    4.67    6.38   0
   1  11   0    1.88    4.93   0
  -1  11  -1    0.47    5.73   0
   1  11   1    1.08    5.59   0
  -1  11  -2   21.10    8.19   0
   1  11   2   37.65   11.47   0
  -1 -11  -2   21.98    8.19   0
   1  11   3    1.17    5.94   0
  -1  11  -3    5.75    5.69   0
  -1 -11  -3    4.93    6.12   0
   1  11   4   23.20    9.50   0
  -1  11  -4    5.02    6.37   0
  -1 -11  -4   18.20    9.20   0
   1  11   5   -1.49    6.80   0
  -1  11  -5   -1.39    5.34   0
  -1 -11  -5   18.60    9.00   0
   1  11   6    2.90    8.23   0
  -1  11  -6   12.27    7.13   0
  -1 -11  -6    8.71    6.86   0
   2   0 -17    2.09    4.70   0
   2   0 -16   12.47    6.08   0
   2   0 -15   -1.67    3.69   0
   2   0 -14    5.80    4.17   0
   2   0 -13    4.68    3.75   0
   2   0 -12   30.91    6.46   0
   2   0 -12   41.05    7.21   0
   2   0 -11   -1.06    2.33   0
   2   0 -11    2.18    2.96   0
   2   0 -10   76.04    8.98   0
   2   0 -10   80.82    9.48   0
  -2   0   9   -0.27    0.98   0
   2   0  -9   -0.32    2.35   0
   2   0  -9    2.16    2.40   0
  -2   0   9   -0.02    0.92   0
   2   0  -8    7.69    3.37   0
  -2   0   8    2.51    1.19   0
   2   0  -8   10.44    3.48   0
  -2   0   8    5.85    1.90   0
  -2   0   7    1.35    1.44   0
   2   0  -7    0.27    1.95   0
  -2   0   7   -1.13    1.32   0
   2   0  -7    1.10    2.04   0
   2   0  -6    9.98    2.90   0
   2   0  -6    6.46    2.86   0
  -2   0   6    8.77    2.32   0
  -2   0   6    8.15    2.38   0
  -2   0   5    0.17    1.45   0
   2   0  -5   -0.23    1.78   0
   2   0  -5    3.32    2.16   0
  -2   0   5    2.54    1.73   0
   2   0  -4  937.91   34.47   0
  -2   0   4  975.28   34.12   0
   2   0  -4  984.59   34.57   0
  -2   0   4  972.51   34.04   0
   2   0  -3   -0.41    1.74   0
  -2   0   3    1.92    1.71   0
   2   0  -3    1.61    1.88   0
  -2   0   3    1.24    1.67   0
   2   0  -2 1500.39   49.15   0
  -2   0   2 1457.42   48.93   0
   2   0  -2 1423.84   48.84   0
  -2   0   2 1418.51   48.73   0
   2   0   1   -0.46    0.92   0
  -2   0  -1   -0.55    1.02   0
   2   0   1    0.70    0.97   0
  -2   0  -1    0.33    1.04   0
  -2   0  -2 1336.38   43.11   0
  -2   0  -2 1258.84   42.96   0
   2   0   2 1228.33   42.47   0
   2   0   2 1337.74   42.62   0
   2   0   3    0.93    0.92   0
  -2   0  -3    2.10    1.60   0
  -2   0  -3    1.25    1.40   0
  -2   0  -4  135.04    6.69   0
  -2   0  -4  141.12    6.92   0
  -2   0  -5   -0.98    1.51   0
  -2   0  -5    0.40    1.41   0
  -2   0  -5    1.40    1.50   0
  -2   0  -6    8.60    2.57   0
  -2   0  -6   12.50    2.81   0
  -2   0  -7    2.60    2.13   0
  -2   0  -7   -0.58    1.57   0
  -2   0  -8    4.64    2.57   0
  -2   0  -8    4.45    2.62   0
  -2   0  -9   -0.62    1.95   0
  -2   0  -9    0.46    2.24   0
  -2   0 -10  184.89   11.62   0
  -2   0 -10  197.82   12.05   0
  -2   0 -11   -1.47    2.58   0
  -2   0 -11   -1.59    2.48   0
  -2   0 -12  102.84   11.18   0
  -2   0 -13   -1.69    2.69   0
  -2   0 -14   16.73    5.74   0
  -2   0 -15    0.14    3.67   0
  -2   0 -16    0.39    4.01   0
   2   1 -17    8.57    5.28   0
   2  -1 -17   10.44    7.05   0
   2   1 -16    5.62    4.80   0
   2  -1 -16   26.84    8.53   0
   2   1 -15    6.87    4.59   0
   2  -1 -15    3.79    5.07   0
   2   1 -14    2.50    3.72   0
   2  -1 -14   -0.86    3.98   0
   2   1 -13   78.76    9.98   0
   2  -1 -13   80.60   11.66   0
   2   1 -12    1.72    3.29   0
   2   1 -12    2.42    3.18   0
   2  -1 -12   -0.72    3.10   0
   2   1 -11   20.13    4.77   0
   2   1 -11   32.01    6.02   0
  -2   1  11   12.52    2.58   0
  -2   1  11    8.80    2.31   0
   2  -1 -11   27.98    6.41   0
   2  -1 -11   21.42    5.88   0
  -2   1  10   71.28    5.69   0
   2   1 -10   51.75    7.02   0
   2   1 -10   82.00    8.50   0
   2  -1 -10   71.79    9.37   0
   2  -1 -10   67.59    9.31   0
   2   1  -9  119.70    8.36   0
   2   1  -9  102.69    7.75   0
  -2   1   9  112.92    7.62   0
   2  -1  -9  113.65    9.46   0
   2  -1  -9  113.90    9.54   0
  -2   1   8    4.14    2.39   0
   2   1  -8    3.40    2.40   0
   2   1  -8    3.41    2.30   0
   2  -1  -8    3.40    2.90   0
   2  -1  -8    2.85    3.17   0
  -2   1   7   63.74    6.66   0
  -2   1   7   51.32    6.11   0
   2   1  -7   57.20    5.11   0
   2   1  -7   59.81    5.27   0
   2  -1  -7   50.98    7.01   0
   2  -1  -7   57.52    7.24   0
   2   1  -6   51.33    5.35   0
  -2   1   6   68.24    5.81   0
   2   1  -6   54.59    4.83   0
  -2   1   6   68.74    5.77   0
   2  -1  -6   58.77    7.32   0
   2  -1  -6   69.04    7.62   0
  -2   1   5   85.85    6.46   0
   2   1  -5   81.20    5.67   0
  -2   1   5   83.89    6.44   0
   2   1  -5   88.35    5.67   0
   2  -1  -5   81.54    6.83   0
  -2  -1   5   87.20    4.37   0
   2  -1  -5   95.46    7.04   0
   2   1  -4   46.81    4.12   0
  -2   1   4   54.19    5.82   0
   2   1  -4   45.52    4.04   0
  -2   1   4   39.06    4.91   0
   2  -1  -4   61.08    6.49   0
  -2  -1   4   46.11    3.40   0
   2  -1  -4   47.16    5.77   0
  -2  -1   4   42.11    3.27   0
  -2   1   3  361.54   15.60   0
  -2   1   3  396.89   16.07   0
   2   1  -3  390.10   14.85   0
   2   1  -3  345.47   14.53   0
   2  -1  -3  383.30   16.07   0
  -2  -1   3  383.03   14.37   0
   2  -1  -3  369.59   15.92   0
  -2  -1   3  366.56   14.19   0
   2   1  -2  491.10   17.90   0
  -2   1   2  449.91   18.44   0
   2   1  -2  495.13   17.95   0
  -2  -1   2  484.75   17.73   0
  -2  -1   2  474.07   17.62   0
   2  -1  -2  460.83   18.61   0
   2   1  -1  718.85   24.24   0
  -2   1   1  676.97   24.28   0
   2   1  -1  624.85   23.84   0
  -2   1   1  658.36   24.30   0
  -2  -1   1  684.18   24.08   0
   2  -1  -1  645.28   24.11   0
  -2  -1   1  672.73   23.97   0
   2  -1  -1  669.78   24.26   0
  -2   1   0    6.28    1.77   0
  -2   1   0    7.69    1.72   0
   2   1   0    9.13    2.14   0
   2   1   0   12.82    2.42   0
  -2  -1   0    7.20    2.08   0
  -2  -1   0    8.99    2.33   0
   2  -1   0    7.50    1.76   0
   2  -1   0    7.73    1.75   0
  -2   1  -1  465.31   16.73   0
   2   1   1  491.53   18.32   0
  -2   1  -1  458.02   16.75   0
   2   1   1  500.61   18.36   0
   2  -1   1  462.86   16.39   0
  -2  -1  -1  495.79   18.34   0
  -2  -1  -1  494.75   18.33   0
  -2  -1  -1  471.94   18.35   0
  -2   1  -2    4.34    0.82   0
  -2   1  -2    6.15    0.84   0
   2   1   2    7.56    2.30   0
   2   1   2    6.80    2.36   0
  -2  -1  -2    5.37    2.15   0
  -2  -1  -2    8.95    2.71   0
  -2  -1  -2    8.65    2.38   0
   2   1   3  233.72   10.70   0
   2   1   3  226.12   10.59   0
  -2  -1  -3  239.85   11.29   0
  -2  -1  -3  234.39   11.08   0
   2   1   4   85.94    5.71   0
   2   1   4   89.57    5.88   0
  -2  -1  -4   84.51    6.38   0
  -2  -1  -4   96.37    6.53   0
   2   1   5  142.11    7.74   0
   2   1   5  144.54    7.71   0
  -2  -1  -5  141.91    8.86   0
  -2  -1  -5  142.45    8.65   0
   2   1   6   12.83    2.85   0
  -2   1  -6   13.65    1.78   0
  -2   1  -6   12.50    1.83   0
   2   1   6    8.69    2.47   0
  -2  -1  -6    7.80    3.13   0
  -2  -1  -6   11.17    3.21   0
  -2   1  -7   30.97    3.34   0
  -2   1  -7   23.87    2.90   0
   2   1   7   24.51    3.46   0
   2   1   7   24.89    3.48   0
  -2  -1  -7   27.55    5.12   0
  -2  -1  -7   28.06    5.13   0
  -2   1  -8  167.07    8.61   0
   2   1   8  180.81    8.32   0
  -2   1  -8  179.84    8.88   0
  -2  -1  -8  203.69   12.16   0
  -2  -1  -8  196.94   11.73   0
  -2   1  -9   70.20    5.49   0
  -2   1  -9   56.18    5.06   0
  -2  -1  -9   64.41    8.28   0
  -2  -1  -9   66.90    8.25   0
  -2   1 -10    0.41    1.90   0
  -2   1 -10    2.34    2.36   0
  -2  -1 -10    2.06    3.19   0
  -2  -1 -10    1.25    2.93   0
  -2   1 -11   94.01    7.59   0
  -2   1 -11   97.83    7.69   0
  -2  -1 -11   95.85   11.16   0
  -2  -1 -11   96.42   11.06   0
  -2   1 -12   29.15    5.43   0
  -2  -1 -12   40.96    7.68   0
  -2   1 -13   23.85    5.40   0
  -2  -1 -13   28.21    6.98   0
  -2   1 -14   12.54    4.61   0
  -2  -1 -14    4.60    4.44   0
  -2   1 -15   17.19    5.67   0
  -2  -1 -15    7.33    5.10   0
  -2   1 -16    5.31    4.06   0
  -2  -1 -16    4.76    5.62   0
   2   2 -17    1.91    3.79   0
   2  -2 -17    0.34    5.32   0
   2   2 -16   37.09    7.59   0
   2  -2 -16   21.44    8.55   0
   2   2 -15    3.27    3.54   0
   2  -2 -15   -2.46    4.63   0
   2   2 -14    9.74    4.59   0
   2  -2 -14   10.81    5.56   0
   2   2 -13    1.55    2.86   0
   2  -2 -13   -2.76    3.69   0
   2   2 -12    2.94    2.81   0
  -2   2  12   16.32    3.93   0
   2   2 -12    7.40    3.31   0
   2  -2 -12    8.57    5.32   0
  -2   2  11    0.78    2.41   0
   2   2 -11    0.75    2.25   0
   2   2 -11    3.92    2.89   0
   2  -2 -11    1.68    3.65   0
   2   2 -10   82.20    6.74   0
  -2   2  10   82.44    8.91   0
   2   2 -10   74.95    6.68   0
   2  -2 -10   85.79   11.07   0
   2   2  -9   13.49    3.43   0
  -2   2   9   12.23    3.98   0
   2   2  -9   12.26    3.34   0
   2  -2  -9    5.67    3.87   0
  -2   2   8   79.57    8.47   0
   2   2  -8   59.19    5.32   0
   2   2  -8   59.91    5.33   0
   2  -2  -8   71.21    9.32   0
   2  -2  -8   71.00    9.15   0
   2   2  -7   77.19    5.82   0
   2   2  -7   77.00    5.80   0
  -2   2   7   98.69    9.94   0
   2  -2  -7   80.01    9.59   0
   2  -2  -7   75.54    9.14   0
   2   2  -6  560.53   21.64   0
   2   2  -6  549.19   21.56   0
  -2   2   6  557.90   24.26   0
   2  -2  -6  593.10   25.14   0
   2  -2  -6  549.79   24.93   0
  -2   2   5  552.64   23.78   0
   2   2  -5  540.96   21.02   0
   2   2  -5  552.67   21.07   0
  -2   2   5  528.52   23.35   0
   2  -2  -5  568.71   24.05   0
   2  -2  -5  563.43   24.21   0
  -2   2   4  379.60   17.73   0
   2   2  -4  427.49   16.04   0
  -2   2   4  397.58   18.22   0
   2   2  -4  398.88   15.86   0
  -2  -2   4  390.42   14.31   0
   2  -2  -4  340.14   17.61   0
   2  -2  -4  404.32   18.24   0
  -2   2   3 2305.28   81.91   0
  -2   2   3 2304.75   81.56   0
   2   2  -3 2447.09   79.95   0
   2   2  -3 2391.73   79.83   0
   2  -2  -3 2321.32   81.85   0
   2  -2  -3 2458.31   82.01   0
  -2  -2   3 2492.26   79.04   0
  -2  -2   3 2417.72   79.10   0
  -2   2   2  337.47   15.35   0
   2   2  -2  325.81   14.04   0
   2   2  -2  337.74   14.17   0
   2   2  -2  313.64   13.93   0
  -2   2   2  358.84   15.31   0
   2  -2  -2  357.11   15.33   0
   2  -2  -2  333.89   15.15   0
  -2  -2   2  331.30   13.86   0
  -2  -2   2  322.10   13.61   0
   2   2  -1   20.29    3.48   0
  -2   2   1   27.46    4.21   0
   2   2  -1   21.60    3.71   0
  -2   2   1   19.68    3.63   0
   2   2  -1   21.62    3.65   0
   2  -2  -1   22.10    3.60   0
  -2  -2   1   27.83    3.89   0
  -2  -2   1   20.28    3.62   0
   2  -2  -1   28.43    4.33   0
   2   2   0  447.25   17.85   0
   2   2   0  433.76   17.70   0
  -2   2   0  419.72   17.05   0
  -2   2   0  442.65   17.32   0
   2   2   0  415.42   17.62   0
   2  -2   0  404.57   16.73   0
   2  -2   0  403.97   16.79   0
  -2  -2   0  473.26   17.94   0
  -2  -2   0  437.15   17.84   0
  -2   2  -1    0.73    1.61   0
   2   2   1    1.32    2.15   0
  -2   2  -1   -1.02    1.52   0
   2   2   1   -1.41    2.25   0
  -2  -2  -1   -1.23    2.30   0
   2  -2   1   -0.59    1.30   0
   2  -2   1    1.76    1.39   0
  -2  -2  -1    1.25    2.16   0
  -2   2  -2  213.09    8.70   0
   2   2   2  206.03   11.07   0
   2   2   2  215.12   11.18   0
  -2   2  -2  212.86    8.60   0
  -2  -2  -2  208.23   11.39   0
  -2  -2  -2  227.63   11.40   0
   2   2   3   40.84    5.67   0
   2   2   3   31.88    4.95   0
   2   2   3   45.77    5.86   0
  -2  -2  -3   28.55    5.08   0
  -2  -2  -3   42.15    5.64   0
   2   2   4   36.07    5.37   0
   2   2   4   31.22    5.05   0
   2   2   4   34.12    5.30   0
  -2  -2  -4   26.55    4.93   0
  -2  -2  -4   35.91    5.54   0
   2   2   5   76.73    6.65   0
   2   2   5   80.78    6.67   0
   2   2   5   82.06    6.89   0
  -2  -2  -5   88.34    7.45   0
  -2  -2  -5   87.89    9.08   0
   2   2   6   47.65    6.15   0
  -2  -2  -6   34.43    6.28   0
  -2  -2  -6   40.51    6.47   0
   2   2   7   -2.40    1.57   0
  -2  -2  -7    2.59    3.08   0
  -2  -2  -7   -1.42    2.12   0
   2   2   8   11.32    3.49   0
  -2  -2  -8   16.89    4.98   0
  -2  -2  -8   14.83    4.72   0
   2   2   9  143.92    9.19   0
  -2   2  -9  147.35    6.86   0
  -2   2  -9  146.25    6.93   0
  -2  -2  -9  149.22   11.71   0
  -2  -2  -9  156.28   12.19   0
   2   2  10  261.05   12.79   0
  -2   2 -10  251.14   11.22   0
  -2   2 -10  253.96   11.29   0
  -2  -2 -10  250.40   16.57   0
  -2   2 -11   15.21    3.24   0
  -2   2 -11   12.47    3.19   0
  -2  -2 -11   10.31    5.11   0
  -2   2 -12   -3.48    1.93   0
  -2  -2 -12    1.01    3.86   0
  -2   2 -13   11.74    3.54   0
  -2  -2 -13    5.75    5.00   0
  -2   2 -14    5.64    3.40   0
  -2  -2 -14    5.08    5.09   0
  -2   2 -15   -0.43    3.20   0
  -2  -2 -15    7.74    5.49   0
  -2   2 -16    0.87    3.49   0
  -2  -2 -16   -1.18    5.02   0
   2   3 -16   23.14    5.98   0
   2  -3 -16   10.80    7.49   0
   2   3 -15    2.08    3.29   0
   2  -3 -15   -0.35    4.67   0
   2   3 -14    1.26    2.98   0
   2  -3 -14   -6.29    3.37   0
   2   3 -13    4.40    3.12   0
   2  -3 -13    2.50    5.14   0
  -2   3  12    8.28    3.99   0
   2   3 -12    6.21    2.81   0
   2  -3 -12    4.04    5.29   0
   2   3 -11    3.32    2.65   0
  -2   3  11    3.06    3.40   0
   2   3 -11    0.26    2.23   0
   2  -3 -11    1.04    3.77   0
  -2   3  10    2.87    3.22   0
   2   3 -10    6.36    2.58   0
   2   3 -10    1.85    2.06   0
   2  -3 -10    1.33    3.94   0
  -2   3   9  100.03   11.01   0
   2   3  -9   89.22    6.81   0
   2   3  -9   95.12    7.05   0
   2  -3  -9  110.31   13.40   0
  -2   3   8   16.80    4.79   0
   2   3  -8   12.13    3.03   0
   2   3  -8   14.73    3.26   0
   2  -3  -8    2.89    3.82   0
   2   3  -7    1.56    1.93   0
  -2   3   7   -1.16    2.42   0
   2   3  -7    1.69    1.95   0
   2  -3  -7    1.55    3.56   0
   2   3  -6   53.25    5.67   0
   2   3  -6   54.43    5.75   0
  -2   3   6   49.61    7.60   0
   2  -3  -6   51.73    8.13   0
   2   3  -5  656.77   25.30   0
  -2   3   5  685.79   28.97   0
   2   3  -5  644.63   25.26   0
   2  -3  -5  606.89   35.67   0
   2  -3  -5  698.98   29.55   0
  -2   3   4  222.81   13.77   0
   2   3  -4  229.38   11.64   0
   2   3  -4  265.24   12.04   0
   2   3  -4  249.16   11.82   0
   2  -3  -4  239.95   14.07   0
  -2  -3   4  236.87   10.06   0
  -2  -3   4  241.46   10.04   0
   2  -3  -4  217.63   13.42   0
  -2   3   3  252.61   14.05   0
   2   3  -3  279.75   12.88   0
  -2   3   3  252.89   14.36   0
   2   3  -3  279.55   12.76   0
   2  -3  -3  249.64   14.29   0
   2  -3  -3  244.57   13.88   0
  -2  -3   3  274.07   11.90   0
  -2  -3   3  251.19   11.55   0
  -2   3   2   46.76    6.30   0
   2   3  -2   48.39    5.84   0
   2   3  -2   52.81    6.22   0
  -2   3   2   51.51    6.57   0
   2  -3  -2   62.30    7.34   0
   2  -3  -2   64.25    7.29   0
  -2  -3   2   62.95    6.21   0
  -2  -3   2   54.82    5.79   0
  -2   3   1  880.89   34.12   0
  -2   3   1  968.87   34.23   0
   2   3  -1  884.65   33.30   0
   2   3  -1  843.59   33.22   0
   2  -3  -1  872.02   33.52   0
   2  -3  -1  889.31   33.38   0
  -2  -3   1  835.58   32.76   0
  -2  -3   1  888.46   33.11   0
   2   3   0   57.82    6.65   0
   2   3   0   54.27    6.46   0
  -2   3   0   42.19    5.52   0
  -2   3   0   42.26    5.48   0
   2  -3   0   42.64    5.31   0
  -2  -3   0   56.17    6.31   0
  -2  -3   0   67.47    7.16   0
   2  -3   0   55.09    5.80   0
  -2   3  -1  138.56    8.39   0
   2   3   1  148.57    9.65   0
  -2   3  -1  144.34    8.35   0
   2   3   1  140.72    9.27   0
  -2  -3  -1  155.05    9.76   0
   2  -3   1  138.28    7.55   0
  -2  -3  -1  152.78    9.43   0
   2  -3   1  135.91    7.53   0
   2   3   2  114.82    8.36   0
  -2   3  -2  104.46    6.38   0
  -2   3  -2  111.59    6.76   0
   2   3   2  106.69    8.44   0
  -2  -3  -2  100.10    8.55   0
  -2  -3  -2  116.88    8.43   0
   2  -3   2  105.57    5.11   0
  -2   3  -3    2.91    1.69   0
   2   3   3    5.57    2.96   0
   2   3   3    0.06    2.14   0
  -2   3  -3    0.21    1.41   0
  -2  -3  -3   -0.07    2.16   0
  -2  -3  -3    1.73    2.69   0
   2   3   4    9.85    3.71   0
  -2   3  -4   11.21    1.85   0
  -2   3  -4    7.10    1.55   0
  -2  -3  -4    6.26    3.44   0
  -2  -3  -4    1.73    3.49   0
   2   3   5    5.63    3.29   0
  -2  -3  -5    3.22    3.23   0
  -2  -3  -5    1.74    3.13   0
   2   3   6    9.06    3.69   0
   2   3   6   11.31    4.03   0
  -2  -3  -6   10.48    4.05   0
   2   3   7   20.13    4.92   0
   2   3   7   22.04    5.03   0
  -2  -3  -7    5.34    3.60   0
   2   3   8    1.22    2.73   0
   2   3   8   -1.48    2.39   0
  -2  -3  -8   -2.14    2.84   0
   2   3   9  135.34   10.33   0
  -2  -3  -9  146.60   12.53   0
   2   3  10  250.50   14.77   0
  -2  -3 -10  264.69   17.98   0
   2   3  11    2.87    2.75   0
  -2   3 -11    3.18    1.52   0
  -2   3 -11    2.01    1.56   0
  -2  -3 -11    6.64    4.79   0
  -2   3 -12   12.84    2.82   0
  -2  -3 -12   17.64    6.77   0
  -2   3 -13    1.84    2.18   0
  -2  -3 -13   -3.28    3.74   0
  -2   3 -14   11.04    3.39   0
  -2  -3 -14   12.69    7.01   0
  -2  -3 -15   11.07    6.78   0
  -2  -3 -16    2.54    5.85   0
   2   4 -16   -0.54    3.36   0
   2  -4 -16    2.80    6.35   0
   2   4 -15    2.37    3.43   0
   2  -4 -15    1.69    5.52   0
   2   4 -14    2.17    3.11   0
   2  -4 -14    3.11    5.39   0
   2   4 -13    2.03    2.82   0
   2  -4 -13   -3.29    4.19   0
  -2   4  12    1.99    3.86   0
   2   4 -12   -0.71    2.30   0
   2  -4 -12    5.96    5.44   0
   2   4 -11    0.62    2.54   0
  -2   4  11    1.94    3.62   0
   2   4 -11    1.12    2.61   0
   2  -4 -11   -0.19    4.22   0
  -2   4  10    0.99    3.62   0
   2   4 -10    1.67    2.19   0
   2   4 -10    0.82    2.09   0
   2  -4 -10    1.49    3.73   0
   2   4  -9   -1.34    2.04   0
  -2   4   9   -0.09    3.15   0
   2   4  -9    2.46    2.26   0
   2  -4  -9    0.48    3.88   0
   2   4  -8   57.48    6.61   0
  -2   4   8   77.81   10.57   0
   2   4  -8   57.64    6.71   0
   2  -4  -8   69.11   11.09   0
  -2   4   7   26.09    6.50   0
   2   4  -7   24.98    4.38   0
   2   4  -7   26.02    4.55   0
   2  -4  -7   30.14    6.99   0
   2   4  -6   59.73    6.67   0
   2   4  -6   59.07    6.60   0
  -2   4   6   51.80    8.43   0
   2   4  -6   57.87    6.53   0
   2  -4  -6   47.43    8.65   0
   2   4  -5 1098.62   40.31   0
   2   4  -5 1114.97   40.53   0
  -2   4   5 1057.10   44.07   0
   2   4  -5 1080.31   40.36   0
   2  -4  -5 1092.65   44.72   0
  -2  -4   5 1074.18   35.75   0
   2   4  -4 2325.85   78.03   0
  -2   4   4 2310.27   81.67   0
   2   4  -4 2228.40   77.90   0
  -2  -4   4 2214.49   75.46   0
  -2  -4   4 2273.06   75.42   0
   2  -4  -4 2161.19   81.23   0
   2   4  -3  359.14   16.81   0
  -2   4   3  339.29   18.60   0
   2   4  -3  338.86   16.34   0
  -2  -4   3  366.47   15.54   0
  -2  -4   3  324.75   15.25   0
   2  -4  -3  337.42   18.42   0
   2   4  -2    4.04    2.69   0
  -2   4   2    4.50    3.62   0
  -2   4   2    0.73    2.82   0
   2   4  -2    6.07    3.03   0
  -2  -4   2    1.47    2.29   0
   2  -4  -2    4.28    3.30   0
  -2  -4   2    5.93    2.60   0
  -2   4   1  355.40   17.54   0
   2   4  -1  357.51   17.21   0
  -2   4   1  340.07   17.85   0
   2   4  -1  344.70   17.34   0
   2  -4  -1  352.83   18.41   0
  -2  -4   1  356.25   16.72   0
   2  -4  -1  315.10   16.83   0
  -2  -4   1  347.13   16.88   0
   2   4   0  190.91   11.97   0
  -2   4   0  212.02   12.45   0
  -2   4   0  215.51   12.07   0
   2   4   0  191.38   12.27   0
   2  -4   0  200.14   11.29   0
  -2  -4   0  173.49   11.65   0
   2  -4   0  193.25   10.83   0
  -2   4  -1   38.44    5.70   0
  -2   4  -1   50.76    6.65   0
   2   4   1   31.28    5.89   0
   2   4   1   54.01    7.42   0
   2  -4   1   55.81    6.17   0
  -2  -4  -1   55.70    7.60   0
   2  -4   1   58.22    6.06   0
   2   4   2  133.45   10.48   0
  -2   4  -2  162.07    9.64   0
  -2   4  -2  145.02    8.99   0
   2  -4   2  147.89    7.60   0
  -2  -4  -2  138.83   10.89   0
   2  -4   2  145.02    7.62   0
   2   4   3   16.42    4.92   0
  -2   4  -3   13.96    3.26   0
  -2   4  -3   10.43    3.08   0
  -2  -4  -3   10.97    4.00   0
  -2   4  -4   66.64    5.31   0
   2   4   4   74.45    9.55   0
  -2   4  -4   68.65    5.13   0
  -2  -4  -4   65.25    9.27   0
  -2   4  -5   40.53    4.34   0
   2   4   5   44.98    7.63   0
  -2   4  -5   42.39    3.77   0
  -2  -4  -5   38.28    7.74   0
  -2   4  -6   10.12    2.05   0
  -2   4  -6   12.98    2.31   0
   2   4   6   13.75    4.80   0
  -2  -4  -6   11.19    4.60   0
   2   4   7   21.71    6.10   0
  -2   4  -7   17.69    2.33   0
  -2   4  -7   16.40    2.14   0
  -2  -4  -7   11.08    5.23   0
   2   4   8   80.94   10.30   0
   2   4   8   96.74   11.39   0
  -2  -4  -8  118.46   14.38   0
   2   4   9   19.64    5.71   0
   2   4   9   14.03    5.04   0
  -2  -4  -9   20.62    6.88   0
   2   4  10  163.60   12.66   0
  -2  -4 -10  171.32   18.85   0
   2   4  11   27.56    6.30   0
  -2  -4 -11   14.68    6.76   0
  -2   4 -12    3.35    1.62   0
  -2  -4 -12    0.44    3.70   0
  -2   4 -13   10.54    2.46   0
  -2  -4 -13    8.07    6.09   0
  -2  -4 -14   -5.40    4.48   0
  -2  -4 -15    9.76    7.46   0
   2   5 -15    2.29    3.23   0
   2  -5 -15    5.26    6.94   0
   2   5 -14    0.29    2.92   0
   2  -5 -14    2.22    5.87   0
   2   5 -13   13.56    4.26   0
   2  -5 -13    7.58    6.84   0
   2   5 -12   -1.61    2.41   0
  -2   5  12   -3.11    3.47   0
   2  -5 -12    0.38    3.84   0
   2   5 -11    0.83    2.54   0
  -2   5  11    5.10    4.51   0
   2  -5 -11   -3.53    3.09   0
   2   5 -10    2.55    2.73   0
   2   5 -10    1.61    2.43   0
  -2   5  10    2.48    3.91   0
   2  -5 -10    2.94    4.00   0
   2   5  -9   63.11    7.61   0
  -2   5   9   59.16    9.99   0
   2   5  -9   53.15    7.24   0
   2  -5  -9   64.60   11.49   0
   2   5  -8    3.66    2.86   0
  -2   5   8   -1.81    3.28   0
   2   5  -8    7.25    2.86   0
   2  -5  -8    1.80    3.54   0
   2   5  -7    7.86    3.23   0
   2   5  -7   10.07    3.38   0
  -2   5   7    7.30    4.32   0
   2  -5  -7   11.33    5.27   0
  -2   5   6  171.28   13.83   0
   2   5  -6  147.77   10.11   0
   2   5  -6  151.81   10.33   0
   2   5  -6  166.38   10.79   0
   2  -5  -6  124.59   15.10   0
   2   5  -5   78.01    8.62   0
  -2   5   5   56.16    9.32   0
   2   5  -5   69.63    8.22   0
  -2  -5   5   64.31    4.17   0
   2  -5  -5   68.63   10.30   0
   2   5  -4   58.16    7.74   0
  -2   5   4   68.12    9.71   0
   2   5  -4   75.42    8.36   0
   2  -5  -4   73.01   10.02   0
  -2  -5   4   63.43    5.36   0
  -2  -5   4   74.60    5.87   0
   2   5  -3  200.02   12.52   0
  -2   5   3  196.49   14.22   0
   2   5  -3  188.89   12.38   0
  -2  -5   3  212.84   11.61   0
   2  -5  -3  192.87   13.65   0
   2   5  -2   76.58    9.28   0
   2   5  -2   98.29   10.46   0
  -2   5   2   95.65   11.20   0
  -2  -5   2   99.41    8.07   0
   2  -5  -2  120.52   12.61   0
   2   5  -1   28.80    6.07   0
  -2   5   1   29.97    6.41   0
   2   5  -1   38.24    6.78   0
   2  -5  -1   37.10    6.53   0
  -2  -5   1   45.69    7.15   0
  -2   5   0    8.21    3.97   0
  -2   5   0   10.16    3.72   0
   2   5   0    7.59    3.44   0
  -2  -5   0    5.99    3.56   0
   2  -5   0   11.37    3.68   0
   2   5   1   34.99    6.68   0
  -2   5  -1   23.56    5.51   0
  -2   5  -1   26.45    5.51   0
   2  -5   1   27.84    4.98   0
  -2  -5  -1   31.41    6.79   0
  -2   5  -2   15.82    4.33   0
  -2   5  -2    6.57    3.20   0
   2   5   2   12.61    4.83   0
  -2  -5  -2   10.25    4.13   0
   2  -5   2    4.36    2.33   0
   2  -5   2    8.23    2.73   0
  -2   5  -3    1.18    2.17   0
   2   5   3   -2.09    2.09   0
  -2   5  -3    1.20    2.32   0
   2  -5   3   -0.44    0.60   0
  -2  -5  -3    4.13    3.71   0
   2  -5   3    4.11    1.45   0
   2   5   4    2.29    3.32   0
  -2   5  -4    5.89    2.68   0
  -2   5  -4    6.13    2.86   0
  -2  -5  -4    9.43    4.52   0
   2   5   5   45.88    8.13   0
  -2   5  -5   45.60    5.79   0
  -2   5  -5   42.37    5.44   0
  -2  -5  -5   57.28    9.82   0
  -2   5  -6    3.73    2.31   0
   2   5   6    2.01    3.62   0
  -2   5  -6   -0.69    1.63   0
  -2  -5  -6    4.71    3.79   0
   2   5   7   24.33    6.71   0
  -2   5  -7   20.41    3.58   0
  -2   5  -7   29.49    4.20   0
  -2  -5  -7    9.85    5.01   0
  -2   5  -8  109.94    6.63   0
  -2   5  -8  104.35    6.66   0
   2   5   8  130.81   14.55   0
  -2  -5  -8  126.81   15.99   0
  -2   5  -9   77.83    5.19   0
  -2   5  -9   83.65    5.39   0
   2   5   9   86.03   11.42   0
   2   5   9   61.53   10.26   0
  -2  -5  -9   68.63   12.27   0
   2   5  10   11.79    5.48   0
   2   5  10   26.89    6.94   0
  -2   5 -10   18.39    2.91   0
  -2   5 -10   17.91    3.03   0
  -2  -5 -10   20.44    7.77   0
   2   5  11   -0.06    3.14   0
  -2   5 -11    0.86    1.53   0
  -2  -5 -11    3.07    4.93   0
  -2   5 -12    1.61    1.65   0
  -2  -5 -12    0.43    5.25   0
  -2  -5 -13   12.46    7.64   0
  -2  -5 -14   -3.49    5.31   0
  -2  -5 -15    2.57    6.31   0
   2  -6 -15   12.65    9.45   0
   2   6 -14    8.19    4.16   0
   2  -6 -14   -0.41    6.46   0
   2   6 -13   -0.72    2.78   0
   2  -6 -13   -0.68    4.74   0
  -2   6  12   -0.11    4.57   0
   2   6 -12    3.53    3.28   0
   2  -6 -12    1.44    4.81   0
  -2   6  11    9.61    5.84   0
   2   6 -11   16.70    4.81   0
   2  -6 -11   10.60    6.59   0
   2   6 -10   -0.24    2.63   0
  -2   6  10    1.25    4.28   0
   2  -6 -10    3.21    4.57   0
  -2   6   9   17.81    6.89   0
   2   6  -9   10.50    4.27   0
   2  -6  -9    7.35    5.86   0
   2   6  -8   63.27    8.34   0
   2   6  -8   47.91    7.27   0
  -2   6   8   56.92   10.33   0
   2  -6  -8   71.45   12.49   0
   2   6  -7   12.08    4.00   0
   2   6  -7    5.13    3.38   0
   2   6  -7    7.47    3.65   0
  -2   6   7    7.21    5.03   0
   2  -6  -7    0.73    3.54   0
  -2   6   6  189.73   15.81   0
   2   6  -6  219.66   13.17   0
   2   6  -6  191.94   13.01   0
   2  -6  -6  161.71   15.14   0
  -2   6   5  122.01   15.10   0
   2   6  -5   93.81   10.82   0
   2   6  -5   98.88   10.76   0
  -2  -6   5   90.74    5.83   0
   2  -6  -5   82.57   11.97   0
  -2   6   4  143.34   15.87   0
   2   6  -4  114.39   10.05   0
   2   6  -4  106.12   11.67   0
  -2  -6   4  113.96    8.03   0
   2  -6  -4   97.11   13.19   0
  -2   6   3   -0.23    2.86   0
   2   6  -3   -0.56    2.54   0
   2  -6  -3   -3.09    2.56   0
  -2  -6   3   -0.53    2.08   0
  -2   6   2    0.06    3.12   0
   2   6  -2    0.07    2.90   0
  -2  -6   2    5.48    3.36   0
   2  -6  -2    2.18    3.42   0
  -2   6   1    8.11    4.86   0
   2   6  -1    4.21    3.52   0
   2  -6  -1    6.84    3.86   0
  -2  -6   1    9.56    4.28   0
  -2   6   0   96.36   11.52   0
   2   6   0  105.63   12.27   0
   2  -6   0  108.39    9.20   0
  -2  -6   0   99.69   11.32   0
   2   6   1    0.42    2.97   0
  -2   6  -1   -0.37    2.63   0
   2  -6   1   -1.92    1.76   0
  -2  -6  -1    7.00    3.72   0
  -2   6  -2   20.72    5.27   0
   2   6   2   29.15    7.34   0
  -2   6  -2   19.50    5.30   0
  -2  -6  -2   16.05    5.44   0
   2  -6   2   18.87    4.15   0
  -2   6  -3  114.11    9.69   0
   2   6   3   76.42   11.19   0
  -2   6  -3  131.81    9.99   0
   2  -6   3  117.38    6.90   0
   2  -6   3  113.31    6.80   0
  -2  -6  -3  111.48   13.66   0
  -2   6  -4    5.44    3.26   0
   2   6   4    8.28    4.95   0
  -2   6  -4   12.50    4.20   0
  -2  -6  -4    4.47    3.87   0
  -2   6  -5  209.47   12.69   0
  -2   6  -5  204.79   12.50   0
   2   6   5  201.22   15.73   0
  -2  -6  -5  227.80   17.31   0
  -2   6  -6    1.77    2.49   0
   2   6   6    5.63    4.92   0
  -2   6  -6    7.24    3.28   0
  -2  -6  -6   11.98    5.72   0
  -2   6  -7   67.07    7.57   0
   2   6   7   77.35   12.10   0
  -2   6  -7   73.81    7.85   0
  -2  -6  -7   65.96   11.58   0
  -2   6  -8    2.43    2.56   0
   2   6   8   -5.43    3.45   0
  -2   6  -8   -0.35    2.05   0
  -2  -6  -8    1.13    4.23   0
  -2   6  -9    0.30    2.22   0
   2   6   9    0.28    4.11   0
   2   6   9    5.95    4.56   0
  -2  -6  -9   -2.38    3.77   0
   2   6  10   57.66   10.69   0
   2   6  10   40.25    9.10   0
  -2   6 -10   50.61    5.77   0
  -2  -6 -10   22.61    8.03   0
   2   6  11    8.84    5.48   0
  -2   6 -11   10.92    3.04   0
   2   6  11   22.09    7.38   0
  -2  -6 -11    8.18    6.10   0
  -2  -6 -12   12.20    7.22   0
  -2  -6 -13    3.38    5.75   0
  -2  -6 -14   -3.85    4.05   0
   2  -7 -14    0.63    5.98   0
   2   7 -13    4.17    4.14   0
   2  -7 -13   12.02    8.01   0
   2   7 -12    8.10    4.30   0
  -2   7  12    8.84    6.36   0
   2  -7 -12    1.34    5.50   0
  -2   7  11    9.99    6.99   0
   2   7 -11    1.84    3.57   0
   2  -7 -11    2.18    5.85   0
  -2   7  10   -2.87    4.94   0
   2   7 -10    0.65    3.11   0
   2  -7 -10   -3.43    4.55   0
  -2   7   9   -3.11    4.16   0
   2   7  -9   -1.91    2.73   0
   2  -7  -9   -0.98    4.62   0
   2   7  -8    5.94    3.95   0
   2   7  -8    6.58    4.24   0
  -2   7   8   -4.69    4.16   0
   2  -7  -8   11.17    6.56   0
   2   7  -7    5.73    4.06   0
  -2   7   7   -0.54    3.59   0
   2   7  -7    3.40    3.72   0
   2  -7  -7    7.10    5.71   0
   2   7  -6   15.28    5.35   0
   2   7  -6    9.36    4.62   0
  -2   7   6    7.02    5.08   0
   2  -7  -6   17.86    6.90   0
  -2   7   5   33.97    8.64   0
   2   7  -5   28.78    6.93   0
  -2  -7   5   33.62    4.51   0
   2  -7  -5   23.09    7.55   0
  -2   7   4   12.63    5.76   0
   2   7  -4   11.51    4.86   0
  -2  -7   4   13.98    3.92   0
   2  -7  -4   17.41    7.10   0
   2   7  -3    5.87    4.10   0
  -2   7   3    5.87    4.74   0
   2  -7  -3   -4.85    1.95   0
  -2  -7   3   -0.43    2.28   0
   2   7  -2   63.21    9.89   0
  -2   7   2   66.55   10.51   0
  -2  -7   2   62.33    8.84   0
   2  -7  -2   56.66    9.69   0
   2   7  -1   93.00   12.18   0
  -2   7   1   80.11   11.71   0
  -2  -7   1   82.93   10.79   0
   2  -7  -1   83.48   11.00   0
  -2   7   0   35.58    8.29   0
   2   7   0   35.23    7.84   0
  -2  -7   0   28.89    7.00   0
   2  -7   0   39.72    7.41   0
  -2   7  -1   -0.56    3.65   0
   2   7   1    3.84    3.90   0
  -2  -7  -1    0.25    2.98   0
   2  -7   1   -2.21    1.95   0
   2   7   2   45.28    9.38   0
  -2   7  -2   57.79    9.49   0
   2  -7   2   66.35    7.82   0
  -2  -7  -2   64.49   10.98   0
  -2   7  -3   18.16    5.76   0
   2   7   3   16.85    6.30   0
   2  -7   3   13.31    3.17   0
  -2  -7  -3    8.06    5.53   0
   2   7   4   51.92   10.46   0
  -2   7  -4   46.57    7.87   0
  -2   7  -4   36.30    7.30   0
  -2  -7  -4   42.29    9.73   0
  -2   7  -5    0.64    2.89   0
  -2   7  -5    1.20    3.04   0
   2   7   5   -1.93    3.31   0
  -2  -7  -5    4.30    4.94   0
   2   7   6    9.26    6.10   0
  -2   7  -6   13.82    4.56   0
  -2   7  -6   19.37    5.06   0
  -2  -7  -6   -2.84    3.38   0
  -2   7  -7    0.33    2.88   0
   2   7   7    6.05    5.12   0
  -2  -7  -7    0.62    4.21   0
  -2   7  -8    2.83    2.68   0
   2   7   8   -1.56    3.54   0
  -2  -7  -8    4.82    5.50   0
   2   7   9    8.56    5.82   0
  -2   7  -9   12.62    4.12   0
   2   7   9   17.42    7.41   0
  -2  -7  -9   14.44    7.29   0
  -2   7 -10    1.81    2.88   0
   2   7  10    2.34    4.71   0
   2   7  10   -1.48    4.07   0
  -2  -7 -10   -4.74    4.09   0
  -2   7 -11   29.99    5.38   0
  -2   7 -11   33.88    5.69   0
   2   7  11   29.48    8.77   0
   2   7  11   32.88    8.92   0
  -2  -7 -11   25.14    9.48   0
  -2  -7 -12    1.38    5.23   0
  -2  -7 -13    5.01    7.70   0
   2   8 -12    1.45    3.80   0
  -2   8  12   -4.57    5.47   0
   2  -8 -12   -3.87    5.98   0
   2   8 -11    0.83    3.87   0
  -2   8  11   12.50    7.80   0
   2  -8 -11   11.02    8.16   0
  -2   8  10   -3.41    4.76   0
   2   8 -10    1.91    4.01   0
   2  -8 -10   -0.75    4.71   0
   2   8  -9    4.63    4.37   0
  -2   8   9    8.80    7.54   0
   2  -8  -9    6.76    6.62   0
  -2   8   8   63.80   12.96   0
   2   8  -8   24.21    6.80   0
   2   8  -8   53.39    9.23   0
   2  -8  -8   55.23   12.45   0
   2   8  -7   57.88   10.31   0
   2   8  -7   99.93   12.65   0
  -2   8   7   66.56   12.90   0
   2  -8  -7   56.94   12.31   0
   2   8  -6   -4.32    2.99   0
  -2   8   6    1.83    4.54   0
   2  -8  -6   -1.55    3.69   0
  -2   8   5   -1.22    3.57   0
   2   8  -5   -6.69    2.74   0
   2  -8  -5   -0.82    4.03   0
  -2   8   4    7.08    5.58   0
   2   8  -4    1.83    3.94   0
   2  -8  -4   14.35    6.58   0
  -2  -8   4    6.32    3.38   0
  -2   8   3    8.05    5.49   0
   2   8  -3   -0.48    3.46   0
   2  -8  -3    2.51    4.11   0
  -2  -8   3   -0.98    2.39   0
  -2   8   2   28.24    8.38   0
   2   8  -2   11.74    5.63   0
  -2  -8   2   28.78    6.40   0
   2  -8  -2   24.66    7.15   0
   2   8  -1    2.03    3.90   0
  -2   8   1    0.16    3.85   0
  -2  -8   1    2.87    3.40   0
   2  -8  -1   -0.67    3.30   0
   2   8   0   12.79    5.56   0
  -2   8   0   32.36    8.01   0
  -2  -8   0   17.69    5.94   0
   2  -8   0   20.93    5.80   0
  -2   8  -1    2.95    4.91   0
   2   8   1   -2.89    2.87   0
  -2  -8  -1    3.33    4.18   0
   2  -8   1    0.35    2.69   0
  -2   8  -2    1.11    3.70   0
   2   8   2    1.01    4.10   0
  -2  -8  -2   -6.15    2.37   0
   2  -8   2   -0.85    2.27   0
   2   8   3    4.09    4.64   0
  -2   8  -3    4.37    4.56   0
  -2  -8  -3    6.49    5.09   0
  -2   8  -4   20.62    6.08   0
   2   8   4   16.54    7.07   0
  -2  -8  -4   17.86    7.37   0
  -2   8  -5    5.75    4.42   0
   2   8   5    2.95    5.21   0
  -2  -8  -5    6.43    5.85   0
  -2   8  -6   47.01    8.28   0
   2   8   6   50.99   11.07   0
  -2  -8  -6   49.41   11.19   0
   2   8   7   31.73    9.56   0
  -2   8  -7   26.80    6.28   0
  -2  -8  -7   11.76    6.63   0
  -2   8  -8    5.25    3.94   0
   2   8   8    1.61    5.89   0
  -2  -8  -8    4.67    6.14   0
   2   8   9   18.99    8.96   0
   2   8   9   56.20   12.35   0
  -2   8  -9   23.49    5.88   0
  -2  -8  -9   33.16   10.84   0
  -2   8 -10   -4.80    3.04   0
   2   8  10    3.17    5.87   0
   2   8  10    5.65    7.04   0
  -2  -8 -10    1.48    5.53   0
   2   8  11   20.58    7.95   0
   2   8  11   17.48    8.58   0
  -2   8 -11   34.89    6.59   0
  -2   8 -11   29.26    6.02   0
  -2  -8 -11   17.25    9.32   0
  -2  -8 -12    5.31    6.37   0
   2   9 -11   -2.78    4.31   0
  -2   9  11   -3.01    6.28   0
   2  -9 -11    6.32    7.37   0
  -2   9  10    7.38    6.61   0
   2   9 -10    2.46    4.42   0
   2  -9 -10    5.67    7.77   0
  -2   9   9    6.74    7.11   0
   2   9  -9   12.80    6.46   0
   2  -9  -9   24.60    9.58   0
  -2   9   8   16.57    8.20   0
   2   9  -8    9.54    5.91   0
   2   9  -8   17.17    6.46   0
   2  -9  -8   18.67    9.00   0
  -2   9   7    5.15    6.10   0
   2   9  -7    8.28    5.55   0
   2   9  -7    2.21    4.39   0
   2  -9  -7    8.74    6.69   0
   2   9  -6   37.84    8.99   0
   2   9  -6   33.43    8.66   0
  -2   9   6   15.67    8.33   0
   2  -9  -6   39.28   10.87   0
  -2   9   5   -0.49    5.28   0
   2   9  -5    5.04    5.30   0
   2  -9  -5   -3.03    4.24   0
  -2   9   4   59.08   12.10   0
   2   9  -4   39.86    9.39   0
   2  -9  -4   61.01   12.17   0
  -2   9   3   26.65    8.16   0
   2   9  -3   39.97    9.70   0
   2  -9  -3   40.27    9.95   0
   2   9  -2    5.29    4.95   0
  -2   9   2    6.46    5.79   0
   2  -9  -2    7.59    5.28   0
  -2  -9   2    4.77    4.15   0
  -2   9   1   -2.35    3.70   0
   2   9  -1    7.81    5.11   0
  -2  -9   1    3.12    3.59   0
   2  -9  -1    0.11    3.25   0
  -2   9   0    4.72    5.51   0
   2   9   0    9.49    6.07   0
  -2  -9   0   -1.85    3.44   0
   2  -9   0   -2.72    2.74   0
   2   9   1   17.14    7.12   0
  -2   9  -1    9.24    5.69   0
  -2  -9  -1   27.16    8.35   0
   2  -9   1   10.96    4.64   0
  -2   9  -2   30.85    8.17   0
   2   9   2   -1.21    4.01   0
  -2  -9  -2    0.61    3.98   0
   2   9   3   -5.06    3.32   0
  -2   9  -3    1.84    4.19   0
  -2  -9  -3   -0.01    4.90   0
  -2   9  -4   85.99   12.53   0
   2   9   4   90.57   15.20   0
  -2  -9  -4   91.97   14.47   0
  -2   9  -5   15.80    6.17   0
   2   9   5   18.80    7.94   0
  -2  -9  -5   31.63    9.45   0
   2   9   6   -2.03    5.53   0
  -2   9  -6   -1.99    3.13   0
  -2  -9  -6   -4.38    4.44   0
  -2   9  -7    6.88    4.81   0
   2   9   7    9.31    7.89   0
  -2  -9  -7   16.96    7.84   0
  -2   9  -8    4.05    4.08   0
   2   9   8    9.95    7.13   0
  -2  -9  -8   -4.12    5.12   0
   2   9   9    1.96    6.56   0
  -2   9  -9    1.67    4.04   0
   2   9   9    3.34    6.24   0
  -2  -9  -9    8.93    7.03   0
  -2   9 -10   -0.11    4.08   0
   2   9  10    8.92    7.98   0
   2   9  10    3.47    6.59   0
  -2  -9 -10   -3.59    5.77   0
   2  10  -9    2.67    5.30   0
  -2  10   9    7.24    7.96   0
   2 -10  -9    2.60    6.88   0
   2  10  -8    2.90    4.99   0
  -2  10   8    6.62    7.77   0
   2 -10  -8    5.47    6.89   0
   2  10  -7   16.40    7.20   0
   2  10  -7   23.16    8.34   0
  -2  10   7   18.30    9.58   0
   2 -10  -7   29.89   10.68   0
   2  10  -6    2.99    4.87   0
  -2  10   6   -3.99    5.30   0
   2  10  -6    8.80    5.58   0
   2 -10  -6   11.63    7.10   0
   2  10  -5   -0.38    5.15   0
  -2  10   5    5.09    6.25   0
   2 -10  -5    3.78    6.00   0
  -2  10   4    9.77    6.66   0
   2  10  -4   -2.86    4.07   0
   2 -10  -4   -3.31    4.01   0
   2  10  -3    4.05    5.57   0
  -2  10   3    9.63    6.96   0
   2 -10  -3    6.00    5.88   0
   2  10  -2    5.44    5.69   0
  -2  10   2    6.88    6.18   0
   2 -10  -2    2.06    3.70   0
   2  10  -1   25.87    8.58   0
  -2  10   1    9.60    6.75   0
   2 -10  -1   21.79    7.36   0
  -2  10   0   -0.20    4.27   0
   2  10   0    7.80    6.03   0
  -2 -10   0    3.70    5.15   0
  -2  10  -1    2.72    4.64   0
   2  10   1    2.34    4.71   0
  -2 -10  -1   11.33    6.36   0
   2  10   2    5.78    5.92   0
  -2  10  -2   -3.83    3.34   0
  -2 -10  -2    1.73    5.01   0
  -2  10  -3   82.58   13.19   0
   2  10   3  108.89   17.44   0
  -2 -10  -3   77.95   14.25   0
   2  10   4   -0.60    5.04   0
  -2  10  -4    7.83    6.21   0
  -2 -10  -4   -2.49    3.77   0
   2  10   5    5.56    6.92   0
  -2  10  -5    1.08    4.46   0
  -2 -10  -5   -2.05    5.04   0
   2  10   6   -3.30    6.19   0
  -2  10  -6    2.25    4.45   0
  -2 -10  -6   -3.18    4.51   0
  -2  10  -7    7.70    5.36   0
   2  10   7    4.36    7.43   0
  -2 -10  -7    6.32    6.55   0
   2  10   8    1.55    6.43   0
   2  10   8    2.40    6.76   0
  -2  10  -8    0.46    4.36   0
  -2 -10  -8    7.81    7.69   0
   2  11  -6   -0.10    5.15   0
  -2  11   6    9.79    8.69   0
   2  11  -6    6.19    6.87   0
   2 -11  -6    4.14    6.47   0
   2  11  -5   -2.37    4.80   0
  -2  11   5    9.14    8.04   0
   2  11  -5   10.10    7.97   0
   2 -11  -5    7.62    6.81   0
   2  11  -4    1.01    5.34   0
  -2  11   4   -0.52    5.57   0
   2  11  -4    6.38    7.02   0
   2 -11  -4   -1.80    4.68   0
   2  11  -3    4.42    7.14   0
  -2  11   3    4.92    7.05   0
   2 -11  -3   -3.52    4.39   0
   2  11  -2   19.73    9.40   0
  -2  11   2   17.85    9.09   0
  -2  11   1    4.38    6.49   0
   2  11  -1   -0.88    6.33   0
  -2  11   0   -2.74    4.63   0
   2  11   0   13.75    8.25   0
  -2  11  -1    2.74    5.43   0
   2  11   1   -3.83    5.25   0
   2  11   2   13.55    8.46   0
  -2  11  -2   38.85   10.60   0
  -2 -11  -2    5.07    6.27   0
   2  11   3    3.49    7.57   0
  -2  11  -3   13.86    7.84   0
  -2 -11  -3    5.07    6.37   0
  -2  11  -4   22.42    8.47   0
   2  11   4    6.49    8.10   0
  -2 -11  -4   11.54    7.69   0
   2  11   5   -3.51    6.46   0
  -2  11  -5   -2.41    4.17   0
  -2 -11  -5   -2.32    5.22   0
   3   0 -17    0.66    4.84   0
   3   0 -16   -0.71    4.27   0
   3   0 -15    5.08    4.54   0
   3   0 -14   43.70    8.66   0
   3   0 -13   -1.15    2.85   0
   3   0 -12   51.79    8.38   0
   3   0 -12   44.77    7.94   0
   3   0 -11    2.53    3.03   0
   3   0 -11   -2.41    2.32   0
   3   0 -10  218.04   13.36   0
  -3   0  10  199.48    9.23   0
   3   0 -10  190.60   13.16   0
  -3   0   9   -0.26    1.44   0
   3   0  -9   -1.22    2.06   0
  -3   0   9    0.46    1.55   0
   3   0  -9   -3.19    1.77   0
  -3   0   8  457.40   18.64   0
   3   0  -8  455.44   20.91   0
  -3   0   8  449.61   18.42   0
   3   0  -8  441.61   20.62   0
   3   0  -7   -0.31    2.24   0
   3   0  -7   -3.91    1.76   0
  -3   0   7    2.64    1.87   0
  -3   0   7   -0.76    1.54   0
  -3   0   6   54.42    5.70   0
   3   0  -6   36.66    5.56   0
   3   0  -6   56.54    6.79   0
  -3   0   6   51.65    5.67   0
  -3   0   5    2.01    1.97   0
   3   0  -5   -1.38    1.97   0
   3   0  -5    0.88    2.09   0
  -3   0   5    0.13    1.81   0
   3   0  -4   18.21    3.79   0
   3   0  -4   14.87    3.43   0
  -3   0   4   15.55    3.26   0
  -3   0   4   15.82    3.26   0
  -3   0   3    0.93    1.93   0
   3   0  -3    1.13    2.12   0
  -3   0   3   -0.81    1.72   0
   3   0  -3   -0.12    2.04   0
  -3   0   2  232.86   10.90   0
   3   0  -2  252.27   11.34   0
  -3   0   2  251.44   11.26   0
   3   0  -2  248.24   11.20   0
  -3   0   1    2.78    1.91   0
   3   0  -1    2.50    1.74   0
  -3   0   1    2.32    1.89   0
   3   0  -1    2.69    1.73   0
  -3   0   0 2775.52   89.78   0
   3   0   0 2768.04   89.81   0
   3   0   0 2723.18   89.76   0
  -3   0   0 2623.60   89.80   0
   3   0   1    2.92    1.67   0
   3   0   1    8.86    2.15   0
  -3   0  -1    6.46    2.14   0
  -3   0  -1    4.82    1.95   0
   3   0   2   22.11    2.72   0
  -3   0  -2   20.89    2.99   0
  -3   0  -2   17.58    2.82   0
   3   0   2   15.90    2.41   0
  -3   0  -3    0.17    1.35   0
   3   0   3    1.94    1.15   0
   3   0   3    2.84    1.32   0
  -3   0  -3    0.70    1.57   0
  -3   0  -4   24.79    3.49   0
   3   0   4   15.24    1.43   0
  -3   0  -4   20.57    3.30   0
   3   0   4   20.80    1.63   0
  -3   0  -5    0.53    1.35   0
  -3   0  -5   -1.15    1.52   0
  -3   0  -6    0.42    1.57   0
  -3   0  -6    2.02    2.05   0
  -3   0  -6    0.81    1.70   0
  -3   0  -7    4.66    2.38   0
  -3   0  -7    0.36    1.87   0
  -3   0  -8  209.29   11.33   0
  -3   0  -8  190.86   10.88   0
  -3   0  -9    0.89    2.03   0
  -3   0  -9    1.12    1.99   0
  -3   0 -10   92.76    8.11   0
  -3   0 -10  100.69    8.47   0
  -3   0 -11   -1.82    2.55   0
  -3   0 -11    0.30    2.58   0
  -3   0 -12   10.60    4.43   0
  -3   0 -13    8.55    4.38   0
  -3   0 -14    3.43    3.76   0
  -3   0 -15    3.88    4.29   0
  -3   0 -16    2.82    4.54   0
   3   1 -17    4.72    5.14   0
   3  -1 -17   -0.66    4.67   0
   3   1 -16   -1.62    3.45   0
   3  -1 -16   -0.55    4.76   0
   3   1 -15   -0.52    3.70   0
   3  -1 -15   -1.04    3.66   0
   3   1 -14   10.25    4.78   0
   3  -1 -14    1.55    4.39   0
   3   1 -13    0.51    3.39   0
   3  -1 -13   10.47    5.01   0
   3   1 -12    0.94    3.30   0
   3   1 -12    7.47    3.88   0
  -3   1  12    0.74    1.60   0
   3  -1 -12    6.81    4.10   0
   3   1 -11  134.38   10.19   0
   3   1 -11  121.65    9.64   0
  -3   1  11  111.69    7.93   0
   3  -1 -11  121.49   10.88   0
   3   1 -10    0.43    2.40   0
   3   1 -10    5.49    3.04   0
  -3   1  10    4.60    2.59   0
   3  -1 -10    5.68    3.65   0
   3  -1 -10    2.44    3.01   0
   3   1  -9    4.04    2.75   0
   3   1  -9    1.44    2.36   0
  -3   1   9    8.31    3.15   0
   3  -1  -9    7.50    3.68   0
   3  -1  -9    5.23    3.71   0
   3   1  -8   21.12    4.31   0
  -3   1   8   23.72    4.64   0
   3   1  -8   12.40    3.77   0
  -3  -1   8   21.38    2.16   0
  -3  -1   8   20.93    1.89   0
   3  -1  -8   20.20    4.80   0
   3  -1  -8   18.77    5.11   0
   3   1  -7   26.12    4.68   0
  -3   1   7   23.82    4.56   0
   3   1  -7   22.93    4.29   0
   3  -1  -7   24.02    5.48   0
   3  -1  -7   25.18    4.93   0
  -3  -1   7   29.67    3.31   0
   3   1  -6  189.98   10.07   0
  -3   1   6  172.71   10.08   0
  -3   1   6  142.42    9.86   0
   3   1  -6  161.27    9.56   0
  -3  -1   6  163.40    8.19   0
   3  -1  -6  168.77   10.57   0
  -3  -1   6  186.94    8.49   0
   3  -1  -6  168.78   11.01   0
  -3   1   5    0.07    2.02   0
  -3   1   5    2.49    2.25   0
   3   1  -5    3.80    2.30   0
   3   1  -5    5.73    2.68   0
   3  -1  -5    4.13    2.87   0
  -3  -1   5    3.04    1.79   0
  -3  -1   5    1.67    1.64   0
   3  -1  -5   -0.45    1.94   0
   3   1  -4   95.97    6.51   0
  -3   1   4   88.75    6.87   0
   3   1  -4   78.74    6.02   0
  -3   1   4   85.21    6.58   0
   3  -1  -4   94.65    7.02   0
  -3  -1   4   97.01    5.97   0
   3  -1  -4   92.17    7.09   0
  -3  -1   4   85.01    5.65   0
  -3   1   3 1409.03   51.60   0
   3   1  -3 1425.34   50.69   0
   3   1  -3 1482.62   50.87   0
  -3   1   3 1458.23   51.46   0
  -3  -1   3 1467.95   50.51   0
   3  -1  -3 1491.77   51.91   0
   3  -1  -3 1466.83   51.72   0
  -3  -1   3 1555.57   50.55   0
  -3   1   2 1318.48   44.25   0
   3   1  -2 1255.64   43.86   0
  -3   1   2 1325.75   44.65   0
   3   1  -2 1230.12   43.72   0
   3  -1  -2 1248.74   44.31   0
   3  -1  -2 1257.19   44.33   0
  -3  -1   2 1237.95   43.54   0
  -3  -1   2 1177.32   43.52   0
  -3   1   1  280.02   12.05   0
  -3   1   1  267.36   12.01   0
   3   1  -1  250.23   11.74   0
   3   1  -1  271.89   11.99   0
  -3  -1   1  268.08   12.05   0
   3  -1  -1  268.04   11.98   0
   3  -1  -1  261.61   11.77   0
  -3  -1   1  261.51   11.86   0
   3   1   0   92.95    5.82   0
  -3   1   0   72.33    5.10   0
   3   1   0   84.20    5.69   0
  -3   1   0   81.53    5.28   0
  -3  -1   0   80.02    5.50   0
   3  -1   0   75.67    5.08   0
   3  -1   0   80.25    5.19   0
  -3  -1   0   80.42    5.70   0
   3   1   1    9.50    2.78   0
  -3   1  -1    8.29    2.02   0
  -3   1  -1    6.24    1.95   0
   3   1   1    6.88    2.59   0
  -3  -1  -1   10.08    2.91   0
  -3  -1  -1    7.57    2.74   0
   3  -1   1    5.35    1.67   0
   3  -1   1    6.57    1.73   0
  -3   1  -2    3.70    1.50   0
   3   1   2    3.03    2.15   0
  -3   1  -2    5.00    1.60   0
   3   1   2    6.17    2.30   0
  -3  -1  -2    6.13    2.56   0
  -3  -1  -2    9.91    3.12   0
  -3   1  -3    1.53    1.09   0
   3   1   3   -1.50    1.55   0
  -3   1  -3   -0.54    0.88   0
   3   1   3    4.17    2.23   0
  -3  -1  -3    2.84    2.43   0
  -3  -1  -3   -1.04    1.74   0
  -3  -1  -3   -0.34    1.88   0
   3   1   4  109.68    6.65   0
  -3   1  -4  107.16    4.77   0
  -3   1  -4  102.80    4.63   0
   3   1   4  102.37    6.56   0
  -3  -1  -4   98.57    7.24   0
  -3  -1  -4  105.03    7.18   0
  -3  -1  -4   96.32    6.96   0
   3   1   5  306.05   13.30   0
  -3   1  -5  316.74   11.54   0
  -3   1  -5  301.82   11.38   0
   3   1   5  302.94   13.32   0
  -3  -1  -5  290.29   14.35   0
  -3  -1  -5  307.76   14.80   0
   3   1   6  199.29    9.65   0
  -3   1  -6  203.73    8.46   0
  -3   1  -6  203.03    8.58   0
   3   1   6  197.96    9.60   0
  -3  -1  -6  183.00   11.08   0
  -3  -1  -6  197.76   11.37   0
   3   1   7  531.23   19.89   0
  -3   1  -7  519.61   19.59   0
  -3   1  -7  507.63   19.43   0
   3   1   7  513.43   19.74   0
  -3  -1  -7  536.36   22.85   0
  -3  -1  -7  533.48   23.04   0
   3   1   8    3.09    1.36   0
  -3   1  -8    1.76    1.75   0
   3   1   8    4.58    1.42   0
  -3   1  -8    1.83    1.79   0
  -3  -1  -8    0.28    2.36   0
  -3  -1  -8   -0.35    2.33   0
  -3   1  -9   74.60    5.80   0
  -3   1  -9   74.30    5.89   0
  -3  -1  -9   88.11    9.61   0
  -3  -1  -9   85.97    9.67   0
  -3   1 -10    9.77    3.13   0
  -3   1 -10   14.55    3.57   0
  -3  -1 -10   23.18    5.64   0
  -3  -1 -10    6.59    3.74   0
  -3   1 -11    5.72    3.02   0
  -3   1 -11    3.55    2.53   0
  -3  -1 -11    1.41    2.72   0
  -3  -1 -11    3.72    3.45   0
  -3   1 -12   30.55    5.61   0
  -3  -1 -12   27.21    6.80   0
  -3   1 -13   30.82    6.06   0
  -3  -1 -13   35.65    7.88   0
  -3   1 -14   -0.60    2.87   0
  -3  -1 -14    0.50    3.89   0
  -3   1 -15    1.27    3.68   0
  -3  -1 -15   -0.69    3.91   0
  -3   1 -16    6.03    4.71   0
  -3  -1 -16   -0.18    4.75   0
   3   2 -17    2.07    4.18   0
   3  -2 -17   -4.28    4.70   0
   3   2 -16    0.45    3.90   0
   3  -2 -16   -0.41    4.89   0
   3   2 -15    5.86    4.21   0
   3  -2 -15   -4.14    3.67   0
   3   2 -14    4.88    3.75   0
   3  -2 -14    7.52    5.40   0
   3   2 -13    0.78    3.01   0
   3  -2 -13   -1.14    3.63   0
   3   2 -12   15.25    4.52   0
   3   2 -12   11.21    4.41   0
  -3   2  12   14.65    4.61   0
   3  -2 -12    7.63    5.13   0
   3   2 -11    0.57    2.32   0
  -3   2  11   -0.37    2.50   0
   3   2 -11    0.35    2.54   0
   3  -2 -11   -0.29    3.08   0
   3   2 -10   61.25    7.71   0
   3   2 -10   49.73    6.60   0
  -3   2  10   53.50    7.52   0
   3  -2 -10   64.52   10.32   0
   3   2  -9    5.53    2.71   0
  -3   2   9    0.12    2.32   0
   3   2  -9    0.85    2.34   0
   3  -2  -9    6.46    3.72   0
   3   2  -8    2.25    2.32   0
   3   2  -8    1.68    2.26   0
  -3   2   8    5.65    3.24   0
   3  -2  -8    2.21    3.08   0
   3   2  -7   21.61    4.26   0
  -3   2   7   14.66    4.39   0
   3   2  -7   16.05    3.64   0
   3  -2  -7   19.00    5.33   0
   3  -2  -7   15.21    4.74   0
   3   2  -6  624.85   24.75   0
  -3   2   6  625.13   27.08   0
   3   2  -6  670.09   25.14   0
   3  -2  -6  591.78   27.25   0
  -3  -2   6  623.75   21.87   0
   3  -2  -6  624.22   27.36   0
   3   2  -5    1.43    2.11   0
  -3   2   5    0.17    2.08   0
  -3   2   5   -0.88    2.36   0
   3   2  -5    3.67    2.23   0
   3  -2  -5    2.48    2.57   0
  -3  -2   5    0.45    1.33   0
  -3  -2   5    0.77    1.45   0
   3  -2  -5    1.10    2.45   0
  -3   2   4   -1.45    2.27   0
   3   2  -4   -1.37    1.49   0
   3   2  -4   -1.46    2.03   0
  -3   2   4    3.09    2.79   0
   3  -2  -4    1.88    2.47   0
   3  -2  -4    1.68    2.76   0
  -3  -2   4   -0.27    1.58   0
  -3  -2   4    2.35    1.56   0
   3   2  -3  206.75   10.34   0
  -3   2   3  180.33   10.74   0
  -3   2   3  178.79   10.95   0
   3   2  -3  189.28   10.10   0
  -3  -2   3  198.49    9.68   0
   3  -2  -3  218.64   11.67   0
  -3  -2   3  193.38    9.60   0
  -3  -2   3  187.17    9.68   0
  -3   2   2  187.97   10.89   0
  -3   2   2  172.11   10.08   0
   3   2  -2  197.50   10.11   0
   3   2  -2  187.51   10.01   0
   3  -2  -2  183.77   10.34   0
  -3  -2   2  193.41    9.71   0
  -3  -2   2  199.69   10.04   0
   3  -2  -2  180.67   10.22   0
  -3  -2   2  184.55    9.70   0
  -3   2   1  129.88    8.12   0
   3   2  -1  125.14    7.89   0
  -3   2   1  128.84    7.80   0
   3   2  -1  115.33    7.72   0
   3  -2  -1  134.75    7.97   0
  -3  -2   1  132.44    7.98   0
  -3  -2   1  122.92    7.70   0
   3  -2  -1  118.57    7.54   0
  -3  -2   1  123.36    7.74   0
  -3   2   0  439.16   17.46   0
  -3   2   0  424.53   17.67   0
   3   2   0  436.98   18.30   0
   3   2   0  451.66   18.54   0
  -3  -2   0  425.05   18.12   0
   3  -2   0  420.77   17.23   0
   3  -2   0  424.98   17.21   0
  -3  -2   0  422.62   18.50   0
   3   2   1   66.89    5.79   0
  -3   2  -1   70.90    5.09   0
   3   2   1   71.74    6.10   0
  -3   2  -1   65.47    4.82   0
   3  -2   1   64.21    4.35   0
  -3  -2  -1   70.26    7.25   0
   3  -2   1   65.58    4.35   0
  -3  -2  -1   72.69    6.01   0
   3   2   2  389.68   17.34   0
  -3   2  -2  375.21   14.77   0
  -3   2  -2  384.95   14.75   0
   3   2   2  396.98   17.48   0
  -3  -2  -2  392.15   17.80   0
  -3  -2  -2  384.87   17.42   0
   3   2   3   76.83    7.72   0
  -3   2  -3   67.12    3.66   0
   3   2   3   69.08    6.07   0
  -3   2  -3   60.62    3.54   0
  -3  -2  -3   70.82    6.26   0
  -3  -2  -3   53.21    6.86   0
   3   2   4   41.85    5.92   0
   3   2   4   49.64    6.29   0
  -3  -2  -4   56.81    7.11   0
  -3  -2  -4   45.72    6.62   0
   3   2   5    0.85    1.94   0
   3   2   5    1.80    2.32   0
  -3  -2  -5    0.36    2.66   0
  -3  -2  -5    1.58    2.63   0
   3   2   6   27.25    5.11   0
  -3  -2  -6   32.20    5.87   0
  -3  -2  -6   31.44    5.93   0
   3   2   7  121.13    8.48   0
  -3  -2  -7  121.72    9.72   0
  -3  -2  -7  121.49   10.19   0
  -3   2  -8  166.01    6.71   0
   3   2   8  160.55   10.02   0
  -3  -2  -8  161.15   12.02   0
  -3  -2  -8  185.95   12.69   0
  -3   2  -9  209.47    8.97   0
  -3   2  -9  203.19    8.93   0
   3   2   9  219.12   11.46   0
  -3  -2  -9  210.85   14.46   0
  -3  -2  -9  196.69   13.90   0
   3   2  10   59.92    5.33   0
  -3   2 -10   66.31    4.88   0
  -3   2 -10   64.05    4.73   0
  -3  -2 -10   50.50    8.85   0
  -3   2 -11   10.36    2.89   0
  -3   2 -11   12.24    3.04   0
  -3  -2 -11   19.36    6.37   0
  -3   2 -12    3.64    2.72   0
  -3  -2 -12    2.34    3.37   0
  -3   2 -13    2.00    2.74   0
  -3  -2 -13    0.20    4.35   0
  -3   2 -14   11.04    3.82   0
  -3  -2 -14    3.93    5.33   0
  -3   2 -15    4.27    3.41   0
  -3  -2 -15    2.45    5.44   0
  -3  -2 -16    3.35    5.31   0
   3   3 -16    3.60    3.95   0
   3  -3 -16    2.72    5.67   0
   3   3 -15   13.67    5.05   0
   3  -3 -15    7.27    6.68   0
   3   3 -14    3.41    3.25   0
   3  -3 -14    1.45    5.06   0
   3   3 -13   10.59    4.24   0
   3  -3 -13   14.25    6.91   0
  -3   3  12    2.07    3.16   0
   3   3 -12    1.35    2.57   0
   3  -3 -12   -0.30    3.89   0
   3   3 -11   45.84    6.85   0
  -3   3  11   53.23    8.53   0
   3   3 -11   48.21    6.86   0
   3  -3 -11   56.87   10.43   0
   3   3 -10    1.77    2.52   0
   3   3 -10    2.35    2.41   0
  -3   3  10    4.73    3.80   0
   3  -3 -10    1.81    3.89   0
  -3   3   9    9.37    4.26   0
   3   3  -9   18.81    4.19   0
   3   3  -9   12.00    3.77   0
   3  -3  -9   12.88    5.42   0
  -3   3   8   27.76    6.45   0
   3   3  -8   17.58    3.91   0
   3   3  -8   13.80    3.68   0
   3  -3  -8    9.26    4.41   0
   3   3  -7    0.28    2.00   0
   3   3  -7    1.14    1.94   0
  -3   3   7   -1.79    2.37   0
   3  -3  -7   -2.50    2.35   0
   3   3  -6  163.59   10.15   0
  -3   3   6  174.82   12.45   0
   3   3  -6  164.45    9.79   0
   3  -3  -6  178.29   12.60   0
   3   3  -5  466.83   20.63   0
  -3   3   5  516.57   23.90   0
   3   3  -5  502.81   20.95   0
   3  -3  -5  500.77   23.75   0
  -3  -3   5  488.02   18.63   0
  -3  -3   5  498.65   18.79   0
   3   3  -4  257.85   13.25   0
  -3   3   4  258.11   15.20   0
   3   3  -4  259.67   13.29   0
   3  -3  -4  275.99   15.38   0
  -3  -3   4  273.70   12.11   0
  -3  -3   4  266.35   12.22   0
   3  -3  -4  277.26   15.93   0
  -3   3   3  129.04    9.97   0
   3   3  -3  136.64    8.82   0
   3   3  -3  152.09    9.25   0
  -3   3   3  152.01    9.96   0
   3  -3  -3  133.88   10.06   0
  -3  -3   3  135.06    8.17   0
  -3  -3   3  136.90    8.45   0
   3   3  -2    6.90    3.11   0
   3   3  -2    3.71    2.65   0
  -3   3   2    2.77    2.99   0
  -3   3   2    6.89    2.98   0
   3   3  -2    4.67    2.72   0
   3  -3  -2    6.76    2.84   0
  -3  -3   2    4.60    2.40   0
   3  -3  -2    5.19    3.16   0
  -3  -3   2    2.62    2.54   0
   3   3  -1  312.43   15.18   0
  -3   3   1  306.86   14.96   0
   3   3  -1  312.58   15.35   0
   3   3  -1  304.76   15.17   0
  -3   3   1  306.41   15.41   0
   3  -3  -1  300.25   14.78   0
  -3  -3   1  298.07   14.83   0
  -3  -3   1  305.78   14.71   0
   3  -3  -1  315.42   14.85   0
  -3   3   0   31.01    4.88   0
   3   3   0   20.85    4.57   0
   3   3   0   20.70    4.64   0
  -3   3   0   30.67    5.04   0
   3   3   0   21.62    4.69   0
  -3  -3   0   31.97    5.28   0
   3  -3   0   35.51    4.83   0
  -3  -3   0   26.40    5.23   0
   3  -3   0   32.69    4.79   0
  -3   3  -1    6.77    2.63   0
  -3   3  -1    4.12    2.47   0
   3   3   1    5.27    3.15   0
   3   3   1    0.69    2.43   0
   3   3   1    5.46    3.28   0
  -3  -3  -1    6.01    2.84   0
  -3  -3  -1    0.17    2.39   0
   3  -3   1    4.68    1.95   0
   3  -3   1    4.42    2.13   0
   3   3   2    9.82    3.66   0
   3   3   2    7.48    3.65   0
  -3   3  -2   12.12    2.91   0
   3   3   2    7.29    3.40   0
  -3   3  -2   14.67    3.08   0
  -3  -3  -2   10.41    3.90   0
   3  -3   2   14.53    2.00   0
  -3  -3  -2    6.48    3.48   0
   3   3   3   41.21    6.58   0
  -3   3  -3   42.48    3.82   0
   3   3   3   49.25    7.08   0
  -3   3  -3   42.48    3.86   0
  -3  -3  -3   48.15    7.01   0
  -3  -3  -3   43.35    7.09   0
   3   3   4   49.84    7.00   0
   3   3   4   47.80    7.04   0
  -3   3  -4   51.47    3.58   0
  -3   3  -4   54.92    3.60   0
  -3  -3  -4   46.86    7.62   0
  -3  -3  -4   55.29    7.83   0
  -3   3  -5   46.52    2.62   0
  -3   3  -5   52.62    2.73   0
   3   3   5   62.65    7.95   0
   3   3   5   46.78    6.98   0
  -3  -3  -5   58.62    8.73   0
  -3  -3  -5   61.52    8.67   0
   3   3   6   37.65    6.63   0
  -3  -3  -6   33.38    6.89   0
   3   3   7    4.28    2.87   0
  -3  -3  -7    9.51    4.47   0
   3   3   8   82.09    9.55   0
  -3  -3  -8   72.66   10.18   0
   3   3   9  107.76    9.25   0
  -3  -3  -9  130.48   14.54   0
   3   3  10  179.37   11.79   0
  -3  -3 -10  170.57   14.67   0
  -3   3 -11   10.52    2.17   0
  -3   3 -11   10.05    2.05   0
  -3  -3 -11   18.49    6.52   0
  -3   3 -12    5.67    2.16   0
  -3  -3 -12    5.98    5.25   0
  -3   3 -13    1.15    1.99   0
  -3  -3 -13    1.28    4.58   0
  -3   3 -14   10.00    3.46   0
  -3  -3 -14    0.24    4.45   0
  -3  -3 -15   -3.41    5.19   0
   3   4 -16   10.96    4.48   0
   3  -4 -16    3.97    7.07   0
   3   4 -15    0.12    3.53   0
   3  -4 -15    1.53    5.91   0
   3   4 -14    3.86    3.37   0
   3  -4 -14    5.22    5.71   0
   3   4 -13    9.00    4.01   0
   3  -4 -13   11.38    7.03   0
   3   4 -12    3.06    2.70   0
  -3   4  12    3.66    4.40   0
   3  -4 -12    0.44    4.39   0
   3   4 -11   -3.33    2.26   0
  -3   4  11   -3.11    3.07   0
   3   4 -11    2.80    2.74   0
   3  -4 -11   -1.78    3.96   0
   3   4 -10   59.16    7.72   0
  -3   4  10   76.20   10.62   0
   3   4 -10   66.10    8.08   0
   3  -4 -10   97.85   14.70   0
   3   4  -9    3.14    2.63   0
  -3   4   9    6.00    4.65   0
   3   4  -9    7.12    3.17   0
   3  -4  -9   -1.44    3.17   0
   3   4  -8   57.60    7.37   0
   3   4  -8   59.20    7.13   0
  -3   4   8   47.52    8.42   0
   3  -4  -8   48.75    9.96   0
   3   4  -7   -0.14    2.14   0
  -3   4   7    1.30    3.72   0
   3   4  -7    1.91    2.16   0
   3  -4  -7   -0.30    2.77   0
   3   4  -6  278.08   14.54   0
   3   4  -6  284.37   14.74   0
  -3   4   6  285.14   17.75   0
   3   4  -5  298.49   15.16   0
   3   4  -5  283.82   14.82   0
  -3  -4   5  292.66   12.74   0
  -3  -4   5  286.42   12.57   0
   3  -4  -5  303.72   18.11   0
   3   4  -4   -0.44    2.32   0
   3   4  -4    1.68    2.43   0
  -3   4   4   -0.35    2.67   0
   3   4  -4    4.51    3.01   0
  -3  -4   4   -0.42    1.71   0
  -3  -4   4   -1.37    1.71   0
   3  -4  -4   -2.18    2.64   0
   3   4  -3  156.57   10.51   0
   3   4  -3  156.84   10.32   0
   3   4  -3  143.96   10.13   0
  -3   4   3  154.05   11.76   0
  -3  -4   3  157.62    9.71   0
  -3  -4   3  165.81    9.64   0
   3  -4  -3  146.55   11.30   0
  -3   4   2  482.70   22.95   0
   3   4  -2  447.29   21.26   0
   3   4  -2  444.06   21.22   0
   3   4  -2  505.29   21.68   0
  -3   4   2  453.11   21.91   0
   3  -4  -2  519.53   22.65   0
  -3  -4   2  408.96   20.25   0
  -3  -4   2  487.98   22.22   0
   3   4  -1   22.88    5.14   0
   3   4  -1   20.19    4.98   0
  -3   4   1   17.64    4.71   0
  -3   4   1   13.57    4.04   0
  -3  -4   1   24.73    5.08   0
   3  -4  -1   12.55    4.02   0
  -3   4   0  396.39   19.07   0
   3   4   0  406.36   19.62   0
   3   4   0  385.56   19.57   0
  -3   4   0  409.84   18.94   0
  -3  -4   0  382.00   19.45   0
   3  -4   0  392.34   17.82   0
   3  -4   0  391.63   18.06   0
   3   4   1   24.06    5.30   0
  -3   4  -1   21.00    4.78   0
  -3   4  -1   17.01    4.05   0
   3  -4   1   25.50    4.14   0
  -3  -4  -1   28.25    5.80   0
   3  -4   1   21.07    3.85   0
  -3   4  -2    5.97    2.69   0
   3   4   2    5.01    3.73   0
  -3   4  -2   13.09    3.61   0
  -3  -4  -2    5.19    3.79   0
   3  -4   2    5.12    1.91   0
   3  -4   2    8.05    2.14   0
  -3   4  -3    3.77    2.22   0
   3   4   3    0.39    2.84   0
  -3   4  -3   -0.22    1.96   0
  -3  -4  -3    0.87    2.92   0
  -3   4  -4    4.71    2.10   0
   3   4   4    0.22    2.69   0
   3   4   4   -0.04    2.99   0
  -3   4  -4    1.73    1.80   0
  -3  -4  -4    3.41    3.32   0
   3   4   5    6.03    3.70   0
  -3   4  -5    8.96    2.30   0
   3   4   5    4.20    3.55   0
  -3   4  -5    8.08    2.08   0
  -3  -4  -5    5.38    3.33   0
   3   4   6    3.03    3.46   0
   3   4   6    5.15    3.46   0
  -3   4  -6    3.74    1.56   0
  -3   4  -6   10.04    2.02   0
  -3  -4  -6    4.18    3.83   0
  -3   4  -7  124.38    5.54   0
  -3   4  -7  107.08    5.30   0
   3   4   7  122.48   12.74   0
   3   4   7  121.41   10.57   0
  -3  -4  -7  107.66   13.49   0
   3   4   8  494.61   24.95   0
  -3  -4  -8  508.34   27.51   0
   3   4   9   -2.38    2.21   0
  -3  -4  -9   -1.64    3.49   0
   3   4  10    0.30    2.97   0
  -3  -4 -10   -1.02    4.00   0
   3   4  11   -0.07    2.23   0
  -3  -4 -11   -0.32    4.55   0
  -3  -4 -12    1.78    4.73   0
  -3  -4 -13    2.88    5.23   0
  -3  -4 -14    1.58    5.46   0
  -3  -4 -15    6.92    6.46   0
   3   5 -15    7.81    4.23   0
   3  -5 -15   -0.18    4.88   0
   3   5 -14    4.31    3.25   0
   3  -5 -14    8.89    7.72   0
   3   5 -13    3.59    3.33   0
   3  -5 -13   -1.74    4.27   0
  -3   5  12   12.59    6.01   0
   3   5 -12    5.51    3.77   0
   3  -5 -12    2.13    4.27   0
  -3   5  11   -0.15    3.90   0
   3   5 -11    2.06    3.21   0
   3  -5 -11    2.93    4.74   0
   3   5 -10   10.60    4.10   0
   3   5 -10    5.63    3.67   0
  -3   5  10   18.12    6.28   0
   3  -5 -10   18.02    7.26   0
  -3   5   9   38.72    8.48   0
   3   5  -9   29.53    5.79   0
   3   5  -9   36.72    6.43   0
   3  -5  -9   47.81   10.49   0
   3   5  -8   47.20    7.22   0
  -3   5   8   52.00    9.85   0
   3   5  -8   59.45    7.94   0
   3  -5  -8   49.25    9.88   0
  -3   5   7   71.76   11.77   0
   3   5  -7   88.01    9.41   0
   3   5  -7   79.22    9.07   0
   3  -5  -7   61.10   10.57   0
   3   5  -6   35.91    6.47   0
  -3   5   6   25.67    6.97   0
   3   5  -6   30.72    5.92   0
   3  -5  -6   30.48    7.48   0
  -3  -5   6   31.37    2.40   0
  -3  -5   6   28.57    2.35   0
   3   5  -5  517.03   23.97   0
   3   5  -5  538.04   24.08   0
  -3   5   5  520.08   27.04   0
   3   5  -5  517.06   23.96   0
   3  -5  -5  524.55   27.04   0
  -3  -5   5  521.76   20.78   0
  -3  -5   5  506.34   20.78   0
   3   5  -4  117.51    9.58   0
  -3   5   4   98.08   12.65   0
   3   5  -4  118.87    9.34   0
   3   5  -4  110.56    9.47   0
   3  -5  -4  113.22   13.03   0
  -3  -5   4  114.10    8.17   0
   3   5  -3  257.68   15.28   0
  -3   5   3  307.86   18.05   0
   3   5  -3  248.65   14.85   0
   3  -5  -3  254.77   16.37   0
  -3  -5   3  254.17   14.02   0
  -3   5   2  205.96   14.67   0
   3   5  -2  225.89   13.94   0
   3   5  -2  211.81   13.90   0
   3  -5  -2  219.86   14.04   0
  -3  -5   2  219.79   13.25   0
   3   5  -1   37.47    7.07   0
  -3   5   1   40.92    7.39   0
  -3  -5   1   44.06    7.21   0
   3  -5  -1   53.13    7.97   0
  -3   5   0    6.85    3.88   0
   3   5   0    1.08    2.66   0
  -3   5   0    4.00    3.28   0
  -3  -5   0    7.13    3.82   0
   3  -5   0    5.37    2.67   0
  -3   5  -1   -0.91    2.42   0
   3   5   1    3.77    3.52   0
  -3   5  -1    1.60    2.75   0
  -3  -5  -1    8.13    3.78   0
   3  -5   1    3.06    2.34   0
  -3   5  -2    2.71    2.70   0
  -3   5  -2    7.65    3.38   0
   3   5   2    4.49    3.93   0
   3  -5   2    5.46    2.34   0
  -3  -5  -2    7.57    4.11   0
   3  -5   2    7.40    2.29   0
  -3   5  -3  116.82    8.47   0
  -3   5  -3   99.93    8.24   0
   3   5   3   94.73   11.50   0
   3  -5   3  110.37    4.73   0
  -3  -5  -3  101.24   12.75   0
   3  -5   3   98.96    4.60   0
  -3   5  -4   15.78    3.92   0
  -3   5  -4   11.02    3.35   0
   3   5   4   12.31    4.67   0
  -3  -5  -4   17.29    6.17   0
  -3   5  -5   31.74    4.92   0
   3   5   5   37.67    7.55   0
  -3   5  -5   39.84    5.42   0
  -3  -5  -5   28.26    7.11   0
   3   5   6   45.81    8.69   0
  -3   5  -6   57.96    5.99   0
  -3   5  -6   59.97    6.29   0
   3   5   6   52.31    9.11   0
  -3  -5  -6   57.62   10.25   0
   3   5   7    1.37    3.45   0
  -3   5  -7    0.99    1.79   0
   3   5   7    1.66    2.91   0
  -3   5  -7    3.33    2.05   0
  -3  -5  -7   -3.30    3.04   0
  -3   5  -8   61.42    4.78   0
   3   5   8   73.57   10.99   0
   3   5   8   61.13   10.37   0
  -3   5  -8   60.74    4.78   0
  -3  -5  -8   49.61    9.97   0
  -3   5  -9   15.05    2.60   0
   3   5   9   23.94    6.64   0
  -3   5  -9   15.69    2.62   0
  -3  -5  -9   10.15    5.81   0
   3   5  10   17.47    6.04   0
  -3   5 -10   16.83    2.51   0
  -3   5 -10   12.08    2.38   0
  -3  -5 -10    0.56    4.29   0
   3   5  11    0.66    3.36   0
  -3  -5 -11    0.74    4.25   0
  -3  -5 -12   15.56    7.16   0
  -3  -5 -13    5.16    5.89   0
  -3  -5 -14   17.77    8.41   0
   3   6 -15    4.65    5.15   0
   3  -6 -15    2.80    6.67   0
   3   6 -14    1.18    3.54   0
   3  -6 -14   -0.42    5.11   0
   3   6 -13   10.55    4.73   0
   3  -6 -13    8.42    7.24   0
  -3   6  12    0.13    4.41   0
   3   6 -12    2.88    3.48   0
   3  -6 -12   -4.72    3.77   0
  -3   6  11   -0.14    4.62   0
   3   6 -11   -0.25    3.02   0
   3  -6 -11    1.96    4.99   0
  -3   6  10   22.69    8.05   0
   3   6 -10   22.89    5.67   0
   3  -6 -10   20.68    8.14   0
   3   6  -9   28.92    6.65   0
  -3   6   9   36.07    9.03   0
   3  -6  -9   41.28   10.33   0
  -3   6   8   56.97   10.74   0
   3   6  -8   58.69    8.26   0
   3   6  -8   45.39    7.79   0
   3  -6  -8   53.45   10.78   0
   3   6  -7  535.71   25.26   0
   3   6  -7  521.15   25.39   0
  -3   6   7  523.03   29.65   0
   3  -6  -7  540.78   30.45   0
  -3   6   6   84.56   12.71   0
   3   6  -6   78.71    9.95   0
   3   6  -6   76.41    9.73   0
   3   6  -6   81.00    9.87   0
  -3  -6   6   74.00    4.49   0
   3  -6  -6   75.08   11.99   0
  -3  -6   6   77.55    4.60   0
   3   6  -5  135.03   11.16   0
   3   6  -5  127.01   10.82   0
  -3   6   5  135.12   15.42   0
   3   6  -5  123.94   10.18   0
   3  -6  -5  156.40   13.43   0
  -3  -6   5  123.32    8.28   0
   3   6  -4  123.39   10.76   0
  -3   6   4  112.04   14.40   0
  -3  -6   4   98.48    8.10   0
   3  -6  -4   92.69   12.77   0
  -3   6   3    2.59    4.30   0
   3   6  -3    3.11    3.74   0
   3  -6  -3    2.33    3.54   0
  -3  -6   3    5.61    3.47   0
  -3   6   2   99.98   12.66   0
   3   6  -2   98.74   11.47   0
  -3  -6   2  110.31    9.46   0
   3  -6  -2  123.23   13.38   0
   3   6  -1    0.40    3.62   0
  -3   6   1    2.00    3.18   0
  -3  -6   1    1.29    2.92   0
   3  -6  -1    5.70    3.48   0
  -3   6   0    5.73    3.93   0
   3   6   0   16.77    5.52   0
  -3  -6   0   11.19    4.75   0
   3  -6   0    5.86    3.42   0
  -3   6  -1    0.57    2.91   0
   3   6   1    3.10    3.57   0
  -3  -6  -1   -1.68    2.75   0
   3  -6   1   -1.70    1.98   0
   3   6   2    0.48    3.20   0
  -3   6  -2   -2.73    2.19   0
  -3   6  -2    0.36    2.78   0
  -3  -6  -2   -2.23    2.73   0
   3  -6   2    3.01    2.15   0
  -3   6  -3   92.94   10.31   0
  -3   6  -3   81.24    9.65   0
   3   6   3   89.32   11.83   0
   3  -6   3   67.37    4.80   0
  -3  -6  -3   94.42   12.65   0
   3   6   4   59.99   10.14   0
  -3   6  -4   52.31    7.51   0
  -3   6  -4   64.95    8.29   0
  -3  -6  -4   57.11   10.71   0
  -3   6  -5   77.96    8.64   0
  -3   6  -5   58.03    7.41   0
   3   6   5   84.41   12.50   0
  -3  -6  -5   55.07   10.49   0
  -3   6  -6  108.81    8.48   0
  -3   6  -6  101.49    8.19   0
   3   6   6  126.93   15.35   0
  -3  -6  -6  104.16   14.19   0
  -3   6  -7  165.13   10.10   0
   3   6   7  166.79   14.87   0
  -3   6  -7  135.61    9.33   0
   3   6   7  147.15   16.55   0
  -3  -6  -7  139.50   16.75   0
  -3   6  -8   25.69    4.44   0
  -3   6  -8   29.37    4.83   0
   3   6   8   20.07    6.65   0
   3   6   8   20.69    6.66   0
  -3  -6  -8   21.90    7.38   0
   3   6   9    6.42    5.38   0
  -3   6  -9   -0.78    2.04   0
   3   6   9    4.79    5.10   0
  -3  -6  -9   11.96    6.14   0
  -3   6 -10    4.70    2.39   0
   3   6  10    2.81    3.87   0
  -3  -6 -10    3.43    5.59   0
   3   6  11    1.69    4.44   0
  -3   6 -11    4.94    2.55   0
  -3  -6 -11   10.50    6.12   0
  -3  -6 -12   12.28    6.84   0
  -3  -6 -13    2.79    6.91   0
  -3  -6 -14    2.94    6.40   0
   3   7 -14   -1.95    3.43   0
   3  -7 -14   -1.29    5.54   0
   3   7 -13    3.94    3.72   0
   3  -7 -13   -2.27    5.51   0
   3   7 -12    4.72    4.56   0
  -3   7  12    6.61    6.28   0
   3  -7 -12   13.04    8.12   0
   3   7 -11    5.84    4.10   0
  -3   7  11    6.30    6.60   0
   3  -7 -11    0.75    4.52   0
   3   7 -10    7.20    4.35   0
  -3   7  10    5.23    6.21   0
   3  -7 -10    1.96    5.30   0
  -3   7   9    2.58    5.06   0
   3   7  -9   19.67    5.79   0
   3  -7  -9    8.25    6.32   0
   3   7  -8   82.70   10.99   0
  -3   7   8   70.58   13.00   0
   3  -7  -8   67.41   12.39   0
  -3   7   7   92.62   14.50   0
   3   7  -7  106.62   12.24   0
   3  -7  -7   91.72   14.39   0
   3   7  -6   13.47    5.72   0
   3   7  -6   -0.01    3.63   0
  -3   7   6    9.32    6.34   0
   3  -7  -6    8.00    5.77   0
  -3   7   5   45.85   10.02   0
   3   7  -5   42.79    8.39   0
   3   7  -5   53.96    9.21   0
  -3  -7   5   56.16    6.62   0
   3  -7  -5   43.80    9.56   0
  -3   7   4    3.65    4.36   0
   3   7  -4    1.94    3.75   0
  -3  -7   4    5.47    3.02   0
   3  -7  -4    3.84    4.24   0
  -3   7   3    6.68    4.79   0
   3   7  -3    8.57    4.82   0
   3  -7  -3   -2.26    2.93   0
  -3  -7   3    3.11    2.97   0
  -3   7   2   11.57    5.47   0
   3   7  -2   13.14    5.35   0
  -3  -7   2   13.84    4.96   0
   3  -7  -2    7.58    4.29   0
   3   7  -1  104.48   13.79   0
  -3   7   1   76.94   11.54   0
  -3  -7   1   85.88   11.49   0
   3  -7  -1   97.11   11.80   0
   3   7   0   15.80    6.06   0
  -3   7   0   14.28    6.03   0
  -3  -7   0   16.46    5.46   0
   3  -7   0    9.00    4.05   0
  -3   7  -1    2.94    3.89   0
   3   7   1   -5.38    2.42   0
  -3  -7  -1   -0.29    3.28   0
   3  -7   1    3.28    2.97   0
  -3   7  -2   32.95    7.27   0
   3   7   2   46.69    9.57   0
  -3  -7  -2   69.98   11.17   0
   3  -7   2   58.18    7.16   0
   3   7   3   -5.23    3.02   0
  -3   7  -3   -1.12    3.35   0
   3  -7   3    0.70    1.27   0
  -3  -7  -3   -3.47    2.64   0
  -3   7  -4    2.98    3.36   0
   3   7   4    0.36    4.19   0
  -3   7  -4    1.52    3.29   0
  -3  -7  -4   -2.36    3.58   0
  -3   7  -5   95.82   10.85   0
  -3   7  -5   90.77   10.39   0
   3   7   5   80.22   12.91   0
  -3  -7  -5  113.21   15.94   0
  -3   7  -6   22.59    5.44   0
   3   7   6   21.53    7.66   0
  -3  -7  -6    5.04    5.04   0
   3   7   7   20.33    6.99   0
   3   7   7   23.03    7.71   0
  -3   7  -7   32.44    6.24   0
  -3  -7  -7   15.47    6.81   0
   3   7   8    2.57    4.80   0
   3   7   8    4.73    4.98   0
  -3   7  -8    2.17    3.04   0
  -3  -7  -8    2.36    5.06   0
   3   7   9   15.36    7.12   0
  -3   7  -9   15.07    4.22   0
   3   7   9    7.50    6.25   0
  -3  -7  -9    9.19    5.94   0
   3   7  10    6.60    5.97   0
  -3   7 -10    9.64    3.76   0
   3   7  10   22.09    7.54   0
  -3  -7 -10   -1.48    3.98   0
   3   7  11   -0.07    4.44   0
  -3   7 -11    5.21    3.37   0
  -3  -7 -11   11.52    7.31   0
  -3  -7 -12    7.28    6.87   0
  -3  -7 -13    1.96    6.33   0
  -3   8  12    6.60    7.42   0
   3   8 -12    9.09    5.27   0
   3  -8 -12   -6.80    5.57   0
   3   8 -11    1.32    4.57   0
  -3   8  11   -2.67    5.59   0
   3  -8 -11   -3.65    5.14   0
   3   8 -10    6.68    5.02   0
  -3   8  10   -1.12    5.02   0
   3  -8 -10    0.27    5.32   0
  -3   8   9   -4.08    4.87   0
   3   8  -9    6.92    5.03   0
   3  -8  -9    1.95    5.93   0
   3   8  -8    6.19    4.90   0
  -3   8   8   16.24    8.08   0
   3  -8  -8   18.69    7.65   0
   3   8  -7   -1.52    3.18   0
  -3   8   7    0.10    4.12   0
   3  -8  -7    0.89    5.05   0
   3   8  -6   13.55    5.99   0
  -3   8   6   11.40    6.38   0
   3   8  -6   15.01    5.87   0
   3  -8  -6    8.39    5.82   0
   3   8  -5   17.23    6.15   0
   3   8  -5   28.06    7.78   0
  -3   8   5   13.10    6.38   0
   3  -8  -5   16.13    7.02   0
  -3   8   4    7.37    5.77   0
   3   8  -4   14.87    6.05   0
  -3  -8   4   14.05    4.64   0
   3  -8  -4    4.60    4.36   0
  -3   8   3   28.61    8.41   0
   3   8  -3   50.30    9.99   0
   3  -8  -3   57.14   10.79   0
  -3  -8   3   50.03    8.50   0
  -3   8   2   39.11    9.27   0
   3   8  -2   22.06    7.73   0
  -3  -8   2   31.20    6.94   0
   3  -8  -2   33.74    8.25   0
  -3   8   1   40.45    9.62   0
   3   8  -1   22.31    7.13   0
   3  -8  -1   28.85    7.32   0
  -3  -8   1   22.92    6.96   0
   3   8   0   -0.70    3.66   0
  -3   8   0   -0.01    3.97   0
   3  -8   0   -1.03    2.92   0
  -3  -8   0   -3.68    3.22   0
   3   8   1    0.64    3.98   0
  -3   8  -1    2.83    4.09   0
  -3  -8  -1   13.73    5.61   0
   3  -8   1   15.36    4.78   0
   3   8   2    0.43    4.26   0
  -3   8  -2    3.23    4.64   0
   3  -8   2    1.38    2.58   0
  -3  -8  -2    1.15    4.60   0
  -3   8  -3   -1.26    3.29   0
   3   8   3   13.29    6.86   0
  -3  -8  -3    7.11    5.68   0
  -3   8  -4   -2.74    3.45   0
   3   8   4    2.50    4.42   0
  -3  -8  -4   -4.03    3.96   0
  -3   8  -5   50.25    8.72   0
   3   8   5   60.38   11.87   0
  -3  -8  -5   51.00   11.47   0
  -3   8  -6    5.42    3.89   0
   3   8   6   17.90    7.64   0
  -3  -8  -6   21.22    8.14   0
   3   8   7    0.82    5.33   0
  -3   8  -7    3.61    3.53   0
   3   8   7    5.59    5.96   0
  -3  -8  -7    4.04    5.32   0
   3   8   8   79.68   14.40   0
  -3   8  -8   66.77    9.22   0
   3   8   8   58.72   12.32   0
  -3  -8  -8   61.81   13.30   0
  -3   8  -9    3.02    3.45   0
   3   8   9   -2.68    4.75   0
   3   8   9   -2.79    5.52   0
  -3  -8  -9   -1.20    5.02   0
   3   8  10    9.37    6.92   0
   3   8  10   13.89    7.39   0
  -3   8 -10   13.40    4.81   0
  -3  -8 -10   10.67    7.53   0
   3   8  11    1.78    5.65   0
  -3  -8 -11   -7.94    4.36   0
  -3   9  11    9.88    7.36   0
   3   9 -11    2.53    4.80   0
   3  -9 -11    1.61    7.91   0
   3   9 -10    2.25    4.21   0
  -3   9  10   -4.71    5.70   0
   3  -9 -10    5.08    6.04   0
   3   9  -9   -2.77    4.22   0
  -3   9   9    7.48    7.08   0
   3  -9  -9   -6.76    4.47   0
  -3   9   8   38.79   11.49   0
   3   9  -8   28.94    8.69   0
   3  -9  -8   26.49    9.69   0
   3   9  -7    9.89    5.68   0
  -3   9   7    8.21    6.93   0
   3  -9  -7    6.25    5.70   0
   3   9  -6   36.33    8.96   0
  -3   9   6   16.39    8.26   0
   3   9  -6   10.92    5.88   0
   3  -9  -6   16.35    7.02   0
   3   9  -5    2.08    4.79   0
   3   9  -5   -1.01    4.28   0
  -3   9   5   -0.11    5.56   0
   3  -9  -5   -3.75    4.03   0
  -3   9   4   70.58   13.55   0
   3   9  -4   73.34   12.57   0
   3   9  -4   66.91   11.93   0
   3  -9  -4   79.50   13.45   0
   3   9  -3    1.66    4.56   0
  -3   9   3   -0.63    4.82   0
   3  -9  -3   -0.06    4.02   0
  -3  -9   3   -3.12    4.25   0
  -3   9   2   -1.86    3.54   0
   3   9  -2   -2.78    3.87   0
  -3  -9   2    4.14    3.85   0
   3  -9  -2    0.01    3.83   0
  -3   9   1    7.56    5.45   0
   3   9  -1    0.48    4.66   0
   3  -9  -1    2.99    3.92   0
  -3  -9   1    4.00    3.94   0
  -3   9   0    5.67    5.10   0
   3   9   0    5.43    5.57   0
  -3  -9   0   -2.61    3.22   0
   3  -9   0    0.36    3.52   0
   3   9   1   -3.53    4.01   0
  -3   9  -1    0.44    4.60   0
  -3  -9  -1   -2.68    3.29   0
   3   9   2   23.22    8.54   0
  -3   9  -2   35.90    8.88   0
  -3  -9  -2   23.88    8.14   0
   3   9   3    4.52    5.57   0
  -3   9  -3    4.62    4.71   0
  -3  -9  -3   -5.48    3.99   0
   3   9   4   11.09    6.24   0
  -3   9  -4   20.78    6.55   0
  -3  -9  -4    6.57    6.34   0
   3   9   5    3.62    5.53   0
  -3   9  -5    3.29    4.43   0
  -3  -9  -5    0.80    4.42   0
  -3   9  -6   32.81    8.08   0
   3   9   6   36.52   10.51   0
   3   9   6   16.82    8.10   0
  -3  -9  -6   14.00    7.59   0
   3   9   7    9.29    7.33   0
   3   9   7    3.93    6.71   0
  -3   9  -7   -3.49    3.46   0
  -3  -9  -7    1.10    4.82   0
   3   9   8   25.23    9.69   0
   3   9   8   18.08    8.45   0
  -3   9  -8   28.20    7.08   0
  -3  -9  -8   30.51   10.44   0
  -3   9  -9   17.86    5.95   0
   3   9   9   12.81    8.23   0
   3   9   9   11.24    7.81   0
  -3  -9  -9   13.48    7.77   0
   3   9  10   10.16    8.11   0
  -3   9 -10    7.28    4.45   0
   3   9  10    1.25    6.90   0
  -3  -9 -10    3.28    7.65   0
   3  10  -9   15.42    7.44   0
  -3  10   9    7.47    7.78   0
   3 -10  -9   15.45    9.81   0
  -3  10   8   -4.85    6.02   0
   3  10  -8    0.66    5.80   0
   3 -10  -8    3.91    6.44   0
  -3  10   7   -2.85    6.45   0
   3  10  -7    5.33    6.29   0
   3 -10  -7    2.06    5.97   0
   3  10  -6    6.99    5.88   0
  -3  10   6   -1.46    6.38   0
   3  10  -6   -1.23    5.01   0
   3 -10  -6    6.50    6.71   0
   3  10  -5   -2.28    5.00   0
   3  10  -5    4.15    5.11   0
  -3  10   5   -1.51    5.49   0
   3 -10  -5   -0.99    5.35   0
  -3  10   4   44.15   11.70   0
   3  10  -4   57.49   12.02   0
   3  10  -4   77.85   14.36   0
   3 -10  -4   62.70   12.87   0
   3  10  -3    8.73    6.51   0
   3  10  -3   -0.52    5.44   0
  -3  10   3    8.85    6.43   0
   3 -10  -3    5.23    6.05   0
  -3  10   2    3.00    5.63   0
   3  10  -2   -2.84    4.65   0
   3 -10  -2   -0.41    3.63   0
  -3  10   1    2.85    5.35   0
   3  10  -1   15.23    7.72   0
  -3 -10   1    8.57    5.39   0
   3 -10  -1    4.87    7.46   0
  -3  10   0    0.62    4.55   0
   3  10   0    0.01    5.13   0
  -3 -10   0    7.06    5.56   0
  -3  10  -1    2.88    5.26   0
   3  10   1   -5.17    3.99   0
  -3 -10  -1    2.63    4.83   0
   3  10   2    6.27    6.97   0
  -3  10  -2    2.84    5.23   0
  -3 -10  -2   -3.71    4.40   0
  -3  10  -3   11.55    6.60   0
   3  10   3    0.99    6.35   0
  -3 -10  -3   10.18    7.01   0
   3  10   4    1.80    6.85   0
  -3  10  -4   12.94    6.64   0
  -3 -10  -4   15.25    7.35   0
   3  10   5   35.97   10.98   0
   3  10   5   28.38   10.50   0
  -3  10  -5   23.86    7.12   0
  -3 -10  -5   46.40   11.98   0
   3  10   6    4.36    6.55   0
  -3  10  -6    0.77    4.58   0
   3  10   6   10.64    8.10   0
  -3 -10  -6    1.68    5.41   0
   3  10   7   -3.64    5.67   0
  -3  10  -7    7.33    5.08   0
   3  10   7    7.43    8.84   0
  -3 -10  -7    2.88    6.00   0
   3  10   8   11.19    8.29   0
  -3  10  -8    3.26    4.77   0
   3  10   8    7.46    8.01   0
  -3 -10  -8    3.89    6.94   0
  -3  11   6   17.03   10.52   0
   3  11  -6   22.90    9.21   0
   3  11  -6   30.12    9.53   0
   3 -11  -6   20.56    9.28   0
  -3  11   5    1.88    6.22   0
   3  11  -5    5.21    6.63   0
   3  11  -5   -0.78    6.10   0
   3 -11  -5    1.82    6.01   0
   3  11  -4   -0.31    5.86   0
  -3  11   4   -0.59    7.17   0
   3  11  -4    6.84    8.19   0
   3 -11  -4    5.05    5.81   0
   3  11  -3    3.90    6.09   0
   3  11  -3    4.16    6.86   0
  -3  11   3    3.09    5.73   0
  -3  11   2   21.53    9.34   0
   3  11  -2    9.75    8.61   0
   3  11  -2    4.15    7.46   0
   3  11  -1   -5.32    5.24   0
  -3  11   1   -1.13    5.06   0
   3  11  -1    4.35    6.54   0
   3  11   0    8.21    7.44   0
  -3  11   0    7.93    6.94   0
   3  11   0   -0.42    5.10   0
  -3  11  -1   -0.26    5.06   0
   3  11   1   -3.20    4.29   0
   3  11   1   -0.01    5.75   0
   3  11   2  103.26   18.27   0
  -3  11  -2   63.78   13.15   0
   3  11   2   79.17   15.21   0
  -3 -11  -2   63.06   13.38   0
   3  11   3    9.44    8.60   0
   3  11   3    6.16    7.42   0
  -3  11  -3   -1.03    5.09   0
  -3 -11  -3   -5.64    4.86   0
   3  11   4   12.16    8.63   0
   3  11   4   29.31   11.71   0
  -3  11  -4    6.88    6.33   0
  -3 -11  -4   12.10    7.95   0
  -3  11  -5   -1.00    5.09   0
   3  11   5    0.54    7.71   0
   3  11   5   11.34    9.15   0
  -3 -11  -5    6.00    6.60   0
   4   0 -17    1.62    4.80   0
   4   0 -16   10.48    6.06   0
   4   0 -15   -0.16    3.89   0
   4   0 -14    7.16    4.99   0
   4   0 -13   -3.14    3.05   0
   4   0 -12  127.24   13.82   0
   4   0 -11   -3.84    2.26   0
  -4   0  11    0.00    0.85   0
   4   0 -11    2.69    3.27   0
  -4   0  10   66.11    5.46   0
   4   0 -10   77.10    9.81   0
   4   0 -10   76.36    9.67   0
   4   0  -9    0.31    2.38   0
  -4   0   9    1.84    1.96   0
   4   0  -9    5.01    3.08   0
   4   0  -8  784.80   32.72   0
  -4   0   8  814.40   30.95   0
   4   0  -8  793.13   33.06   0
   4   0  -7    4.91    2.79   0
  -4   0   7   -1.11    1.76   0
   4   0  -7    1.36    2.58   0
  -4   0   7    2.76    2.20   0
   4   0  -6  104.17    8.29   0
   4   0  -6  114.34    8.45   0
  -4   0   6  110.59    7.76   0
  -4   0   6  111.36    7.82   0
  -4   0   5   -1.68    1.89   0
   4   0  -5    3.08    2.65   0
   4   0  -5    0.62    2.30   0
  -4   0   5    3.00    2.46   0
   4   0  -4   81.87    6.61   0
  -4   0   4   84.58    6.66   0
  -4   0   4   82.09    6.34   0
   4   0  -4   82.15    6.77   0
  -4   0   3    5.35    2.76   0
   4   0  -3    5.10    2.79   0
  -4   0   3    3.35    2.25   0
   4   0  -3    5.35    2.73   0
   4   0  -2 3160.10  105.75   0
  -4   0   2 3176.42  105.64   0
  -4   0   2 3159.30  105.85   0
   4   0  -2 3203.43  105.85   0
  -4   0   1    4.65    2.61   0
  -4   0   1    6.34    2.51   0
   4   0  -1    1.58    2.22   0
   4   0  -1    4.49    2.47   0
   4   0   0 1425.45   48.64   0
  -4   0   0 1410.34   48.71   0
  -4   0   0 1414.20   48.84   0
   4   0   0 1353.16   48.42   0
  -4   0  -1    1.54    1.89   0
   4   0   1   -1.21    1.62   0
   4   0   1    0.43    1.67   0
  -4   0  -1    0.71    1.96   0
  -4   0  -2   30.75    4.02   0
  -4   0  -2   22.00    3.76   0
   4   0   2   29.53    3.62   0
   4   0   2   24.21    3.41   0
   4   0   3    0.95    1.30   0
  -4   0  -3    1.38    1.69   0
   4   0   3    0.97    1.43   0
  -4   0  -3   -0.16    1.78   0
  -4   0  -4  410.27   16.37   0
   4   0   4  377.27   14.15   0
  -4   0  -4  364.87   15.85   0
  -4   0  -5    3.61    2.11   0
  -4   0  -5    7.40    2.59   0
  -4   0  -6  967.98   35.65   0
  -4   0  -6  959.76   35.44   0
  -4   0  -7    1.26    2.08   0
  -4   0  -7    3.23    2.13   0
  -4   0  -7    0.84    2.04   0
  -4   0  -8    6.26    2.91   0
  -4   0  -8    1.95    2.41   0
  -4   0  -9    0.76    2.53   0
  -4   0  -9    1.06    2.24   0
  -4   0 -10    7.86    3.42   0
  -4   0 -10    4.76    3.18   0
  -4   0 -11    0.35    2.77   0
  -4   0 -11   -0.71    2.81   0
  -4   0 -12   73.48    9.69   0
  -4   0 -13    2.47    3.60   0
  -4   0 -14    3.78    3.79   0
  -4   0 -15   -3.87    3.36   0
  -4   0 -16    5.97    5.14   0
   4   1 -17    2.86    4.21   0
   4  -1 -17   -0.89    5.66   0
   4   1 -16   -4.73    3.12   0
   4  -1 -16    1.74    4.47   0
   4   1 -15   -4.38    2.67   0
   4  -1 -15    1.87    4.20   0
   4   1 -14   13.77    5.57   0
   4  -1 -14   21.73    7.02   0
   4   1 -13   21.35    5.92   0
   4  -1 -13   13.47    5.92   0
   4   1 -12   -0.66    2.97   0
   4   1 -12   -2.61    2.26   0
  -4   1  12    1.87    2.01   0
   4  -1 -12   -2.03    2.84   0
  -4   1  11   23.53    4.80   0
   4   1 -11   28.17    6.30   0
   4   1 -11   11.91    4.28   0
   4  -1 -11   16.62    5.60   0
   4   1 -10    0.71    2.58   0
  -4   1  10    7.18    3.28   0
   4   1 -10    1.24    2.77   0
   4  -1 -10    2.32    3.46   0
   4   1  -9   57.44    7.75   0
  -4   1   9   64.36    7.63   0
   4   1  -9   75.07    8.70   0
   4  -1  -9   49.09    7.91   0
  -4  -1   9   68.71    4.59   0
   4  -1  -9   48.13    7.83   0
  -4   1   8  162.28   10.70   0
   4   1  -8  166.48   10.92   0
   4   1  -8  152.68   10.45   0
  -4  -1   8  163.77    8.59   0
   4  -1  -8  167.31   12.10   0
  -4  -1   8  172.69    8.78   0
   4  -1  -8  175.39   12.00   0
   4   1  -7  601.50   25.68   0
  -4   1   7  618.23   26.26   0
   4   1  -7  608.53   25.90   0
   4  -1  -7  615.36   27.42   0
   4  -1  -7  631.08   27.22   0
  -4  -1   7  650.66   24.01   0
  -4  -1   7  581.21   23.57   0
  -4   1   6   76.71    8.50   0
   4   1  -6   69.24    7.56   0
   4   1  -6   72.93    6.55   0
   4  -1  -6   83.46    9.56   0
   4  -1  -6   74.34    8.69   0
  -4  -1   6   55.85    5.27   0
  -4  -1   6   74.78    5.70   0
  -4   1   5   80.44    7.04   0
  -4   1   5   69.20    7.40   0
   4   1  -5   53.56    6.14   0
   4   1  -5   72.63    7.56   0
   4  -1  -5   68.62    7.98   0
   4  -1  -5   56.59    7.00   0
  -4  -1   5   56.58    5.19   0
  -4  -1   5   59.91    6.24   0
   4   1  -4  139.20    8.73   0
  -4   1   4  132.80    8.81   0
   4   1  -4  130.93    8.56   0
  -4   1   4  142.75    9.32   0
   4  -1  -4  140.40    9.34   0
  -4  -1   4  134.84    8.04   0
   4  -1  -4  127.67    8.91   0
  -4  -1   4  141.29    8.40   0
   4   1  -3  156.49    9.17   0
   4   1  -3  155.40    9.38   0
  -4   1   3  153.36    9.50   0
  -4   1   3  155.72    9.73   0
   4  -1  -3  174.99   10.05   0
   4  -1  -3  177.36   10.24   0
  -4  -1   3  172.64    9.44   0
  -4  -1   3  172.62    9.24   0
  -4   1   2  480.36   19.45   0
  -4   1   2  486.49   19.78   0
   4   1  -2  428.73   18.90   0
   4   1  -2  448.16   19.14   0
   4  -1  -2  516.87   19.70   0
  -4  -1   2  412.38   18.56   0
  -4  -1   2  416.88   18.89   0
   4  -1  -2  499.92   19.64   0
   4   1  -1  899.13   32.46   0
  -4   1   1  893.29   32.22   0
   4   1  -1  900.63   32.60   0
  -4   1   1  819.71   32.11   0
   4  -1  -1  794.24   31.70   0
   4  -1  -1  866.67   32.06   0
  -4  -1   1  887.05   32.33   0
  -4  -1   1  926.22   32.78   0
  -4   1   0  322.02   13.97   0
   4   1   0  321.55   14.53   0
   4   1   0  318.27   14.33   0
  -4   1   0  335.08   14.24   0
   4  -1   0  318.41   13.69   0
  -4  -1   0  325.46   14.77   0
  -4  -1   0  308.97   14.36   0
   4  -1   0  326.63   13.90   0
  -4   1  -1  185.80    8.90   0
   4   1   1  159.36    9.04   0
   4   1   1  169.75    9.37   0
  -4   1  -1  160.93    8.41   0
   4  -1   1  161.87    8.10   0
   4  -1   1  174.48    8.35   0
  -4  -1  -1  172.52    9.54   0
  -4  -1  -1  182.22    9.82   0
   4   1   2    9.02    2.89   0
  -4   1  -2    8.12    2.38   0
   4   1   2   13.63    3.27   0
  -4   1  -2   12.72    2.46   0
  -4  -1  -2   17.16    3.52   0
  -4  -1  -2    9.69    3.00   0
   4  -1   2   11.97    1.98   0
   4  -1   2   16.83    2.32   0
  -4   1  -3  214.86    9.25   0
  -4   1  -3  209.61    9.13   0
   4   1   3  194.12   10.29   0
   4   1   3  190.13   10.22   0
  -4  -1  -3  215.27   11.09   0
  -4  -1  -3  187.34   10.80   0
  -4   1  -4  450.15   17.34   0
  -4   1  -4  436.54   17.24   0
   4   1   4  465.31   19.01   0
   4   1   4  493.74   19.28   0
  -4  -1  -4  482.49   20.04   0
  -4  -1  -4  460.66   20.09   0
   4   1   5   10.53    2.84   0
   4   1   5   11.62    2.90   0
  -4   1  -5    9.67    2.11   0
  -4   1  -5    6.73    1.99   0
  -4  -1  -5   15.53    3.66   0
  -4  -1  -5   17.10    3.99   0
  -4  -1  -5   10.55    3.46   0
   4   1   6  140.13    7.69   0
   4   1   6  131.30    7.49   0
  -4   1  -6  143.48    7.17   0
  -4   1  -6  134.92    7.19   0
  -4  -1  -6  134.56    9.29   0
  -4  -1  -6  130.64    9.43   0
   4   1   7   13.09    2.73   0
   4   1   7    7.78    1.99   0
  -4   1  -7   13.91    2.67   0
  -4   1  -7   13.71    2.87   0
  -4  -1  -7    8.85    3.54   0
  -4  -1  -7   14.33    3.87   0
   4   1   8   18.42    2.20   0
   4   1   8   19.16    2.22   0
  -4   1  -8   21.82    3.64   0
  -4   1  -8   20.47    3.56   0
  -4  -1  -8    8.87    3.72   0
  -4  -1  -8   26.04    5.28   0
  -4   1  -9   33.59    4.83   0
  -4   1  -9   34.21    4.85   0
  -4  -1  -9   30.37    6.07   0
  -4  -1  -9   23.56    5.47   0
  -4   1 -10    5.98    3.18   0
  -4   1 -10    9.01    2.96   0
  -4  -1 -10   14.61    4.98   0
  -4  -1 -10    6.87    3.93   0
  -4   1 -11   36.61    5.68   0
  -4   1 -11   39.24    5.94   0
  -4  -1 -11   31.75    6.84   0
  -4  -1 -11   31.47    6.73   0
  -4   1 -12    3.47    3.18   0
  -4  -1 -12    0.03    3.85   0
  -4   1 -13    2.46    3.56   0
  -4  -1 -13   10.08    5.74   0
  -4   1 -14   -0.39    3.25   0
  -4  -1 -14    0.96    4.64   0
  -4   1 -15   12.87    5.29   0
  -4  -1 -15    3.13    4.62   0
  -4   1 -16   -2.69    3.82   0
  -4  -1 -16    3.67    4.63   0
   4   2 -17    5.01    5.15   0
   4  -2 -17   -0.76    5.69   0
   4   2 -16   12.76    5.04   0
   4  -2 -16    9.53    6.49   0
   4   2 -15   17.01    5.72   0
   4  -2 -15   22.56    7.63   0
   4   2 -14    1.21    3.11   0
   4  -2 -14    7.14    6.03   0
   4   2 -13    8.04    3.95   0
   4  -2 -13   -4.00    3.24   0
   4   2 -12   42.25    7.49   0
   4   2 -12   21.73    5.99   0
  -4   2  12   35.46    6.27   0
   4  -2 -12   46.28    9.54   0
   4   2 -11   43.15    7.23   0
   4   2 -11   32.48    6.12   0
  -4   2  11   33.24    6.22   0
   4  -2 -11   30.20    8.09   0
   4   2 -10   66.21    8.10   0
   4   2 -10   52.64    7.44   0
  -4   2  10   38.84    7.05   0
   4  -2 -10   49.93    9.32   0
   4   2  -9    6.07    3.25   0
  -4   2   9   18.19    5.12   0
   4   2  -9    8.51    3.49   0
   4  -2  -9   13.73    5.20   0
   4   2  -8   32.11    5.49   0
   4   2  -8   41.46    6.19   0
  -4   2   8   36.32    6.65   0
  -4  -2   8   37.49    2.57   0
   4  -2  -8   37.48    7.12   0
  -4  -2   8   34.97    2.53   0
   4   2  -7   77.95    6.78   0
  -4   2   7   83.97    9.77   0
   4   2  -7   70.32    7.86   0
   4  -2  -7   58.50    8.34   0
  -4  -2   7   68.27    4.69   0
  -4  -2   7   66.90    4.66   0
  -4   2   6   14.98    4.65   0
   4   2  -6   15.67    3.94   0
   4   2  -6   15.71    3.96   0
  -4  -2   6   16.77    3.10   0
   4  -2  -6   12.27    4.11   0
  -4  -2   6   15.31    3.04   0
  -4  -2   6   16.30    3.06   0
   4  -2  -6   13.48    4.45   0
  -4   2   5  151.61   10.55   0
   4   2  -5  132.25    8.94   0
   4   2  -5  148.78    9.13   0
  -4  -2   5  140.23    8.16   0
   4  -2  -5  144.35   10.60   0
  -4  -2   5  141.99    8.27   0
   4   2  -4  131.17    8.53   0
  -4   2   4  124.80    9.10   0
  -4   2   4  129.26    9.63   0
   4   2  -4  110.07    8.06   0
  -4  -2   4  129.33    7.86   0
   4  -2  -4  131.83    9.61   0
  -4  -2   4  115.75    7.81   0
   4  -2  -4  134.88    9.49   0
   4   2  -3    0.29    1.98   0
  -4   2   3    2.73    2.41   0
   4   2  -3   -1.19    2.01   0
  -4   2   3    0.47    2.68   0
   4  -2  -3   -0.29    2.08   0
  -4  -2   3    1.92    2.21   0
  -4  -2   3    0.70    2.27   0
   4  -2  -3    1.24    2.24   0
  -4   2   2   49.12    6.36   0
   4   2  -2   40.19    5.60   0
  -4   2   2   32.46    5.51   0
   4   2  -2   39.97    5.51   0
   4  -2  -2   50.21    6.51   0
   4  -2  -2   43.93    5.96   0
  -4  -2   2   44.15    5.52   0
  -4  -2   2   49.76    6.04   0
  -4   2   1   39.66    5.58   0
  -4   2   1   48.04    5.96   0
   4   2  -1   41.78    5.75   0
   4   2  -1   46.89    6.03   0
   4  -2  -1   45.01    5.83   0
   4  -2  -1   46.99    5.76   0
  -4  -2   1   34.78    5.11   0
  -4  -2   1   40.96    5.65   0
  -4   2   0   18.53    3.68   0
   4   2   0   10.99    3.65   0
   4   2   0   19.01    4.45   0
  -4   2   0   17.84    3.63   0
   4  -2   0   13.95    3.25   0
  -4  -2   0   11.34    3.33   0
   4  -2   0   14.15    3.08   0
  -4  -2   0   15.12    4.03   0
  -4  -2   0   13.34    3.58   0
  -4   2  -1   96.52    6.51   0
   4   2   1   98.97    7.59   0
   4   2   1  114.50    7.97   0
  -4   2  -1  100.17    6.49   0
  -4  -2  -1  104.05    7.77   0
  -4  -2  -1   98.19    7.62   0
   4  -2   1   97.90    5.89   0
  -4  -2  -1  108.91    8.05   0
   4  -2   1   90.88    5.80   0
   4   2   2  188.49   11.06   0
   4   2   2  200.17   11.22   0
  -4   2  -2  211.48    9.45   0
  -4   2  -2  203.57    9.47   0
  -4  -2  -2  185.15   11.12   0
   4  -2   2  188.23    7.63   0
  -4  -2  -2  191.25   11.21   0
  -4  -2  -2  196.76   11.70   0
   4   2   3   56.54    6.70   0
  -4   2  -3   49.27    3.80   0
  -4   2  -3   43.95    3.76   0
   4   2   3   41.31    6.03   0
  -4  -2  -3   63.21    7.51   0
  -4  -2  -3   55.25    7.15   0
   4   2   4   98.16    7.77   0
  -4   2  -4  103.12    5.25   0
   4   2   4  116.60    8.18   0
  -4   2  -4   94.65    5.13   0
  -4  -2  -4   96.59    8.17   0
  -4  -2  -4  100.28    8.29   0
  -4   2  -5    2.14    1.03   0
   4   2   5    0.43    1.84   0
  -4   2  -5    0.82    0.93   0
  -4  -2  -5    2.22    2.94   0
  -4  -2  -5    3.63    2.91   0
   4   2   6  220.12   12.54   0
  -4   2  -6  223.55    8.85   0
  -4   2  -6  226.51    8.84   0
  -4  -2  -6  233.18   14.16   0
  -4  -2  -6  265.11   14.47   0
  -4   2  -7    8.99    1.57   0
   4   2   7    3.76    2.64   0
  -4   2  -7   10.70    1.85   0
  -4  -2  -7   13.52    4.64   0
  -4  -2  -7    4.08    3.21   0
  -4   2  -8   -0.87    0.96   0
  -4   2  -8    0.41    1.09   0
   4   2   8   -0.56    1.96   0
  -4  -2  -8    1.36    2.70   0
  -4  -2  -8    0.85    2.96   0
   4   2   9   42.81    5.55   0
  -4   2  -9   39.23    3.60   0
  -4   2  -9   49.45    3.89   0
  -4  -2  -9   41.96    7.59   0
  -4  -2  -9   45.22   11.80   0
  -4   2 -10   -2.63    1.42   0
   4   2  10   -0.14    1.08   0
  -4   2 -10   -1.70    1.54   0
  -4  -2 -10    1.04    3.20   0
  -4   2 -11    8.20    2.72   0
  -4   2 -11    4.24    2.65   0
  -4  -2 -11    5.99    4.12   0
  -4   2 -12    7.48    2.92   0
  -4  -2 -12    2.47    3.90   0
  -4   2 -13    0.65    2.63   0
  -4  -2 -13    3.59    4.82   0
  -4   2 -14    3.47    3.12   0
  -4  -2 -14   -0.62    4.11   0
  -4   2 -15    4.87    3.57   0
  -4  -2 -15   -5.63    4.24   0
   4   3 -16   10.76    5.21   0
   4  -3 -16    4.14    6.12   0
   4   3 -15    4.19    4.07   0
   4  -3 -15   -1.99    4.80   0
   4   3 -14    1.01    3.04   0
   4  -3 -14    4.42    5.53   0
   4   3 -13    1.94    3.30   0
   4  -3 -13    8.03    6.08   0
  -4   3  12   -0.29    3.09   0
   4   3 -12   -0.38    2.79   0
   4  -3 -12    0.56    4.79   0
  -4   3  11   -0.64    2.86   0
   4   3 -11    4.98    3.11   0
   4   3 -11   -1.89    2.35   0
   4  -3 -11    7.36    5.18   0
   4   3 -10    2.97    2.64   0
   4   3 -10   -0.56    2.44   0
  -4   3  10    4.07    3.43   0
   4  -3 -10    0.37    3.19   0
   4   3  -9    8.76    3.51   0
  -4   3   9   12.01    4.78   0
   4   3  -9    9.83    3.57   0
   4  -3  -9    8.31    4.45   0
   4   3  -8   12.55    3.87   0
  -4   3   8    3.72    3.35   0
   4   3  -8    3.99    2.67   0
   4  -3  -8    8.86    4.53   0
   4   3  -7   23.02    4.62   0
  -4   3   7   14.79    4.96   0
   4   3  -7   13.25    3.69   0
   4  -3  -7   17.21    5.65   0
  -4  -3   7   13.89    2.11   0
  -4  -3   7   15.87    2.20   0
   4   3  -6  136.69    9.19   0
   4   3  -6  119.58    8.86   0
  -4   3   6  127.10   10.75   0
  -4  -3   6  129.78    7.19   0
  -4  -3   6  120.46    7.12   0
   4  -3  -6  121.51   13.08   0
   4   3  -5  203.24   11.69   0
   4   3  -5  183.58   11.24   0
  -4   3   5  202.78   13.33   0
  -4  -3   5  194.85   10.02   0
  -4  -3   5  189.37   10.08   0
   4  -3  -5  173.64   12.65   0
   4   3  -4  154.11   10.06   0
  -4   3   4  168.51   11.80   0
   4   3  -4  149.02    9.85   0
  -4  -3   4  149.78    8.99   0
   4  -3  -4  170.47   11.66   0
  -4  -3   4  146.23    9.13   0
   4   3  -3   64.90    7.32   0
  -4   3   3   62.81    7.86   0
  -4   3   3   53.82    7.55   0
   4   3  -3   80.31    6.87   0
  -4  -3   3   72.50    6.21   0
   4  -3  -3   72.85    9.46   0
  -4  -3   3   75.04    6.57   0
   4  -3  -3   73.18    8.71   0
  -4   3   2    6.54    3.26   0
   4   3  -2    7.21    3.11   0
  -4   3   2    1.86    2.67   0
   4   3  -2   10.16    3.58   0
   4  -3  -2    8.78    3.62   0
  -4  -3   2    6.30    2.70   0
  -4  -3   2    8.58    3.51   0
   4  -3  -2    4.66    2.97   0
   4   3  -1   20.11    4.60   0
   4   3  -1   22.26    4.72   0
  -4   3   1   26.18    4.80   0
  -4   3   1   17.68    4.31   0
  -4  -3   1   17.31    4.30   0
  -4  -3   1   10.89    3.66   0
   4  -3  -1   25.74    4.55   0
   4  -3  -1   18.92    4.19   0
   4   3   0   95.78    7.98   0
   4   3   0   88.01    7.79   0
  -4   3   0   91.32    7.58   0
  -4   3   0  101.65    7.36   0
  -4  -3   0   86.88    7.99   0
  -4  -3   0   97.16    7.83   0
   4  -3   0   96.67    6.95   0
   4  -3   0   88.71    6.67   0
   4   3   1  165.79   11.35   0
  -4   3  -1  171.76   10.17   0
  -4   3  -1  191.26   10.10   0
   4   3   1  174.74   11.16   0
   4  -3   1  181.79    9.15   0
  -4  -3  -1  181.38   11.26   0
   4  -3   1  173.17    9.12   0
  -4  -3  -1  194.18   12.08   0
   4   3   2   37.19    6.50   0
  -4   3  -2   47.05    5.20   0
  -4   3  -2   41.21    5.05   0
  -4  -3  -2   46.90    7.33   0
   4  -3   2   38.83    3.04   0
  -4  -3  -2   37.52    6.50   0
  -4   3  -3   79.25    5.67   0
  -4   3  -3   77.34    5.47   0
   4   3   3   88.84    9.76   0
  -4  -3  -3   86.18    9.83   0
  -4  -3  -3  103.44   10.65   0
  -4   3  -4   49.55    3.89   0
  -4   3  -4   48.63    3.92   0
   4   3   4   55.68    7.82   0
  -4  -3  -4   54.70    8.19   0
   4   3   5   57.01    7.69   0
  -4   3  -5   57.59    3.66   0
  -4   3  -5   51.57    3.58   0
  -4  -3  -5   48.76    7.74   0
   4   3   6    3.03    3.06   0
  -4   3  -6    1.58    0.97   0
  -4   3  -6    2.25    0.93   0
  -4  -3  -6    0.81    3.05   0
   4   3   7  104.21    9.09   0
  -4  -3  -7  119.60   12.90   0
   4   3   8   17.14    4.80   0
  -4  -3  -8   37.32    8.01   0
   4   3   9   10.81    4.02   0
  -4  -3  -9   21.21    6.73   0
   4   3  10   29.44    5.70   0
  -4  -3 -10   33.82    8.18   0
  -4   3 -11   57.37    4.03   0
  -4   3 -11   48.69    3.88   0
  -4  -3 -11   52.75   10.40   0
  -4   3 -12    1.99    1.90   0
  -4  -3 -12    7.14    5.62   0
  -4   3 -13    0.35    2.15   0
  -4  -3 -13    3.67    4.83   0
  -4  -3 -14    3.48    5.18   0
  -4  -3 -15   11.89    6.63   0
   4   4 -16   11.50    4.93   0
   4  -4 -16   -1.78    6.00   0
   4   4 -15    6.28    4.12   0
   4  -4 -15    5.32    6.96   0
   4   4 -14   10.09    4.41   0
   4  -4 -14   10.97    7.61   0
   4   4 -13   -3.43    2.78   0
  -4   4  13    2.62    4.50   0
   4  -4 -13    6.40    6.00   0
   4   4 -12   48.55    7.74   0
  -4   4  12   47.32    9.04   0
   4  -4 -12   18.40    7.24   0
  -4   4  11    1.60    4.20   0
   4   4 -11    5.99    3.64   0
   4  -4 -11    6.07    5.32   0
   4   4 -10    1.66    2.83   0
  -4   4  10    5.10    4.35   0
   4   4 -10    7.69    3.86   0
   4  -4 -10   -0.04    3.71   0
   4   4  -9   -1.71    2.05   0
  -4   4   9    1.84    4.12   0
   4   4  -9    2.74    2.90   0
   4  -4  -9    2.79    3.76   0
   4   4  -8   56.00    7.61   0
   4   4  -8   41.95    6.64   0
  -4   4   8   38.98    8.14   0
   4  -4  -8   44.87    8.91   0
  -4   4   7   -0.87    3.13   0
   4   4  -7   -0.96    1.97   0
   4   4  -7    3.01    2.68   0
   4  -4  -7    0.44    3.53   0
   4   4  -6  287.92   15.37   0
   4   4  -6  275.16   15.11   0
  -4  -4   6  279.16   12.33   0
   4  -4  -6  268.55   17.71   0
  -4  -4   6  263.94   12.30   0
  -4   4   5  131.54   11.76   0
   4   4  -5  111.21    9.29   0
   4   4  -5  133.23    9.71   0
   4  -4  -5  139.67   11.73   0
  -4  -4   5  127.74    8.08   0
  -4  -4   5  127.59    8.22   0
   4   4  -4   -2.04    2.26   0
   4   4  -4   -0.48    2.18   0
  -4   4   4   -0.38    3.04   0
   4  -4  -4    6.12    3.83   0
  -4  -4   4   -2.59    1.56   0
   4   4  -3   62.37    7.89   0
  -4   4   3   45.31    7.45   0
   4   4  -3   47.66    7.33   0
   4  -4  -3   34.26    6.58   0
  -4  -4   3   48.48    6.56   0
  -4   4   2  271.75   15.80   0
   4   4  -2  254.83   14.56   0
   4   4  -2  247.15   14.67   0
  -4   4   2  250.31   15.40   0
  -4  -4   2  262.55   14.52   0
   4  -4  -2  255.80   14.94   0
  -4   4   1   23.84    5.36   0
   4   4  -1   23.83    5.07   0
   4   4  -1   18.02    5.11   0
   4   4  -1   16.22    4.85   0
  -4   4   1   12.46    4.32   0
  -4  -4   1   14.64    4.44   0
   4  -4  -1   12.20    4.07   0
  -4   4   0   85.86    9.09   0
  -4   4   0   64.68    8.35   0
   4   4   0   88.90   10.18   0
   4   4   0  101.98   11.20   0
  -4  -4   0   66.03    8.51   0
   4  -4   0   80.70    8.32   0
   4  -4   0   64.80    7.57   0
  -4   4  -1   14.48    4.12   0
  -4   4  -1    5.00    2.67   0
   4   4   1   -0.11    3.02   0
   4   4   1    9.06    4.15   0
   4  -4   1   12.68    3.48   0
  -4  -4  -1    8.09    3.84   0
   4  -4   1   14.00    3.26   0
  -4   4  -2  388.50   17.68   0
   4   4   2  365.78   19.76   0
  -4   4  -2  376.17   17.26   0
  -4  -4  -2  387.46   20.35   0
   4  -4   2  399.13   15.28   0
   4  -4   2  353.85   14.90   0
  -4   4  -3   64.85    7.10   0
   4   4   3   79.90    9.38   0
  -4   4  -3   65.61    6.89   0
   4   4   3   66.67    8.93   0
  -4  -4  -3   72.47    9.85   0
  -4   4  -4   32.86    4.45   0
   4   4   4   34.73    7.09   0
   4   4   4   49.58    8.23   0
  -4   4  -4   34.72    4.65   0
  -4  -4  -4   33.96    7.28   0
  -4   4  -5   51.27    5.11   0
   4   4   5   34.00    7.14   0
  -4   4  -5   43.00    4.80   0
  -4  -4  -5   41.20    7.93   0
   4   4   6    3.88    3.35   0
  -4   4  -6   -0.23    1.35   0
  -4   4  -6    0.62    1.36   0
  -4  -4  -6    0.32    3.05   0
   4   4   7  107.28   12.14   0
  -4   4  -7  125.79    6.16   0
  -4   4  -7  130.28    6.28   0
  -4  -4  -7  132.29   14.92   0
  -4   4  -8   53.06    3.15   0
   4   4   8   38.38    7.49   0
  -4  -4  -8   48.56    9.20   0
   4   4   9   -2.08    2.26   0
  -4  -4  -9    0.23    3.44   0
   4   4  10   11.55    4.90   0
  -4  -4 -10   10.35    5.58   0
  -4  -4 -11    1.39    4.64   0
  -4  -4 -12   18.42    7.52   0
  -4  -4 -13    8.66    6.00   0
  -4  -4 -14   -2.06    4.43   0
  -4  -4 -15    3.88    6.40   0
   4   5 -15    1.44    3.54   0
   4  -5 -15   -1.48    6.41   0
   4   5 -14    1.07    3.66   0
   4  -5 -14    2.16    5.71   0
   4   5 -13   14.45    4.97   0
  -4   5  13   14.54    6.36   0
   4  -5 -13    7.09    6.09   0
   4   5 -12    4.53    4.00   0
  -4   5  12    7.19    5.23   0
   4  -5 -12    3.81    5.47   0
   4   5 -11    8.19    4.30   0
  -4   5  11   14.57    6.47   0
   4  -5 -11    2.73    4.71   0
  -4   5  10   75.63   12.47   0
   4   5 -10   70.66    9.31   0
   4  -5 -10   88.64   14.47   0
   4   5  -9   10.13    4.18   0
   4   5  -9    6.86    3.67   0
  -4   5   9    2.51    4.90   0
   4  -5  -9    9.97    5.80   0
  -4   5   8   60.39   10.44   0
   4   5  -8   51.93    7.84   0
   4   5  -8   48.77    7.55   0
   4  -5  -8   61.25   11.62   0
   4   5  -7  256.09   14.92   0
  -4   5   7  238.13   17.57   0
   4   5  -7  223.08   14.15   0
   4  -5  -7  206.86   16.99   0
   4   5  -6  178.42   12.26   0
  -4   5   6  163.27   14.31   0
   4   5  -6  178.50   11.94   0
  -4  -5   6  151.83    8.74   0
   4  -5  -6  167.32   14.16   0
  -4   5   5    7.14    4.74   0
   4   5  -5   -0.14    2.70   0
   4   5  -5    7.55    3.72   0
  -4  -5   5   -0.54    1.77   0
   4  -5  -5    4.66    4.06   0
   4   5  -4   60.07    8.30   0
   4   5  -4   64.40    9.22   0
  -4   5   4   57.62   10.00   0
   4  -5  -4   48.63    8.86   0
  -4  -5   4   57.49    7.43   0
   4   5  -3  293.24   18.35   0
  -4   5   3  301.02   18.80   0
   4   5  -3  289.77   17.03   0
   4   5  -3  301.44   17.21   0
   4  -5  -3  328.46   18.56   0
  -4  -5   3  288.47   15.90   0
  -4   5   2   10.48    4.74   0
   4   5  -2   23.72    5.76   0
   4   5  -2   24.42    5.85   0
  -4  -5   2   18.95    5.01   0
   4  -5  -2   24.25    6.09   0
   4   5  -1    4.88    3.56   0
   4   5  -1   -1.22    2.48   0
  -4   5   1    3.80    3.29   0
   4  -5  -1    0.89    2.63   0
  -4  -5   1   -0.82    2.59   0
  -4   5   0   92.17   10.45   0
  -4   5   0   96.24   10.37   0
   4   5   0   98.26   11.26   0
   4   5   0   76.97   10.45   0
  -4  -5   0   86.96   10.47   0
   4  -5   0   86.60    7.93   0
   4   5   1   46.90    8.07   0
  -4   5  -1   63.79    8.20   0
  -4   5  -1   42.66    6.94   0
   4   5   1   39.31    7.75   0
  -4  -5  -1   46.26    8.30   0
   4  -5   1   46.11    6.08   0
  -4   5  -2    1.88    2.58   0
   4   5   2    6.33    3.78   0
  -4   5  -2    1.81    2.78   0
   4   5   2    3.29    3.30   0
   4  -5   2    4.91    2.21   0
   4  -5   2    4.67    2.11   0
  -4  -5  -2    3.56    3.80   0
   4   5   3   10.57    4.71   0
   4   5   3    6.76    4.03   0
  -4   5  -3    0.67    2.68   0
  -4   5  -3    3.11    2.73   0
  -4  -5  -3    0.54    3.47   0
  -4   5  -4   11.91    3.55   0
   4   5   4   21.44    6.11   0
  -4   5  -4   10.75    3.54   0
   4   5   4   12.06    4.99   0
  -4  -5  -4    6.16    5.11   0
   4   5   5    1.84    3.12   0
  -4   5  -5    1.00    2.14   0
   4   5   5    0.52    3.33   0
  -4   5  -5   -0.74    1.87   0
  -4  -5  -5    3.83    3.61   0
  -4   5  -6   42.53    5.62   0
   4   5   6   55.98    9.49   0
  -4   5  -6   43.68    5.53   0
   4   5   6   45.35    8.60   0
  -4  -5  -6   63.36   11.09   0
  -4   5  -7  383.47   16.10   0
  -4   5  -7  390.63   16.33   0
   4   5   7  339.99   21.43   0
  -4  -5  -7  388.22   23.99   0
  -4   5  -8   34.45    4.21   0
  -4   5  -8   38.51    4.38   0
   4   5   8   46.92    9.13   0
  -4  -5  -8   39.73    9.54   0
   4   5   9    3.91    3.83   0
  -4   5  -9   -0.50    1.38   0
  -4   5  -9   -2.08    1.36   0
  -4  -5  -9    0.05    4.45   0
   4   5  10    0.09    3.46   0
  -4   5 -10    2.68    1.59   0
  -4  -5 -10    1.17    4.44   0
  -4  -5 -11    2.63    4.88   0
  -4  -5 -12   10.47    7.36   0
  -4  -5 -13    3.98    6.37   0
  -4  -5 -14    3.72    6.55   0
   4   6 -15    5.71    4.84   0
   4  -6 -15   10.32    8.20   0
   4   6 -14    3.74    3.86   0
   4  -6 -14    0.94    5.43   0
  -4   6  13    7.97    6.39   0
   4   6 -13    6.47    4.62   0
   4  -6 -13    5.05    6.15   0
   4   6 -12    4.34    4.01   0
  -4   6  12   13.60    6.79   0
   4  -6 -12   24.55    9.74   0
   4   6 -11    7.44    4.11   0
  -4   6  11   11.08    6.59   0
   4  -6 -11    4.48    5.67   0
   4   6 -10   25.30    6.31   0
  -4   6  10   35.11    9.01   0
   4  -6 -10    5.48    5.67   0
  -4   6   9    0.24    4.21   0
   4   6  -9    3.67    3.57   0
   4  -6  -9    5.08    5.05   0
   4   6  -8  140.57   11.86   0
   4   6  -8  166.62   12.71   0
  -4   6   8  164.29   18.35   0
   4  -6  -8  132.28   17.19   0
   4   6  -7   83.34   10.70   0
   4   6  -7   96.81   11.55   0
  -4   6   7  105.13   14.72   0
   4  -6  -7  100.57   14.39   0
   4   6  -6   78.17   10.34   0
   4   6  -6   93.27   12.08   0
  -4   6   6   86.58   13.05   0
  -4  -6   6   73.52    5.96   0
   4  -6  -6   73.82   12.18   0
   4   6  -5  224.44   15.11   0
  -4   6   5  191.04   16.69   0
   4  -6  -5  221.82   17.04   0
  -4  -6   5  226.97   12.60   0
  -4   6   4    2.22    3.35   0
   4   6  -4    9.89    4.25   0
   4   6  -4    4.72    3.80   0
  -4  -6   4    9.34    3.58   0
   4  -6  -4   10.53    5.34   0
   4   6  -3   15.09    4.86   0
   4   6  -3    7.06    3.95   0
  -4   6   3    3.64    4.04   0
   4  -6  -3   15.66    5.25   0
  -4  -6   3    7.18    3.65   0
   4   6  -2    3.68    3.53   0
   4   6  -2    6.95    4.06   0
  -4   6   2    5.29    4.37   0
  -4  -6   2    6.40    3.79   0
   4  -6  -2    6.73    4.00   0
   4   6  -1   14.51    4.84   0
   4   6  -1    6.30    4.00   0
  -4   6   1   15.70    5.71   0
   4  -6  -1   16.74    4.95   0
  -4  -6   1   27.41    6.22   0
   4   6   0   48.54    8.70   0
   4   6   0   39.52    7.86   0
  -4   6   0   56.76    9.00   0
   4  -6   0   53.12    7.59   0
  -4  -6   0   63.50   10.10   0
   4   6   1    0.76    3.67   0
  -4   6  -1   -0.01    2.78   0
   4   6   1   12.23    5.25   0
  -4  -6  -1    5.32    4.49   0
   4  -6   1    6.17    2.91   0
  -4   6  -2   33.63    6.95   0
   4   6   2   35.68    7.86   0
  -4   6  -2   38.36    7.11   0
   4   6   2   33.62    7.55   0
   4  -6   2   43.73    5.45   0
  -4  -6  -2   23.37    6.80   0
   4   6   3   37.16    8.37   0
  -4   6  -3   49.71    7.62   0
   4   6   3   40.76    8.61   0
  -4   6  -3   42.76    7.17   0
   4  -6   3   39.59    3.03   0
  -4  -6  -3   33.55    7.84   0
   4  -6   3   35.98    2.91   0
   4   6   4    1.62    3.82   0
   4   6   4    6.05    4.62   0
  -4   6  -4   -2.05    2.41   0
  -4   6  -4   -0.51    2.32   0
  -4  -6  -4    2.07    3.42   0
  -4   6  -5  293.25   15.49   0
   4   6   5  315.53   20.35   0
  -4   6  -5  255.76   15.13   0
   4   6   5  298.68   20.08   0
  -4  -6  -5  272.37   19.90   0
  -4   6  -6  214.91   12.40   0
   4   6   6  180.81   15.96   0
   4   6   6  211.63   16.88   0
  -4   6  -6  242.65   13.08   0
  -4  -6  -6  182.44   16.74   0
   4   6   7    2.13    4.01   0
  -4   6  -7   -1.83    1.89   0
   4   6   7    0.97    3.56   0
  -4   6  -7    0.24    2.17   0
  -4  -6  -7    1.31    4.09   0
  -4   6  -8    3.90    2.62   0
   4   6   8    1.02    4.10   0
  -4  -6  -8    2.55    4.23   0
  -4   6  -9    1.14    2.17   0
   4   6   9    0.16    3.42   0
  -4  -6  -9   -1.78    3.70   0
   4   6  10    1.73    4.20   0
  -4   6 -10    1.73    2.14   0
  -4  -6 -10   -0.55    4.89   0
  -4  -6 -11    6.23    5.53   0
  -4  -6 -12    3.42    5.96   0
  -4  -6 -13    1.20    6.29   0
   4   7 -14   10.84    5.73   0
   4  -7 -14    2.70    5.43   0
  -4   7  13    2.05    6.27   0
   4   7 -13    1.97    4.31   0
   4  -7 -13   -3.61    4.60   0
  -4   7  12    7.60    6.73   0
   4   7 -12    5.85    4.33   0
   4  -7 -12    5.37    6.60   0
   4   7 -11    1.25    4.04   0
  -4   7  11    3.09    6.26   0
   4  -7 -11   -2.15    4.99   0
  -4   7  10   -1.68    4.62   0
   4   7 -10   -4.14    3.13   0
   4  -7 -10    3.29    5.34   0
   4   7  -9   -0.06    3.89   0
  -4   7   9   -3.47    4.44   0
   4  -7  -9    5.33    5.45   0
   4   7  -8    0.21    3.49   0
  -4   7   8    8.95    6.63   0
   4  -7  -8    2.88    5.35   0
   4   7  -7   25.05    6.72   0
  -4   7   7   25.42    8.37   0
   4  -7  -7   10.82    6.20   0
   4   7  -6  116.19   13.65   0
  -4   7   6  115.13   16.44   0
  -4  -7   6   99.90    7.35   0
   4  -7  -6   98.03   14.08   0
   4   7  -5   21.76    6.29   0
  -4   7   5   34.82    9.12   0
   4   7  -5   19.70    6.02   0
   4  -7  -5   26.54    7.61   0
  -4  -7   5   25.78    5.27   0
  -4   7   4    0.76    4.50   0
   4   7  -4    3.77    4.63   0
   4   7  -4   -0.14    3.22   0
   4  -7  -4    3.36    4.39   0
  -4  -7   4    1.02    2.61   0
  -4   7   3   19.09    6.76   0
   4   7  -3   21.19    6.28   0
   4   7  -3   24.75    7.26   0
  -4  -7   3   21.27    5.70   0
   4  -7  -3   15.99    5.92   0
   4   7  -2    0.83    3.94   0
  -4   7   2    2.08    3.80   0
   4   7  -2    2.63    4.30   0
   4  -7  -2    4.54    3.79   0
  -4  -7   2    7.20    4.41   0
  -4   7   1   19.94    6.60   0
   4   7  -1   31.02    7.46   0
   4   7  -1   15.71    5.88   0
  -4  -7   1   26.78    6.90   0
   4  -7  -1   20.48    5.85   0
   4   7   0   28.00    7.93   0
   4   7   0   26.97    7.38   0
  -4   7   0    4.90    4.31   0
   4  -7   0    9.84    4.04   0
  -4  -7   0   18.90    6.04   0
   4   7   1   88.74   13.01   0
  -4   7  -1   82.51   11.46   0
   4   7   1   70.79   11.63   0
  -4  -7  -1   73.72   11.98   0
   4  -7   1   63.09    8.15   0
  -4   7  -2   -0.01    3.30   0
   4   7   2    3.95    4.42   0
   4   7   2    4.14    4.23   0
  -4  -7  -2    1.90    4.06   0
   4  -7   2    1.92    2.16   0
   4   7   3   50.34   10.24   0
   4   7   3   40.10    9.19   0
  -4   7  -3   31.95    6.81   0
  -4  -7  -3   30.88    8.60   0
   4  -7   3   36.08    3.91   0
  -4   7  -4   85.77   10.51   0
   4   7   4   84.13   13.30   0
   4   7   4   63.06   11.59   0
  -4   7  -4   84.63   10.66   0
  -4  -7  -4   69.35   11.82   0
  -4   7  -5  116.36   10.20   0
  -4   7  -5   95.17   10.85   0
   4   7   5   98.76   14.53   0
   4   7   5  111.07   15.32   0
  -4  -7  -5  134.25   17.04   0
  -4   7  -6   -1.18    2.70   0
   4   7   6    0.57    3.70   0
   4   7   6   -2.12    3.42   0
  -4  -7  -6    1.54    4.22   0
  -4   7  -7   22.14    5.20   0
   4   7   7   24.73    7.74   0
   4   7   7    3.67    5.12   0
  -4  -7  -7   17.61    7.52   0
   4   7   8    7.01    5.11   0
  -4   7  -8    1.92    2.78   0
   4   7   8   10.81    6.45   0
  -4  -7  -8   -1.94    4.09   0
  -4   7  -9    3.85    3.04   0
   4   7   9    4.04    5.12   0
  -4  -7  -9    6.30    6.13   0
  -4   7 -10    3.81    3.03   0
   4   7  10    0.63    5.05   0
  -4  -7 -10    3.07    6.16   0
  -4  -7 -11    3.24    6.04   0
  -4  -7 -12   12.18    7.95   0
  -4   8  12    3.00    6.26   0
   4   8 -12    2.47    3.95   0
   4  -8 -12   -0.83    5.09   0
   4   8 -11   15.89    6.64   0
  -4   8  11   -1.02    6.04   0
   4  -8 -11    9.66    6.92   0
   4   8 -10   45.00    9.20   0
  -4   8  10   43.81   11.29   0
   4  -8 -10   41.72   11.76   0
  -4   8   9   90.41   15.80   0
   4   8  -9  107.78   14.19   0
   4  -8  -9   73.97   15.00   0
  -4   8   8   17.45    7.70   0
   4   8  -8    4.57    5.03   0
   4  -8  -8   24.86    9.00   0
   4   8  -7   92.49   12.92   0
  -4   8   7   80.30   14.55   0
   4  -8  -7  104.90   16.28   0
  -4   8   6   75.31   13.46   0
   4   8  -6   81.41   12.38   0
   4  -8  -6   77.86   13.52   0
   4   8  -5    1.14    3.92   0
  -4   8   5    3.73    5.64   0
   4   8  -5    5.89    4.88   0
   4  -8  -5   -0.58    4.59   0
  -4   8   4   34.10    9.59   0
   4   8  -4   32.01    7.92   0
   4   8  -4   29.18    7.76   0
   4  -8  -4   29.97    7.90   0
  -4  -8   4   35.16    6.96   0
  -4   8   3   -1.15    4.44   0
   4   8  -3   -0.49    3.21   0
   4   8  -3    7.56    5.12   0
  -4  -8   3   -1.68    2.78   0
   4  -8  -3    1.89    4.29   0
   4   8  -2    2.85    5.05   0
   4   8  -2    0.62    4.27   0
  -4   8   2    4.40    4.78   0
   4  -8  -2    2.54    3.94   0
  -4  -8   2    0.70    3.85   0
   4   8  -1    0.25    3.75   0
   4   8  -1    4.79    4.66   0
  -4   8   1    0.71    4.10   0
  -4  -8   1    2.29    3.71   0
   4  -8  -1    5.78    4.69   0
   4   8   0   12.43    6.30   0
   4   8   0   18.07    7.03   0
  -4   8   0    8.43    5.51   0
  -4  -8   0    3.46    4.20   0
   4  -8   0    9.58    4.74   0
  -4   8  -1   -0.42    4.07   0
   4   8   1    8.23    4.71   0
   4   8   1   -2.82    3.42   0
   4  -8   1    4.72    3.45   0
  -4  -8  -1    3.59    4.35   0
  -4   8  -2    0.62    3.96   0
   4   8   2    8.80    5.72   0
   4   8   2   -2.47    3.92   0
   4  -8   2    2.34    2.69   0
  -4  -8  -2    4.73    4.91   0
   4   8   3   19.71    7.38   0
  -4   8  -3   20.11    6.61   0
   4   8   3   27.86    8.47   0
  -4  -8  -3   13.02    7.06   0
  -4   8  -4   29.22    7.09   0
   4   8   4   24.66    8.25   0
   4   8   4   40.46   10.46   0
  -4  -8  -4   20.12    7.44   0
   4   8   5    4.76    5.43   0
   4   8   5   11.22    6.73   0
  -4   8  -5    9.38    5.05   0
  -4  -8  -5    1.99    4.58   0
  -4   8  -6    0.54    3.56   0
   4   8   6   10.68    6.58   0
   4   8   6    5.24    5.32   0
  -4  -8  -6    3.71    5.09   0
  -4   8  -7    4.30    3.90   0
   4   8   7   -0.29    4.74   0
   4   8   7    2.90    5.36   0
  -4  -8  -7    0.90    5.02   0
   4   8   8    2.36    5.19   0
  -4   8  -8    2.55    3.60   0
   4   8   8   -1.10    4.75   0
  -4  -8  -8    2.38    5.59   0
  -4   8  -9   16.60    4.90   0
   4   8   9   12.80    7.20   0
  -4  -8  -9   28.62   10.04   0
   4   8  10    0.34    4.95   0
  -4   8 -10   13.25    4.50   0
  -4  -8 -10    6.20    7.81   0
  -4  -8 -11   -3.94    6.00   0
  -4   9  11   -7.77    6.27   0
   4   9 -11    1.05    5.20   0
   4  -9 -11    7.52    7.39   0
  -4   9  10    2.15    7.80   0
   4   9 -10    2.59    4.61   0
   4  -9 -10    6.21    6.76   0
  -4   9   9   15.81    8.86   0
   4   9  -9   11.41    6.22   0
   4  -9  -9    7.98    7.09   0
   4   9  -8   -4.28    3.52   0
  -4   9   8   -1.00    5.93   0
   4  -9  -8   -6.33    5.22   0
   4   9  -7   38.69   10.01   0
  -4   9   7   32.89   10.50   0
   4  -9  -7   49.45   12.34   0
  -4   9   6   10.73    7.17   0
   4   9  -6   -0.17    4.27   0
   4  -9  -6    5.04    6.21   0
   4   9  -5    1.43    5.07   0
   4   9  -5    6.00    5.23   0
  -4   9   5   16.30    7.91   0
   4  -9  -5    6.80    5.99   0
  -4   9   4    7.19    5.65   0
   4   9  -4    3.49    5.45   0
   4   9  -4    1.88    4.68   0
   4  -9  -4    5.64    5.18   0
   4   9  -3   17.34    7.36   0
   4   9  -3    9.18    5.76   0
  -4   9   3    0.67    5.13   0
   4  -9  -3    7.39    4.98   0
  -4  -9   3    8.90    4.79   0
   4   9  -2    2.38    4.32   0
  -4   9   2    5.74    5.53   0
   4   9  -2   17.73    7.52   0
  -4  -9   2    3.15    4.15   0
   4  -9  -2    1.98    4.34   0
  -4   9   1    4.01    5.55   0
   4   9  -1    5.56    6.06   0
   4   9  -1   11.37    6.36   0
  -4  -9   1    0.87    3.74   0
   4  -9  -1    5.63    4.82   0
  -4   9   0   11.31    6.16   0
   4   9   0   11.44    6.76   0
   4   9   0   16.43    7.28   0
   4  -9   0    9.04    4.39   0
  -4  -9   0    0.45    4.19   0
   4   9   1    8.46    6.48   0
   4   9   1   12.25    7.46   0
  -4   9  -1    5.74    5.13   0
  -4  -9  -1   19.77    6.98   0
  -4   9  -2   11.49    6.16   0
   4   9   2    7.56    6.45   0
   4   9   2    5.86    5.98   0
  -4  -9  -2    5.66    5.50   0
   4   9   3   -1.47    5.42   0
  -4   9  -3    5.13    5.03   0
   4   9   3   12.20    6.60   0
  -4  -9  -3   -5.56    3.02   0
   4   9   4   95.02   17.17   0
   4   9   4   85.31   15.48   0
  -4   9  -4   75.06   11.73   0
  -4  -9  -4   85.22   15.01   0
   4   9   5   13.26    7.43   0
   4   9   5    3.36    6.15   0
  -4   9  -5    0.92    3.57   0
  -4  -9  -5   -1.00    5.04   0
   4   9   6    9.39    7.06   0
  -4   9  -6    0.75    4.05   0
   4   9   6   -3.85    4.95   0
  -4  -9  -6    2.86    5.77   0
  -4   9  -7   20.43    6.44   0
   4   9   7   15.72    8.33   0
   4   9   7   17.00    7.83   0
  -4  -9  -7    6.15    7.71   0
   4   9   8    7.41    7.10   0
   4   9   8   16.96    7.47   0
  -4   9  -8   12.29    5.35   0
  -4  -9  -8   18.52    8.97   0
   4   9   9   -0.12    6.31   0
  -4   9  -9    2.83    4.14   0
  -4  -9  -9   -1.18    5.57   0
  -4  10   9   12.96    8.29   0
   4  10  -9   31.53    9.22   0
   4 -10  -9   18.35   10.33   0
  -4  10   8    7.75    8.73   0
   4  10  -8    0.91    6.12   0
   4 -10  -8    2.19    6.45   0
  -4  10   7    5.86    6.81   0
   4  10  -7    4.64    6.79   0
   4 -10  -7    2.64    6.96   0
  -4  10   6    5.15    7.40   0
   4  10  -6    0.09    5.87   0
   4 -10  -6   -1.37    5.22   0
   4  10  -5    8.75    6.93   0
  -4  10   5   44.03   11.61   0
   4 -10  -5   23.43    9.56   0
   4  10  -4    5.58    6.64   0
   4  10  -4    2.38    5.42   0
  -4  10   4    6.74    8.10   0
   4 -10  -4    3.66    5.85   0
  -4  10   3    9.23    6.50   0
   4  10  -3    3.78    5.77   0
   4  10  -3    6.20    6.59   0
   4 -10  -3    5.78    5.74   0
   4  10  -2    6.66    6.68   0
  -4  10   2    5.05    6.25   0
   4  10  -2    3.68    5.48   0
   4 -10  -2    2.40    3.97   0
   4  10  -1   -3.89    5.13   0
   4  10  -1   10.45    6.83   0
  -4  10   1    1.24    5.97   0
  -4 -10   1    2.58    4.75   0
  -4  10   0    1.07    4.97   0
   4  10   0   -6.61    3.53   0
   4  10   0    3.43    5.27   0
  -4 -10   0   -2.57    3.76   0
   4  10   1  107.20   18.06   0
  -4  10  -1   72.90   13.39   0
   4  10   1   48.83   12.14   0
  -4 -10  -1   61.39   11.82   0
  -4  10  -2   26.36    8.90   0
   4  10   2   22.04    8.78   0
   4  10   2   36.11   10.89   0
  -4 -10  -2   48.00   11.73   0
  -4  10  -3    0.14    4.82   0
   4  10   3    8.18    6.48   0
   4  10   3   -4.83    6.21   0
  -4 -10  -3    0.73    5.35   0
  -4  10  -4   -2.70    3.84   0
   4  10   4    2.84    6.31   0
   4  10   4   -4.08    6.22   0
  -4 -10  -4   -5.10    4.60   0
   4  10   5   25.03   10.46   0
   4  10   5   29.19   10.37   0
  -4  10  -5   22.89    7.59   0
  -4 -10  -5    9.05    7.46   0
   4  10   6    2.17    6.06   0
  -4  10  -6    1.32    4.58   0
   4  10   6   -4.63    6.05   0
  -4 -10  -6    9.51    7.85   0
   4  10   7    8.28    6.79   0
  -4  10  -7    6.63    5.21   0
   4  10   7    1.50    6.58   0
  -4 -10  -7   -1.64    5.83   0
   4  11  -5   13.77    8.37   0
  -4  11   5   -1.19    7.59   0
   4 -11  -5    0.23    5.67   0
  -4  11   4   10.39    7.37   0
   4  11  -4    4.55    6.91   0
   4  11  -4    7.10    7.91   0
   4  11  -3   -0.45    3.72   0
  -4  11   3   -5.37    4.78   0
   4  11  -3  -10.32    3.57   0
  -4  11   2   -1.39    6.12   0
   4  11  -2   -1.45    5.90   0
   4  11  -2   -0.92    5.58   0
  -4  11   1   -2.36    5.40   0
   4  11  -1   15.96    8.79   0
   4  11  -1    0.86    5.44   0
  -4  11   0    0.90    5.89   0
   4  11   0   10.13    6.60   0
   4  11   0   28.73   10.22   0
   4  11   1   13.08    7.96   0
  -4  11  -1   -2.73    4.80   0
   4  11   1    3.04    7.83   0
  -4 -11  -1    3.20    5.56   0
   4  11   2   31.79   12.94   0
   4  11   2   19.02    9.22   0
  -4  11  -2   18.37    8.55   0
  -4 -11  -2   17.29    8.01   0
  -4  11  -3    0.06    5.87   0
   4  11   3   -3.50    6.87   0
   4  11   3    5.78    7.37   0
  -4 -11  -3    1.35    6.62   0
   4  11   4   -4.28    7.17   0
   4  11   4    9.07    8.06   0
  -4  11  -4    1.29    5.40   0
  -4 -11  -4    4.58    7.30   0
   5   0 -17   -3.59    3.47   0
   5   0 -16    7.93    5.51   0
   5   0 -15    2.51    4.78   0
   5   0 -14   10.44    5.30   0
   5   0 -13   -1.68    3.17   0
   5   0 -12   39.41    8.16   0
  -5   0  11   -0.23    2.07   0
   5   0 -11   -0.02    2.84   0
   5   0 -10    3.98    3.77   0
   5   0 -10    2.15    2.85   0
  -5   0  10   -1.94    1.70   0
  -5   0   9    2.23    2.29   0
   5   0  -9   -0.65    2.72   0
   5   0  -9   -1.84    2.40   0
   5   0  -8   92.58   10.15   0
  -5   0   8   80.39    7.26   0
   5   0  -8  109.86   11.52   0
  -5   0   7   -2.25    1.66   0
   5   0  -7    0.26    2.41   0
   5   0  -7   -4.76    1.75   0
  -5   0   6  181.92   11.31   0
   5   0  -6  191.64   11.97   0
   5   0  -6  200.12   12.26   0
  -5   0   5   -1.07    1.73   0
   5   0  -5   -0.13    2.31   0
   5   0  -5    2.07    2.60   0
  -5   0   5   -1.64    2.08   0
  -5   0   4   38.50    5.84   0
   5   0  -4   20.84    4.54   0
  -5   0   4   32.94    4.98   0
   5   0  -4   22.51    4.58   0
  -5   0   3   -0.10    2.29   0
   5   0  -3    3.70    2.72   0
   5   0  -3    2.31    2.38   0
  -5   0   3    0.58    2.25   0
   5   0  -2  317.98   15.20   0
  -5   0   2  318.93   15.44   0
  -5   0   2  319.89   15.09   0
   5   0  -2  344.35   15.63   0
   5   0  -1   10.17    3.07   0
  -5   0   1    8.89    3.01   0
  -5   0   1   12.01    3.67   0
   5   0  -1    5.02    2.78   0
   5   0   0 1013.72   38.08   0
  -5   0   0 1034.25   38.56   0
   5   0   0 1055.01   38.28   0
  -5   0   0 1096.66   38.59   0
  -5   0  -1    6.06    2.74   0
   5   0   1    1.64    2.18   0
  -5   0  -1    4.62    2.44   0
   5   0   1    3.22    2.25   0
  -5   0  -2   -0.17    2.15   0
   5   0   2   -0.10    1.62   0
   5   0   2   -0.33    1.61   0
  -5   0  -2    1.13    1.97   0
  -5   0  -3    3.48    2.12   0
   5   0   3    3.46    1.85   0
   5   0   3    0.06    1.57   0
  -5   0  -3    2.27    2.41   0
  -5   0  -4  474.70   20.14   0
   5   0   4  491.23   18.29   0
   5   0   4  491.94   18.35   0
  -5   0  -4  480.73   20.05   0
   5   0   5    4.52    1.19   0
  -5   0  -5    2.86    2.16   0
   5   0   5    3.17    1.13   0
  -5   0  -5    1.09    2.09   0
  -5   0  -6   24.12    4.37   0
  -5   0  -6   26.67    4.50   0
  -5   0  -7    0.00    2.02   0
  -5   0  -7    1.82    1.91   0
  -5   0  -8   44.92    6.25   0
  -5   0  -8   42.61    6.08   0
  -5   0  -8   37.73    5.92   0
  -5   0  -9    2.12    2.74   0
  -5   0  -9   -1.07    2.08   0
  -5   0 -10  112.23    9.37   0
  -5   0 -10  120.76    9.60   0
  -5   0 -11   -0.71    2.54   0
  -5   0 -12   29.48    6.32   0
  -5   0 -13   -0.26    2.90   0
  -5   0 -14   19.00    5.81   0
  -5   0 -15    0.10    4.09   0
   5   1 -17    0.19    4.29   0
   5  -1 -17    0.37    5.18   0
   5   1 -16    2.92    5.01   0
   5  -1 -16    0.56    4.37   0
   5   1 -15   -2.87    3.24   0
   5  -1 -15    0.29    4.41   0
   5   1 -14    7.60    5.20   0
   5  -1 -14    6.97    5.26   0
   5   1 -13   -0.64    3.03   0
   5  -1 -13    0.52    3.61   0
  -5   1  12    1.86    2.74   0
   5   1 -12    4.61    3.65   0
   5  -1 -12    4.98    4.68   0
   5   1 -11    8.99    4.36   0
  -5   1  11    4.71    3.10   0
   5   1 -11    2.11    3.15   0
  -5  -1  11    8.41    1.74   0
   5  -1 -11    1.03    3.58   0
  -5  -1  11    4.74    1.53   0
  -5   1  10   29.76    5.79   0
   5   1 -10   20.37    5.48   0
   5   1 -10   18.52    5.25   0
   5  -1 -10   18.87    5.85   0
  -5  -1  10   19.29    3.29   0
   5   1  -9  521.12   23.93   0
   5   1  -9  466.70   23.17   0
  -5   1   9  495.79   23.17   0
   5  -1  -9  477.21   24.84   0
  -5  -1   9  505.95   20.60   0
   5   1  -8    1.08    2.47   0
  -5   1   8    4.04    2.76   0
   5   1  -8    2.61    2.66   0
  -5  -1   8    1.78    2.05   0
   5  -1  -8   -2.06    2.45   0
  -5   1   7   30.42    5.82   0
   5   1  -7   31.33    5.67   0
   5   1  -7   38.67    6.46   0
  -5  -1   7   27.74    4.83   0
   5  -1  -7   25.87    5.77   0
   5  -1  -7   30.57    6.09   0
   5   1  -6    3.56    2.64   0
  -5   1   6   -0.13    2.40   0
   5   1  -6   -0.22    2.45   0
  -5  -1   6   -1.01    1.81   0
   5  -1  -6    2.36    3.18   0
   5  -1  -6    0.46    2.27   0
  -5  -1   6    0.76    2.21   0
  -5   1   5   51.15    7.06   0
   5   1  -5   56.19    7.05   0
   5   1  -5   62.21    7.73   0
  -5   1   5   49.15    7.06   0
   5  -1  -5   51.56    6.86   0
   5  -1  -5   53.51    7.57   0
  -5  -1   5   64.05    7.18   0
  -5  -1   5   49.68    6.36   0
  -5   1   4   35.53    5.67   0
   5   1  -4   49.48    6.38   0
   5   1  -4   38.90    5.68   0
  -5   1   4   24.87    5.22   0
   5  -1  -4   34.85    5.70   0
   5  -1  -4   38.84    5.97   0
  -5  -1   4   41.26    5.60   0
  -5  -1   4   38.32    5.61   0
  -5   1   3  387.08   18.42   0
   5   1  -3  422.56   18.33   0
   5   1  -3  366.99   17.92   0
  -5   1   3  385.63   18.04   0
  -5  -1   3  414.99   18.26   0
   5  -1  -3  415.01   18.61   0
   5  -1  -3  400.22   18.59   0
  -5  -1   3  401.32   17.92   0
  -5   1   2   73.98    6.61   0
  -5   1   2   83.98    7.03   0
   5   1  -2   88.08    7.23   0
   5   1  -2   92.82    7.04   0
   5  -1  -2   78.05    6.78   0
  -5  -1   2  100.96    7.33   0
  -5  -1   2   84.65    6.92   0
   5  -1  -2   75.97    7.99   0
   5   1  -1 1103.20   41.62   0
  -5   1   1 1171.53   41.82   0
   5   1  -1 1128.97   41.76   0
  -5   1   1 1182.55   41.55   0
   5  -1  -1 1175.07   41.57   0
  -5  -1   1 1101.24   41.70   0
   5  -1  -1 1089.44   41.14   0
  -5  -1   1 1121.99   41.50   0
   5   1   0  284.37   13.74   0
   5   1   0  268.42   13.65   0
  -5   1   0  267.75   13.28   0
  -5   1   0  295.93   13.46   0
   5  -1   0  284.54   13.08   0
  -5  -1   0  262.16   13.49   0
  -5  -1   0  278.06   13.98   0
   5  -1   0  285.18   13.14   0
   5   1   1  493.31   21.09   0
   5   1   1  509.93   21.15   0
  -5   1  -1  478.02   20.40   0
  -5   1  -1  526.69   20.54   0
   5  -1   1  490.69   19.81   0
  -5  -1  -1  535.94   21.73   0
   5  -1   1  514.45   19.95   0
  -5  -1  -1  513.25   21.68   0
  -5   1  -2    3.70    2.11   0
  -5   1  -2    3.59    2.28   0
   5   1   2    3.40    2.54   0
   5   1   2    4.40    2.55   0
   5  -1   2    2.67    1.65   0
  -5  -1  -2    6.18    3.08   0
  -5  -1  -2    4.91    2.81   0
   5  -1   2    4.92    1.94   0
   5   1   3  393.25   17.15   0
  -5   1  -3  376.84   16.02   0
   5   1   3  405.41   17.17   0
  -5   1  -3  360.52   16.00   0
  -5  -1  -3  383.34   17.89   0
  -5  -1  -3  415.16   18.05   0
   5  -1   3  390.21   14.02   0
   5   1   4  404.51   17.75   0
   5   1   4  419.35   17.80   0
  -5   1  -4  423.53   16.78   0
  -5   1  -4  422.34   17.06   0
  -5  -1  -4  416.17   18.89   0
  -5  -1  -4  387.71   18.76   0
   5   1   5  126.54    7.91   0
  -5   1  -5  122.19    7.23   0
   5   1   5  127.53    7.84   0
  -5   1  -5  132.68    7.48   0
  -5  -1  -5  119.12    8.77   0
  -5  -1  -5  125.88    9.37   0
  -5   1  -6  166.44    8.60   0
  -5   1  -6  155.96    8.57   0
   5   1   6  157.69    8.62   0
   5   1   6  152.49    8.59   0
  -5  -1  -6  166.17   10.87   0
  -5  -1  -6  153.58   10.34   0
  -5  -1  -6  162.57   10.58   0
  -5   1  -7   16.47    3.34   0
   5   1   7   12.16    2.68   0
  -5   1  -7   10.59    2.86   0
   5   1   7   11.04    2.33   0
  -5  -1  -7   11.38    4.02   0
  -5  -1  -7   21.02    4.76   0
   5   1   8   54.48    3.24   0
  -5   1  -8   64.57    5.64   0
  -5   1  -8   57.45    6.24   0
   5   1   8   59.72    3.27   0
  -5  -1  -8   64.95    8.46   0
  -5  -1  -8   56.12    8.06   0
  -5   1  -9   93.19    7.15   0
  -5   1  -9   97.94    7.21   0
  -5   1  -9   99.71    7.45   0
  -5  -1  -9   88.54   10.35   0
  -5  -1  -9   99.92   11.05   0
  -5   1 -10    7.16    3.25   0
  -5   1 -10    5.99    3.05   0
  -5  -1 -10    5.64    3.92   0
  -5  -1 -10    7.55    4.04   0
  -5   1 -11    8.56    3.33   0
  -5  -1 -11   13.29    4.81   0
  -5   1 -12   11.18    3.94   0
  -5  -1 -12    5.12    4.37   0
  -5   1 -13    4.26    3.30   0
  -5  -1 -13    1.07    3.48   0
  -5   1 -14    1.59    2.73   0
  -5  -1 -14    5.78    4.07   0
  -5   1 -15   11.33    4.81   0
  -5  -1 -15   14.24    6.56   0
   5   2 -17    5.48    5.03   0
   5  -2 -17    0.11    4.86   0
   5   2 -16   -1.99    3.83   0
   5  -2 -16    0.39    5.18   0
   5   2 -15    2.38    4.19   0
   5  -2 -15    6.42    5.42   0
   5   2 -14   25.86    6.61   0
   5  -2 -14   31.40    9.07   0
   5   2 -13   13.02    4.78   0
   5  -2 -13    9.63    6.10   0
   5   2 -12   84.71   10.42   0
  -5   2  12  108.30   11.56   0
   5  -2 -12   70.33   11.71   0
   5   2 -11   29.28    6.58   0
  -5   2  11   37.52    7.13   0
   5   2 -11   39.49    7.00   0
   5  -2 -11   38.15    8.26   0
   5   2 -10  111.22    9.64   0
   5   2 -10  135.96   10.36   0
  -5   2  10  118.23   10.46   0
   5  -2 -10   85.07   11.89   0
   5   2  -9   14.03    4.67   0
  -5   2   9   11.25    4.42   0
   5   2  -9    9.58    3.66   0
   5  -2  -9   14.70    5.14   0
  -5  -2   9    7.25    2.07   0
   5   2  -8   74.06    8.69   0
  -5   2   8   66.62    9.32   0
   5   2  -8   70.61    8.91   0
  -5  -2   8   76.94    5.55   0
   5  -2  -8   57.40    9.26   0
  -5  -2   8   73.39    5.48   0
  -5  -2   8   75.77    5.59   0
   5   2  -7   36.42    6.36   0
  -5   2   7   31.49    6.44   0
   5   2  -7   40.34    6.12   0
  -5  -2   7   34.17    4.74   0
   5  -2  -7   36.43    7.07   0
  -5  -2   7   41.04    5.37   0
   5   2  -6    0.90    2.28   0
  -5   2   6    3.95    3.46   0
   5   2  -6    6.61    3.13   0
  -5  -2   6    0.12    1.94   0
   5  -2  -6    2.99    3.42   0
  -5  -2   6    2.17    2.40   0
   5   2  -5  161.32   10.54   0
  -5   2   5  154.15   11.32   0
   5   2  -5  187.08   11.21   0
  -5  -2   5  176.58   10.25   0
  -5  -2   5  164.23    9.82   0
   5  -2  -5  164.21   11.63   0
   5   2  -4   79.65    8.63   0
  -5   2   4   47.11    7.05   0
   5   2  -4   55.98    7.36   0
  -5   2   4   68.75    8.31   0
   5  -2  -4   61.61    8.33   0
  -5  -2   4   56.21    6.77   0
   5  -2  -4   57.89    7.68   0
  -5  -2   4   54.14    6.88   0
  -5   2   3    6.72    3.34   0
  -5   2   3    2.43    2.84   0
   5   2  -3    1.59    2.68   0
   5   2  -3    4.32    2.75   0
   5  -2  -3    6.48    3.35   0
  -5  -2   3    2.49    2.40   0
  -5  -2   3    2.46    2.84   0
   5  -2  -3    2.34    2.90   0
   5   2  -2   17.15    4.06   0
   5   2  -2   15.01    4.20   0
  -5   2   2   11.66    3.72   0
  -5   2   2   13.78    3.81   0
  -5  -2   2   24.85    4.64   0
  -5  -2   2   14.28    4.05   0
   5  -2  -2   30.56    5.24   0
   5  -2  -2   18.16    4.16   0
  -5   2   1   58.39    6.89   0
   5   2  -1   56.10    7.02   0
  -5   2   1   50.99    6.38   0
   5   2  -1   47.20    6.34   0
  -5  -2   1   49.00    6.53   0
   5  -2  -1   50.30    6.38   0
  -5  -2   1   57.04    7.11   0
   5  -2  -1   54.50    6.50   0
  -5   2   0  243.96   12.12   0
   5   2   0  226.23   12.83   0
  -5   2   0  241.83   12.44   0
   5   2   0  230.33   12.72   0
   5  -2   0  230.52   11.56   0
  -5  -2   0  229.14   12.95   0
   5  -2   0  222.71   11.56   0
  -5  -2   0  229.12   12.64   0
  -5   2  -1   12.86    3.34   0
  -5   2  -1   10.94    2.96   0
   5   2   1   12.42    3.82   0
   5   2   1    7.21    3.13   0
   5  -2   1   12.56    2.85   0
  -5  -2  -1    8.52    3.82   0
   5  -2   1   11.66    2.87   0
  -5  -2  -1    8.31    3.43   0
   5   2   2  525.91   23.01   0
  -5   2  -2  541.59   21.35   0
   5   2   2  559.68   23.39   0
  -5   2  -2  532.70   21.08   0
  -5  -2  -2  517.67   23.23   0
   5  -2   2  535.66   19.44   0
  -5  -2  -2  509.40   23.06   0
   5  -2   2  528.44   19.36   0
  -5  -2  -2  530.58   23.75   0
   5   2   3  392.91   18.25   0
  -5   2  -3  354.52   15.66   0
  -5   2  -3  367.04   15.66   0
  -5  -2  -3  390.01   18.55   0
  -5  -2  -3  397.08   18.61   0
  -5  -2  -3  379.41   18.75   0
   5   2   4  141.42    9.99   0
  -5   2  -4  161.81    8.10   0
  -5   2  -4  171.77    8.33   0
  -5  -2  -4  141.05   10.82   0
  -5  -2  -4  175.10   11.09   0
  -5  -2  -4  156.91   10.71   0
   5   2   5   15.96    4.14   0
  -5   2  -5   27.83    3.45   0
  -5   2  -5   22.86    3.11   0
  -5  -2  -5   12.53    4.06   0
  -5  -2  -5   21.19    5.06   0
  -5   2  -6   54.01    4.09   0
   5   2   6   55.83    6.99   0
  -5   2  -6   61.58    4.42   0
  -5  -2  -6   74.03    9.30   0
  -5  -2  -6   65.18    8.40   0
   5   2   7    2.69    2.14   0
  -5   2  -7   -0.33    1.19   0
  -5   2  -7    0.87    1.16   0
  -5  -2  -7    0.16    2.63   0
  -5  -2  -7    4.50    3.15   0
   5   2   8   59.18    6.84   0
  -5   2  -8   49.94    4.30   0
  -5   2  -8   53.34    4.18   0
  -5  -2  -8   52.83    8.70   0
  -5  -2  -8   62.37    9.70   0
  -5   2  -9    4.08    1.96   0
   5   2   9    4.96    2.39   0
  -5   2  -9    3.91    2.10   0
  -5  -2  -9    6.93    4.01   0
  -5   2 -10   36.59    4.75   0
  -5   2 -10   38.24    4.83   0
  -5   2 -10   48.87    5.36   0
  -5  -2 -10   34.00    7.22   0
  -5   2 -11    4.84    2.47   0
  -5  -2 -11    5.88    4.49   0
  -5   2 -12    0.39    2.09   0
  -5  -2 -12    3.98    4.39   0
  -5   2 -13    0.06    2.51   0
  -5  -2 -13    1.80    4.21   0
  -5   2 -14   -0.17    2.72   0
  -5  -2 -14    3.87    4.90   0
  -5  -2 -15    0.08    4.31   0
   5   3 -16   12.73    5.90   0
   5  -3 -16    2.04    5.64   0
   5   3 -15   -2.06    3.18   0
   5  -3 -15    6.19    6.28   0
   5   3 -14    8.35    4.62   0
   5  -3 -14   13.79    7.45   0
   5   3 -13   18.38    5.99   0
  -5   3  13   31.50    8.22   0
   5  -3 -13   13.66    6.81   0
   5   3 -12   14.66    4.87   0
  -5   3  12    8.41    4.51   0
   5  -3 -12    7.75    5.91   0
  -5   3  11    7.90    4.66   0
   5   3 -11    2.17    3.18   0
   5   3 -11    4.23    3.84   0
   5  -3 -11    6.25    5.03   0
  -5   3  10   35.75    7.69   0
   5   3 -10   28.30    5.95   0
   5   3 -10   39.68    7.26   0
   5  -3 -10   30.18    8.01   0
   5   3  -9  117.81    9.80   0
  -5   3   9  144.35   14.96   0
   5   3  -9  136.98   10.62   0
   5  -3  -9  142.97   12.92   0
  -5   3   8   16.20    5.33   0
   5   3  -8   25.94    5.44   0
   5   3  -8   17.70    4.70   0
  -5  -3   8   19.24    2.97   0
   5  -3  -8   16.47    5.90   0
   5   3  -7   -0.29    2.04   0
   5   3  -7    0.63    2.56   0
  -5   3   7    2.93    3.25   0
  -5  -3   7    2.42    1.99   0
  -5  -3   7    1.35    1.76   0
   5  -3  -7   -1.02    2.90   0
   5   3  -6   -1.16    2.11   0
  -5   3   6    0.33    2.81   0
   5   3  -6    1.65    2.58   0
   5  -3  -6   -4.37    1.75   0
  -5  -3   6   -2.31    1.68   0
  -5  -3   6    0.80    1.98   0
   5   3  -5  121.78    9.10   0
  -5   3   5  120.37   12.90   0
   5   3  -5  102.60    8.61   0
   5  -3  -5  115.84   10.26   0
  -5  -3   5  106.09    7.96   0
  -5   3   4    6.88    3.62   0
   5   3  -4    2.86    2.99   0
   5   3  -4    9.71    3.44   0
  -5  -3   4    0.10    2.21   0
   5  -3  -4    5.47    3.60   0
  -5   3   3   36.32    6.44   0
   5   3  -3   25.51    5.07   0
   5   3  -3   43.38    6.67   0
   5  -3  -3   41.01    6.63   0
  -5  -3   3   35.60    5.97   0
   5   3  -2    2.81    2.87   0
   5   3  -2    4.67    3.36   0
  -5   3   2   -1.93    2.28   0
  -5   3   2    0.67    2.70   0
   5  -3  -2   -1.81    2.50   0
  -5  -3   2    0.83    2.63   0
  -5   3   1  177.75   11.18   0
  -5   3   1  186.77   11.97   0
   5   3  -1  189.15   12.08   0
   5   3  -1  184.47   11.70   0
   5  -3  -1  169.72   10.75   0
   5  -3  -1  191.47   11.26   0
  -5  -3   1  193.31   12.12   0
   5   3   0   41.69    6.63   0
   5   3   0   51.97    7.18   0
  -5   3   0   55.40    6.74   0
  -5   3   0   48.52    6.49   0
   5  -3   0   46.97    6.00   0
   5  -3   0   46.74    5.93   0
  -5  -3   0   38.44    6.43   0
   5   3   1   31.71    5.94   0
  -5   3  -1   23.44    4.41   0
  -5   3  -1   20.35    4.26   0
   5  -3   1   23.59    3.94   0
  -5  -3  -1   28.15    5.92   0
   5  -3   1   27.71    4.05   0
  -5   3  -2  268.42   12.86   0
  -5   3  -2  278.90   13.32   0
   5   3   2  266.14   15.06   0
  -5  -3  -2  264.47   15.49   0
   5  -3   2  241.65   10.69   0
   5  -3   2  260.14   10.86   0
  -5   3  -3   45.35    5.32   0
   5   3   3   40.29    6.88   0
  -5   3  -3   43.92    5.09   0
  -5  -3  -3   34.47    6.60   0
  -5   3  -4    0.07    1.54   0
  -5   3  -4    2.45    1.66   0
   5   3   4    6.90    3.70   0
  -5  -3  -4    3.01    2.80   0
   5   3   5   54.42    7.99   0
  -5   3  -5   47.78    4.11   0
  -5   3  -5   57.47    4.22   0
  -5  -3  -5   45.68    8.16   0
   5   3   6    2.22    2.66   0
  -5   3  -6    1.56    1.41   0
  -5   3  -6    1.59    1.43   0
  -5  -3  -6    3.30    3.98   0
  -5   3  -7   38.08    3.23   0
   5   3   7   30.63    6.12   0
  -5   3  -7   42.56    3.24   0
  -5  -3  -7   32.88    6.92   0
  -5   3  -8    1.90    1.37   0
  -5   3  -8    0.69    1.01   0
   5   3   8    3.29    2.75   0
  -5  -3  -8    1.47    3.74   0
   5   3   9   18.54    4.86   0
  -5   3  -9   32.98    3.39   0
  -5   3  -9   30.39    3.23   0
  -5  -3  -9   22.18    6.63   0
   5   3  10   11.74    3.98   0
  -5   3 -10    8.98    2.26   0
  -5   3 -10    9.87    2.08   0
  -5  -3 -10   12.83    5.81   0
  -5   3 -11   16.40    2.91   0
  -5  -3 -11   13.34    6.44   0
  -5   3 -12    0.56    1.87   0
  -5  -3 -12   -0.72    4.23   0
  -5   3 -13   -0.34    2.07   0
  -5  -3 -13    4.16    5.04   0
  -5  -3 -14   -0.77    5.49   0
  -5  -3 -15    3.99    5.73   0
   5   4 -16   -2.03    3.30   0
   5  -4 -16   -6.17    4.81   0
   5   4 -15    8.19    5.28   0
   5  -4 -15   -2.24    5.45   0
   5   4 -14   16.23    5.57   0
   5  -4 -14   14.26    7.99   0
   5   4 -13   24.98    6.64   0
  -5   4  13   37.10    8.12   0
   5  -4 -13   30.37    9.34   0
  -5   4  12   -1.02    4.18   0
   5   4 -12    3.87    3.47   0
   5  -4 -12   -2.45    3.34   0
  -5   4  11    7.84    5.29   0
   5   4 -11   17.83    5.41   0
   5  -4 -11   10.92    5.33   0
   5   4 -10   16.27    4.98   0
  -5   4  10   16.59    6.60   0
   5   4 -10   20.07    5.56   0
   5  -4 -10    7.17    5.27   0
  -5   4   9   31.57    8.22   0
   5   4  -9   27.55    5.93   0
   5   4  -9   26.29    5.98   0
   5  -4  -9   23.11    6.66   0
  -5   4   8   53.93    9.63   0
   5   4  -8   51.82    7.89   0
   5   4  -8   41.51    7.17   0
  -5  -4   8   45.67    3.04   0
  -5  -4   8   44.13    2.95   0
   5  -4  -8   34.57    8.23   0
   5   4  -7   32.71    6.33   0
   5   4  -7   31.95    6.12   0
  -5   4   7   18.68    6.15   0
  -5  -4   7   23.21    3.83   0
   5  -4  -7   15.47    5.68   0
  -5  -4   7   25.06    3.93   0
   5   4  -6    3.58    3.13   0
   5   4  -6    2.89    2.95   0
  -5   4   6    6.61    4.37   0
  -5  -4   6   10.89    3.17   0
   5  -4  -6   18.97    6.17   0
   5   4  -5   18.23    4.83   0
  -5   4   5   20.34    5.92   0
   5   4  -5   31.97    6.01   0
  -5  -4   5   22.91    4.51   0
   5  -4  -5   20.34    5.83   0
  -5   4   4   13.60    4.80   0
   5   4  -4    9.78    3.95   0
   5   4  -4   16.22    4.52   0
  -5  -4   4   10.50    3.51   0
   5  -4  -4   22.41    5.87   0
   5   4  -3   20.77    5.16   0
   5   4  -3    2.87    3.10   0
  -5   4   3   15.44    5.16   0
   5  -4  -3   11.22    4.22   0
  -5  -4   3   12.51    4.04   0
  -5   4   2    0.07    2.63   0
   5   4  -2    4.37    3.58   0
  -5  -4   2    5.79    3.27   0
   5  -4  -2    2.56    2.89   0
  -5   4   1   53.09    8.27   0
  -5   4   1   69.24    8.55   0
   5   4  -1   56.06    8.16   0
   5  -4  -1   63.51    8.01   0
  -5  -4   1   63.87    8.78   0
  -5   4   0  148.83   10.67   0
  -5   4   0  173.27   11.69   0
   5   4   0  181.54   12.45   0
  -5  -4   0  167.89   12.04   0
   5  -4   0  174.82   10.58   0
   5   4   1   78.72    9.46   0
  -5   4  -1   79.06    7.03   0
  -5   4  -1   66.73    8.03   0
   5  -4   1   65.32    5.71   0
  -5  -4  -1   74.34    9.49   0
   5  -4   1   68.67    5.96   0
  -5   4  -2   73.74    8.18   0
  -5   4  -2   73.63    6.54   0
   5   4   2  100.81   11.13   0
  -5  -4  -2   72.18    9.58   0
   5  -4   2   70.58    4.85   0
   5  -4   2   63.73    4.79   0
   5   4   3  127.16   10.83   0
  -5   4  -3  122.68    8.41   0
  -5   4  -3  109.80    7.81   0
  -5  -4  -3  108.97   12.41   0
  -5   4  -4  158.80    9.31   0
   5   4   4  167.79   12.77   0
  -5   4  -4  183.49   10.03   0
  -5  -4  -4  163.56   13.30   0
  -5   4  -5    9.85    2.67   0
  -5   4  -5    9.49    2.79   0
   5   4   5    1.75    3.23   0
  -5  -4  -5   -1.63    2.76   0
   5   4   6   76.95   10.10   0
  -5   4  -6   52.24    4.65   0
  -5   4  -6   57.65    4.54   0
  -5  -4  -6   47.51    8.93   0
  -5   4  -7   36.94    4.06   0
  -5   4  -7   40.72    4.13   0
   5   4   7   28.32    6.50   0
  -5  -4  -7   37.40    8.52   0
  -5   4  -8    2.15    1.43   0
   5   4   8    3.09    3.60   0
  -5   4  -8    3.47    1.64   0
  -5  -4  -8    8.12    5.20   0
   5   4   9   -0.76    2.72   0
  -5   4  -9    3.60    1.20   0
  -5   4  -9    2.44    1.27   0
  -5  -4  -9    5.52    4.67   0
   5   4  10   20.15    5.83   0
  -5  -4 -10   24.43    7.73   0
  -5  -4 -11    6.86    5.54   0
  -5  -4 -12   -1.39    4.18   0
  -5  -4 -13    1.59    5.10   0
  -5  -4 -14    8.26    7.20   0
   5   5 -15    7.82    4.83   0
   5  -5 -15   -0.78    5.83   0
   5   5 -14    0.11    3.59   0
   5  -5 -14   -3.54    5.08   0
  -5   5  13   -3.80    4.18   0
   5   5 -13   -0.23    3.54   0
   5  -5 -13   -5.72    4.28   0
  -5   5  12    5.49    4.83   0
   5   5 -12    6.05    4.37   0
   5  -5 -12   -0.34    4.61   0
   5   5 -11   18.20    5.81   0
  -5   5  11   21.33    7.35   0
   5  -5 -11   31.77    9.26   0
  -5   5  10    3.79    4.90   0
   5   5 -10    5.27    3.91   0
   5  -5 -10    6.23    5.69   0
   5   5  -9    6.00    3.92   0
   5   5  -9    2.47    3.04   0
  -5   5   9    5.76    5.45   0
   5  -5  -9    3.19    4.91   0
   5   5  -8  141.68   11.30   0
   5   5  -8  139.57   11.59   0
   5  -5  -8  174.89   18.85   0
  -5   5   7    8.73    5.45   0
   5   5  -7    0.96    2.87   0
   5   5  -7    4.26    3.53   0
   5  -5  -7    3.43    4.56   0
  -5  -5   7    0.86    1.82   0
   5   5  -6   -2.07    2.37   0
  -5   5   6    2.04    3.27   0
   5   5  -6   -0.05    2.97   0
  -5  -5   6    1.01    2.10   0
   5  -5  -6   -0.20    3.46   0
   5   5  -5   29.92    6.36   0
  -5   5   5   46.88    9.44   0
   5   5  -5   27.76    6.80   0
  -5  -5   5   36.09    6.02   0
   5  -5  -5   31.67    7.42   0
  -5   5   4   -2.27    2.98   0
   5   5  -4   -1.38    2.57   0
   5  -5  -4   -3.14    2.60   0
  -5  -5   4    0.07    2.08   0
  -5   5   3   14.18    5.45   0
   5   5  -3    7.71    3.96   0
  -5  -5   3   11.09    4.36   0
   5  -5  -3   12.38    4.97   0
   5   5  -2   30.56    6.53   0
  -5   5   2   24.73    6.08   0
  -5  -5   2   27.70    6.04   0
   5  -5  -2   22.64    6.04   0
   5   5  -1  134.97   11.42   0
  -5   5   1  132.67   11.36   0
   5  -5  -1  127.48   10.31   0
  -5  -5   1  138.53   11.32   0
   5   5   0   47.52    8.24   0
  -5   5   0   61.78    8.87   0
  -5   5   0   46.25    7.43   0
   5  -5   0   45.72    6.74   0
  -5  -5   0   43.61    7.80   0
  -5   5  -1  147.80   11.32   0
   5   5   1  149.33   12.44   0
  -5   5  -1  147.21   10.64   0
   5  -5   1  138.35    9.23   0
  -5  -5  -1  150.95   12.60   0
   5   5   2  227.36   15.82   0
  -5   5  -2  217.66   13.21   0
  -5   5  -2  221.93   13.92   0
   5  -5   2  213.74   10.74   0
  -5  -5  -2  243.28   16.30   0
   5  -5   2  232.46   11.09   0
   5   5   3   98.74   12.69   0
  -5   5  -3   84.18    9.07   0
  -5   5  -3   78.26    8.75   0
  -5  -5  -3   79.63   11.10   0
   5   5   4    2.77    3.52   0
  -5   5  -4    2.94    2.48   0
  -5   5  -4    5.26    2.95   0
  -5  -5  -4    0.32    3.13   0
   5   5   5  218.66   16.02   0
  -5   5  -5  220.62   12.09   0
  -5   5  -5  220.73   11.88   0
  -5  -5  -5  201.30   16.35   0
   5   5   6   48.78    8.92   0
  -5   5  -6   81.22    6.52   0
  -5   5  -6   70.78    5.98   0
  -5  -5  -6   64.83   10.85   0
   5   5   7   79.57   11.81   0
  -5   5  -7   83.68    6.27   0
  -5   5  -7   89.83    6.68   0
  -5  -5  -7   86.41   13.47   0
  -5   5  -8   84.55    6.07   0
  -5   5  -8   78.01    5.75   0
   5   5   8  107.00   13.12   0
  -5  -5  -8   95.45   13.96   0
  -5   5  -9   65.39    4.72   0
   5   5   9   91.68   12.49   0
  -5   5  -9   71.78    5.07   0
  -5  -5  -9   65.73   11.90   0
   5   5  10    3.40    3.46   0
  -5   5 -10    0.79    1.48   0
  -5  -5 -10    5.43    5.84   0
  -5  -5 -11   -0.42    4.65   0
  -5  -5 -12    6.32    6.12   0
  -5  -5 -13    9.59    6.98   0
  -5  -5 -14   -1.74    5.51   0
   5   6 -15   10.40    5.79   0
   5  -6 -15    5.61    7.60   0
   5   6 -14    7.31    4.81   0
   5  -6 -14    8.17    7.17   0
  -5   6  13    7.48    6.13   0
   5   6 -13    5.07    4.70   0
   5  -6 -13   28.46    9.65   0
   5   6 -12    6.77    5.03   0
  -5   6  12    4.17    5.76   0
   5  -6 -12    6.52    6.18   0
   5   6 -11   25.08    6.49   0
  -5   6  11   26.92    9.40   0
   5  -6 -11   35.37   10.20   0
   5   6 -10   10.02    4.93   0
  -5   6  10    4.97    5.33   0
   5  -6 -10    0.92    4.78   0
   5   6  -9   31.39    7.14   0
  -5   6   9   25.49    8.43   0
   5  -6  -9   32.84    9.28   0
   5   6  -8  199.13   14.88   0
  -5   6   8  215.01   17.98   0
   5  -6  -8  202.14   18.19   0
   5   6  -7    4.66    4.24   0
  -5   6   7    1.55    4.60   0
   5  -6  -7   -1.95    2.69   0
  -5  -6   7   -0.87    1.18   0
  -5   6   6   -0.40    3.43   0
   5   6  -6    1.87    3.95   0
   5  -6  -6    3.68    3.83   0
  -5  -6   6    5.20    2.55   0
  -5   6   5   10.22    5.43   0
   5   6  -5   16.27    5.69   0
  -5  -6   5   18.30    4.56   0
   5  -6  -5   15.47    6.21   0
  -5   6   4   10.93    5.41   0
   5   6  -4    5.00    3.89   0
   5  -6  -4   16.28    6.13   0
  -5  -6   4    7.42    3.63   0
   5   6  -3    3.69    3.55   0
  -5   6   3   17.52    5.94   0
  -5  -6   3   10.86    4.36   0
   5  -6  -3   31.58    7.45   0
   5   6  -2    3.35    3.60   0
  -5   6   2    2.27    3.70   0
   5  -6  -2   -1.09    3.00   0
  -5  -6   2    2.59    3.14   0
   5   6  -1   16.84    5.80   0
   5   6  -1   10.07    4.80   0
  -5   6   1   18.00    5.84   0
  -5  -6   1   23.32    6.17   0
   5  -6  -1    7.01    3.93   0
   5   6   0  138.75   12.89   0
  -5   6   0  157.38   13.20   0
   5   6   0  151.73   13.34   0
   5  -6   0  170.49   11.66   0
  -5  -6   0  179.75   13.77   0
   5   6   1   28.60    6.97   0
   5   6   1   23.81    6.69   0
  -5   6  -1   24.69    6.38   0
   5  -6   1   27.60    5.25   0
  -5  -6  -1   41.25    8.62   0
  -5   6  -2   -0.57    2.09   0
  -5   6  -2   -0.74    3.10   0
   5   6   2    3.86    4.21   0
   5   6   2   -1.38    3.13   0
   5  -6   2    2.93    1.97   0
  -5  -6  -2    1.10    3.28   0
   5   6   3   10.14    5.03   0
   5   6   3   33.17    7.82   0
  -5   6  -3   26.20    5.63   0
  -5   6  -3   21.96    5.49   0
  -5  -6  -3   12.46    5.77   0
   5   6   4  211.85   16.44   0
  -5   6  -4  202.77   13.20   0
  -5   6  -4  197.02   12.75   0
   5   6   4  177.24   15.39   0
  -5  -6  -4  231.81   17.64   0
   5   6   5   11.97    6.03   0
  -5   6  -5    7.84    3.59   0
  -5   6  -5   15.46    4.28   0
  -5  -6  -5   15.86    6.71   0
  -5   6  -6    0.71    2.64   0
  -5   6  -6    5.99    3.11   0
   5   6   6    6.29    4.99   0
  -5  -6  -6   -2.43    4.18   0
   5   6   7   24.15    7.87   0
  -5   6  -7   19.04    4.66   0
  -5   6  -7   27.24    5.05   0
  -5  -6  -7   27.21    8.35   0
   5   6   8   30.39    8.50   0
  -5   6  -8   19.24    4.23   0
  -5  -6  -8   14.94    7.55   0
   5   6   9   11.31    5.74   0
  -5   6  -9   12.95    3.49   0
  -5  -6  -9   23.06    8.46   0
   5   6  10    1.50    4.00   0
  -5   6 -10   12.48    3.27   0
  -5  -6 -10   10.25    5.73   0
  -5  -6 -11   14.94    7.84   0
  -5  -6 -12   -4.39    4.65   0
  -5  -6 -13    8.47    7.19   0
   5   7 -14    5.70    5.06   0
   5  -7 -14   -0.10    6.56   0
  -5   7  13    4.32    7.21   0
   5   7 -13    2.38    4.56   0
   5  -7 -13    2.60    5.89   0
   5   7 -12   30.79    7.50   0
  -5   7  12   52.60   12.42   0
   5  -7 -12   27.20    9.96   0
   5   7 -11   37.23    8.21   0
  -5   7  11   30.63   10.34   0
   5  -7 -11   19.79    9.32   0
  -5   7  10   31.89   10.04   0
   5   7 -10   51.53    9.73   0
   5  -7 -10   29.39   10.33   0
   5   7  -9   -3.67    3.04   0
  -5   7   9   -3.25    4.39   0
   5  -7  -9   -1.18    4.70   0
  -5   7   8   78.37   13.86   0
   5   7  -8   68.96   11.01   0
   5  -7  -8   74.43   13.95   0
   5   7  -7    5.94    4.44   0
  -5   7   7   10.72    6.66   0
   5  -7  -7    8.06    5.85   0
  -5   7   6    6.33    5.90   0
   5   7  -6   12.87    5.78   0
   5  -7  -6   25.65    8.13   0
  -5  -7   6   23.08    4.86   0
  -5   7   5   32.16    9.32   0
   5   7  -5   46.07    9.25   0
  -5  -7   5   32.54    6.05   0
   5  -7  -5   36.72    8.87   0
  -5   7   4   -1.09    3.71   0
   5   7  -4    2.11    4.06   0
   5  -7  -4    6.91    4.71   0
  -5  -7   4   -0.94    2.68   0
  -5   7   3    7.91    5.25   0
   5   7  -3    2.54    3.98   0
  -5  -7   3   15.52    5.43   0
   5  -7  -3   -1.47    3.65   0
  -5   7   2   30.55    7.78   0
   5   7  -2   56.82   10.58   0
   5   7  -2   41.53    9.10   0
   5  -7  -2   40.74    8.51   0
  -5  -7   2   53.17    9.09   0
  -5   7   1   24.31    7.13   0
   5   7  -1   16.21    6.29   0
   5   7  -1   21.34    6.80   0
  -5  -7   1   27.22    7.05   0
   5  -7  -1   29.58    6.89   0
   5   7   0   20.12    6.49   0
  -5   7   0   10.30    5.91   0
   5   7   0   13.19    5.78   0
  -5  -7   0   11.29    5.48   0
   5  -7   0   12.59    4.25   0
   5   7   1   -3.55    2.46   0
  -5   7  -1    6.14    4.25   0
   5   7   1   -1.70    2.98   0
   5  -7   1   -1.68    2.38   0
  -5  -7  -1    0.95    3.94   0
   5   7   2   49.08    9.77   0
  -5   7  -2   45.39    8.71   0
   5   7   2   55.08   10.64   0
  -5  -7  -2   42.91    9.54   0
   5  -7   2   56.17    6.42   0
  -5   7  -3   16.85    5.57   0
   5   7   3   17.14    6.56   0
   5   7   3   16.02    6.01   0
  -5  -7  -3   20.59    7.12   0
   5  -7   3   27.73    3.59   0
   5   7   4    9.10    6.27   0
  -5   7  -4    8.12    4.25   0
   5   7   4   10.09    5.89   0
  -5   7  -4   -0.20    2.96   0
  -5  -7  -4    8.87    6.24   0
  -5   7  -5  237.75   15.36   0
   5   7   5  228.88   18.72   0
   5   7   5  214.86   18.34   0
  -5  -7  -5  246.92   19.68   0
   5   7   6   -1.31    4.06   0
  -5   7  -6    2.41    3.23   0
  -5  -7  -6    7.98    6.13   0
  -5   7  -7    0.29    2.86   0
   5   7   7   -2.72    4.00   0
  -5  -7  -7   -2.03    4.00   0
  -5   7  -8   11.13    4.18   0
   5   7   8    8.56    6.51   0
  -5  -7  -8   14.90    7.85   0
   5   7   9    5.44    4.49   0
  -5   7  -9    1.80    3.17   0
  -5  -7  -9    5.78    6.80   0
   5   7  10   -1.98    3.60   0
  -5   7 -10    0.21    2.67   0
  -5  -7 -10    3.09    5.37   0
  -5  -7 -11   -2.47    4.31   0
  -5  -7 -12   11.32    7.98   0
   5   8 -12    7.88    5.13   0
  -5   8  12    1.53    7.29   0
   5  -8 -12   -3.32    5.00   0
   5   8 -11   12.51    6.28   0
  -5   8  11   13.84    7.58   0
   5  -8 -11    0.46    6.81   0
  -5   8  10   78.66   15.24   0
   5   8 -10   64.14   11.37   0
   5  -8 -10   93.99   16.68   0
   5   8  -9   20.95    7.02   0
  -5   8   9   31.15    9.99   0
   5  -8  -9   23.99    9.37   0
   5   8  -8   19.34    7.18   0
  -5   8   8   16.42    8.61   0
   5  -8  -8   29.59    9.81   0
  -5   8   7   17.51    7.38   0
   5   8  -7   40.12    8.98   0
   5  -8  -7   18.97    7.86   0
  -5   8   6   10.26    6.77   0
   5   8  -6    5.73    5.59   0
   5  -8  -6   10.55    6.82   0
   5   8  -5    3.25    4.80   0
  -5   8   5   -4.93    4.62   0
   5  -8  -5    3.33    4.88   0
  -5   8   4    3.77    5.36   0
   5   8  -4    6.02    5.41   0
  -5  -8   4    1.89    3.51   0
   5  -8  -4    4.03    4.81   0
   5   8  -3   23.40    7.25   0
  -5   8   3   31.42    8.74   0
   5   8  -3   30.55    8.62   0
   5  -8  -3   29.80    8.13   0
  -5  -8   3   26.00    6.66   0
  -5   8   2    1.23    4.52   0
   5   8  -2   -1.35    3.85   0
   5   8  -2    0.41    3.96   0
  -5  -8   2    1.95    3.51   0
   5  -8  -2   -0.08    3.39   0
   5   8  -1   48.95   10.22   0
  -5   8   1   31.97    8.67   0
   5   8  -1   59.36   10.59   0
   5  -8  -1   45.23    8.42   0
  -5  -8   1   63.88   10.70   0
   5   8   0   13.77    6.19   0
  -5   8   0   15.18    6.27   0
   5   8   0   13.14    6.48   0
  -5  -8   0   22.39    7.06   0
   5  -8   0   17.32    5.69   0
  -5   8  -1   -1.16    3.32   0
   5   8   1   -4.53    3.51   0
   5   8   1   -0.55    4.05   0
  -5  -8  -1    6.22    4.94   0
   5  -8   1    4.37    3.17   0
  -5   8  -2   19.32    6.39   0
   5   8   2    4.31    5.35   0
   5   8   2   19.99    7.52   0
  -5  -8  -2   13.18    6.91   0
   5   8   3  123.61   17.14   0
   5   8   3   87.34   15.15   0
  -5   8  -3   80.79   11.76   0
  -5  -8  -3  108.88   16.19   0
   5   8   4   -2.74    4.09   0
   5   8   4   13.30    6.37   0
  -5   8  -4    8.48    4.64   0
  -5  -8  -4    2.79    4.57   0
  -5   8  -5   40.89    8.16   0
   5   8   5   23.32    8.73   0
   5   8   5   46.19   11.52   0
  -5  -8  -5   19.57    8.78   0
  -5   8  -6   25.27    6.20   0
   5   8   6   13.32    7.18   0
  -5  -8  -6   19.53    8.20   0
   5   8   7   -2.99    4.67   0
  -5   8  -7   -4.15    2.53   0
  -5  -8  -7    7.24    6.48   0
   5   8   8   13.31    7.11   0
  -5   8  -8    0.55    3.50   0
  -5  -8  -8   -2.76    5.63   0
  -5   8  -9    5.85    3.85   0
   5   8   9    3.27    5.81   0
  -5  -8  -9   -4.39    4.39   0
  -5   8 -10    0.02    3.19   0
   5   8  10   -1.16    4.73   0
  -5  -8 -10    0.98    6.15   0
  -5  -8 -11    6.64    8.39   0
  -5   9  11   -3.32    6.45   0
   5   9 -11   -3.20    3.68   0
   5  -9 -11   -3.34    6.38   0
   5   9 -10   31.48    8.80   0
  -5   9  10   34.99   11.23   0
   5  -9 -10   36.44   12.95   0
   5   9  -9    7.91    6.44   0
  -5   9   9    1.71    7.33   0
   5  -9  -9    3.59    6.67   0
  -5   9   8   56.69   14.13   0
   5   9  -8   68.88   12.84   0
   5  -9  -8   59.36   13.83   0
  -5   9   7    1.75    6.05   0
   5   9  -7   11.69    5.82   0
   5  -9  -7   -0.69    4.66   0
   5   9  -6   -3.88    4.67   0
  -5   9   6   -3.93    4.40   0
   5  -9  -6    2.06    5.65   0
  -5   9   5   18.91    8.66   0
   5   9  -5   27.74    9.50   0
   5  -9  -5   14.38    7.09   0
  -5   9   4   -1.22    5.49   0
   5   9  -4    2.72    5.69   0
   5  -9  -4    4.54    5.45   0
   5   9  -3    1.74    4.69   0
  -5   9   3    0.02    4.47   0
   5  -9  -3    3.30    4.50   0
  -5  -9   3    4.01    4.07   0
  -5   9   2    8.13    5.99   0
   5   9  -2   11.88    5.89   0
   5   9  -2   10.52    5.23   0
   5  -9  -2    3.11    4.65   0
  -5  -9   2    6.71    4.75   0
   5   9  -1   83.37   15.19   0
   5   9  -1   77.68   13.87   0
  -5   9   1   68.70   12.86   0
   5  -9  -1   77.46   11.88   0
  -5  -9   1   84.41   13.09   0
   5   9   0    4.31    5.92   0
  -5   9   0    3.70    5.35   0
   5   9   0    9.09    5.96   0
  -5  -9   0   12.89    6.48   0
   5   9   1    4.76    5.11   0
   5   9   1   -1.66    4.68   0
  -5   9  -1   -3.10    4.18   0
  -5  -9  -1    0.15    3.90   0
  -5   9  -2   -0.47    4.23   0
   5   9   2   -3.92    4.57   0
   5   9   2   -1.83    4.56   0
  -5  -9  -2    2.35    4.82   0
   5   9   3   15.36    7.84   0
  -5   9  -3    5.85    4.91   0
   5   9   3   12.30    6.79   0
  -5  -9  -3    6.81    5.73   0
   5   9   4   -0.76    5.41   0
  -5   9  -4    0.00    3.74   0
   5   9   4   -3.00    4.62   0
  -5  -9  -4    4.03    5.22   0
   5   9   5   19.78    8.72   0
  -5   9  -5   22.32    7.01   0
   5   9   5   16.38    7.46   0
  -5  -9  -5   19.21    8.63   0
  -5   9  -6   16.66    6.36   0
   5   9   6   -3.51    3.83   0
  -5  -9  -6   16.16    8.15   0
   5   9   7    1.10    5.54   0
  -5   9  -7    0.96    3.93   0
  -5  -9  -7   -2.97    4.30   0
  -5   9  -8    1.57    4.30   0
   5   9   8    7.81    7.18   0
  -5  -9  -8   -3.55    4.74   0
   5   9   9    4.81    6.92   0
  -5   9  -9   -0.07    4.05   0
  -5  -9  -9   -0.72    5.60   0
  -5  10   8    7.15    8.33   0
   5  10  -8    7.45    6.78   0
   5 -10  -8    8.91    7.47   0
   5  10  -7   17.01    8.90   0
  -5  10   7    9.22    7.86   0
   5 -10  -7   27.76   10.63   0
   5  10  -6   -3.14    5.09   0
  -5  10   6   -4.95    4.83   0
   5 -10  -6    9.32    6.70   0
   5  10  -5    2.68    6.60   0
  -5  10   5    0.82    5.95   0
   5 -10  -5    0.28    5.48   0
   5  10  -4   10.13    7.58   0
  -5  10   4   10.76    7.74   0
   5 -10  -4   16.98    7.92   0
  -5  10   3   -2.05    4.84   0
   5  10  -3   -0.15    6.09   0
   5 -10  -3    1.78    4.21   0
   5  10  -2    1.26    4.97   0
   5  10  -2    5.88    6.90   0
  -5  10   2    0.00    5.52   0
   5  10  -1   13.58    7.34   0
   5  10  -1   19.26    7.98   0
  -5  10   1   13.44    7.83   0
  -5 -10   1   18.03    6.92   0
   5  10   0    0.64    5.10   0
   5  10   0    4.82    6.86   0
  -5  10   0    4.65    6.20   0
  -5 -10   0    5.37    5.81   0
   5  10   1   54.88   12.18   0
  -5  10  -1   58.00   12.00   0
   5  10   1   58.81   13.61   0
  -5 -10  -1   54.99   11.97   0
   5  10   2   27.72   10.04   0
   5  10   2   35.53   10.31   0
  -5  10  -2   49.16   11.32   0
  -5 -10  -2   42.26   10.90   0
  -5  10  -3   73.33   12.94   0
   5  10   3   84.52   16.57   0
   5  10   3   87.40   17.24   0
  -5 -10  -3   93.43   15.99   0
  -5  10  -4    0.24    4.72   0
   5  10   4    6.67    6.82   0
   5  10   4    4.00    7.31   0
  -5 -10  -4    0.76    6.44   0
  -5  10  -5    6.10    5.39   0
   5  10   5   -3.48    5.29   0
  -5 -10  -5    3.12    6.59   0
   5  10   6    2.66    6.22   0
  -5  10  -6    0.54    4.95   0
  -5 -10  -6   -1.83    6.44   0
  -5  10  -7    8.09    5.46   0
   5  10   7   15.03    8.55   0
  -5 -10  -7    9.91    7.81   0
   5  11  -5   -7.57    5.35   0
  -5  11   5   11.37    7.68   0
   5 -11  -5   -2.37    5.45   0
  -5  11   4    2.26    6.10   0
   5  11  -4   -8.58    5.42   0
  -5  11   3    1.59    6.64   0
   5  11  -3    2.62    7.45   0
   5  11  -2   25.42   11.07   0
  -5  11   2   20.37    9.17   0
  -5  11   1    0.79    6.57   0
   5  11  -1    1.36    7.00   0
   5  11   0    0.47    7.10   0
   5  11   0   -6.92    4.32   0
  -5  11   0    1.01    6.44   0
   5  11   1   30.17   10.52   0
  -5  11  -1   18.50    9.05   0
   5  11   1   40.12   12.76   0
  -5 -11  -1   49.16   11.45   0
  -5  11  -2   11.29    7.66   0
   5  11   2   21.42   10.23   0
   5  11   2    7.86    8.39   0
  -5 -11  -2    4.07    6.24   0
  -5  11  -3    4.71    5.95   0
   5  11   3   -1.02    7.38   0
   5  11   3    6.98    6.72   0
  -5 -11  -3    5.00    7.31   0
   6   0 -17   -0.46    4.73   0
   6   0 -16   27.14    8.52   0
   6   0 -15   -1.14    4.09   0
   6   0 -14   -1.26    4.19   0
   6   0 -13   -3.31    3.34   0
   6   0 -12   27.87    7.58   0
  -6   0  12   26.07    4.68   0
  -6   0  11   -0.47    2.03   0
   6   0 -11    3.94    3.52   0
   6   0 -10  112.77   12.52   0
  -6   0  10   95.73    8.38   0
  -6   0   9    2.19    2.44   0
   6   0  -9   -3.20    2.36   0
   6   0  -8   -0.97    2.67   0
  -6   0   8   -0.08    2.19   0
   6   0  -8    1.10    3.21   0
  -6   0   7   -0.76    2.52   0
   6   0  -7    2.06    2.93   0
   6   0  -7   -0.70    1.74   0
   6   0  -6  222.66   13.77   0
  -6   0   6  215.25   13.21   0
   6   0  -6  231.84   13.90   0
   6   0  -5    1.31    2.57   0
  -6   0   5    3.61    3.10   0
   6   0  -5    1.60    2.62   0
   6   0  -4   36.05    5.86   0
  -6   0   4   36.99    6.10   0
  -6   0   4   30.55    5.36   0
   6   0  -4   41.46    6.73   0
  -6   0   3    1.17    2.83   0
  -6   0   3   -2.14    1.82   0
   6   0  -3    0.99    2.27   0
   6   0  -3    0.16    2.58   0
  -6   0   2  212.18   12.43   0
   6   0  -2  202.62   11.95   0
  -6   0   2  210.97   12.04   0
   6   0  -2  240.19   12.60   0
  -6   0   1   -0.69    2.51   0
  -6   0   1    2.46    2.96   0
   6   0  -1    2.25    2.59   0
   6   0  -1   -2.19    1.76   0
  -6   0   0 1020.61   39.14   0
  -6   0   0 1051.85   38.96   0
   6   0   0 1030.03   38.61   0
   6   0   0 1044.34   38.73   0
   6   0   1    5.92    2.70   0
  -6   0  -1   10.39    3.35   0
  -6   0  -1    9.54    3.24   0
   6   0   1    7.97    2.99   0
   6   0   2  143.10    8.71   0
  -6   0  -2  149.61    9.58   0
   6   0   2  148.45    8.67   0
  -6   0  -2  159.68    9.47   0
  -6   0  -3   -1.46    1.76   0
  -6   0  -3    3.24    2.47   0
   6   0   3   -0.75    1.63   0
   6   0   3   -0.93    1.55   0
  -6   0  -4   45.35    6.04   0
   6   0   4   44.03    4.04   0
  -6   0  -4   54.10    6.42   0
   6   0   4   50.27    4.27   0
   6   0   5    0.19    1.20   0
  -6   0  -5    3.44    2.52   0
  -6   0  -5   -0.11    2.03   0
   6   0   5   -0.46    0.43   0
  -6   0  -6   12.11    3.52   0
  -6   0  -6   12.58    3.55   0
  -6   0  -7    2.97    2.51   0
  -6   0  -7    0.79    2.24   0
  -6   0  -8  121.45    9.05   0
  -6   0  -8  103.65    8.79   0
  -6   0  -8  103.54    8.45   0
  -6   0  -9    0.19    2.88   0
  -6   0  -9    3.25    3.41   0
  -6   0 -10    4.34    3.60   0
  -6   0 -10   -1.05    2.62   0
  -6   0 -11    0.67    3.02   0
  -6   0 -12   27.02    6.24   0
  -6   0 -13   -2.11    2.95   0
  -6   0 -14   11.05    5.04   0
  -6   0 -15   -3.11    3.80   0
   6   1 -17    0.44    4.25   0
   6  -1 -17    3.88    6.10   0
   6   1 -16   -0.61    3.71   0
   6  -1 -16   -0.68    4.56   0
   6   1 -15   20.37    7.12   0
   6  -1 -15    5.45    5.24   0
   6   1 -14   26.22    7.45   0
   6  -1 -14   10.92    6.25   0
   6   1 -13    2.76    3.67   0
   6  -1 -13    3.45    4.52   0
  -6   1  12    6.76    3.46   0
   6   1 -12   15.11    5.17   0
   6  -1 -12   12.92    5.63   0
   6   1 -11   75.54   10.52   0
  -6   1  11   80.76    9.60   0
  -6  -1  11   73.55    5.87   0
   6  -1 -11   62.47   10.26   0
  -6   1  10   15.14    4.65   0
   6   1 -10   15.57    5.10   0
   6  -1 -10   18.70    5.92   0
  -6  -1  10   26.21    4.63   0
   6   1  -9   17.95    5.08   0
  -6   1   9   20.44    5.42   0
   6   1  -9   23.04    5.54   0
  -6  -1   9   29.99    5.20   0
   6  -1  -9   20.56    5.85   0
   6   1  -8    6.90    3.84   0
  -6   1   8    8.60    3.92   0
   6   1  -8    1.43    2.72   0
   6  -1  -8    6.04    4.25   0
  -6  -1   8    5.17    2.74   0
  -6   1   7  144.45   11.04   0
   6   1  -7  147.67   10.93   0
   6   1  -7  152.82   11.07   0
  -6  -1   7  153.77   10.07   0
   6  -1  -7  138.97   11.15   0
   6   1  -6    1.48    2.90   0
   6   1  -6    3.03    2.73   0
  -6   1   6    1.55    2.63   0
  -6  -1   6    4.65    2.81   0
   6  -1  -6    4.27    3.16   0
  -6   1   5    6.11    3.38   0
   6   1  -5    7.63    3.61   0
   6   1  -5    7.74    3.43   0
  -6  -1   5    9.24    3.42   0
   6  -1  -5    9.61    3.85   0
   6  -1  -5    2.86    2.93   0
   6   1  -4  109.49    8.85   0
  -6   1   4  110.29    9.43   0
   6   1  -4  117.67    8.98   0
  -6   1   4  122.31    9.46   0
   6  -1  -4   91.39    8.53   0
   6  -1  -4   97.98    8.54   0
  -6  -1   4  124.26    8.80   0
  -6  -1   4  107.06    8.61   0
   6   1  -3  310.72   15.96   0
  -6   1   3  331.55   16.35   0
  -6   1   3  306.32   16.37   0
   6   1  -3  322.24   16.43   0
  -6  -1   3  376.73   16.75   0
   6  -1  -3  311.67   16.27   0
  -6  -1   3  318.76   16.16   0
   6  -1  -3  296.63   16.03   0
  -6   1   2  731.37   30.05   0
  -6   1   2  747.42   30.52   0
   6   1  -2  742.29   30.39   0
   6   1  -2  742.42   30.26   0
  -6  -1   2  782.94   30.41   0
   6  -1  -2  771.61   30.30   0
  -6  -1   2  712.56   30.13   0
   6  -1  -2  765.96   30.25   0
   6   1  -1  178.16   11.07   0
   6   1  -1  194.67   11.33   0
  -6   1   1  182.00   10.90   0
  -6   1   1  194.96   11.37   0
   6  -1  -1  185.22   10.90   0
   6  -1  -1  190.82   10.82   0
  -6  -1   1  166.27   11.01   0
  -6  -1   1  179.58   10.98   0
   6   1   0   11.26    3.61   0
  -6   1   0   19.35    4.60   0
   6   1   0   12.46    3.67   0
  -6   1   0   15.71    3.77   0
  -6  -1   0   17.52    4.23   0
   6  -1   0   15.72    3.67   0
   6  -1   0   16.07    3.63   0
  -6  -1   0    9.12    3.83   0
  -6   1  -1    4.59    2.65   0
  -6   1  -1    2.33    2.41   0
   6   1   1    0.16    2.18   0
   6   1   1   -0.77    2.25   0
  -6  -1  -1   -3.14    1.71   0
   6  -1   1    0.90    1.93   0
  -6  -1  -1    2.93    3.00   0
   6  -1   1   -1.17    1.86   0
   6   1   2   38.27    5.57   0
  -6   1  -2   23.45    4.16   0
   6   1   2   37.70    5.65   0
  -6   1  -2   30.53    4.83   0
   6  -1   2   25.12    3.83   0
  -6  -1  -2   37.48    6.25   0
   6  -1   2   32.32    4.29   0
  -6  -1  -2   33.44    5.99   0
  -6   1  -3  616.24   24.30   0
  -6   1  -3  612.77   24.59   0
   6   1   3  585.81   24.88   0
   6   1   3  589.08   24.75   0
  -6  -1  -3  619.33   26.26   0
   6  -1   3  604.05   22.26   0
  -6  -1  -3  644.93   26.18   0
   6  -1   3  624.41   22.46   0
   6   1   4   10.90    3.32   0
  -6   1  -4   17.40    3.61   0
   6   1   4    7.93    2.88   0
  -6   1  -4   12.85    3.23   0
  -6  -1  -4    7.38    3.35   0
  -6  -1  -4    6.74    3.21   0
   6   1   5    5.84    2.64   0
   6   1   5    6.33    2.66   0
  -6   1  -5    6.90    2.60   0
  -6   1  -5    5.15    2.50   0
  -6  -1  -5    6.74    3.32   0
  -6  -1  -5    6.26    3.27   0
   6   1   6    7.61    2.57   0
  -6   1  -6    6.42    2.68   0
   6   1   6   11.51    3.02   0
  -6   1  -6    6.70    2.63   0
  -6  -1  -6    2.83    2.83   0
  -6  -1  -6    4.54    2.88   0
  -6  -1  -6    5.57    3.08   0
   6   1   7  103.04    6.39   0
  -6   1  -7  104.46    7.66   0
   6   1   7  106.02    6.41   0
  -6   1  -7  109.56    7.55   0
  -6  -1  -7  111.07    9.39   0
  -6  -1  -7  124.63    9.71   0
  -6  -1  -7  103.90    9.00   0
  -6   1  -8    2.86    2.00   0
  -6   1  -8    4.76    2.77   0
   6   1   8    3.16    1.16   0
  -6  -1  -8    1.50    2.90   0
  -6  -1  -8    2.31    3.12   0
  -6   1  -9    6.07    2.80   0
  -6   1  -9    4.68    3.12   0
  -6  -1  -9    4.84    3.70   0
  -6  -1  -9    9.11    4.46   0
  -6   1 -10    1.51    2.63   0
  -6   1 -10    2.83    2.66   0
  -6  -1 -10   -1.78    2.90   0
  -6  -1 -10    3.48    3.68   0
  -6   1 -11    2.38    3.02   0
  -6  -1 -11   -0.92    3.36   0
  -6   1 -12    5.73    3.72   0
  -6  -1 -12    9.45    4.86   0
  -6   1 -13   11.83    4.60   0
  -6  -1 -13    4.88    4.31   0
  -6   1 -14    0.81    3.50   0
  -6  -1 -14   -5.08    3.55   0
  -6   1 -15   -1.90    3.52   0
  -6  -1 -15    6.05    5.12   0
   6   2 -17    2.32    4.79   0
   6  -2 -17    4.04    6.62   0
   6   2 -16   -0.79    4.34   0
   6  -2 -16    0.11    4.47   0
   6   2 -15    1.77    4.15   0
   6  -2 -15    3.16    5.05   0
   6   2 -14    5.81    4.42   0
   6  -2 -14    1.25    4.49   0
   6   2 -13   -1.61    3.49   0
   6  -2 -13    2.27    4.61   0
  -6   2  12    0.73    3.45   0
   6   2 -12    0.29    3.09   0
   6  -2 -12   -1.27    3.35   0
  -6   2  11   11.52    4.86   0
   6   2 -11   23.14    6.58   0
   6   2 -11   27.12    6.53   0
   6  -2 -11   22.86    7.09   0
   6   2 -10   66.79    9.57   0
  -6   2  10   56.14    9.09   0
   6   2 -10   49.26    8.08   0
   6  -2 -10   48.20    9.38   0
   6   2  -9   -0.62    2.82   0
   6   2  -9    9.79    3.83   0
  -6   2   9    4.56    4.01   0
   6  -2  -9   19.52    6.02   0
  -6  -2   9   12.90    3.17   0
  -6   2   8    5.78    3.66   0
   6   2  -8    6.66    3.59   0
   6   2  -8    7.84    4.00   0
  -6  -2   8    4.84    2.51   0
   6  -2  -8    1.77    3.32   0
   6   2  -7   22.66    5.43   0
  -6   2   7   21.53    5.57   0
   6   2  -7   24.19    5.60   0
  -6  -2   7   23.90    4.74   0
   6  -2  -7   19.81    5.67   0
  -6   2   6   17.92    5.27   0
   6   2  -6    9.01    3.64   0
   6   2  -6   15.04    5.06   0
   6  -2  -6    7.94    4.34   0
  -6  -2   6   20.39    4.38   0
   6   2  -5    6.03    3.09   0
  -6   2   5    4.01    3.11   0
   6   2  -5    3.03    3.34   0
   6  -2  -5    0.50    2.80   0
  -6  -2   5   -0.39    2.37   0
   6   2  -4   87.89    9.61   0
  -6   2   4   80.13    9.52   0
   6   2  -4   65.33    7.89   0
  -6  -2   4   68.22    8.03   0
   6  -2  -4   87.13   10.05   0
   6   2  -3   48.55    6.82   0
  -6   2   3   56.24    7.60   0
  -6   2   3   63.07    8.30   0
   6   2  -3   71.26    8.49   0
  -6  -2   3   63.69    7.86   0
   6  -2  -3   52.85    7.47   0
  -6   2   2  124.06    9.12   0
  -6   2   2  125.78    9.67   0
   6   2  -2  116.70    9.06   0
   6   2  -2  146.48    9.91   0
  -6  -2   2  127.74    9.26   0
  -6  -2   2  108.07    9.27   0
   6  -2  -2  125.85    9.17   0
   6  -2  -2  125.70    9.22   0
  -6   2   1   27.05    5.44   0
   6   2  -1   43.06    6.57   0
   6   2  -1   61.19    7.92   0
  -6   2   1   32.95    5.47   0
  -6  -2   1   58.72    7.72   0
   6  -2  -1   28.81    5.36   0
   6  -2  -1   36.96    5.77   0
  -6  -2   1   62.27    7.48   0
   6   2   0  174.33   11.63   0
  -6   2   0  203.35   11.78   0
   6   2   0  180.93   11.92   0
  -6   2   0  201.64   11.47   0
  -6  -2   0  212.69   12.32   0
  -6  -2   0  192.82   12.50   0
   6  -2   0  193.37   10.76   0
   6  -2   0  223.95   11.47   0
   6   2   1    9.51    3.63   0
  -6   2  -1   15.40    3.95   0
  -6   2  -1   22.00    4.45   0
   6  -2   1   15.31    3.30   0
  -6  -2  -1   13.24    4.72   0
  -6  -2  -1    5.19    3.07   0
   6  -2   1   17.74    3.53   0
   6   2   2  142.81   10.61   0
  -6   2  -2  179.86   10.23   0
  -6   2  -2  165.93    9.77   0
  -6  -2  -2  158.31   11.40   0
   6  -2   2  195.93    8.84   0
  -6  -2  -2  144.90   10.68   0
   6  -2   2  191.44    8.74   0
  -6   2  -3   25.23    4.45   0
  -6   2  -3   29.81    4.34   0
   6   2   3   13.67    4.01   0
  -6  -2  -3   18.45    4.69   0
  -6  -2  -3   19.17    4.91   0
  -6   2  -4    6.29    2.24   0
   6   2   4    1.23    2.30   0
  -6   2  -4    3.55    2.18   0
  -6  -2  -4    0.54    2.11   0
  -6  -2  -4    2.79    3.32   0
  -6  -2  -4    0.07    1.93   0
  -6   2  -5    4.22    2.28   0
  -6   2  -5   10.40    2.58   0
   6   2   5   12.11    3.86   0
  -6  -2  -5   17.80    4.82   0
  -6  -2  -5   18.00    4.84   0
  -6  -2  -5   14.15    4.51   0
  -6   2  -6   43.08    4.74   0
   6   2   6   40.66    6.15   0
  -6   2  -6   41.57    4.81   0
  -6  -2  -6   45.47    7.75   0
  -6  -2  -6   39.76    7.19   0
  -6   2  -7   21.00    3.54   0
  -6   2  -7   18.57    3.48   0
   6   2   7   21.65    4.48   0
  -6  -2  -7   21.34    5.71   0
   6   2   8   20.46    4.43   0
  -6   2  -8   19.41    3.49   0
  -6   2  -8   14.09    3.15   0
  -6  -2  -8   29.50    7.06   0
  -6   2  -9    0.33    1.99   0
  -6   2  -9   -2.87    1.42   0
   6   2   9   -0.99    1.73   0
  -6  -2  -9    0.53    3.10   0
  -6   2 -10    1.14    2.16   0
  -6   2 -10    1.17    2.17   0
  -6  -2 -10    0.96    3.72   0
  -6   2 -11    0.22    2.28   0
  -6  -2 -11    4.42    4.46   0
  -6   2 -12   27.11    5.10   0
  -6  -2 -12   30.32    7.96   0
  -6   2 -13   23.86    5.04   0
  -6  -2 -13    3.64    5.38   0
  -6   2 -14   13.06    4.32   0
  -6  -2 -14    4.62    4.40   0
  -6  -2 -15    7.03    6.23   0
   6   3 -16   -3.50    3.36   0
   6  -3 -16   -0.16    4.74   0
   6   3 -15   19.01    6.35   0
   6  -3 -15    6.41    6.62   0
   6   3 -14   -1.29    3.79   0
   6  -3 -14   -2.04    4.35   0
  -6   3  13   43.63    8.52   0
   6   3 -13   46.36    8.56   0
   6  -3 -13   29.64    8.96   0
   6   3 -12    7.97    4.43   0
  -6   3  12   24.34    6.75   0
   6  -3 -12    7.24    5.17   0
  -6   3  11   84.51   11.64   0
   6   3 -11  114.30   12.85   0
   6   3 -11   84.79   11.02   0
   6  -3 -11   75.28   12.40   0
  -6   3  10    9.78    5.25   0
   6   3 -10   11.75    4.55   0
   6   3 -10   12.60    4.58   0
   6  -3 -10    7.55    4.64   0
   6   3  -9    9.03    4.28   0
   6   3  -9    6.15    3.61   0
  -6   3   9    4.25    4.05   0
  -6  -3   9    2.87    1.54   0
   6  -3  -9    7.88    4.66   0
   6   3  -8   21.52    5.65   0
   6   3  -8   20.60    5.28   0
  -6   3   8   30.25    7.29   0
  -6  -3   8   24.38    4.27   0
   6  -3  -8   19.96    5.89   0
   6   3  -7    9.71    4.04   0
  -6   3   7    7.65    4.54   0
   6   3  -7    5.19    3.51   0
   6  -3  -7    3.42    3.92   0
  -6  -3   7   11.39    3.33   0
  -6   3   6   50.19    8.46   0
   6   3  -6   45.62    7.28   0
   6   3  -6   75.69    9.31   0
   6  -3  -6   63.87    9.32   0
  -6  -3   6   64.60    7.62   0
   6   3  -5    1.26    2.74   0
   6   3  -5    1.39    2.56   0
  -6   3   5    1.74    2.92   0
   6  -3  -5    3.78    3.17   0
  -6  -3   5    4.49    2.87   0
   6   3  -4    5.38    3.32   0
   6   3  -4   10.07    3.95   0
  -6   3   4   -0.62    2.59   0
   6  -3  -4    5.41    3.65   0
  -6  -3   4   -1.51    2.26   0
  -6   3   3  305.82   17.12   0
   6   3  -3  276.61   16.11   0
   6   3  -3  289.81   16.13   0
  -6  -3   3  285.35   15.83   0
   6  -3  -3  303.36   16.70   0
   6   3  -2    4.65    3.43   0
   6   3  -2    1.86    2.70   0
  -6   3   2    4.80    3.26   0
  -6   3   2    4.27    3.27   0
  -6  -3   2    6.43    3.31   0
   6  -3  -2    3.61    3.19   0
   6   3  -1  322.36   17.26   0
  -6   3   1  301.04   16.27   0
   6  -3  -1  312.69   16.10   0
  -6  -3   1  323.07   17.36   0
  -6   3   0  145.53   10.07   0
  -6   3   0  151.28   10.55   0
   6   3   0  163.39   11.68   0
   6  -3   0  156.24    9.77   0
   6  -3   0  156.67    9.72   0
  -6  -3   0  153.44   11.29   0
   6   3   1  465.73   21.98   0
  -6   3  -1  441.15   19.69   0
  -6   3  -1  438.66   20.04   0
   6  -3   1  407.20   18.09   0
   6  -3   1  417.93   18.20   0
  -6  -3  -1  413.48   21.29   0
  -6   3  -2  212.38   11.95   0
  -6   3  -2  237.92   12.25   0
   6   3   2  198.80   13.40   0
   6  -3   2  226.00   10.02   0
  -6  -3  -2  187.33   13.69   0
   6  -3   2  215.22    9.97   0
  -6   3  -3  123.71    8.20   0
   6   3   3  142.54   10.87   0
  -6   3  -3  131.23    8.53   0
  -6  -3  -3  123.31   10.76   0
   6   3   4   43.90    7.13   0
  -6   3  -4   28.09    4.39   0
  -6   3  -4   27.52    4.30   0
  -6  -3  -4   28.38    6.53   0
  -6   3  -5   84.69    6.05   0
  -6   3  -5   82.20    6.03   0
   6   3   5   78.18    9.86   0
  -6  -3  -5   85.77   11.06   0
  -6   3  -6   12.81    2.73   0
  -6   3  -6   14.36    3.05   0
   6   3   6    9.54    3.94   0
  -6  -3  -6    9.20    5.08   0
   6   3   7   96.74   10.68   0
  -6   3  -7   99.66    6.31   0
  -6   3  -7   92.39    5.95   0
  -6  -3  -7  108.43   12.72   0
   6   3   8   -2.25    2.12   0
  -6   3  -8   -0.18    1.42   0
  -6   3  -8    1.46    1.77   0
  -6  -3  -8   -1.45    3.01   0
  -6   3  -9    6.14    2.12   0
   6   3   9    5.58    3.43   0
  -6   3  -9    6.31    2.19   0
  -6  -3  -9    7.68    4.91   0
  -6   3 -10   16.21    3.27   0
  -6   3 -10   19.45    3.43   0
  -6  -3 -10   18.16    6.59   0
  -6   3 -11    6.74    2.63   0
  -6  -3 -11   11.00    5.70   0
  -6   3 -12   -1.21    1.79   0
  -6  -3 -12   -0.40    4.36   0
  -6  -3 -13   -1.73    4.45   0
  -6  -3 -14    4.97    5.54   0
   6   4 -16    9.52    5.62   0
   6  -4 -16    6.29    7.70   0
   6   4 -15   14.68    5.75   0
   6  -4 -15   12.71    7.20   0
   6   4 -14    7.20    4.84   0
   6  -4 -14   -4.16    4.61   0
   6   4 -13   76.61   11.40   0
  -6   4  13   90.67   12.51   0
   6  -4 -13   95.06   15.60   0
   6   4 -12    3.24    3.86   0
  -6   4  12    2.27    4.48   0
   6  -4 -12    7.96    5.42   0
   6   4 -11   18.38    5.64   0
  -6   4  11   49.64    9.85   0
   6  -4 -11   25.76    8.52   0
  -6   4  10   41.45    8.96   0
   6   4 -10   42.41    7.80   0
   6   4 -10   49.86    8.54   0
   6  -4 -10   36.29    8.88   0
   6   4  -9   17.08    5.45   0
   6   4  -9   33.65    6.97   0
  -6   4   9   32.32    7.84   0
   6  -4  -9   18.03    7.18   0
  -6  -4   9   18.82    2.56   0
  -6  -4   9   18.20    2.49   0
   6   4  -8   13.47    4.93   0
  -6   4   8   17.62    5.91   0
   6   4  -8   10.77    4.12   0
  -6  -4   8   14.47    3.31   0
   6  -4  -8    3.59    4.17   0
   6   4  -7   -0.18    2.52   0
  -6   4   7    2.53    3.82   0
   6   4  -7   -1.87    2.61   0
   6  -4  -7    1.19    3.33   0
  -6  -4   7   -1.05    1.79   0
   6   4  -6   78.86    9.91   0
  -6   4   6   66.27   10.96   0
   6   4  -6   70.86    9.35   0
  -6  -4   6   63.52    7.58   0
   6  -4  -6   75.92   10.99   0
   6   4  -5    0.08    2.85   0
  -6   4   5   -0.60    2.44   0
   6   4  -5    0.59    2.66   0
  -6  -4   5    2.46    2.60   0
   6  -4  -5    7.58    4.20   0
  -6   4   4   10.71    4.33   0
   6   4  -4   18.60    5.41   0
   6  -4  -4   22.62    5.91   0
  -6  -4   4   22.89    5.24   0
   6   4  -3   21.13    5.35   0
  -6   4   3   23.99    6.35   0
   6  -4  -3   12.83    4.50   0
  -6  -4   3   26.82    6.01   0
  -6   4   2  157.56   12.15   0
   6   4  -2  145.20   11.51   0
  -6  -4   2  135.06   10.88   0
   6  -4  -2  134.47   10.65   0
  -6   4   1    5.02    3.32   0
   6   4  -1    7.15    3.91   0
  -6   4   1    3.69    3.06   0
  -6  -4   1    8.77    4.21   0
   6  -4  -1    5.70    3.53   0
   6   4   0   24.46    5.76   0
  -6   4   0   20.82    5.04   0
  -6   4   0   22.28    5.11   0
   6  -4   0   31.12    5.53   0
  -6  -4   0   18.82    5.82   0
  -6   4  -1   86.04    7.74   0
  -6   4  -1  108.48    8.98   0
   6   4   1   89.34   10.95   0
  -6  -4  -1   91.57   11.11   0
   6  -4   1   95.85    7.14   0
  -6   4  -2   29.43    5.21   0
  -6   4  -2   34.22    5.99   0
   6   4   2   24.27    5.99   0
  -6  -4  -2   23.42    6.06   0
   6  -4   2   27.04    3.75   0
   6  -4   2   32.52    4.12   0
  -6   4  -3   51.09    6.61   0
   6   4   3   48.00    8.27   0
  -6   4  -3   46.20    6.16   0
  -6  -4  -3   50.48    9.07   0
  -6   4  -4   37.45    5.23   0
  -6   4  -4   23.67    4.60   0
   6   4   4   20.31    5.66   0
  -6  -4  -4   25.20    6.46   0
   6   4   5    8.82    4.38   0
  -6   4  -5    5.37    2.63   0
  -6   4  -5    7.37    2.63   0
  -6  -4  -5    1.86    3.35   0
  -6   4  -6   59.99    5.36   0
   6   4   6   59.89    9.53   0
  -6   4  -6   71.51    5.75   0
  -6  -4  -6   52.07    9.59   0
  -6   4  -7   63.85    5.33   0
   6   4   7   67.04    9.80   0
  -6   4  -7   65.58    5.17   0
  -6  -4  -7   49.39    9.49   0
  -6   4  -8   62.64    4.91   0
   6   4   8   58.43    9.18   0
  -6   4  -8   54.29    4.37   0
  -6  -4  -8   48.54    9.94   0
  -6   4  -9    3.10    1.75   0
  -6   4  -9    1.53    1.61   0
   6   4   9    3.30    3.53   0
  -6  -4  -9    5.38    4.82   0
  -6   4 -10    0.32    1.51   0
  -6  -4 -10   -2.33    3.92   0
  -6   4 -11    5.62    2.02   0
  -6  -4 -11    6.82    5.79   0
  -6  -4 -12   16.98    7.04   0
  -6  -4 -13    3.97    5.39   0
  -6  -4 -14   -4.86    4.65   0
   6   5 -15   17.74    6.38   0
   6  -5 -15   17.57    9.24   0
   6   5 -14   -0.60    3.72   0
   6  -5 -14   -2.78    5.44   0
   6   5 -13   -0.37    3.18   0
  -6   5  13    6.07    5.05   0
   6  -5 -13   -6.24    3.50   0
  -6   5  12   18.71    6.94   0
   6   5 -12   18.65    5.98   0
   6  -5 -12    1.05    4.93   0
  -6   5  11   15.25    7.61   0
   6   5 -11   18.15    5.92   0
   6  -5 -11   25.47    8.75   0
  -6   5  10    3.74    5.24   0
   6   5 -10   -3.48    2.47   0
   6  -5 -10   -2.25    4.06   0
   6   5  -9   22.04    6.07   0
  -6   5   9   21.84    7.87   0
   6  -5  -9   21.11    7.82   0
  -6   5   8    1.53    4.57   0
   6   5  -8   -3.17    3.12   0
  -6  -5   8    3.15    1.80   0
   6  -5  -8    2.47    4.26   0
   6   5  -7   55.22    9.19   0
  -6   5   7   44.84    9.85   0
  -6  -5   7   57.26    7.08   0
   6  -5  -7   59.73   10.54   0
  -6   5   6   38.44    8.69   0
   6   5  -6   30.83    6.94   0
   6  -5  -6   31.06    7.83   0
  -6  -5   6   42.67    6.55   0
  -6   5   5   12.29    5.35   0
   6   5  -5   14.45    5.13   0
  -6  -5   5    9.57    3.95   0
   6  -5  -5    5.77    4.07   0
   6   5  -4   32.77    7.11   0
  -6   5   4   25.03    7.11   0
   6  -5  -4   57.91    9.22   0
  -6  -5   4   34.48    6.59   0
  -6   5   3   71.52   10.74   0
   6   5  -3   64.33    9.30   0
  -6  -5   3   94.93   11.02   0
   6  -5  -3   74.11   10.47   0
  -6   5   2  148.09   12.40   0
   6   5  -2  112.77   12.83   0
  -6  -5   2  112.86   12.57   0
   6  -5  -2  120.74   10.64   0
  -6   5   1    1.55    3.08   0
   6   5  -1    0.13    2.89   0
  -6  -5   1    6.81    3.97   0
   6  -5  -1   -1.11    2.11   0
  -6   5   0   85.09   10.50   0
   6   5   0  106.51   12.70   0
   6  -5   0   85.81    9.42   0
  -6  -5   0   88.54   11.69   0
  -6   5  -1   28.20    6.02   0
  -6   5  -1   23.97    5.96   0
   6   5   1   12.00    5.04   0
   6  -5   1   31.65    5.14   0
  -6  -5  -1    8.44    4.60   0
  -6   5  -2  174.19   11.93   0
   6   5   2  135.59   15.02   0
  -6   5  -2  163.76   11.16   0
   6  -5   2  157.35    8.64   0
   6  -5   2  157.46    8.69   0
  -6  -5  -2  150.51   13.50   0
   6   5   3  225.97   16.31   0
  -6   5  -3  215.36   12.99   0
  -6   5  -3  239.49   13.90   0
  -6  -5  -3  215.85   16.32   0
  -6   5  -4   69.47    7.96   0
  -6   5  -4   65.86    8.33   0
   6   5   4   57.09   10.03   0
  -6  -5  -4   80.07   11.97   0
   6   5   5   32.01    7.64   0
  -6   5  -5   24.96    5.03   0
  -6   5  -5   27.67    5.12   0
  -6  -5  -5   12.06    5.61   0
  -6   5  -6   47.55    5.88   0
   6   5   6   16.44    5.91   0
  -6   5  -6   43.99    6.01   0
  -6  -5  -6   60.27   11.53   0
   6   5   7    7.39    4.45   0
  -6   5  -7   11.42    3.11   0
  -6   5  -7    7.73    2.91   0
  -6  -5  -7    2.23    4.00   0
  -6   5  -8    2.06    2.29   0
  -6   5  -8    2.75    2.13   0
   6   5   8    8.15    4.22   0
  -6  -5  -8   -0.91    4.12   0
  -6   5  -9    9.94    2.77   0
   6   5   9   18.52    6.11   0
  -6  -5  -9    7.63    5.35   0
   6   5  10   -1.63    3.12   0
  -6   5 -10   -0.18    1.77   0
  -6  -5 -10   -3.68    4.47   0
  -6  -5 -11    9.81    6.67   0
  -6  -5 -12    0.24    5.45   0
  -6  -5 -13    4.08    6.24   0
   6   6 -14    2.92    4.69   0
   6  -6 -14    1.67    6.24   0
   6   6 -13   33.90    8.31   0
  -6   6  13   12.53    6.76   0
   6  -6 -13   24.72    9.87   0
  -6   6  12    7.14    6.62   0
   6   6 -12   10.81    5.43   0
   6  -6 -12    5.07    6.49   0
   6   6 -11    5.78    4.51   0
  -6   6  11    1.42    5.13   0
   6  -6 -11   13.55    7.27   0
   6   6 -10   -1.48    3.15   0
  -6   6  10    3.37    5.88   0
   6  -6 -10    1.24    5.19   0
   6   6  -9   20.56    6.55   0
  -6   6   9   28.28    8.93   0
   6  -6  -9    6.55    5.93   0
  -6   6   8   11.50    7.13   0
   6   6  -8    9.32    4.66   0
   6  -6  -8   23.01    8.30   0
  -6   6   7    6.28    5.75   0
   6   6  -7   26.84    7.26   0
  -6  -6   7   26.73    4.89   0
   6  -6  -7   31.71    8.72   0
   6   6  -6    0.55    3.78   0
  -6   6   6   12.41    5.75   0
  -6  -6   6    1.26    2.70   0
   6  -6  -6    6.56    5.18   0
   6   6  -5   94.45   11.96   0
  -6   6   5   65.08   11.55   0
  -6  -6   5   70.00    9.06   0
   6  -6  -5   93.67   12.95   0
  -6   6   4    5.32    4.49   0
   6   6  -4    7.88    4.62   0
   6  -6  -4   -3.44    2.48   0
  -6  -6   4    0.82    3.08   0
  -6   6   3  180.92   15.49   0
   6   6  -3  187.10   15.06   0
   6  -6  -3  170.38   14.03   0
  -6  -6   3  168.82   13.22   0
  -6   6   2    1.45    2.99   0
   6   6  -2   -4.24    2.90   0
   6  -6  -2   -2.73    2.24   0
  -6  -6   2   -4.52    2.29   0
  -6   6   1    6.09    4.21   0
   6   6  -1    1.72    3.62   0
   6  -6  -1    3.51    3.58   0
  -6  -6   1    8.49    4.72   0
   6   6   0    9.85    4.84   0
  -6   6   0   14.71    5.67   0
  -6  -6   0   15.83    5.82   0
   6  -6   0    7.10    3.82   0
  -6   6  -1   33.58    7.06   0
   6   6   1   26.80    7.34   0
   6  -6   1   22.04    4.70   0
  -6  -6  -1   27.90    7.21   0
   6   6   2   18.20    6.69   0
  -6   6  -2   22.61    5.74   0
  -6   6  -2   31.83    6.41   0
  -6  -6  -2   17.72    6.35   0
   6  -6   2   21.00    3.81   0
   6   6   3   15.66    6.15   0
  -6   6  -3   11.25    4.38   0
  -6   6  -3   11.81    4.24   0
  -6  -6  -3   19.96    6.54   0
   6   6   4  169.43   17.83   0
  -6   6  -4  147.29   11.38   0
  -6   6  -4  135.15   10.47   0
  -6  -6  -4  124.69   15.75   0
  -6   6  -5    9.67    3.75   0
  -6   6  -5   12.48    4.56   0
   6   6   5   19.27    6.72   0
  -6  -6  -5   14.92    6.21   0
  -6   6  -6    1.80    2.51   0
   6   6   6   -1.75    3.02   0
  -6   6  -6   -3.84    2.38   0
  -6  -6  -6    4.43    4.67   0
  -6   6  -7   31.61    5.75   0
   6   6   7   39.02    8.98   0
  -6  -6  -7   18.96    7.09   0
   6   6   8    7.93    4.97   0
  -6   6  -8    8.57    3.36   0
  -6  -6  -8   19.32    7.54   0
  -6   6  -9   -1.55    2.21   0
   6   6   9    2.97    4.92   0
  -6  -6  -9    3.85    5.21   0
  -6   6 -10    2.54    2.27   0
   6   6  10   -3.78    3.43   0
  -6  -6 -10    2.17    5.77   0
  -6  -6 -11   19.93    8.89   0
  -6  -6 -12   -4.83    6.09   0
  -6   7  13    0.39    5.61   0
   6   7 -13   -0.67    3.74   0
   6  -7 -13   -1.31    5.32   0
   6   7 -12    0.52    4.09   0
  -6   7  12   -3.59    4.96   0
   6  -7 -12   -2.85    4.68   0
  -6   7  11   -5.90    5.93   0
   6   7 -11   10.71    6.14   0
   6  -7 -11    8.00    6.58   0
   6   7 -10   98.58   13.42   0
  -6   7  10   66.87   12.78   0
   6  -7 -10   50.60   12.53   0
   6   7  -9   -2.76    3.58   0
  -6   7   9   -0.88    5.13   0
   6  -7  -9    5.79    5.37   0
  -6   7   8   -0.30    5.43   0
   6   7  -8    0.97    3.76   0
   6  -7  -8    6.64    5.27   0
   6   7  -7   22.24    6.97   0
  -6   7   7   20.75    8.58   0
   6  -7  -7   38.29   10.40   0
  -6   7   6    7.91    6.23   0
   6   7  -6   -1.55    3.76   0
  -6  -7   6    0.48    2.56   0
   6  -7  -6   -1.06    3.67   0
  -6   7   5    1.98    4.18   0
   6   7  -5    2.22    4.16   0
  -6  -7   5    1.63    2.82   0
   6  -7  -5    1.28    3.76   0
   6   7  -4    1.67    4.62   0
  -6   7   4    6.47    5.03   0
   6  -7  -4   -2.24    3.43   0
  -6  -7   4    2.76    3.65   0
   6   7  -3   71.20   11.54   0
  -6   7   3   48.55   10.56   0
  -6  -7   3   64.23   10.21   0
   6  -7  -3   44.15    8.73   0
   6   7  -2   16.20    6.43   0
  -6   7   2   19.29    6.70   0
  -6  -7   2   13.82    5.91   0
   6  -7  -2    5.40    4.53   0
  -6   7   1   -4.05    3.19   0
   6   7  -1   -1.18    2.75   0
   6  -7  -1    2.86    3.31   0
  -6  -7   1    3.66    3.73   0
  -6   7   0   32.00    7.96   0
   6   7   0   36.00    8.71   0
   6  -7   0   39.24    7.09   0
  -6  -7   0   40.31    8.79   0
  -6   7  -1   12.22    5.39   0
   6   7   1   26.18    7.89   0
  -6  -7  -1   28.60    8.52   0
   6  -7   1   23.94    5.32   0
   6   7   2   16.49    7.13   0
  -6   7  -2    6.86    4.67   0
  -6  -7  -2   25.45    7.46   0
   6  -7   2   15.69    3.68   0
  -6   7  -3    9.14    4.96   0
   6   7   3   14.53    6.19   0
  -6  -7  -3    6.09    5.70   0
   6   7   4  160.70   19.05   0
  -6   7  -4  171.36   13.23   0
  -6  -7  -4  136.52   17.52   0
   6   7   5   97.41   14.51   0
  -6   7  -5  110.40   12.15   0
  -6  -7  -5  129.40   17.63   0
  -6   7  -6   14.53    4.60   0
   6   7   6   15.71    7.01   0
  -6  -7  -6    6.47    6.03   0
  -6   7  -7   25.47    5.93   0
   6   7   7   15.92    6.35   0
  -6  -7  -7   14.85    7.79   0
   6   7   8    0.57    4.85   0
  -6   7  -8   -4.81    2.38   0
  -6  -7  -8   -3.52    3.90   0
   6   7   9    3.07    5.35   0
  -6   7  -9    5.41    3.25   0
  -6  -7  -9    7.51    6.66   0
   6   7  10    2.98    5.08   0
  -6   7 -10    0.99    2.75   0
  -6  -7 -10    8.61    7.01   0
  -6  -7 -11   -0.62    5.53   0
   6   8 -12    2.09    4.89   0
  -6   8  12    0.76    7.82   0
   6  -8 -12   -4.98    5.25   0
  -6   8  11   42.26   11.96   0
   6   8 -11   33.33    9.06   0
   6  -8 -11   30.49   10.91   0
   6   8 -10   20.71    7.69   0
  -6   8  10   44.85   12.80   0
   6  -8 -10   32.90   10.45   0
  -6   8   9   -1.85    5.41   0
   6   8  -9   -0.88    5.17   0
   6  -8  -9    4.41    6.12   0
   6   8  -8    5.48    5.55   0
  -6   8   8   -4.06    4.55   0
   6  -8  -8    2.79    5.77   0
   6   8  -7    3.26    5.62   0
  -6   8   7    8.67    7.20   0
   6  -8  -7   10.10    6.42   0
  -6   8   6   12.24    7.70   0
   6   8  -6   15.55    7.17   0
   6  -8  -6   19.83    7.60   0
  -6   8   5    9.51    6.90   0
   6   8  -5    5.91    5.84   0
  -6  -8   5    6.70    4.01   0
   6  -8  -5   14.89    7.62   0
   6   8  -4   -6.37    3.93   0
  -6   8   4    2.73    5.06   0
   6  -8  -4    3.84    5.16   0
  -6  -8   4    7.65    4.90   0
   6   8  -3   53.93   11.26   0
   6  -8  -3   61.86   11.36   0
  -6  -8   3   61.35   10.37   0
   6   8  -2   59.16   11.20   0
  -6   8   2   49.34   10.73   0
   6  -8  -2   74.59   11.59   0
  -6  -8   2   77.39   12.21   0
  -6   8   1  124.73   16.40   0
   6   8  -1  120.76   17.12   0
   6  -8  -1  136.68   15.09   0
  -6  -8   1  129.47   15.59   0
  -6   8   0   17.22    7.00   0
   6   8   0    8.64    6.00   0
  -6  -8   0   23.96    7.38   0
   6  -8   0   10.88    4.85   0
  -6   8  -1    1.16    4.31   0
   6   8   1   -1.23    3.81   0
   6  -8   1    4.30    3.62   0
  -6  -8  -1    4.31    5.00   0
  -6   8  -2  119.99   14.78   0
   6   8   2  134.33   17.42   0
  -6  -8  -2  115.45   16.02   0
  -6   8  -3  163.40   14.34   0
   6   8   3  102.44   16.01   0
  -6  -8  -3  138.04   18.32   0
  -6   8  -4   -0.22    3.75   0
   6   8   4    2.40    5.14   0
  -6  -8  -4   -1.75    4.04   0
   6   8   5    4.55    5.94   0
  -6   8  -5   20.88    6.35   0
  -6  -8  -5    6.41    6.20   0
   6   8   6    3.06    6.27   0
  -6   8  -6    9.71    4.91   0
  -6  -8  -6    0.59    5.36   0
  -6   8  -7   12.88    5.16   0
   6   8   7   28.08    9.73   0
  -6  -8  -7   10.04    6.80   0
   6   8   8    0.74    5.25   0
  -6   8  -8    0.93    3.80   0
  -6  -8  -8   -1.46    5.92   0
   6   8   9    5.43    6.35   0
  -6   8  -9    2.36    3.33   0
  -6  -8  -9   -2.74    5.15   0
  -6  -8 -10   -3.43    4.07   0
  -6   9  10   12.52    9.26   0
   6   9 -10    9.41    7.11   0
   6  -9 -10    3.50    6.03   0
  -6   9   9    7.07    8.20   0
   6   9  -9    2.39    5.72   0
   6  -9  -9   -3.66    4.39   0
  -6   9   8   -2.05    5.73   0
   6   9  -8    1.10    6.14   0
   6  -9  -8   -1.86    6.31   0
   6   9  -7    4.18    5.33   0
  -6   9   7    3.72    6.07   0
   6  -9  -7    7.00    6.90   0
  -6   9   6   18.78    9.22   0
   6   9  -6   20.61    7.83   0
   6  -9  -6    7.75    6.14   0
  -6   9   5    7.05    6.16   0
   6   9  -5   17.68    7.85   0
   6  -9  -5    4.79    6.03   0
   6   9  -4   41.47   11.11   0
  -6   9   4   27.37    9.21   0
   6  -9  -4   25.62    8.09   0
   6   9  -3    0.07    4.74   0
  -6   9   3    4.72    6.03   0
   6  -9  -3    8.13    5.12   0
  -6  -9   3    4.31    4.19   0
  -6   9   2   -0.70    5.05   0
   6   9  -2    1.49    5.38   0
   6  -9  -2    5.27    4.39   0
  -6  -9   2    5.17    4.96   0
  -6   9   1    5.35    6.28   0
   6   9  -1   25.00    9.10   0
  -6  -9   1    8.33    5.76   0
   6  -9  -1    8.24    4.91   0
  -6   9   0    1.33    4.33   0
   6   9   0   -2.61    4.59   0
  -6  -9   0   -5.74    3.38   0
  -6   9  -1   -2.70    4.34   0
   6   9   1    3.16    5.13   0
  -6  -9  -1    6.77    5.96   0
   6   9   2  158.81   20.75   0
  -6   9  -2  105.96   15.02   0
  -6  -9  -2   91.56   15.32   0
   6   9   3   85.76   15.76   0
  -6   9  -3  101.63   14.30   0
  -6  -9  -3  123.50   17.58   0
   6   9   4   20.43    8.68   0
  -6   9  -4   13.97    6.70   0
  -6  -9  -4   17.24    8.45   0
   6   9   5   -7.02    4.50   0
  -6   9  -5   -1.16    4.69   0
  -6  -9  -5   -0.02    4.69   0
  -6   9  -6    4.98    4.70   0
   6   9   6   11.74    8.05   0
  -6  -9  -6    3.15    6.74   0
  -6   9  -7   -2.06    3.71   0
   6   9   7   -0.63    5.71   0
  -6  -9  -7   -0.25    6.88   0
  -6   9  -8    0.32    3.73   0
   6   9   8    8.47    7.63   0
  -6  -9  -8   -0.67    5.84   0
  -6   9  -9    3.48    4.52   0
  -6  -9  -9    0.07    6.56   0
   6  10  -8   -8.43    5.24   0
  -6  10   8    4.48    7.86   0
   6 -10  -8   -0.41    6.56   0
   6  10  -7    0.91    5.37   0
  -6  10   7   -2.39    6.14   0
   6 -10  -7   -3.11    5.57   0
   6  10  -6   -9.73    4.59   0
  -6  10   6   14.55    8.83   0
   6 -10  -6    5.00    5.26   0
   6  10  -5   17.51    8.88   0
  -6  10   5    8.73    7.09   0
   6 -10  -5    1.71    4.71   0
  -6  10   4    1.59    6.06   0
   6  10  -4    4.64    6.34   0
   6 -10  -4   15.43    7.50   0
  -6  10   3   18.61    9.38   0
   6  10  -3   26.07   10.49   0
   6 -10  -3   25.11    8.57   0
  -6  10   2    2.18    6.00   0
   6  10  -2    4.65    7.73   0
  -6  10   1    2.81    6.17   0
   6  10  -1    9.71    8.08   0
  -6 -10   1    8.61    5.50   0
  -6  10   0   31.75   10.75   0
   6  10   0   67.25   15.20   0
  -6 -10   0   24.95    8.68   0
   6  10   1   14.92    8.47   0
  -6  10  -1    1.71    5.47   0
  -6 -10  -1   -2.42    5.06   0
  -6  10  -2   15.80    7.77   0
   6  10   2   11.11    8.10   0
  -6 -10  -2   17.22    9.30   0
  -6  10  -3   13.12    7.21   0
   6  10   3    8.31    8.63   0
  -6 -10  -3    7.90    6.86   0
   6  10   4   23.05   11.19   0
  -6  10  -4   -2.25    4.45   0
  -6 -10  -4   16.72    8.66   0
   6  10   5    8.57    7.62   0
  -6  10  -5   15.59    7.32   0
  -6 -10  -5    0.36    5.87   0
  -6  10  -6    3.31    4.83   0
   6  10   6   -0.32    6.41   0
  -6 -10  -6    0.87    6.72   0
  -6  11   4    7.22    9.02   0
   6  11  -4   49.78   13.93   0
  -6  11   3    2.20    6.80   0
   6  11  -3    4.59    8.02   0
   6  11  -2    2.05    8.05   0
  -6  11   2   10.86    8.23   0
  -6  11   1    3.25    7.18   0
   6  11  -1   -2.28    4.84   0
   6  11   0   -1.83    7.51   0
  -6  11   0    9.09    7.25   0
   6  11   1   49.82   14.63   0
  -6  11  -1   24.72    9.76   0
  -6 -11  -1   53.59   12.84   0
   6  11   2   -3.36    6.17   0
  -6  11  -2    9.42    7.38   0
  -6 -11  -2   27.28    9.75   0
   7   0 -17   -4.04    4.00   0
   7   0 -16    2.96    5.05   0
   7   0 -15   -3.42    4.27   0
   7   0 -14    0.78    4.04   0
   7   0 -13    0.80    4.30   0
  -7   0  12   19.97    4.81   0
   7   0 -12   21.81    6.84   0
   7   0 -11   -4.16    2.59   0
  -7   0  11    1.24    2.73   0
   7   0 -10   -0.23    2.95   0
  -7   0  10    3.26    2.98   0
  -7   0   9    1.44    2.47   0
   7   0  -9    1.29    2.92   0
   7   0  -8   98.02   11.55   0
  -7   0   8  114.59    9.88   0
  -7   0   7   -1.16    2.33   0
   7   0  -7   -1.30    2.58   0
  -7   0   6    4.76    3.31   0
   7   0  -6    5.17    3.73   0
  -7   0   5    3.03    2.81   0
   7   0  -5    1.45    2.77   0
   7   0  -4   12.17    4.54   0
  -7   0   4   14.69    4.44   0
   7   0  -4   18.56    5.48   0
   7   0  -3    7.12    3.55   0
  -7   0   3    6.64    3.61   0
  -7   0   3   17.69    6.49   0
   7   0  -3    5.96    3.38   0
   7   0  -2  186.24   11.75   0
  -7   0   2  171.47   11.51   0
  -7   0   2  188.34   11.62   0
   7   0  -2  172.37   11.31   0
   7   0  -1    1.25    2.70   0
   7   0  -1    6.14    3.26   0
  -7   0   1    1.92    2.57   0
  -7   0   1    7.64    3.86   0
  -7   0   0   20.36    4.63   0
  -7   0   0   17.75    4.57   0
   7   0   0    9.95    3.56   0
   7   0   0   15.83    4.12   0
  -7   0  -1   -0.82    2.40   0
   7   0   1   -0.76    1.98   0
   7   0   1    0.19    2.13   0
  -7   0  -1   -3.40    2.32   0
  -7   0  -2  267.68   14.70   0
   7   0   2  258.91   13.47   0
  -7   0  -2  279.48   14.46   0
   7   0   2  287.68   13.81   0
   7   0   3   -0.02    1.89   0
  -7   0  -3    0.13    2.30   0
  -7   0  -3    1.99    2.49   0
   7   0   3    3.20    2.20   0
  -7   0  -4   16.14    4.15   0
   7   0   4   19.01    3.56   0
   7   0   4   22.88    3.90   0
  -7   0  -4   13.56    3.91   0
   7   0   5    0.39    1.32   0
  -7   0  -5   -1.08    2.01   0
  -7   0  -5   -1.40    2.05   0
   7   0   5   -0.40    1.33   0
  -7   0  -6   47.85    6.90   0
  -7   0  -6   47.73    6.97   0
  -7   0  -7   -0.29    2.08   0
  -7   0  -7   -0.67    2.23   0
  -7   0  -8   -0.65    2.32   0
  -7   0  -8    3.93    3.11   0
  -7   0  -9    0.14    2.49   0
  -7   0  -9    3.03    2.93   0
  -7   0  -9    1.74    2.42   0
  -7   0 -10   92.88   10.79   0
  -7   0 -11    3.28    3.58   0
  -7   0 -12   25.63    6.52   0
  -7   0 -13    2.22    3.65   0
  -7   0 -14   -2.45    4.13   0
  -7   0 -15    0.10    4.41   0
   7   1 -17   15.12    7.07   0
   7  -1 -17   27.67    9.52   0
   7   1 -16   14.73    6.68   0
   7  -1 -16    6.27    5.66   0
   7   1 -15   24.41    8.08   0
   7  -1 -15   25.27    8.56   0
   7   1 -14    2.52    4.19   0
   7  -1 -14   -3.27    4.00   0
   7   1 -13   11.54    5.39   0
   7  -1 -13   -1.80    3.83   0
  -7   1  12    2.77    3.10   0
   7   1 -12   -0.48    3.49   0
   7  -1 -12   -1.68    3.66   0
   7   1 -11   -1.28    3.28   0
  -7   1  11    1.10    3.14   0
  -7  -1  11    1.14    2.20   0
   7  -1 -11   -0.93    3.52   0
   7   1 -10    3.94    3.54   0
  -7   1  10   -2.17    2.33   0
   7  -1 -10   -0.99    3.40   0
  -7  -1  10    0.54    2.36   0
  -7   1   9   28.94    6.53   0
   7   1  -9   35.94    7.17   0
  -7  -1   9   32.97    5.98   0
   7  -1  -9   35.50    7.53   0
  -7   1   8   44.55    7.78   0
   7   1  -8   44.01    7.63   0
   7  -1  -8   42.19    8.01   0
  -7  -1   8   41.93    6.62   0
  -7   1   7  123.50   10.80   0
   7   1  -7  135.40   10.89   0
   7  -1  -7  126.71   11.04   0
  -7  -1   7  142.13   10.41   0
  -7   1   6   29.99    6.10   0
   7   1  -6   17.24    5.15   0
   7   1  -6   10.49    5.10   0
   7  -1  -6   19.43    5.45   0
  -7  -1   6   15.04    4.41   0
   7   1  -5   35.26    6.43   0
  -7   1   5   24.92    5.74   0
   7   1  -5   35.93    6.36   0
  -7  -1   5   35.76    6.11   0
   7  -1  -5   25.79    6.09   0
  -7   1   4   26.25    5.71   0
   7   1  -4   28.51    5.71   0
   7   1  -4   34.93    6.09   0
  -7  -1   4   30.00    5.96   0
   7  -1  -4   49.94    7.78   0
   7   1  -3  516.02   23.31   0
   7   1  -3  489.34   22.96   0
  -7   1   3  481.79   23.25   0
   7  -1  -3  518.64   23.15   0
  -7  -1   3  490.77   23.09   0
   7   1  -2  199.28   12.23   0
  -7   1   2  198.45   12.67   0
  -7   1   2  192.60   12.25   0
   7   1  -2  206.46   12.49   0
   7  -1  -2  183.20   13.04   0
  -7  -1   2  208.58   12.39   0
  -7  -1   2  201.03   12.67   0
   7  -1  -2  193.90   12.00   0
  -7   1   1    6.79    3.26   0
   7   1  -1    4.56    2.88   0
   7   1  -1    9.41    3.64   0
  -7   1   1   18.73    4.74   0
  -7  -1   1   10.24    3.89   0
  -7  -1   1    3.80    2.77   0
   7  -1  -1   15.47    4.19   0
   7  -1  -1    6.38    3.47   0
  -7   1   0   66.15    8.06   0
   7   1   0   47.79    6.69   0
  -7   1   0   67.29    7.96   0
  -7  -1   0   48.87    7.25   0
   7  -1   0   71.29    7.47   0
  -7  -1   0   56.27    7.66   0
   7  -1   0   61.28    6.92   0
  -7   1  -1  483.71   21.22   0
  -7   1  -1  463.95   20.90   0
   7   1   1  448.11   21.18   0
   7  -1   1  484.58   20.31   0
  -7  -1  -1  466.93   22.12   0
  -7  -1  -1  475.08   21.75   0
   7  -1   1  460.12   20.29   0
  -7   1  -2   24.21    4.53   0
   7   1   2   27.87    5.19   0
  -7   1  -2   15.42    4.03   0
  -7  -1  -2   34.04    6.20   0
   7  -1   2   13.77    3.38   0
   7  -1   2   19.94    3.75   0
  -7  -1  -2   27.10    5.26   0
  -7   1  -3   18.54    4.18   0
  -7   1  -3   18.33    4.04   0
   7   1   3   14.40    3.91   0
  -7  -1  -3   18.53    4.67   0
  -7  -1  -3   13.65    4.02   0
   7  -1   3   14.79    3.00   0
   7  -1   3   13.88    2.99   0
   7   1   4   34.70    5.23   0
  -7   1  -4   25.55    4.76   0
  -7   1  -4   33.46    5.27   0
  -7  -1  -4   30.06    5.71   0
   7  -1   4   29.64    2.64   0
  -7  -1  -4   28.08    5.80   0
  -7   1  -5  102.20    7.84   0
   7   1   5  102.86    7.54   0
  -7   1  -5  102.43    7.59   0
  -7  -1  -5  114.41    9.48   0
  -7  -1  -5   94.65   10.26   0
   7   1   6   12.07    3.25   0
  -7   1  -6   17.45    3.96   0
  -7   1  -6   16.07    3.96   0
  -7  -1  -6   13.72    4.53   0
  -7  -1  -6   14.63    4.60   0
   7   1   7    4.12    1.95   0
  -7   1  -7    5.73    2.62   0
  -7   1  -7    4.96    3.10   0
  -7  -1  -7    5.75    3.37   0
  -7  -1  -7    4.07    3.50   0
  -7  -1  -7    2.33    2.58   0
   7   1   8    9.92    1.86   0
   7   1   8    9.80    1.67   0
  -7   1  -8    9.43    3.38   0
  -7   1  -8   11.92    3.62   0
  -7  -1  -8   11.75    4.46   0
  -7  -1  -8   10.98    4.49   0
  -7   1  -9   41.38    6.40   0
  -7   1  -9   54.11    7.16   0
  -7  -1  -9   30.79    6.72   0
  -7  -1  -9   39.56    7.73   0
  -7   1 -10   32.08    5.92   0
  -7  -1 -10   20.95    6.13   0
  -7   1 -11   20.97    5.40   0
  -7  -1 -11    6.08    4.23   0
  -7   1 -12    7.58    3.79   0
  -7  -1 -12   12.00    6.08   0
  -7   1 -13    7.52    4.18   0
  -7  -1 -13    6.28    4.97   0
  -7   1 -14    1.84    3.68   0
  -7  -1 -14    3.18    4.60   0
  -7   1 -15   14.76    5.79   0
  -7  -1 -15   14.71    6.58   0
   7   2 -17   11.11    6.53   0
   7  -2 -17    0.88    6.22   0
   7   2 -16   -0.09    4.56   0
   7  -2 -16    2.56    5.90   0
   7   2 -15   20.47    6.75   0
   7  -2 -15   12.45    7.56   0
   7   2 -14    7.42    4.90   0
   7  -2 -14    6.30    5.91   0
   7   2 -13   -4.96    2.68   0
  -7   2  13   -1.22    3.83   0
   7  -2 -13    0.55    4.57   0
  -7   2  12    8.08    4.82   0
   7   2 -12    6.21    4.45   0
   7  -2 -12   -4.12    3.48   0
   7   2 -11    1.50    3.51   0
  -7   2  11   10.08    4.93   0
   7  -2 -11    7.35    4.86   0
  -7  -2  11    2.39    1.86   0
   7   2 -10   13.32    4.93   0
  -7   2  10    7.73    4.55   0
   7  -2 -10   13.28    6.12   0
  -7  -2  10    6.01    2.62   0
  -7   2   9   -1.18    2.74   0
   7   2  -9    3.98    3.92   0
  -7  -2   9    0.97    2.21   0
   7  -2  -9   -2.94    2.40   0
  -7   2   8  160.54   12.94   0
   7   2  -8  156.94   12.32   0
  -7  -2   8  161.38   10.98   0
   7  -2  -8  181.42   14.11   0
   7   2  -7    9.93    4.26   0
  -7   2   7    5.59    3.84   0
   7  -2  -7    9.16    4.87   0
  -7  -2   7    3.58    2.81   0
   7   2  -6    2.00    3.19   0
   7   2  -6    2.87    3.16   0
  -7   2   6   -1.65    2.24   0
   7  -2  -6    1.05    2.65   0
  -7  -2   6    5.92    3.32   0
   7   2  -5   24.21    5.69   0
  -7   2   5   11.92    4.30   0
   7   2  -5   15.23    4.68   0
   7  -2  -5   27.07    6.35   0
  -7  -2   5   17.64    4.73   0
   7   2  -4   10.79    4.47   0
   7   2  -4   18.73    5.46   0
  -7   2   4   19.97    5.59   0
  -7  -2   4   19.53    4.94   0
   7  -2  -4   22.27    5.51   0
  -7   2   3    3.64    3.30   0
   7   2  -3    1.61    3.14   0
   7  -2  -3    1.33    2.60   0
  -7  -2   3   -0.99    2.71   0
  -7   2   2   69.57    8.51   0
  -7   2   2   90.79    9.84   0
   7   2  -2   91.22    8.24   0
  -7  -2   2   92.99   10.06   0
   7  -2  -2  100.56   10.51   0
   7   2  -1  138.92   10.56   0
  -7   2   1  149.87   10.72   0
  -7   2   1  152.58   10.39   0
   7  -2  -1  137.93    9.98   0
  -7  -2   1  134.86   10.49   0
  -7   2   0   41.58    6.25   0
   7   2   0   26.79    5.66   0
  -7   2   0   34.34    5.89   0
   7  -2   0   42.35    6.14   0
  -7  -2   0   27.21    6.37   0
   7  -2   0   38.67    5.73   0
  -7   2  -1   64.66    7.96   0
  -7   2  -1   71.51    7.97   0
   7   2   1   55.48    7.80   0
   7  -2   1   66.36    7.05   0
   7  -2   1   69.20    5.94   0
  -7  -2  -1   64.12    8.58   0
  -7   2  -2  197.08   11.35   0
  -7   2  -2  191.25   11.63   0
   7   2   2  226.96   13.26   0
  -7  -2  -2  209.97   13.51   0
   7  -2   2  177.62    9.69   0
   7  -2   2  203.38   10.09   0
   7   2   3   38.37    6.46   0
  -7   2  -3   49.11    6.16   0
  -7   2  -3   52.86    6.53   0
   7  -2   3   43.57    3.34   0
  -7  -2  -3   28.44    5.96   0
  -7   2  -4    0.59    2.02   0
  -7   2  -4    0.56    1.87   0
   7   2   4   -0.06    2.30   0
  -7  -2  -4    2.88    3.30   0
  -7   2  -5   48.01    5.94   0
  -7   2  -5   52.03    6.20   0
   7   2   5   48.42    6.85   0
  -7  -2  -5   60.70    8.65   0
   7   2   6   22.14    4.82   0
  -7   2  -6   21.08    4.07   0
  -7   2  -6   18.17    4.03   0
  -7  -2  -6   10.85    4.67   0
   7   2   7    2.06    2.51   0
  -7   2  -7    0.53    2.01   0
  -7   2  -7    2.95    2.13   0
  -7  -2  -7    2.10    3.36   0
   7   2   8   52.15    6.93   0
  -7   2  -8   52.22    6.16   0
  -7   2  -8   52.28    6.23   0
  -7  -2  -8   62.27    9.86   0
   7   2   9   33.08    5.64   0
  -7   2  -9   21.08    4.29   0
  -7   2  -9   29.22    5.05   0
  -7  -2  -9   26.40    7.19   0
  -7   2 -10   38.74    5.71   0
  -7  -2 -10   28.10    7.52   0
  -7   2 -11   -0.52    2.58   0
  -7  -2 -11   -6.38    2.89   0
  -7   2 -12    1.08    2.73   0
  -7  -2 -12   -2.33    3.76   0
  -7   2 -13    1.64    3.19   0
  -7  -2 -13   -0.25    4.71   0
  -7   2 -14   14.35    4.74   0
  -7  -2 -14   15.70    7.29   0
   7   3 -16    4.24    5.20   0
   7  -3 -16    5.79    7.87   0
   7   3 -15    0.00    4.09   0
   7  -3 -15    1.49    5.41   0
   7   3 -14   15.47    6.18   0
   7  -3 -14   20.20    8.58   0
   7   3 -13    0.54    3.42   0
  -7   3  13    3.99    4.40   0
   7  -3 -13   -7.75    2.77   0
   7   3 -12   28.35    7.19   0
  -7   3  12   18.35    6.31   0
   7  -3 -12   16.83    6.62   0
   7   3 -11    3.54    3.50   0
  -7   3  11    0.31    3.70   0
   7  -3 -11    3.78    4.44   0
  -7   3  10   -0.82    3.39   0
   7   3 -10    4.40    3.86   0
  -7  -3  10    2.73    1.99   0
   7  -3 -10    2.40    3.90   0
   7   3  -9  121.82   13.16   0
  -7   3   9  129.17   14.88   0
   7  -3  -9   97.75   13.03   0
  -7  -3   9  125.31    8.54   0
  -7   3   8   -1.08    3.08   0
   7   3  -8    7.62    4.42   0
   7  -3  -8    6.73    4.17   0
  -7  -3   8    4.68    2.50   0
   7   3  -7   12.09    4.71   0
  -7   3   7    8.06    4.38   0
   7  -3  -7   17.08    6.04   0
  -7  -3   7   14.05    4.01   0
  -7   3   6    7.88    4.06   0
   7   3  -6    5.74    3.37   0
  -7  -3   6    7.34    3.25   0
   7  -3  -6    2.61    3.16   0
   7   3  -5    2.88    3.25   0
  -7   3   5    1.28    3.56   0
   7  -3  -5    1.93    3.26   0
  -7  -3   5   -0.11    2.22   0
  -7   3   4    7.62    3.80   0
   7   3  -4   14.48    5.03   0
   7  -3  -4   17.61    5.26   0
  -7  -3   4    6.81    3.69   0
   7   3  -3  126.12   12.97   0
  -7   3   3  107.10   12.51   0
   7  -3  -3  116.92   12.41   0
  -7  -3   3  111.16    9.75   0
  -7   3   2   -0.56    2.91   0
   7   3  -2    9.07    3.83   0
  -7  -3   2    3.76    3.27   0
   7  -3  -2    1.91    2.55   0
   7   3  -1  499.95   24.11   0
  -7   3   1  530.87   23.82   0
  -7   3   1  535.20   24.23   0
  -7  -3   1  486.91   24.14   0
   7  -3  -1  442.96   22.17   0
   7   3   0   53.12    8.05   0
  -7   3   0   44.79    7.07   0
  -7   3   0   47.33    6.90   0
  -7  -3   0   39.27    7.55   0
   7  -3   0   50.56    6.83   0
  -7   3  -1  625.48   26.38   0
   7   3   1  648.52   28.40   0
  -7   3  -1  561.52   26.12   0
  -7  -3  -1  593.91   28.26   0
   7  -3   1  571.72   24.38   0
   7  -3   1  644.28   24.92   0
   7   3   2   -3.11    2.43   0
  -7   3  -2    4.94    3.18   0
  -7   3  -2    1.05    2.05   0
  -7  -3  -2    2.82    3.25   0
   7  -3   2    2.57    1.89   0
   7  -3   2   -0.41    1.48   0
  -7   3  -3   47.26    6.42   0
  -7   3  -3   52.02    6.57   0
   7   3   3   40.35    7.26   0
  -7  -3  -3   39.86    7.72   0
  -7   3  -4   27.54    4.84   0
   7   3   4   25.95    5.98   0
  -7   3  -4   23.87    4.40   0
  -7  -3  -4   28.42    6.64   0
  -7   3  -5   37.36    5.10   0
   7   3   5   20.76    5.45   0
  -7   3  -5   27.06    4.70   0
  -7  -3  -5   32.06    7.35   0
  -7   3  -6   -3.13    1.53   0
   7   3   6   -0.12    2.59   0
  -7   3  -6    2.68    1.98   0
  -7  -3  -6    2.61    3.39   0
  -7   3  -7    0.41    1.97   0
  -7   3  -7    5.93    2.74   0
   7   3   7    1.34    2.71   0
  -7  -3  -7    0.96    3.65   0
  -7   3  -8    6.34    2.63   0
   7   3   8    6.90    3.60   0
  -7   3  -8    5.79    2.43   0
  -7  -3  -8    8.06    4.95   0
  -7   3  -9   26.42    4.35   0
  -7   3  -9   26.62    4.12   0
   7   3   9   25.67    5.57   0
  -7  -3  -9   22.46    7.07   0
  -7   3 -10    4.77    2.64   0
  -7  -3 -10    3.97    4.93   0
  -7   3 -11   26.17    4.40   0
  -7  -3 -11   14.75    6.74   0
  -7   3 -12   24.02    4.62   0
  -7  -3 -12   19.71    7.43   0
  -7  -3 -13    5.10    5.45   0
  -7  -3 -14    7.77    6.88   0
   7   4 -16    9.12    6.23   0
   7  -4 -16    4.55    7.17   0
   7   4 -15    1.58    4.57   0
   7  -4 -15   -0.02    6.22   0
   7   4 -14    0.28    3.89   0
   7  -4 -14    0.71    4.93   0
   7   4 -13   14.15    5.55   0
  -7   4  13   15.81    6.79   0
   7  -4 -13    5.81    5.96   0
  -7   4  12    6.77    5.62   0
   7   4 -12   23.69    6.79   0
   7  -4 -12   18.10    7.86   0
   7   4 -11   11.23    4.93   0
  -7   4  11    5.11    5.26   0
   7  -4 -11    8.38    5.74   0
  -7   4  10    9.27    5.52   0
   7   4 -10    6.10    4.73   0
   7  -4 -10   12.44    6.24   0
  -7   4   9    7.99    5.57   0
   7   4  -9   12.83    5.24   0
   7  -4  -9   16.60    6.65   0
  -7  -4   9   14.91    3.57   0
  -7   4   8   49.67    9.86   0
   7   4  -8   52.94    8.98   0
  -7  -4   8   57.87    7.35   0
   7  -4  -8   45.46    9.71   0
  -7   4   7   40.66    8.77   0
   7   4  -7   53.98    8.62   0
   7  -4  -7   42.65    9.02   0
  -7  -4   7   38.75    6.68   0
  -7   4   6    2.66    3.57   0
   7   4  -6    4.11    3.70   0
  -7  -4   6   11.96    3.99   0
   7  -4  -6   -1.44    3.37   0
   7   4  -5  119.16   10.79   0
  -7   4   5  103.04   12.63   0
   7  -4  -5  128.42   14.22   0
  -7  -4   5  133.56   10.42   0
   7   4  -4    3.56    3.40   0
  -7   4   4    9.53    4.79   0
   7  -4  -4    7.90    4.43   0
  -7  -4   4   11.81    4.23   0
  -7   4   3   12.27    4.90   0
   7   4  -3   13.71    4.92   0
   7  -4  -3    9.80    4.48   0
  -7  -4   3   11.56    4.36   0
   7   4  -2    0.07    2.57   0
  -7   4   2    0.29    2.80   0
  -7  -4   2    2.26    3.42   0
   7  -4  -2    0.92    2.81   0
   7   4  -1  128.26   11.14   0
  -7   4   1  122.45   10.82   0
   7  -4  -1  123.37    9.90   0
  -7  -4   1  125.13   11.24   0
  -7   4   0   12.35    4.21   0
  -7   4   0   20.37    5.40   0
   7   4   0    1.76    3.04   0
  -7  -4   0    1.88    3.37   0
   7  -4   0   11.39    3.84   0
  -7   4  -1  236.33   13.46   0
  -7   4  -1  186.32   12.76   0
   7   4   1  158.11   13.06   0
  -7  -4  -1  204.65   14.64   0
   7  -4   1  187.67   11.01   0
  -7   4  -2   40.14    6.47   0
   7   4   2   20.14    5.68   0
  -7   4  -2   38.01    6.44   0
   7  -4   2   41.56    4.77   0
  -7  -4  -2   43.89    8.41   0
   7  -4   2   38.86    4.65   0
  -7   4  -3   11.81    3.79   0
   7   4   3    1.94    3.66   0
  -7   4  -3   10.15    3.66   0
  -7  -4  -3   12.05    4.92   0
  -7   4  -4    5.27    2.55   0
  -7   4  -4    2.89    2.46   0
   7   4   4    4.81    3.36   0
  -7  -4  -4   -1.25    2.41   0
   7   4   5    3.65    3.76   0
  -7   4  -5    2.15    2.03   0
  -7   4  -5   -1.11    1.98   0
  -7  -4  -5    0.53    3.56   0
   7   4   6   65.32    9.85   0
  -7   4  -6   54.87    6.67   0
  -7   4  -6   68.65    7.09   0
  -7  -4  -6   66.91   10.97   0
  -7   4  -7   -0.88    1.63   0
   7   4   7   -7.01    2.10   0
  -7   4  -7   -0.07    2.06   0
  -7  -4  -7    8.53    5.02   0
  -7   4  -8   11.11    2.98   0
  -7   4  -8   11.79    2.87   0
   7   4   8    9.53    4.48   0
  -7  -4  -8    7.33    5.23   0
  -7   4  -9   28.75    4.36   0
   7   4   9   35.54    7.32   0
  -7  -4  -9   33.24    8.97   0
  -7   4 -10   39.45    4.99   0
  -7  -4 -10   47.20   11.00   0
  -7   4 -11   23.19    3.81   0
  -7  -4 -11   23.35    8.18   0
  -7  -4 -12    3.59    5.53   0
  -7  -4 -13   14.80    7.43   0
   7   5 -15   10.66    5.89   0
   7  -5 -15   11.68    8.39   0
   7   5 -14   20.41    7.75   0
   7  -5 -14   29.39   10.21   0
   7   5 -13    8.23    5.09   0
  -7   5  13   14.85    7.20   0
   7  -5 -13    2.21    5.88   0
  -7   5  12   19.76    8.18   0
   7   5 -12   18.43    6.68   0
   7  -5 -12    8.68    6.78   0
   7   5 -11    2.33    4.07   0
  -7   5  11   11.70    5.96   0
   7  -5 -11   10.17    6.67   0
  -7   5  10    2.18    5.37   0
   7   5 -10    1.70    3.92   0
   7  -5 -10   12.89    6.67   0
   7   5  -9    3.77    3.58   0
  -7   5   9    4.87    5.53   0
   7  -5  -9    4.56    4.89   0
   7   5  -8   12.21    4.98   0
  -7   5   8    3.36    5.13   0
  -7  -5   8    6.85    3.14   0
   7  -5  -8   18.74    7.35   0
   7   5  -7   53.83    9.55   0
  -7   5   7   53.49   10.43   0
  -7  -5   7   56.22    7.64   0
   7  -5  -7   46.69    9.88   0
   7   5  -6   11.76    5.14   0
  -7   5   6    8.46    5.21   0
   7  -5  -6    7.08    4.49   0
  -7  -5   6    8.14    3.80   0
   7   5  -5  106.52   12.43   0
  -7   5   5   81.57   12.13   0
  -7  -5   5  100.72   11.49   0
   7  -5  -5   82.63   11.88   0
   7   5  -4   59.98    9.52   0
  -7   5   4   75.83   11.62   0
  -7  -5   4   72.38    9.94   0
   7  -5  -4   75.03   11.15   0
   7   5  -3    8.19    4.37   0
  -7   5   3   10.89    4.69   0
  -7  -5   3    7.64    4.04   0
   7  -5  -3   18.83    5.88   0
   7   5  -2   31.44    7.45   0
  -7   5   2   27.27    6.73   0
  -7  -5   2   28.42    6.52   0
   7  -5  -2   34.91    7.10   0
   7   5  -1   44.01    9.08   0
  -7   5   1   39.95    7.83   0
  -7  -5   1   43.41    8.09   0
   7  -5  -1   37.19    7.07   0
  -7   5   0    1.07    3.00   0
   7   5   0    3.78    3.44   0
  -7  -5   0   -2.30    2.33   0
   7  -5   0    3.51    2.76   0
  -7   5  -1   85.16    9.94   0
  -7   5  -1  100.22   11.12   0
   7   5   1   71.27   10.41   0
   7  -5   1   81.38    7.09   0
  -7  -5  -1   54.72    9.93   0
  -7   5  -2   94.19   10.44   0
   7   5   2  103.06   12.78   0
  -7   5  -2   81.85   10.03   0
  -7  -5  -2   80.94   11.66   0
   7  -5   2   76.56    5.75   0
  -7   5  -3   12.19    4.10   0
  -7   5  -3   15.47    4.64   0
   7   5   3   17.99    6.38   0
  -7  -5  -3   13.83    5.71   0
  -7   5  -4    6.02    3.41   0
  -7   5  -4    8.62    3.85   0
   7   5   4   17.93    6.11   0
  -7  -5  -4   10.35    5.74   0
  -7   5  -5   22.40    5.12   0
   7   5   5    9.33    5.34   0
  -7   5  -5   27.88    5.27   0
  -7  -5  -5   23.70    7.37   0
  -7   5  -6    0.26    2.12   0
   7   5   6    2.61    3.86   0
  -7   5  -6    1.75    2.64   0
  -7  -5  -6   12.50    6.51   0
   7   5   7   -2.66    2.82   0
  -7   5  -7    1.34    2.38   0
  -7   5  -7    0.66    2.38   0
  -7  -5  -7    1.65    3.73   0
  -7   5  -8   10.91    3.43   0
   7   5   8    9.88    5.05   0
  -7  -5  -8    5.83    5.99   0
   7   5   9   12.15    5.39   0
  -7   5  -9   24.67    4.43   0
  -7  -5  -9   29.83    8.84   0
  -7   5 -10    0.71    2.08   0
  -7  -5 -10    3.73    4.78   0
  -7  -5 -11   22.61    8.56   0
  -7  -5 -12   41.01   10.80   0
  -7  -5 -13    4.20    6.42   0
   7   6 -14   -2.14    4.48   0
   7  -6 -14   -1.59    5.72   0
   7   6 -13   -0.86    3.66   0
  -7   6  13    6.59    6.41   0
   7  -6 -13    2.71    6.05   0
  -7   6  12   24.15    9.73   0
   7   6 -12    7.94    5.20   0
   7  -6 -12    9.41    7.16   0
   7   6 -11    0.00    4.05   0
  -7   6  11   -2.08    4.84   0
   7  -6 -11   -3.81    4.22   0
  -7   6  10    2.57    5.52   0
   7   6 -10    3.33    4.76   0
   7  -6 -10    1.87    4.71   0
  -7   6   9    4.25    5.85   0
   7   6  -9    3.97    4.14   0
   7  -6  -9    7.11    6.33   0
  -7   6   8   15.83    7.60   0
   7   6  -8   18.80    6.57   0
   7  -6  -8   19.00    7.54   0
  -7   6   7    1.59    4.92   0
   7   6  -7   -2.40    3.22   0
   7  -6  -7   -3.56    3.53   0
  -7  -6   7    2.18    2.66   0
   7   6  -6    1.17    4.04   0
  -7   6   6   16.79    6.83   0
  -7  -6   6   10.33    4.29   0
   7  -6  -6    3.13    4.26   0
   7   6  -5   37.95    8.35   0
  -7   6   5   36.76    9.01   0
  -7  -6   5   42.92    7.46   0
   7  -6  -5   10.83    5.50   0
   7   6  -4  152.58   13.97   0
  -7   6   4  141.56   16.78   0
   7  -6  -4  168.63   14.58   0
  -7  -6   4  172.53   13.24   0
   7   6  -3  139.19   15.49   0
  -7   6   3   81.44   12.20   0
   7  -6  -3  138.95   15.24   0
  -7  -6   3  133.79   14.39   0
  -7   6   2    3.15    4.22   0
   7   6  -2    9.75    4.83   0
   7  -6  -2    0.76    3.52   0
  -7  -6   2    7.60    4.40   0
  -7   6   1  111.13   13.57   0
   7   6  -1  115.40   14.50   0
  -7  -6   1  134.50   15.02   0
   7  -6  -1  115.76   10.43   0
  -7   6   0    0.50    3.38   0
   7   6   0   -2.40    3.39   0
  -7  -6   0   -1.20    3.24   0
   7  -6   0    3.74    3.33   0
  -7   6  -1   11.33    4.94   0
   7   6   1    7.40    4.79   0
   7  -6   1   11.51    3.66   0
  -7  -6  -1    7.03    5.26   0
   7   6   2   13.46    5.69   0
  -7   6  -2   14.21    5.42   0
   7  -6   2   22.28    3.89   0
  -7  -6  -2   15.83    6.50   0
   7   6   3   52.57   10.34   0
  -7   6  -3   35.71    7.26   0
  -7   6  -3   38.92    7.26   0
  -7  -6  -3   46.61    9.74   0
   7   6   4   15.01    6.18   0
  -7   6  -4   11.88    4.67   0
  -7   6  -4   24.04    5.85   0
  -7  -6  -4   19.41    6.94   0
  -7   6  -5   85.96    9.60   0
   7   6   5   73.53   12.26   0
  -7   6  -5   93.85   10.42   0
  -7  -6  -5   78.56   12.77   0
   7   6   6    1.00    3.79   0
  -7   6  -6    4.83    3.36   0
  -7  -6  -6    1.94    4.93   0
  -7   6  -7    6.68    3.26   0
   7   6   7    2.69    4.49   0
  -7  -6  -7    4.37    5.44   0
  -7   6  -8    0.71    2.54   0
   7   6   8   -0.03    4.31   0
  -7  -6  -8   -3.60    2.56   0
  -7   6  -9   14.03    3.86   0
   7   6   9   10.52    5.79   0
  -7  -6  -9    4.54    5.06   0
  -7   6 -10    4.28    2.92   0
  -7  -6 -10   -4.51    4.94   0
  -7  -6 -11    2.93    6.08   0
  -7  -6 -12    5.97    7.21   0
  -7   7  13    5.38    7.11   0
   7   7 -13    4.98    5.55   0
   7  -7 -13    8.30    7.74   0
   7   7 -12    1.06    4.28   0
  -7   7  12    1.08    6.82   0
   7  -7 -12    1.92    5.52   0
   7   7 -11   -1.47    4.35   0
  -7   7  11    3.91    5.88   0
   7  -7 -11   -4.00    3.97   0
   7   7 -10   -4.07    4.07   0
  -7   7  10   -1.12    5.78   0
   7  -7 -10    5.89    6.42   0
  -7   7   9    3.39    5.47   0
   7   7  -9   19.86    6.80   0
   7  -7  -9   21.04    8.40   0
  -7   7   8    5.81    6.71   0
   7   7  -8   18.26    7.09   0
   7  -7  -8    4.56    5.72   0
  -7   7   7    1.09    4.96   0
   7   7  -7   12.07    6.42   0
   7  -7  -7    3.18    4.96   0
  -7   7   6    7.43    5.56   0
   7   7  -6    8.66    5.22   0
   7  -7  -6   -5.57    3.67   0
  -7  -7   6    5.41    3.70   0
   7   7  -5   -2.28    4.06   0
  -7   7   5    5.53    5.03   0
   7  -7  -5    0.62    4.59   0
  -7  -7   5   11.82    4.61   0
   7   7  -4   84.42   13.08   0
  -7   7   4   76.93   13.14   0
   7  -7  -4   81.73   12.39   0
  -7  -7   4   96.41   12.08   0
   7   7  -3   52.87   10.49   0
  -7   7   3   53.14   10.88   0
   7  -7  -3   61.72   10.65   0
  -7  -7   3   93.92   12.55   0
   7   7  -2   86.65   13.54   0
  -7   7   2   61.83   11.27   0
  -7  -7   2   57.11   10.27   0
   7  -7  -2  106.85   13.59   0
  -7   7   1   32.28    8.50   0
   7   7  -1   48.31   10.32   0
   7  -7  -1   21.59    6.37   0
  -7  -7   1   49.64   10.22   0
   7   7   0   35.95    9.08   0
  -7   7   0   21.55    7.12   0
   7  -7   0   18.00    5.16   0
  -7  -7   0   46.12   10.13   0
   7   7   1   57.47   11.11   0
  -7   7  -1   49.79    9.65   0
  -7  -7  -1   34.07    9.28   0
   7  -7   1   65.82    8.10   0
   7   7   2   67.55   12.10   0
  -7   7  -2   74.25   11.02   0
  -7  -7  -2   65.45   12.17   0
  -7   7  -3   18.31    5.74   0
   7   7   3   14.93    6.79   0
  -7  -7  -3   21.60    7.45   0
  -7   7  -4   -1.51    3.22   0
   7   7   4   -2.91    3.43   0
  -7  -7  -4   -3.95    4.28   0
  -7   7  -5    1.87    3.31   0
   7   7   5   -1.56    4.13   0
  -7  -7  -5   -1.57    4.41   0
   7   7   6    7.94    5.93   0
  -7   7  -6    1.49    3.09   0
  -7  -7  -6    3.96    5.48   0
   7   7   7    4.82    4.66   0
  -7   7  -7    8.06    3.96   0
  -7  -7  -7    8.12    6.17   0
   7   7   8    1.85    5.32   0
  -7   7  -8   13.17    4.70   0
  -7  -7  -8   13.06    8.25   0
   7   7   9   -1.76    4.12   0
  -7   7  -9   -0.11    3.11   0
  -7  -7  -9   -0.48    4.72   0
  -7  -7 -10   -4.17    5.00   0
  -7  -7 -11    7.47    6.54   0
  -7   8  12   -0.81    7.27   0
   7   8 -12    0.92    4.84   0
   7  -8 -12   -6.32    5.07   0
   7   8 -11   22.69    8.27   0
  -7   8  11   27.75   10.55   0
   7  -8 -11   38.58   12.20   0
   7   8 -10    5.05    5.87   0
  -7   8  10   -1.11    6.31   0
   7  -8 -10   -0.62    5.13   0
  -7   8   9   -0.40    6.40   0
   7   8  -9   11.07    6.83   0
   7  -8  -9    9.11    7.14   0
  -7   8   8    3.23    5.94   0
   7   8  -8   -5.40    4.31   0
   7  -8  -8   -0.25    5.61   0
   7   8  -7   40.80   10.35   0
  -7   8   7   31.18   10.83   0
   7  -8  -7   27.83    9.54   0
   7   8  -6    9.15    6.02   0
  -7   8   6   -1.78    4.84   0
   7  -8  -6    2.75    5.17   0
   7   8  -5   21.39    7.84   0
  -7   8   5   28.14    9.56   0
  -7  -8   5   28.49    6.87   0
   7  -8  -5   37.31    9.53   0
  -7   8   4   16.74    6.95   0
   7   8  -4   48.92   10.67   0
   7  -8  -4   25.07    8.19   0
  -7  -8   4   28.01    7.20   0
  -7   8   3   -1.70    3.52   0
   7   8  -3   -2.67    4.96   0
   7  -8  -3    5.31    4.79   0
  -7  -8   3    7.15    4.50   0
   7   8  -2   44.19   10.64   0
  -7   8   2   55.02   12.05   0
  -7  -8   2   30.59    8.00   0
   7  -8  -2   42.56    9.09   0
   7   8  -1   11.80    6.50   0
  -7   8   1   12.21    6.91   0
   7  -8  -1   11.63    5.29   0
  -7  -8   1   15.17    6.48   0
  -7   8   0   68.06   12.51   0
   7   8   0   65.48   12.86   0
   7  -8   0   43.49    8.09   0
  -7  -8   0   49.73   10.41   0
   7   8   1   -2.58    4.79   0
  -7   8  -1   -1.37    3.72   0
  -7  -8  -1   -4.68    3.30   0
  -7   8  -2   55.56   10.72   0
   7   8   2   64.22   12.84   0
  -7  -8  -2   59.57   11.98   0
  -7   8  -3    4.17    4.31   0
   7   8   3   20.64    8.42   0
  -7  -8  -3   -2.13    4.04   0
  -7   8  -4    0.67    4.17   0
   7   8   4    5.55    5.27   0
  -7  -8  -4    0.86    5.32   0
   7   8   5    4.68    6.03   0
  -7   8  -5   -1.69    3.72   0
  -7  -8  -5   12.41    7.92   0
   7   8   6    1.12    5.12   0
  -7   8  -6    0.82    4.33   0
  -7  -8  -6    7.23    5.75   0
  -7   8  -7    0.96    3.97   0
   7   8   7    3.47    5.02   0
  -7  -8  -7    7.26    6.81   0
  -7   8  -8    2.04    3.58   0
   7   8   8   -3.56    4.20   0
  -7  -8  -8    5.18    7.15   0
   7   8   9   -5.17    4.08   0
  -7   8  -9    9.44    4.49   0
  -7  -8  -9   -1.50    5.45   0
  -7  -8 -10    3.38    6.86   0
   7   9 -10    2.76    5.30   0
  -7   9  10    4.95    7.71   0
   7  -9 -10   -1.67    6.04   0
   7   9  -9   -0.94    5.67   0
  -7   9   9   11.91    8.85   0
   7  -9  -9    3.64    6.99   0
  -7   9   8    1.52    5.93   0
   7   9  -8   10.57    7.32   0
   7  -9  -8    0.89    5.38   0
  -7   9   7    5.86    6.68   0
   7   9  -7    1.67    6.40   0
   7  -9  -7    3.72    5.52   0
  -7   9   6   14.92    9.09   0
   7   9  -6    5.24    7.30   0
   7  -9  -6   20.17    8.88   0
  -7   9   5    2.71    6.47   0
   7   9  -5    0.43    5.05   0
   7  -9  -5   -1.27    5.06   0
   7   9  -4    7.75    6.96   0
  -7   9   4    3.35    5.86   0
   7  -9  -4    7.50    5.77   0
   7   9  -3   -2.13    5.64   0
  -7   9   3    5.88    5.87   0
  -7  -9   3   11.17    5.63   0
   7  -9  -3   13.13    6.14   0
  -7   9   2   87.06   14.86   0
   7   9  -2  175.96   22.12   0
  -7  -9   2  120.12   15.91   0
   7  -9  -2  126.61   15.41   0
  -7   9   1    7.75    5.94   0
   7   9  -1    7.00    6.21   0
  -7  -9   1   37.76    9.90   0
  -7   9   0   17.75    8.01   0
   7   9   0    4.86    5.52   0
  -7  -9   0    6.76    6.15   0
  -7   9  -1   29.99    8.84   0
   7   9   1   22.48    9.30   0
  -7  -9  -1   22.31    8.20   0
  -7   9  -2  102.79   15.11   0
   7   9   2  112.51   18.20   0
  -7  -9  -2  105.25   16.58   0
   7   9   3    5.78    7.61   0
  -7   9  -3   20.72    7.34   0
  -7  -9  -3   14.12    8.25   0
  -7   9  -4   19.69    7.54   0
   7   9   4   15.18    8.85   0
  -7  -9  -4   15.62    9.06   0
  -7   9  -5   11.21    6.04   0
   7   9   5    6.15    6.87   0
  -7  -9  -5    1.81    6.16   0
   7   9   6    9.50    7.34   0
  -7   9  -6    4.58    4.86   0
  -7  -9  -6    5.01    5.70   0
   7   9   7   -5.13    5.09   0
  -7   9  -7   -0.15    3.96   0
  -7  -9  -7   -1.97    4.69   0
   7   9   8    8.15    6.67   0
  -7   9  -8    2.41    4.66   0
  -7  -9  -8    9.35    7.96   0
   7  10  -8   10.93    7.96   0
  -7  10   8   -5.16    6.41   0
   7 -10  -8   -2.40    6.80   0
   7  10  -7   -2.80    6.00   0
  -7  10   7   -2.32    5.80   0
   7 -10  -7    1.89    5.95   0
  -7  10   6   10.27    8.81   0
   7  10  -6  -10.84    4.98   0
   7 -10  -6   15.58    8.13   0
  -7  10   5    3.37    8.08   0
   7  10  -5   21.58    9.81   0
   7 -10  -5    5.87    6.39   0
   7  10  -4   -4.29    5.92   0
  -7  10   4    4.95    6.87   0
   7 -10  -4    4.51    5.36   0
   7  10  -3   -4.06    6.69   0
  -7  10   3   15.39    7.80   0
   7  10  -2   -0.46    6.48   0
  -7  10   2    9.67    7.38   0
   7  10  -1   11.11    7.96   0
  -7  10   1    5.22    7.05   0
  -7 -10   1   -4.56    4.27   0
  -7  10   0  138.24   19.14   0
   7  10   0  132.48   20.60   0
  -7 -10   0  102.65   16.19   0
  -7  10  -1   -3.58    5.59   0
   7  10   1    6.13    6.79   0
  -7 -10  -1    6.71    6.57   0
  -7  10  -2   11.09    7.23   0
   7  10   2   14.51    8.36   0
  -7 -10  -2    3.00    6.18   0
   7  10   3   59.71   15.19   0
  -7  10  -3   25.54    8.52   0
  -7 -10  -3   20.78    9.70   0
   7  10   4    4.40    8.36   0
  -7  10  -4    2.22    5.31   0
  -7 -10  -4   11.94    8.01   0
  -7  10  -5   18.12    7.36   0
   7  10   5   19.61    9.79   0
  -7 -10  -5   16.09    8.66   0
  -7 -10  -6    1.61    6.18   0
   7  11  -3  -11.74    6.15   0
  -7  11   3    7.53    7.37   0
  -7  11   2   -0.63    6.82   0
   7  11  -2   16.83   10.79   0
   7  11  -1   -4.37    6.25   0
  -7  11   1    4.96    6.71   0
   7  11   0   18.74   10.15   0
  -7  11   0   38.84   11.67   0
   7  11   1   16.64   10.73   0
  -7  11  -1    0.87    6.68   0
  -7 -11  -1    4.40    6.25   0
   8   0 -17    0.40    5.97   0
   8   0 -16    9.06    6.11   0
   8   0 -15    1.62    4.25   0
   8   0 -14   -1.62    4.10   0
   8   0 -13   -0.61    3.61   0
   8   0 -12    7.13    4.53   0
  -8   0  12    9.80    3.97   0
   8   0 -11    0.24    3.87   0
  -8   0  11    1.95    2.95   0
  -8   0  10  194.04   13.56   0
   8   0 -10  176.73   14.51   0
  -8   0   9    2.57    3.50   0
   8   0  -9   -2.30    3.18   0
  -8   0   8   12.63    4.37   0
   8   0  -8    9.68    4.41   0
  -8   0   7    1.06    3.12   0
   8   0  -7   -1.04    2.82   0
  -8   0   6   14.07    4.94   0
   8   0  -6   20.60    5.48   0
   8   0  -5    0.16    2.60   0
  -8   0   5    1.01    3.06   0
   8   0  -4   14.79    4.72   0
  -8   0   4    1.06    3.19   0
   8   0  -3    7.32    3.90   0
  -8   0   3    1.37    2.93   0
   8   0  -2  424.64   21.05   0
  -8   0   2  444.62   21.71   0
  -8   0   1    2.70    3.10   0
   8   0  -1    3.87    3.04   0
  -8   0   1    1.95    2.86   0
  -8   0   0  431.92   20.40   0
  -8   0   0  375.81   19.77   0
   8   0   0  413.76   19.63   0
  -8   0  -1    0.84    2.77   0
  -8   0  -1    0.68    2.88   0
   8   0   1    6.78    3.34   0
  -8   0  -2    7.09    3.59   0
  -8   0  -2    6.88    3.27   0
   8   0   2    6.44    2.86   0
   8   0   3    2.57    2.39   0
  -8   0  -3    4.20    2.91   0
  -8   0  -3    0.88    2.62   0
   8   0   4  151.08    9.07   0
  -8   0  -4  140.36   10.56   0
  -8   0  -4  146.54   10.33   0
  -8   0  -5   -0.80    2.56   0
   8   0   5   -0.13    1.61   0
  -8   0  -5    1.90    2.47   0
   8   0   5    1.37    1.66   0
  -8   0  -6   -1.57    2.21   0
   8   0   6    0.69    1.11   0
   8   0   6    0.64    1.17   0
  -8   0  -6    2.95    2.96   0
  -8   0  -7   -0.29    2.69   0
  -8   0  -7    0.55    2.41   0
  -8   0  -8   28.76    6.29   0
  -8   0  -8   43.79    7.61   0
  -8   0  -9    1.29    2.98   0
  -8   0  -9    2.86    3.56   0
  -8   0  -9    2.37    3.02   0
  -8   0 -10    7.26    4.05   0
  -8   0 -11    1.58    3.54   0
  -8   0 -12    9.72    4.75   0
  -8   0 -13    0.12    3.95   0
  -8   0 -14    5.67    4.80   0
   8   1 -17    5.87    5.76   0
   8  -1 -17    4.34    6.11   0
   8   1 -16   -4.04    3.42   0
   8  -1 -16   14.13    6.88   0
   8   1 -15    1.44    4.29   0
   8  -1 -15    0.38    4.72   0
   8   1 -14    5.93    4.84   0
   8  -1 -14   -1.05    3.56   0
   8   1 -13   -2.52    3.61   0
   8  -1 -13    1.57    4.63   0
   8   1 -12    0.83    3.73   0
  -8   1  12    5.03    3.87   0
   8  -1 -12   -0.93    4.07   0
  -8   1  11   25.54    6.63   0
   8   1 -11   24.94    6.95   0
  -8  -1  11   24.62    5.60   0
   8  -1 -11   13.29    6.38   0
   8   1 -10   -4.43    2.53   0
  -8   1  10    3.16    3.63   0
  -8  -1  10   -1.19    2.54   0
   8  -1 -10    2.08    3.92   0
  -8   1   9   37.29    7.34   0
   8   1  -9   28.53    6.60   0
  -8  -1   9   28.07    6.27   0
   8  -1  -9   33.58    7.79   0
   8   1  -8   54.85    8.74   0
  -8   1   8   43.06    7.76   0
  -8  -1   8   44.03    7.46   0
   8  -1  -8   44.59    8.21   0
   8   1  -7   -0.93    2.77   0
  -8   1   7    4.70    3.69   0
   8  -1  -7   -2.69    2.44   0
  -8  -1   7    8.27    3.95   0
  -8   1   6   40.28    7.43   0
   8   1  -6   63.94    9.04   0
   8  -1  -6   58.01    8.94   0
  -8  -1   6   59.15    8.47   0
   8   1  -5  426.93   22.78   0
  -8   1   5  467.91   23.54   0
  -8  -1   5  486.81   23.29   0
   8  -1  -5  464.54   23.39   0
  -8   1   4  399.52   21.07   0
   8   1  -4  392.13   20.70   0
  -8  -1   4  396.80   20.71   0
   8  -1  -4  431.92   21.15   0
   8   1  -3  701.08   30.00   0
  -8   1   3  674.99   30.13   0
   8  -1  -3  668.85   29.61   0
  -8  -1   3  659.02   29.82   0
   8   1  -2   44.41    7.23   0
  -8   1   2   33.73    6.65   0
  -8  -1   2   45.26    7.29   0
   8  -1  -2   39.70    6.76   0
   8   1  -1  208.65   13.36   0
  -8   1   1  230.61   13.64   0
  -8   1   1  221.58   13.78   0
   8  -1  -1  207.88   12.91   0
  -8  -1   1  203.82   13.55   0
  -8   1   0   84.91    9.43   0
  -8   1   0   69.77    8.62   0
   8   1   0   59.31    7.82   0
   8  -1   0   79.72    7.10   0
  -8  -1   0   62.88    8.61   0
  -8   1  -1  351.17   18.16   0
   8   1   1  370.69   18.39   0
  -8   1  -1  356.89   17.96   0
   8  -1   1  331.68   16.98   0
  -8  -1  -1  374.46   19.17   0
  -8  -1  -1  381.41   18.99   0
  -8   1  -2    9.33    3.44   0
  -8   1  -2    5.89    3.49   0
   8   1   2   15.97    4.41   0
  -8  -1  -2   11.68    4.33   0
   8  -1   2    9.99    2.92   0
  -8  -1  -2   17.52    4.91   0
  -8   1  -3   23.16    5.19   0
   8   1   3   17.57    4.39   0
  -8   1  -3   15.84    4.23   0
  -8  -1  -3    9.81    4.35   0
  -8  -1  -3   11.98    4.13   0
   8  -1   3   14.48    3.25   0
   8  -1   3   14.56    3.13   0
   8   1   4    3.63    2.57   0
  -8   1  -4    0.51    2.08   0
  -8   1  -4    0.16    2.14   0
   8  -1   4    0.89    1.54   0
  -8  -1  -4   -3.51    2.13   0
  -8  -1  -4    0.59    2.49   0
   8  -1   4    2.83    1.54   0
  -8   1  -5   24.17    5.09   0
   8   1   5   39.11    5.76   0
  -8   1  -5   37.21    5.96   0
  -8  -1  -5   27.48    6.40   0
  -8  -1  -5   27.76    5.96   0
  -8   1  -6   31.47    5.53   0
   8   1   6   27.75    4.75   0
  -8   1  -6   15.99    4.41   0
  -8  -1  -6   18.28    5.09   0
  -8  -1  -6   23.80    5.77   0
  -8   1  -7   99.29    8.48   0
   8   1   7   93.28    6.59   0
  -8   1  -7   96.16    8.14   0
  -8  -1  -7  105.83   12.09   0
  -8  -1  -7  111.28   12.04   0
  -8  -1  -7  100.84   11.64   0
  -8   1  -8   28.92    5.60   0
   8   1   8   13.45    2.13   0
  -8   1  -8   18.01    4.88   0
   8   1   8   14.18    2.12   0
  -8  -1  -8   16.75    5.86   0
  -8  -1  -8   23.41    6.85   0
  -8  -1  -8   18.62    5.99   0
  -8   1  -9   86.32   11.29   0
  -8   1  -9   53.59    8.08   0
  -8  -1  -9   66.45    9.87   0
  -8   1 -10    0.27    2.88   0
  -8  -1 -10    0.84    3.50   0
  -8   1 -11   14.76    5.03   0
  -8  -1 -11   12.58    5.54   0
  -8   1 -12    0.52    3.35   0
  -8  -1 -12    1.69    4.42   0
  -8   1 -13   14.29    5.28   0
  -8  -1 -13    8.73    5.44   0
  -8   1 -14    5.27    4.43   0
  -8  -1 -14    3.13    5.07   0
   8   2 -16   12.51    6.50   0
   8  -2 -16    3.64    6.17   0
   8   2 -15   -2.24    3.27   0
   8  -2 -15   -1.48    4.14   0
   8   2 -14    3.49    4.72   0
   8  -2 -14   -0.34    4.23   0
  -8   2  13    2.67    4.65   0
   8   2 -13    3.81    4.82   0
   8  -2 -13    1.26    4.93   0
  -8   2  12    9.79    5.36   0
   8   2 -12   -0.86    3.65   0
   8  -2 -12    6.64    5.28   0
  -8   2  11    5.29    4.06   0
   8   2 -11    6.72    4.69   0
   8  -2 -11   -1.66    3.46   0
  -8  -2  11    5.27    2.97   0
   8   2 -10   86.77   11.95   0
  -8   2  10   83.48   11.96   0
  -8  -2  10   65.92    8.34   0
   8  -2 -10   55.20   10.43   0
  -8   2   9   -2.07    2.87   0
   8   2  -9   -2.23    2.70   0
  -8  -2   9    0.37    2.29   0
   8  -2  -9    1.74    3.83   0
  -8   2   8   23.62    6.68   0
   8   2  -8   26.86    6.63   0
   8  -2  -8   27.93    7.36   0
  -8  -2   8   36.77    6.68   0
  -8   2   7   32.67    7.21   0
   8   2  -7   29.48    6.35   0
  -8  -2   7   23.68    5.65   0
   8  -2  -7   20.09    6.04   0
   8   2  -6   10.66    4.45   0
  -8   2   6   19.30    5.51   0
  -8  -2   6   32.69    6.40   0
   8  -2  -6   24.51    6.53   0
   8   2  -5   55.41    8.23   0
  -8   2   5   44.13    8.11   0
  -8  -2   5   50.42    7.82   0
   8  -2  -5   42.24    7.94   0
   8   2  -4  377.18   20.29   0
   8  -2  -4  362.19   20.45   0
  -8  -2   4  392.58   20.28   0
   8   2  -3  275.63   16.36   0
  -8   2   3  248.88   15.91   0
  -8  -2   3  257.53   15.80   0
   8  -2  -3  278.03   16.36   0
   8   2  -2   70.92    9.18   0
  -8   2   2   89.01   10.30   0
  -8  -2   2   77.08   10.14   0
   8  -2  -2   86.69    9.87   0
   8   2  -1   34.84    6.40   0
  -8   2   1   37.67    6.33   0
  -8   2   1   40.29    7.18   0
   8  -2  -1   52.72    7.66   0
  -8  -2   1   39.83    7.66   0
   8   2   0  181.22   12.24   0
  -8   2   0  147.76   11.24   0
  -8   2   0  140.61   10.59   0
  -8  -2   0  171.76   12.50   0
   8  -2   0  176.19   11.06   0
  -8   2  -1   86.65    9.29   0
   8   2   1   74.05    9.31   0
  -8   2  -1   99.76   10.29   0
   8  -2   1   81.94    6.99   0
  -8  -2  -1   81.59   10.11   0
  -8   2  -2   31.83    5.98   0
  -8   2  -2   36.85    6.08   0
   8   2   2   27.74    5.87   0
   8  -2   2   34.33    4.74   0
  -8  -2  -2   36.86    7.13   0
   8  -2   2   36.32    4.94   0
  -8   2  -3    0.44    1.95   0
   8   2   3    1.82    2.71   0
  -8   2  -3    0.86    2.50   0
   8  -2   3    0.56    1.52   0
  -8  -2  -3    8.19    4.11   0
   8  -2   3    1.76    1.49   0
   8   2   4   54.04    8.07   0
  -8   2  -4   68.89    7.77   0
  -8   2  -4   62.42    7.79   0
  -8  -2  -4   51.22    8.56   0
  -8   2  -5    0.46    1.98   0
  -8   2  -5    0.80    2.49   0
   8   2   5    3.81    3.27   0
  -8  -2  -5    1.88    3.42   0
   8   2   6   -0.03    2.26   0
  -8   2  -6    3.71    2.77   0
  -8   2  -6    7.54    2.95   0
  -8  -2  -6    4.86    4.19   0
  -8   2  -7   13.64    4.03   0
   8   2   7   29.03    5.43   0
  -8   2  -7   19.23    4.29   0
  -8  -2  -7   27.11    6.77   0
  -8   2  -8  186.22   11.29   0
  -8   2  -8  198.76   11.86   0
   8   2   8  181.86   11.34   0
  -8  -2  -8  193.72   15.11   0
  -8   2  -9    0.92    2.25   0
  -8  -2  -9    2.47    4.10   0
  -8   2 -10    4.45    3.13   0
  -8  -2 -10   -2.33    2.79   0
  -8   2 -11    8.55    4.00   0
  -8  -2 -11   11.44    5.26   0
  -8   2 -12   -1.98    2.97   0
  -8  -2 -12    2.65    4.62   0
  -8   2 -13    0.64    3.32   0
  -8  -2 -13    6.11    5.18   0
  -8  -2 -14   -3.99    3.76   0
   8   3 -16    1.31    4.84   0
   8  -3 -16   -6.27    4.93   0
   8   3 -15   -0.80    4.35   0
   8  -3 -15    2.04    6.00   0
   8   3 -14   13.26    6.32   0
   8  -3 -14   11.61    7.47   0
  -8   3  13   -2.19    4.05   0
   8   3 -13    3.20    3.92   0
   8  -3 -13   -4.43    3.91   0
   8   3 -12   -0.49    3.52   0
  -8   3  12    1.75    4.24   0
   8  -3 -12    1.42    4.40   0
   8   3 -11   14.39    5.62   0
  -8   3  11   11.88    5.43   0
   8  -3 -11    6.25    5.03   0
  -8   3  10    2.82    4.32   0
   8   3 -10    7.49    4.45   0
   8  -3 -10   -4.25    3.00   0
  -8  -3  10    0.42    2.30   0
  -8   3   9   28.59    7.44   0
   8   3  -9   27.10    6.72   0
  -8  -3   9   40.61    6.42   0
   8  -3  -9   27.60    7.60   0
   8   3  -8    4.27    3.87   0
  -8   3   8    2.13    3.66   0
  -8  -3   8    5.09    3.37   0
   8  -3  -8    2.37    3.68   0
  -8   3   7   18.00    5.90   0
   8   3  -7   31.48    7.24   0
   8  -3  -7   38.68    8.29   0
  -8  -3   7   35.26    6.64   0
   8   3  -6    6.38    4.20   0
  -8   3   6    2.02    3.62   0
  -8  -3   6    2.73    3.14   0
   8  -3  -6    0.32    3.05   0
   8   3  -5   20.33    5.83   0
  -8   3   5   12.57    4.80   0
  -8  -3   5   17.03    4.97   0
   8  -3  -5   35.03    7.63   0
   8   3  -4   48.02    7.97   0
  -8   3   4   29.48    6.88   0
  -8  -3   4   52.28    8.40   0
   8  -3  -4   39.43    7.69   0
  -8   3   3    0.51    3.06   0
   8   3  -3    3.36    3.18   0
  -8  -3   3    5.39    3.80   0
   8  -3  -3   -1.59    2.21   0
  -8   3   2    1.64    2.86   0
   8   3  -2    1.21    2.74   0
  -8  -3   2    1.53    3.15   0
   8  -3  -2    1.30    2.94   0
   8   3  -1  136.94   11.39   0
  -8   3   1  117.03   10.28   0
  -8  -3   1  134.17   11.40   0
   8  -3  -1  135.72   10.17   0
   8   3   0   74.89    9.77   0
  -8   3   0   41.26    7.02   0
  -8   3   0   62.65    8.23   0
  -8  -3   0   67.12   10.17   0
   8  -3   0   61.06    7.70   0
  -8   3  -1   47.69    7.35   0
   8   3   1   46.06    8.13   0
  -8   3  -1   45.99    7.38   0
   8  -3   1   50.31    6.58   0
  -8  -3  -1   47.22    8.64   0
  -8   3  -2   14.82    4.50   0
   8   3   2   20.79    5.89   0
  -8   3  -2   16.19    4.31   0
  -8  -3  -2   12.18    4.77   0
   8  -3   2   18.20    3.57   0
   8  -3   2   13.95    3.18   0
   8   3   3   63.25    9.24   0
  -8   3  -3   70.48    8.21   0
  -8   3  -3   65.36    8.07   0
  -8  -3  -3   69.26   10.29   0
   8  -3   3   75.23    4.24   0
   8  -3   3   67.43    4.04   0
  -8   3  -4    4.18    2.77   0
  -8   3  -4   -0.02    1.95   0
   8   3   4   -0.38    2.45   0
  -8  -3  -4    1.77    3.69   0
   8   3   5   -0.10    2.51   0
  -8   3  -5    2.39    2.32   0
  -8   3  -5   -0.58    1.93   0
  -8  -3  -5    1.73    3.97   0
  -8   3  -6   -1.56    1.86   0
  -8   3  -6    0.74    2.24   0
   8   3   6    2.00    3.30   0
  -8  -3  -6   -2.78    3.12   0
   8   3   7   31.86    6.47   0
  -8   3  -7   25.84    4.93   0
  -8   3  -7   18.17    3.88   0
  -8  -3  -7   34.78    8.61   0
  -8   3  -8    3.14    2.33   0
  -8   3  -8    2.63    2.49   0
   8   3   8    0.10    2.77   0
  -8  -3  -8   -2.63    3.81   0
  -8   3  -9   59.61    7.11   0
  -8  -3  -9   51.63   10.50   0
  -8   3 -10   17.40    4.06   0
  -8  -3 -10   23.92    7.47   0
  -8   3 -11   -0.22    2.32   0
  -8  -3 -11   -5.57    3.19   0
  -8   3 -12    1.21    2.87   0
  -8  -3 -12    0.01    4.64   0
  -8  -3 -13   24.34    8.17   0
   8   4 -16    5.26    5.37   0
   8  -4 -16   -3.35    4.67   0
   8   4 -15    6.22    5.36   0
   8  -4 -15    2.01    6.13   0
   8   4 -14   14.03    6.30   0
   8  -4 -14   10.50    7.10   0
  -8   4  13    4.32    5.33   0
   8   4 -13    1.94    4.34   0
   8  -4 -13    1.54    4.35   0
   8   4 -12    2.40    4.47   0
  -8   4  12    2.04    5.01   0
   8  -4 -12    2.27    5.00   0
  -8   4  11    5.47    5.75   0
   8   4 -11   -0.72    3.88   0
   8  -4 -11   -3.20    3.25   0
  -8   4  10   29.77    8.44   0
   8   4 -10   39.77    8.19   0
   8  -4 -10   28.57    8.35   0
  -8   4   9   11.19    5.81   0
   8   4  -9    7.44    5.22   0
   8  -4  -9    8.15    5.14   0
  -8  -4   9   11.98    3.89   0
  -8   4   8    2.91    3.86   0
   8   4  -8    4.48    4.47   0
   8  -4  -8    5.70    4.35   0
  -8  -4   8    4.50    2.88   0
   8   4  -7   10.70    4.90   0
  -8   4   7   18.06    6.41   0
   8  -4  -7   16.15    5.82   0
  -8  -4   7   13.79    4.73   0
   8   4  -6  198.42   14.92   0
  -8   4   6  208.84   16.38   0
   8  -4  -6  202.29   15.67   0
  -8  -4   6  190.83   13.51   0
  -8   4   5   66.88   10.49   0
   8   4  -5   61.55    9.66   0
  -8  -4   5   57.04    8.86   0
   8  -4  -5   62.59    9.85   0
   8   4  -4   38.93    7.41   0
  -8   4   4   18.95    5.53   0
   8  -4  -4   29.88    6.80   0
  -8  -4   4   31.86    6.42   0
   8   4  -3  128.81   13.73   0
  -8   4   3  104.06   12.76   0
  -8  -4   3   88.40   11.33   0
   8  -4  -3   99.99   12.22   0
  -8   4   2   17.94    5.64   0
   8   4  -2   12.15    4.83   0
  -8  -4   2   17.08    5.70   0
   8  -4  -2   13.47    4.84   0
   8   4  -1   49.69    8.69   0
  -8   4   1   58.47    9.31   0
   8  -4  -1   67.59    8.82   0
  -8  -4   1   68.96   10.22   0
  -8   4   0   88.67   10.89   0
   8   4   0   84.83   11.23   0
  -8  -4   0   79.21   11.45   0
   8  -4   0   88.35    8.04   0
  -8   4  -1    4.61    3.39   0
  -8   4  -1    0.00    2.36   0
   8   4   1    0.78    3.09   0
   8  -4   1    0.29    1.91   0
  -8  -4  -1    4.04    3.74   0
   8   4   2   11.52    4.79   0
  -8   4  -2    5.04    3.40   0
  -8   4  -2    2.15    2.58   0
   8  -4   2   12.27    3.12   0
  -8  -4  -2    0.31    3.16   0
  -8   4  -3   30.47    5.94   0
  -8   4  -3   37.77    6.46   0
   8   4   3   35.89    7.47   0
  -8  -4  -3   20.13    6.25   0
  -8   4  -4   20.55    4.75   0
   8   4   4   20.05    6.12   0
  -8   4  -4   25.55    5.35   0
  -8  -4  -4    8.89    4.86   0
  -8   4  -5   19.17    4.40   0
   8   4   5   26.71    6.56   0
  -8   4  -5   27.38    5.33   0
  -8  -4  -5   10.83    5.28   0
  -8   4  -6    5.13    2.81   0
   8   4   6    0.83    3.81   0
  -8   4  -6    1.49    2.89   0
  -8  -4  -6    5.08    4.79   0
  -8   4  -7   46.98    6.11   0
   8   4   7   32.76    7.77   0
  -8   4  -7   45.60    6.26   0
  -8  -4  -7   23.58    7.44   0
  -8   4  -8    3.84    2.78   0
   8   4   8    1.09    3.29   0
  -8  -4  -8    8.56    5.79   0
  -8   4  -9    5.13    3.06   0
   8   4   9    0.31    3.25   0
  -8  -4  -9   -4.67    3.71   0
  -8   4 -10   26.25    4.62   0
  -8  -4 -10   19.44    7.51   0
  -8   4 -11    4.79    2.78   0
  -8  -4 -11    3.16    5.55   0
  -8  -4 -12    0.45    5.15   0
  -8  -4 -13    4.28    6.09   0
   8   5 -15    1.98    4.75   0
   8  -5 -15    3.90    6.00   0
   8   5 -14    1.93    4.42   0
   8  -5 -14    7.16    6.85   0
   8   5 -13   -2.07    3.73   0
  -8   5  13    4.25    6.47   0
   8  -5 -13    0.25    4.90   0
   8   5 -12   18.15    6.43   0
  -8   5  12   15.34    7.83   0
   8  -5 -12    0.20    4.91   0
  -8   5  11   20.32    8.50   0
   8   5 -11   16.21    6.69   0
   8  -5 -11    7.09    5.42   0
  -8   5  10   -0.90    5.20   0
   8   5 -10    6.43    5.53   0
   8  -5 -10    1.13    4.60   0
   8   5  -9   57.61   10.09   0
  -8   5   9   65.07   12.32   0
   8  -5  -9   61.36   12.58   0
   8   5  -8    4.44    4.70   0
  -8   5   8    3.83    5.35   0
  -8  -5   8   -1.89    2.15   0
   8  -5  -8   -2.27    3.41   0
   8   5  -7   16.83    5.83   0
  -8   5   7   17.31    6.80   0
   8  -5  -7   24.83    7.64   0
  -8  -5   7   18.87    5.12   0
  -8   5   6  137.65   16.75   0
   8   5  -6  152.56   13.69   0
  -8  -5   6  170.70   12.56   0
   8  -5  -6  141.99   16.78   0
   8   5  -5   21.94    6.63   0
  -8   5   5   36.00    8.99   0
   8  -5  -5   11.85    5.69   0
  -8  -5   5   12.44    4.77   0
  -8   5   4   61.63   10.43   0
   8   5  -4   78.50   10.99   0
   8  -5  -4   69.33   10.85   0
  -8  -5   4   85.52   10.96   0
  -8   5   3    4.11    3.51   0
   8   5  -3   10.17    4.49   0
  -8  -5   3   14.17    5.45   0
   8  -5  -3   10.40    5.11   0
   8   5  -2   97.66   12.70   0
  -8   5   2  120.60   14.00   0
  -8  -5   2  122.92   13.99   0
   8  -5  -2  123.98   13.49   0
   8   5  -1  312.81   19.89   0
  -8   5   1  298.33   19.16   0
  -8  -5   1  289.11   19.24   0
   8  -5  -1  300.27   17.54   0
   8   5   0   -1.22    3.25   0
  -8   5   0   -0.16    2.91   0
   8  -5   0   -2.67    1.91   0
  -8  -5   0    2.78    3.59   0
  -8   5  -1   34.44    7.53   0
   8   5   1   38.81    8.67   0
   8  -5   1   49.24    6.68   0
  -8  -5  -1   58.22   10.07   0
   8   5   2   29.41    8.11   0
  -8   5  -2   22.39    5.88   0
  -8   5  -2   20.92    5.47   0
  -8  -5  -2   21.03    6.56   0
   8  -5   2   27.42    4.33   0
   8   5   3    7.01    4.89   0
  -8   5  -3    5.02    3.48   0
  -8   5  -3    5.22    2.98   0
  -8  -5  -3    3.36    4.15   0
  -8   5  -4   17.27    4.76   0
   8   5   4   18.37    5.99   0
  -8   5  -4   16.75    5.13   0
  -8  -5  -4    4.67    4.37   0
  -8   5  -5   53.92    7.29   0
   8   5   5   57.84   10.69   0
  -8   5  -5   57.84    7.99   0
  -8  -5  -5   50.45   10.27   0
  -8   5  -6   20.11    4.42   0
  -8   5  -6   11.30    3.91   0
   8   5   6    5.03    4.37   0
  -8  -5  -6   14.18    6.57   0
  -8   5  -7    2.30    2.99   0
   8   5   7    1.48    3.99   0
  -8  -5  -7   -1.36    3.60   0
  -8   5  -8   12.31    3.80   0
   8   5   8    3.23    4.04   0
  -8  -5  -8    1.92    4.57   0
   8   5   9    0.40    3.51   0
  -8   5  -9    1.03    2.59   0
  -8  -5  -9    1.90    4.48   0
  -8   5 -10   30.76    4.91   0
  -8  -5 -10   16.90    8.07   0
  -8  -5 -11    7.97    6.61   0
  -8  -5 -12   -1.18    5.41   0
   8   6 -14    8.19    6.68   0
   8  -6 -14    2.39    7.62   0
   8   6 -13   13.21    6.24   0
  -8   6  13   28.30    9.57   0
   8  -6 -13   13.27    9.12   0
  -8   6  12   10.16    7.39   0
   8   6 -12   16.52    7.38   0
   8  -6 -12   -0.78    4.97   0
  -8   6  11    1.94    5.76   0
   8   6 -11    2.30    5.14   0
   8  -6 -11    5.71    6.35   0
  -8   6  10    9.61    6.65   0
   8   6 -10   17.47    6.60   0
   8  -6 -10    4.24    5.71   0
   8   6  -9    6.01    5.30   0
  -8   6   9   12.40    7.41   0
   8  -6  -9   -3.74    4.07   0
  -8   6   8    0.07    5.36   0
   8   6  -8    2.71    4.20   0
   8  -6  -8    2.13    5.02   0
   8   6  -7   33.86    8.30   0
  -8   6   7   19.56    7.33   0
   8  -6  -7   27.87    8.29   0
  -8  -6   7   25.26    6.08   0
  -8   6   6   13.74    6.47   0
   8   6  -6   10.93    5.37   0
  -8  -6   6    8.65    4.24   0
   8  -6  -6   10.88    6.07   0
   8   6  -5    0.32    3.66   0
  -8   6   5    0.44    4.28   0
   8  -6  -5    1.23    4.05   0
  -8  -6   5    2.84    3.35   0
   8   6  -4  210.19   16.89   0
  -8   6   4  229.57   18.51   0
  -8  -6   4  203.90   15.62   0
   8  -6  -4  233.24   17.44   0
   8   6  -3    1.66    4.14   0
  -8   6   3    7.51    5.13   0
  -8  -6   3   -0.21    3.35   0
   8  -6  -3    1.38    3.27   0
  -8   6   2   26.33    7.33   0
   8   6  -2   24.55    7.18   0
   8  -6  -2   27.96    7.09   0
  -8  -6   2   32.15    7.68   0
   8   6  -1   -1.71    3.10   0
  -8   6   1   -3.58    3.35   0
   8  -6  -1    2.53    3.19   0
  -8  -6   1    0.24    3.34   0
   8   6   0   39.48    9.20   0
  -8   6   0   27.67    7.03   0
  -8  -6   0   59.75   10.82   0
   8  -6   0   42.01    7.10   0
   8   6   1   -1.63    3.11   0
  -8   6  -1   -0.61    3.28   0
  -8  -6  -1    8.20    5.11   0
   8  -6   1    5.62    3.13   0
  -8   6  -2    1.84    3.60   0
   8   6   2   -0.06    3.77   0
  -8  -6  -2    2.81    4.56   0
   8  -6   2    1.31    1.95   0
   8   6   3   20.74    7.34   0
  -8   6  -3   11.68    4.76   0
  -8   6  -3   18.99    5.66   0
  -8  -6  -3   14.70    6.91   0
  -8   6  -4   -2.10    2.63   0
   8   6   4    7.06    4.88   0
  -8   6  -4    1.67    3.03   0
  -8  -6  -4    1.13    4.46   0
  -8   6  -5    2.86    3.18   0
   8   6   5    6.42    5.59   0
  -8  -6  -5   -1.75    3.94   0
   8   6   6    6.61    5.20   0
  -8   6  -6    4.88    3.51   0
  -8  -6  -6    4.55    5.21   0
   8   6   7   26.56    7.45   0
  -8   6  -7   31.22    6.16   0
  -8  -6  -7   13.40    6.84   0
  -8   6  -8   30.23    5.64   0
   8   6   8   20.68    7.23   0
  -8  -6  -8   21.47    9.38   0
   8   6   9   69.21   11.80   0
  -8   6  -9   82.71    8.68   0
  -8  -6  -9   87.54   15.03   0
  -8   6 -10   55.51    6.88   0
  -8  -6 -10   47.10   11.91   0
  -8  -6 -11   28.00   10.26   0
   8   7 -13   21.43    8.50   0
  -8   7  13   -2.19    6.45   0
   8  -7 -13   -3.55    5.30   0
  -8   7  12   11.23    8.25   0
   8   7 -12   -1.11    5.29   0
   8  -7 -12    2.78    6.43   0
   8   7 -11   11.31    6.14   0
  -8   7  11    7.69    7.14   0
   8  -7 -11   10.47    7.50   0
  -8   7  10   -1.70    5.89   0
   8   7 -10   -3.95    4.20   0
   8  -7 -10    0.74    5.56   0
  -8   7   9    0.89    4.82   0
   8   7  -9    0.50    4.37   0
   8  -7  -9   -1.32    5.16   0
   8   7  -8    9.34    5.61   0
  -8   7   8   -1.32    5.28   0
   8  -7  -8    5.63    5.74   0
  -8   7   7   27.81    9.74   0
   8   7  -7   23.72    7.95   0
   8  -7  -7   17.72    7.46   0
  -8   7   6    0.60    5.17   0
   8   7  -6   -0.16    4.66   0
  -8  -7   6    4.34    4.12   0
   8  -7  -6    5.23    5.92   0
   8   7  -5   76.22   13.29   0
  -8   7   5   57.38   12.09   0
  -8  -7   5   86.63   11.69   0
   8  -7  -5   75.78   12.58   0
  -8   7   4   49.96   11.13   0
   8   7  -4   74.14   12.50   0
   8  -7  -4   46.40    9.50   0
  -8  -7   4   77.86   11.53   0
   8   7  -3  117.19   16.21   0
  -8   7   3   65.86   12.22   0
  -8  -7   3  106.15   14.18   0
   8  -7  -3   74.73   11.77   0
  -8   7   2    1.46    4.33   0
   8   7  -2    5.67    5.04   0
   8  -7  -2    1.75    3.69   0
  -8  -7   2    1.10    4.41   0
   8   7  -1   96.07   14.97   0
  -8   7   1   76.52   12.58   0
   8  -7  -1   93.10   11.69   0
  -8  -7   1   72.10   12.12   0
   8   7   0   14.47    6.45   0
  -8   7   0   11.78    6.01   0
   8  -7   0    9.52    4.16   0
  -8  -7   0   15.32    6.76   0
   8   7   1   11.25    6.27   0
  -8   7  -1    7.81    4.93   0
  -8  -7  -1    4.68    5.25   0
   8  -7   1   11.29    3.76   0
   8   7   2   10.48    5.49   0
  -8   7  -2   12.06    5.20   0
  -8  -7  -2   16.06    6.82   0
  -8   7  -3   55.44    9.61   0
   8   7   3   64.71   12.48   0
  -8  -7  -3   49.07   10.94   0
  -8   7  -4   -0.88    3.97   0
   8   7   4   -2.02    3.58   0
  -8  -7  -4    6.84    5.57   0
  -8   7  -5   -0.12    3.02   0
   8   7   5    3.01    4.80   0
  -8  -7  -5    2.05    5.52   0
   8   7   6   53.20   11.76   0
  -8   7  -6   38.55    7.36   0
  -8  -7  -6   45.98   11.74   0
  -8   7  -7    3.91    3.74   0
   8   7   7    5.85    5.81   0
  -8  -7  -7   -1.03    6.15   0
  -8   7  -8    5.60    4.01   0
   8   7   8    4.78    5.77   0
  -8  -7  -8    1.38    5.22   0
   8   7   9    5.80    6.18   0
  -8   7  -9    7.14    3.88   0
  -8  -7  -9    3.90    5.91   0
  -8  -7 -10    5.94    7.04   0
  -8   8  12  -10.43    5.87   0
   8   8 -12    0.47    5.34   0
   8  -8 -12    6.95    7.94   0
   8   8 -11    4.86    5.41   0
  -8   8  11    8.84    7.56   0
   8  -8 -11   -3.32    5.38   0
  -8   8  10   -3.80    5.26   0
   8   8 -10   -3.04    4.17   0
   8  -8 -10   -0.32    6.14   0
  -8   8   9    5.08    6.90   0
   8   8  -9   -3.04    4.49   0
   8  -8  -9   -1.89    4.82   0
   8   8  -8    2.82    5.16   0
  -8   8   8    3.28    5.87   0
   8  -8  -8   -1.74    4.50   0
  -8   8   7   -2.91    4.55   0
   8   8  -7   -1.62    5.01   0
   8  -8  -7    0.67    5.10   0
  -8   8   6   25.97    9.22   0
   8   8  -6   41.29   10.89   0
   8  -8  -6   16.88    8.06   0
   8   8  -5    8.06    6.59   0
  -8   8   5    2.60    5.53   0
   8  -8  -5    3.56    5.07   0
  -8  -8   5    4.40    4.41   0
  -8   8   4   -1.50    3.66   0
   8   8  -4   13.02    7.25   0
   8  -8  -4    7.99    5.71   0
  -8  -8   4   10.23    5.45   0
   8   8  -3   68.40   13.56   0
  -8   8   3   54.38   12.25   0
   8  -8  -3   80.02   12.73   0
  -8  -8   3   70.96   12.02   0
   8   8  -2   45.63   10.96   0
  -8   8   2   37.67   10.38   0
  -8  -8   2   46.78    9.89   0
   8  -8  -2   61.21   10.82   0
   8   8  -1    2.88    5.04   0
  -8   8   1    0.89    4.95   0
  -8  -8   1   -2.76    3.29   0
   8  -8  -1    2.37    3.68   0
   8   8   0    4.43    5.76   0
  -8   8   0    5.91    5.60   0
  -8  -8   0    1.79    5.07   0
  -8   8  -1   70.76   12.35   0
   8   8   1  105.52   16.13   0
  -8  -8  -1   97.16   15.41   0
   8   8   2   57.74   12.20   0
  -8   8  -2   62.25   11.50   0
  -8  -8  -2   44.11   10.56   0
  -8   8  -3   -0.23    3.93   0
   8   8   3   -2.63    3.44   0
  -8  -8  -3   -2.00    4.78   0
  -8   8  -4    4.94    4.94   0
   8   8   4    0.46    4.77   0
  -8  -8  -4   -0.53    5.56   0
  -8   8  -5   17.52    6.41   0
   8   8   5   18.01    8.00   0
  -8  -8  -5    8.76    6.81   0
   8   8   6    5.30    5.58   0
  -8   8  -6   -2.98    3.58   0
  -8  -8  -6    0.80    5.38   0
  -8   8  -7   17.21    6.45   0
   8   8   7   -2.07    4.69   0
  -8  -8  -7   16.32    9.01   0
   8   8   8    5.32    6.43   0
  -8   8  -8    2.48    4.14   0
  -8  -8  -8    5.34    7.34   0
  -8   8  -9    7.03    4.50   0
  -8  -8  -9    7.08    7.75   0
  -8   9  10   -5.35    6.68   0
   8   9 -10   -3.03    6.15   0
   8  -9 -10   -7.48    5.27   0
   8   9  -9   12.96    7.87   0
  -8   9   9    6.84    7.89   0
   8  -9  -9    7.56    7.32   0
   8   9  -8    4.99    7.65   0
  -8   9   8   12.32    9.30   0
   8  -9  -8    3.85    6.15   0
   8   9  -7   10.33    7.54   0
  -8   9   7    3.98    6.18   0
   8  -9  -7    7.61    6.86   0
  -8   9   6   15.83    8.30   0
   8   9  -6   -1.90    5.77   0
   8  -9  -6    1.66    6.17   0
   8   9  -5   -2.14    5.69   0
  -8   9   5   -1.23    5.13   0
   8  -9  -5    3.00    6.14   0
   8   9  -4   28.19   10.26   0
  -8   9   4   28.90    9.81   0
   8  -9  -4   34.30    9.98   0
  -8   9   3   -4.47    3.03   0
   8   9  -3   14.19    7.15   0
  -8  -9   3    8.26    5.77   0
   8  -9  -3   -0.24    3.99   0
   8   9  -2    4.53    6.13   0
  -8   9   2    1.91    5.06   0
  -8  -9   2    3.76    5.37   0
   8   9  -1   -0.41    5.48   0
  -8   9   1    3.19    5.57   0
  -8  -9   1    5.58    5.76   0
   8   9   0    5.11    6.34   0
  -8   9   0   -2.67    4.72   0
  -8  -9   0    1.13    5.35   0
   8   9   1   65.77   13.76   0
  -8   9  -1   39.93   10.13   0
  -8  -9  -1   60.72   12.66   0
  -8   9  -2    5.49    5.81   0
   8   9   2    4.77    6.37   0
  -8  -9  -2    1.52    5.15   0
  -8   9  -3   -2.31    4.32   0
   8   9   3    4.69    6.46   0
  -8  -9  -3    1.30    6.09   0
   8   9   4   -2.94    5.19   0
  -8   9  -4   -2.45    4.31   0
  -8  -9  -4    1.89    6.03   0
   8   9   5    3.00    6.34   0
  -8   9  -5   10.94    6.28   0
  -8  -9  -5   -1.46    5.92   0
  -8   9  -6   45.30    9.51   0
   8   9   6   50.06   12.05   0
  -8  -9  -6   22.84    9.76   0
  -8   9  -7    2.03    4.45   0
   8   9   7    3.19    6.39   0
  -8  -9  -7    3.57    7.02   0
  -8  10   7   37.62   13.25   0
   8  10  -7   19.84    9.47   0
   8 -10  -7   23.95   10.66   0
  -8  10   6    3.62    7.79   0
   8  10  -6    7.24    8.11   0
   8 -10  -6    0.73    6.01   0
  -8  10   5    4.77    8.04   0
   8  10  -5  -10.77    5.47   0
   8 -10  -5    8.24    6.44   0
  -8  10   4    0.47    4.91   0
   8  10  -4   -0.27    7.45   0
   8  10  -3   30.84   11.59   0
  -8  10   3   22.89    9.68   0
  -8  10   2    8.33    7.26   0
   8  10  -2   -5.58    5.59   0
  -8  10   1    3.02    6.61   0
   8  10  -1    4.76    7.36   0
  -8 -10   1   21.16    8.58   0
   8  10   0   41.84   12.94   0
  -8  10   0   44.88   11.64   0
  -8 -10   0   52.57   11.88   0
  -8  10  -1   -3.19    5.32   0
   8  10   1   -0.86    6.23   0
  -8 -10  -1    0.62    5.86   0
   8  10   2    3.83    6.10   0
  -8  10  -2    2.48    6.03   0
  -8 -10  -2    2.41    6.61   0
   8  10   3   12.51    9.42   0
  -8  10  -3   21.85    9.20   0
  -8 -10  -3   30.29   10.83   0
   8  10   4    5.79    8.41   0
  -8  10  -4    3.16    6.02   0
  -8 -10  -4    4.61    6.56   0
   8  10   5    0.72    5.98   0
  -8  10  -5   -0.87    4.84   0
  -8 -10  -5   -3.57    5.10   0
   9   0 -16   -2.09    4.87   0
   9   0 -15   -1.18    4.41   0
   9   0 -14   -0.49    4.92   0
   9   0 -13    0.37    3.59   0
   9   0 -12   69.21   11.88   0
  -9   0  12   46.59    8.31   0
   9   0 -11    2.62    4.09   0
  -9   0  11   -0.16    2.72   0
   9   0 -10    4.27    4.55   0
  -9   0  10   11.83    5.21   0
  -9   0   9    6.40    4.02   0
   9   0  -9   -1.62    3.26   0
  -9   0   8  105.82   12.49   0
   9   0  -8  105.28   13.02   0
  -9   0   7    1.19    3.37   0
   9   0  -7   -0.50    2.50   0
  -9   0   6   44.13    8.13   0
   9   0  -6   42.89    8.09   0
   9   0  -5   -0.51    2.59   0
  -9   0   5   -1.45    2.46   0
  -9   0   4    0.57    2.75   0
   9   0  -4   -2.42    2.30   0
   9   0  -3    2.03    3.24   0
  -9   0   3    5.89    3.62   0
   9   0  -2   13.41    4.31   0
  -9   0   2   15.88    4.81   0
  -9   0   1   -4.20    2.28   0
   9   0  -1   -0.81    2.09   0
   9   0   0   16.32    4.49   0
  -9   0   0   16.89    4.86   0
  -9   0  -1    2.60    2.92   0
   9   0   1    1.67    2.44   0
  -9   0  -1    1.92    2.82   0
  -9   0  -2  588.36   27.45   0
  -9   0  -2  595.09   27.05   0
   9   0   2  603.41   25.91   0
  -9   0  -3   -2.97    2.01   0
  -9   0  -3    1.02    2.56   0
   9   0   3    0.00    2.05   0
   9   0   4   85.32    7.10   0
  -9   0  -4   96.39   10.78   0
  -9   0  -4   96.12   10.34   0
  -9   0  -5    1.73    2.73   0
  -9   0  -5    6.25    3.53   0
   9   0   5    1.38    1.91   0
   9   0   6  185.36    8.70   0
  -9   0  -6  184.54   12.82   0
  -9   0  -6  172.07   12.92   0
  -9   0  -7   -3.64    2.24   0
  -9   0  -7    0.42    2.63   0
  -9   0  -8   -0.53    2.91   0
  -9   0  -8    0.93    3.51   0
  -9   0  -9   -1.89    3.35   0
  -9   0 -10   22.21    6.31   0
  -9   0 -11   -1.97    3.32   0
  -9   0 -12    9.44    5.07   0
  -9   0 -13   -0.27    4.14   0
  -9   0 -14    3.05    4.88   0
   9   1 -16   -3.18    4.62   0
   9  -1 -16    6.97    6.48   0
   9   1 -15   -2.93    4.16   0
   9  -1 -15    8.65    6.12   0
   9   1 -14   -4.15    3.37   0
   9  -1 -14    3.95    4.94   0
   9   1 -13    6.06    5.30   0
   9  -1 -13   -1.39    4.33   0
   9   1 -12    4.82    4.88   0
  -9   1  12    7.34    4.47   0
   9  -1 -12   -0.82    4.39   0
  -9   1  11   17.11    5.68   0
   9   1 -11   16.42    6.37   0
  -9  -1  11   19.52    5.43   0
   9  -1 -11   13.31    5.94   0
  -9   1  10   11.39    5.52   0
   9   1 -10    8.70    5.27   0
   9  -1 -10    4.43    4.88   0
  -9  -1  10    4.74    3.71   0
   9   1  -9   -6.96    2.16   0
  -9   1   9   -2.87    2.94   0
   9  -1  -9    2.16    3.79   0
  -9  -1   9    1.15    3.24   0
   9   1  -8    2.09    3.61   0
  -9   1   8    2.72    3.51   0
  -9  -1   8   -0.77    2.70   0
   9  -1  -8    8.79    4.50   0
   9   1  -7  102.36   12.27   0
  -9   1   7   81.02   11.00   0
  -9  -1   7   88.86   10.93   0
   9  -1  -7   82.62   11.12   0
   9   1  -6   87.60   10.96   0
  -9   1   6   80.23   11.03   0
   9  -1  -6   73.09   10.44   0
  -9  -1   6   94.52   11.09   0
  -9   1   5  171.16   13.01   0
   9   1  -5  131.95   11.85   0
  -9  -1   5  174.63   12.91   0
   9  -1  -5  162.47   12.57   0
  -9   1   4   92.13   11.50   0
   9   1  -4  127.74   13.47   0
  -9  -1   4  107.90   12.04   0
   9  -1  -4  130.62   10.97   0
  -9   1   3   40.04    7.62   0
   9   1  -3   35.40    6.96   0
  -9  -1   3   29.16    6.45   0
   9  -1  -3   22.46    5.66   0
  -9   1   2  284.13   17.06   0
   9   1  -2  263.45   16.42   0
   9  -1  -2  300.02   16.80   0
  -9  -1   2  278.23   16.96   0
  -9   1   1   72.39    9.58   0
   9   1  -1   67.52    8.90   0
   9  -1  -1   52.94    7.64   0
  -9  -1   1   60.07    8.61   0
  -9   1   0    8.19    4.41   0
   9   1   0   14.38    4.51   0
  -9   1   0   25.50    5.92   0
  -9  -1   0   22.85    5.62   0
   9  -1   0   22.26    4.93   0
  -9   1  -1    6.38    3.45   0
  -9   1  -1    4.19    3.06   0
   9   1   1   -0.62    2.42   0
  -9  -1  -1    2.38    3.18   0
   9  -1   1   -1.73    2.27   0
  -9   1  -2    0.06    2.53   0
  -9   1  -2    7.43    3.63   0
   9   1   2    2.38    2.76   0
  -9  -1  -2    4.58    3.77   0
   9  -1   2   12.57    3.84   0
   9   1   3   26.75    5.48   0
  -9   1  -3   24.68    5.28   0
  -9   1  -3   33.03    6.28   0
   9  -1   3   25.48    4.49   0
  -9  -1  -3   25.11    6.01   0
   9   1   4   76.50    8.93   0
  -9   1  -4   83.06    9.55   0
  -9   1  -4   76.81    9.36   0
  -9  -1  -4   67.36    9.30   0
   9  -1   4   72.75    5.51   0
   9  -1   4   79.67    5.84   0
  -9   1  -5    1.61    2.59   0
   9   1   5    1.41    2.47   0
  -9   1  -5    3.56    2.98   0
  -9  -1  -5    2.55    3.30   0
   9  -1   5    3.24    1.25   0
   9  -1   5    3.92    1.17   0
  -9   1  -6    7.34    3.46   0
  -9   1  -6    8.45    3.93   0
   9   1   6    7.47    2.85   0
  -9  -1  -6    9.21    4.46   0
  -9   1  -7  209.13   13.28   0
  -9   1  -7  216.76   13.75   0
   9   1   7  192.23   10.67   0
  -9  -1  -7  209.82   15.32   0
  -9   1  -8   48.74    7.69   0
  -9   1  -8   44.18    7.40   0
  -9  -1  -8   29.17    6.87   0
  -9   1  -9   20.36    5.18   0
  -9  -1  -9   19.37    5.91   0
  -9   1 -10   -1.62    2.83   0
  -9  -1 -10   -1.11    3.61   0
  -9   1 -11   35.30    7.10   0
  -9  -1 -11   40.22    8.58   0
  -9   1 -12    1.37    3.77   0
  -9  -1 -12   -1.60    4.08   0
  -9   1 -13   -2.14    3.96   0
  -9  -1 -13   -2.24    4.26   0
  -9   1 -14   -0.73    4.01   0
  -9  -1 -14    0.42    4.49   0
   9   2 -16    6.73    5.71   0
   9  -2 -16    5.66    6.03   0
   9   2 -15    0.35    4.82   0
   9  -2 -15    0.49    5.01   0
   9   2 -14   10.62    6.37   0
   9  -2 -14    1.77    5.04   0
   9   2 -13    2.65    5.58   0
  -9   2  13    0.69    4.07   0
   9  -2 -13    3.84    4.93   0
   9   2 -12   29.70    8.11   0
  -9   2  12   22.51    7.27   0
   9  -2 -12   16.71    7.01   0
  -9   2  11    0.52    4.10   0
   9   2 -11    8.32    5.42   0
  -9  -2  11    6.34    3.38   0
   9  -2 -11    5.60    5.11   0
  -9   2  10    5.17    4.52   0
   9   2 -10   -3.30    2.86   0
   9  -2 -10    4.80    4.75   0
  -9  -2  10    0.56    2.53   0
  -9   2   9   28.58    7.39   0
   9   2  -9   13.42    5.32   0
   9  -2  -9   22.95    7.76   0
  -9  -2   9   17.25    5.25   0
   9   2  -8  151.67   13.40   0
  -9   2   8  156.40   13.95   0
  -9  -2   8  178.16   12.80   0
   9  -2  -8  162.51   14.55   0
   9   2  -7   47.25    8.85   0
  -9   2   7   49.34    9.00   0
  -9  -2   7   67.07    9.76   0
   9  -2  -7   39.76    8.44   0
   9   2  -6    7.74    4.24   0
  -9   2   6    3.93    3.68   0
  -9  -2   6   11.18    4.80   0
   9  -2  -6   20.29    6.04   0
  -9   2   5   -3.28    1.82   0
   9   2  -5   -0.67    2.76   0
   9  -2  -5   -1.85    2.63   0
  -9  -2   5   -1.31    2.55   0
  -9   2   4   80.68   10.88   0
   9   2  -4  105.32   12.05   0
   9  -2  -4   68.64    9.64   0
  -9  -2   4   82.53   10.62   0
  -9   2   3   24.70    5.69   0
   9   2  -3   15.15    5.17   0
   9  -2  -3   18.36    5.52   0
  -9  -2   3   10.66    4.40   0
   9   2  -2    1.54    2.91   0
  -9   2   2    1.46    2.96   0
  -9  -2   2   -3.62    1.82   0
   9  -2  -2   -4.91    2.08   0
  -9   2   1   13.05    4.52   0
   9   2  -1   16.91    5.45   0
  -9  -2   1   26.28    6.21   0
   9  -2  -1   15.96    4.65   0
  -9   2   0   28.63    6.45   0
  -9   2   0   22.83    5.35   0
   9   2   0   16.03    4.74   0
   9  -2   0   31.93    6.14   0
  -9  -2   0    9.38    4.20   0
  -9   2  -1    9.72    4.03   0
  -9   2  -1    6.84    3.46   0
   9   2   1    8.79    4.46   0
  -9  -2  -1    5.80    4.09   0
   9  -2   1    6.06    2.89   0
  -9   2  -2   62.89    8.28   0
  -9   2  -2   49.77    7.76   0
   9   2   2   51.62    8.35   0
   9  -2   2   52.02    6.46   0
  -9  -2  -2   55.72    8.88   0
  -9   2  -3    0.69    1.79   0
  -9   2  -3   -0.46    2.26   0
   9   2   3   -3.11    1.84   0
   9  -2   3   -0.14    1.49   0
   9  -2   3   -0.05    1.56   0
  -9  -2  -3    0.26    3.02   0
  -9   2  -4    3.67    2.90   0
   9   2   4   -2.10    2.09   0
  -9   2  -4    0.70    2.42   0
  -9  -2  -4    9.45    4.96   0
   9  -2   4    3.61    1.21   0
   9  -2   4    2.92    1.13   0
  -9   2  -5    2.35    2.49   0
  -9   2  -5    2.29    2.81   0
   9   2   5    0.46    2.55   0
  -9  -2  -5   -1.14    3.13   0
   9   2   6   35.47    6.34   0
  -9   2  -6   25.84    5.38   0
  -9   2  -6   36.47    6.36   0
  -9  -2  -6   28.11    6.98   0
   9   2   7    0.56    2.19   0
  -9   2  -7    1.38    2.66   0
  -9   2  -7   -2.20    2.03   0
  -9  -2  -7   -1.18    3.34   0
   9   2   8    2.16    2.39   0
  -9   2  -8    1.34    2.79   0
  -9   2  -8    5.01    4.55   0
  -9  -2  -8    2.24    4.35   0
  -9   2  -9    8.30    3.76   0
  -9  -2  -9   13.12    6.22   0
  -9   2 -10   36.85    6.68   0
  -9  -2 -10   23.50    7.12   0
  -9   2 -11    3.53    3.54   0
  -9  -2 -11   -4.87    3.36   0
  -9   2 -12   50.14    7.91   0
  -9  -2 -12   37.01    8.90   0
  -9   2 -13    1.28    3.56   0
  -9  -2 -13    3.91    5.06   0
   9   3 -16   -2.85    4.75   0
   9  -3 -16    4.56    6.33   0
   9   3 -15   -0.67    4.62   0
   9  -3 -15    0.53    5.27   0
   9   3 -14    1.50    5.00   0
   9  -3 -14    2.70    5.21   0
  -9   3  13    4.83    5.60   0
   9   3 -13   11.71    6.55   0
   9  -3 -13    3.36    5.11   0
  -9   3  12    5.13    5.04   0
   9   3 -12    7.41    5.47   0
   9  -3 -12    1.99    4.51   0
   9   3 -11    5.79    4.79   0
  -9   3  11    3.69    4.97   0
   9  -3 -11    1.11    3.92   0
   9   3 -10   18.49    6.41   0
  -9   3  10    3.86    4.63   0
  -9  -3  10    4.16    3.08   0
   9  -3 -10    0.29    3.93   0
   9   3  -9    2.21    3.85   0
  -9   3   9    2.35    4.30   0
   9  -3  -9    4.86    4.75   0
  -9  -3   9    0.82    2.67   0
   9   3  -8  151.93   13.32   0
  -9   3   8  125.54   15.04   0
   9  -3  -8  148.39   16.72   0
  -9  -3   8  170.09   12.42   0
   9   3  -7  227.45   16.55   0
  -9   3   7  266.01   18.41   0
  -9  -3   7  232.84   15.48   0
   9  -3  -7  253.01   18.17   0
  -9   3   6   36.35    8.16   0
   9   3  -6   35.64    7.85   0
   9  -3  -6   51.90    9.48   0
  -9  -3   6   42.97    7.75   0
   9   3  -5    5.27    3.89   0
  -9   3   5    8.91    4.74   0
  -9  -3   5    7.37    4.13   0
   9  -3  -5   11.76    4.95   0
  -9   3   4   -3.19    2.62   0
   9   3  -4   -0.66    3.49   0
   9  -3  -4    0.59    2.72   0
  -9  -3   4    2.69    3.56   0
   9   3  -3   40.87    7.92   0
  -9   3   3   42.96    8.07   0
  -9  -3   3   36.16    7.68   0
   9  -3  -3   53.69    8.93   0
   9   3  -2   88.65   11.31   0
  -9   3   2   91.49   11.24   0
   9  -3  -2   81.37   10.18   0
  -9  -3   2   89.97   11.27   0
  -9   3   1   45.92    8.29   0
   9   3  -1   52.05    8.66   0
   9  -3  -1   49.80    7.57   0
  -9  -3   1   38.31    7.94   0
  -9   3   0    6.30    3.62   0
   9   3   0   25.86    6.24   0
  -9  -3   0   15.08    5.57   0
   9  -3   0   15.65    4.38   0
  -9   3  -1   96.72   10.93   0
  -9   3  -1  119.62   10.16   0
   9   3   1   93.31   11.44   0
  -9  -3  -1   97.97   12.39   0
   9  -3   1  103.14    8.20   0
   9   3   2   23.49    6.17   0
  -9   3  -2   18.99    4.83   0
  -9   3  -2   14.47    4.68   0
   9  -3   2   26.49    4.43   0
  -9  -3  -2   10.87    5.17   0
  -9   3  -3   79.85    9.36   0
  -9   3  -3   82.83    9.30   0
   9   3   3   61.41    9.47   0
   9  -3   3   62.51    4.64   0
  -9  -3  -3   75.82   11.03   0
  -9   3  -4    8.36    3.40   0
  -9   3  -4    2.68    2.84   0
   9   3   4    5.12    3.79   0
  -9  -3  -4    8.42    5.29   0
  -9   3  -5   22.71    5.24   0
   9   3   5   13.94    4.71   0
  -9   3  -5   25.76    5.19   0
  -9  -3  -5   35.72    8.46   0
   9   3   6    5.19    3.60   0
  -9   3  -6    2.23    2.70   0
  -9   3  -6    2.90    2.36   0
  -9  -3  -6    6.60    4.54   0
   9   3   7   -1.39    2.97   0
  -9   3  -7    3.10    2.54   0
  -9   3  -7   -2.37    1.83   0
  -9  -3  -7   -4.02    3.34   0
   9   3   8   15.66    4.71   0
  -9   3  -8   25.82    5.44   0
  -9  -3  -8   20.19    7.27   0
  -9   3  -9    0.68    2.69   0
  -9  -3  -9   -2.27    3.01   0
  -9   3 -10    1.52    2.79   0
  -9  -3 -10    5.50    5.57   0
  -9   3 -11   12.62    4.38   0
  -9  -3 -11   16.28    7.23   0
  -9   3 -12    2.06    3.36   0
  -9  -3 -12   -1.36    4.51   0
  -9  -3 -13   -3.08    4.93   0
   9   4 -15    4.41    5.42   0
   9  -4 -15    4.05    7.01   0
   9   4 -14    5.55    4.54   0
   9  -4 -14   -1.75    4.49   0
   9   4 -13    7.41    5.36   0
  -9   4  13   -3.38    4.47   0
   9  -4 -13   -0.22    4.84   0
   9   4 -12    6.47    5.47   0
  -9   4  12   10.39    6.37   0
   9  -4 -12   17.97    7.95   0
  -9   4  11    8.30    5.95   0
   9   4 -11   13.86    6.12   0
   9  -4 -11   13.17    7.01   0
  -9   4  10   16.36    6.54   0
   9   4 -10    4.56    4.85   0
   9  -4 -10   12.86    6.60   0
   9   4  -9    2.96    4.27   0
  -9   4   9    9.65    5.71   0
   9  -4  -9    3.01    4.36   0
  -9  -4   9    9.29    3.94   0
  -9   4   8   21.05    7.69   0
   9   4  -8   24.63    6.74   0
  -9  -4   8   32.65    6.86   0
   9  -4  -8   34.56    8.87   0
  -9   4   7    3.57    4.59   0
   9   4  -7    2.24    3.64   0
  -9  -4   7    4.70    3.77   0
   9  -4  -7    2.45    4.68   0
  -9   4   6  221.34   16.78   0
   9   4  -6  171.52   14.13   0
  -9  -4   6  152.39   12.86   0
   9  -4  -6  186.15   15.54   0
  -9   4   5   -0.41    3.52   0
   9   4  -5   -4.09    2.24   0
  -9  -4   5   -0.46    2.84   0
   9  -4  -5    0.55    3.41   0
   9   4  -4    8.58    4.70   0
  -9   4   4   -1.68    2.64   0
   9  -4  -4    2.17    3.54   0
  -9  -4   4    7.65    4.38   0
   9   4  -3   54.05    9.01   0
  -9   4   3   63.55    9.90   0
   9  -4  -3   53.79    8.78   0
  -9  -4   3   88.45   12.10   0
   9   4  -2  115.74   13.41   0
  -9   4   2  147.77   12.93   0
   9  -4  -2  137.78   11.53   0
  -9  -4   2  142.57   15.27   0
   9   4  -1    7.67    4.57   0
  -9   4   1    3.49    3.45   0
   9  -4  -1    6.42    3.55   0
  -9  -4   1   10.65    5.20   0
  -9   4   0    0.78    3.04   0
   9   4   0    0.87    3.21   0
  -9  -4   0    5.37    4.34   0
   9  -4   0    4.65    3.12   0
  -9   4  -1   11.63    4.55   0
   9   4   1   19.09    6.04   0
   9  -4   1   15.15    4.17   0
  -9  -4  -1    8.40    5.27   0
  -9   4  -2   86.82    9.88   0
   9   4   2  116.40   13.76   0
  -9   4  -2  103.76   11.74   0
  -9  -4  -2   78.77   11.77   0
   9  -4   2   83.87    6.60   0
  -9   4  -3   70.10    8.79   0
   9   4   3   75.46   10.99   0
  -9   4  -3   70.76    9.21   0
   9  -4   3   62.20    3.55   0
   9  -4   3   63.93    3.64   0
  -9  -4  -3   78.58   11.64   0
  -9   4  -4    4.53    2.93   0
   9   4   4   -2.41    3.07   0
  -9   4  -4    7.20    3.80   0
  -9  -4  -4    0.28    3.83   0
  -9   4  -5   15.48    4.46   0
   9   4   5   15.61    5.47   0
  -9   4  -5    7.92    3.93   0
  -9  -4  -5    9.95    5.41   0
   9   4   6  117.36   13.61   0
  -9   4  -6  115.65    9.50   0
  -9   4  -6  111.20    8.90   0
  -9  -4  -6  107.91   14.95   0
  -9   4  -7   79.93    9.09   0
   9   4   7   71.58   10.84   0
  -9  -4  -7   67.35   12.54   0
   9   4   8   35.17    7.78   0
  -9   4  -8   24.18    5.23   0
  -9  -4  -8   33.15    9.38   0
  -9   4  -9    8.05    3.60   0
  -9  -4  -9    1.33    4.79   0
  -9   4 -10   -2.93    2.48   0
  -9  -4 -10   -5.62    4.19   0
  -9   4 -11   -0.21    2.95   0
  -9  -4 -11    9.14    6.97   0
  -9  -4 -12    1.18    5.96   0
   9   5 -15    3.51    5.36   0
   9  -5 -15    8.12    7.66   0
   9   5 -14   -3.80    4.11   0
   9  -5 -14   -1.01    5.66   0
   9   5 -13    2.69    4.91   0
  -9   5  13   -3.44    4.84   0
   9  -5 -13   -3.31    4.65   0
   9   5 -12    3.03    5.68   0
  -9   5  12   -5.18    5.17   0
   9  -5 -12   -2.30    4.52   0
   9   5 -11   11.33    6.06   0
  -9   5  11    7.04    6.41   0
   9  -5 -11   11.48    7.25   0
  -9   5  10    2.81    4.73   0
   9   5 -10    8.05    5.53   0
   9  -5 -10    2.14    5.27   0
   9   5  -9   -1.81    3.39   0
  -9   5   9   -4.00    3.48   0
   9  -5  -9   -0.07    4.17   0
   9   5  -8    1.00    3.78   0
  -9   5   8    4.54    5.26   0
   9  -5  -8    5.49    4.86   0
  -9  -5   8    4.99    3.40   0
   9   5  -7  235.52   17.86   0
  -9   5   7  265.23   20.45   0
   9  -5  -7  255.63   19.44   0
  -9  -5   7  239.72   16.12   0
   9   5  -6  182.34   15.57   0
  -9   5   6  155.80   18.30   0
   9  -5  -6  215.12   17.14   0
  -9  -5   6  185.19   14.15   0
   9   5  -5    6.00    4.53   0
  -9   5   5    9.93    5.44   0
   9  -5  -5    8.97    5.43   0
  -9  -5   5   23.76    6.56   0
  -9   5   4    0.73    3.40   0
   9   5  -4    5.27    4.01   0
   9  -5  -4   -0.77    3.15   0
  -9  -5   4   -2.32    2.68   0
  -9   5   3   74.79   12.08   0
   9   5  -3  116.28   14.90   0
   9  -5  -3   98.94   12.98   0
  -9  -5   3  105.47   13.32   0
  -9   5   2    1.47    3.44   0
   9   5  -2    2.28    4.11   0
  -9  -5   2    4.31    3.86   0
   9  -5  -2   -1.91    2.97   0
   9   5  -1    1.48    3.74   0
  -9   5   1   19.20    6.36   0
   9  -5  -1   15.92    5.19   0
  -9  -5   1   13.67    5.75   0
   9   5   0   32.25    8.37   0
  -9   5   0   16.61    6.22   0
  -9  -5   0   22.04    6.66   0
   9  -5   0   28.32    5.97   0
  -9   5  -1   43.75    8.37   0
   9   5   1   16.83    6.22   0
   9  -5   1   25.33    5.22   0
  -9  -5  -1   16.99    6.67   0
   9   5   2   -1.88    3.20   0
  -9   5  -2    0.76    3.11   0
  -9  -5  -2    1.26    3.22   0
   9  -5   2    0.55    1.69   0
  -9   5  -3   70.40    9.28   0
  -9   5  -3   63.77    9.31   0
   9   5   3   46.79    9.97   0
  -9  -5  -3   50.04   10.36   0
  -9   5  -4   53.96    8.46   0
   9   5   4   80.76   12.15   0
  -9   5  -4   52.07    8.05   0
  -9  -5  -4   68.64   12.61   0
   9   5   5   -2.20    3.07   0
  -9   5  -5    2.30    3.32   0
  -9   5  -5    0.57    2.83   0
  -9  -5  -5    1.19    4.98   0
  -9   5  -6   69.55    8.90   0
   9   5   6   75.83   11.89   0
  -9  -5  -6   58.65   12.10   0
  -9   5  -7    4.16    3.23   0
   9   5   7   -0.37    3.61   0
  -9  -5  -7    2.40    5.28   0
   9   5   8   24.32    6.90   0
  -9   5  -8   25.06    5.64   0
  -9  -5  -8   16.21    6.88   0
  -9   5  -9   71.58    8.62   0
  -9  -5  -9   62.80   13.08   0
  -9   5 -10   10.94    4.02   0
  -9  -5 -10   16.06    8.08   0
  -9  -5 -11   57.11   13.12   0
  -9  -5 -12   -1.48    6.20   0
   9   6 -14    4.64    6.42   0
   9  -6 -14    1.09    6.36   0
   9   6 -13    8.08    6.66   0
  -9   6  13    6.26    7.08   0
   9  -6 -13   -3.53    6.60   0
   9   6 -12    3.45    5.19   0
  -9   6  12   20.76    8.53   0
   9  -6 -12    1.72    5.95   0
  -9   6  11   -3.18    6.00   0
   9   6 -11   -3.07    4.16   0
   9  -6 -11   -2.24    4.96   0
   9   6 -10   -1.13    4.41   0
  -9   6  10    0.86    5.03   0
   9  -6 -10   -1.58    3.62   0
  -9   6   9   -1.51    5.01   0
   9   6  -9   -1.71    3.89   0
   9  -6  -9   -1.63    4.53   0
   9   6  -8    8.18    5.27   0
  -9   6   8    5.37    6.32   0
   9  -6  -8    2.91    5.28   0
  -9   6   7    2.46    4.18   0
   9   6  -7    4.97    4.92   0
  -9  -6   7    6.12    4.25   0
   9  -6  -7   -0.70    4.69   0
  -9   6   6    6.84    5.31   0
   9   6  -6    0.23    4.51   0
   9  -6  -6   -3.62    2.83   0
  -9  -6   6    1.31    3.59   0
   9   6  -5  197.61   16.76   0
  -9   6   5  196.09   17.74   0
   9  -6  -5  175.90   15.83   0
  -9  -6   5  192.44   14.92   0
   9   6  -4  102.70   14.23   0
  -9   6   4  108.56   15.60   0
   9  -6  -4   79.48   12.12   0
  -9  -6   4  107.10   13.65   0
  -9   6   3    2.76    3.97   0
   9   6  -3   -2.51    3.55   0
   9  -6  -3    5.99    4.48   0
  -9  -6   3   -1.32    3.17   0
  -9   6   2  138.11   15.94   0
   9   6  -2  149.09   17.28   0
  -9  -6   2  165.98   17.75   0
   9  -6  -2  152.08   13.41   0
  -9   6   1   -0.28    3.72   0
   9   6  -1    5.06    5.25   0
   9  -6  -1    5.05    3.57   0
  -9  -6   1   -4.14    3.09   0
  -9   6   0   34.23    8.01   0
   9   6   0   33.68    8.86   0
  -9  -6   0   38.65    9.05   0
   9  -6   0   36.50    6.71   0
   9   6   1   -3.66    3.77   0
  -9   6  -1    7.52    5.06   0
  -9  -6  -1   -0.40    3.49   0
   9  -6   1   -0.92    2.45   0
   9   6   2   -0.81    4.09   0
  -9   6  -2    2.23    3.39   0
  -9  -6  -2    4.29    4.90   0
   9  -6   2    5.22    2.43   0
  -9   6  -3    1.54    3.48   0
   9   6   3    1.85    4.43   0
  -9  -6  -3    0.20    3.65   0
  -9   6  -4   26.44    6.52   0
   9   6   4   39.66    9.68   0
  -9  -6  -4   36.34   10.51   0
   9   6   5   71.03   12.38   0
  -9   6  -5   45.34    8.27   0
  -9  -6  -5   49.77   11.48   0
  -9   6  -6   19.28    5.27   0
   9   6   6    8.03    5.86   0
  -9  -6  -6    4.15    5.57   0
   9   6   7   -0.65    3.88   0
  -9   6  -7    3.20    3.51   0
  -9  -6  -7   -1.62    3.83   0
  -9   6  -8   11.59    4.69   0
   9   6   8    4.36    5.23   0
  -9  -6  -8   11.55    7.62   0
  -9   6  -9   12.38    4.25   0
  -9  -6  -9    2.55    6.34   0
  -9   6 -10    0.45    3.60   0
  -9  -6 -10    2.49    5.78   0
  -9  -6 -11   -3.67    5.17   0
   9   7 -13   -2.08    5.22   0
  -9   7  13   13.13    8.29   0
   9  -7 -13    0.58    5.87   0
  -9   7  12    1.74    6.91   0
   9   7 -12    8.31    6.89   0
   9  -7 -12   -4.61    5.01   0
  -9   7  11    4.00    7.04   0
   9   7 -11   -2.47    4.91   0
   9  -7 -11    1.80    5.98   0
   9   7 -10   -4.39    3.48   0
  -9   7  10    4.65    6.67   0
   9  -7 -10    0.67    4.81   0
  -9   7   9   23.10    9.15   0
   9   7  -9   42.64   10.13   0
   9  -7  -9   17.51    8.17   0
  -9   7   8   -2.22    4.04   0
   9   7  -8   10.93    6.27   0
   9  -7  -8    4.49    5.35   0
  -9   7   7    5.29    5.78   0
   9   7  -7   14.94    6.61   0
   9  -7  -7   -0.35    4.40   0
   9   7  -6   17.01    7.12   0
  -9   7   6   37.29   10.29   0
   9  -7  -6   22.87    8.01   0
  -9  -7   6   23.49    6.82   0
   9   7  -5   28.83    8.56   0
  -9   7   5   36.48   10.16   0
  -9  -7   5   17.99    5.98   0
   9  -7  -5   41.16    9.62   0
   9   7  -4   19.91    7.51   0
  -9   7   4   11.08    6.22   0
   9  -7  -4    7.94    5.37   0
  -9  -7   4    4.54    4.67   0
  -9   7   3    1.77    4.55   0
   9   7  -3    9.31    5.99   0
  -9  -7   3    9.38    5.40   0
   9  -7  -3    5.84    4.33   0
   9   7  -2    9.34    6.08   0
  -9   7   2    1.64    5.91   0
   9  -7  -2    4.74    4.18   0
  -9  -7   2    8.68    5.48   0
   9   7  -1   53.65   11.53   0
  -9   7   1   20.07    7.20   0
  -9  -7   1   28.98    8.68   0
   9  -7  -1   36.81    7.82   0
   9   7   0   27.48    8.84   0
  -9   7   0   17.34    6.90   0
   9  -7   0   22.19    5.78   0
  -9  -7   0   24.45    8.43   0
  -9   7  -1   55.77   10.38   0
   9   7   1   64.49   12.07   0
  -9  -7  -1   41.12   10.25   0
   9   7   2    5.45    5.18   0
  -9   7  -2   -2.37    3.36   0
  -9  -7  -2   -2.82    4.19   0
  -9   7  -3   17.65    6.46   0
   9   7   3   21.55    7.69   0
  -9  -7  -3   26.09    8.71   0
  -9   7  -4   32.26    7.83   0
   9   7   4   36.94    9.88   0
  -9  -7  -4   20.35    7.93   0
  -9   7  -5    6.61    4.57   0
   9   7   5    1.06    5.06   0
  -9  -7  -5    6.05    6.38   0
  -9   7  -6    9.93    4.89   0
   9   7   6   13.44    6.82   0
  -9  -7  -6    4.92    5.38   0
  -9   7  -7    3.49    3.80   0
   9   7   7   -3.49    4.47   0
  -9  -7  -7    1.49    5.17   0
   9   7   8   10.29    6.37   0
  -9   7  -8    9.97    4.81   0
  -9  -7  -8   23.76    9.36   0
  -9   7  -9    7.43    4.34   0
  -9  -7  -9   12.10    8.01   0
  -9  -7 -10    1.98    6.09   0
   9   8 -11    8.82    7.45   0
  -9   8  11    2.03    6.53   0
   9  -8 -11   11.23    8.18   0
  -9   8  10   -2.75    6.28   0
   9   8 -10    0.57    5.77   0
   9  -8 -10   11.66    8.08   0
  -9   8   9   33.44   10.71   0
   9   8  -9   18.75    8.48   0
   9  -8  -9   20.27    9.34   0
  -9   8   8    8.40    6.68   0
   9   8  -8    3.05    5.98   0
   9  -8  -8    6.14    5.98   0
   9   8  -7   17.18    7.44   0
  -9   8   7   30.74   10.94   0
   9  -8  -7   19.42    8.92   0
   9   8  -6   -4.76    5.16   0
  -9   8   6    0.56    6.08   0
   9  -8  -6    5.86    5.58   0
   9   8  -5   27.20    9.48   0
  -9   8   5    5.01    6.74   0
  -9  -8   5   14.84    6.07   0
   9  -8  -5    6.83    5.52   0
  -9   8   4    2.68    5.97   0
   9   8  -4   -4.96    4.49   0
  -9  -8   4   -0.25    3.76   0
   9  -8  -4    3.43    5.01   0
  -9   8   3   -0.72    4.33   0
   9   8  -3   21.02    7.99   0
   9  -8  -3   10.86    5.44   0
  -9  -8   3    6.33    5.70   0
   9   8  -2   18.90    7.42   0
  -9   8   2   17.82    7.74   0
  -9  -8   2   21.13    7.34   0
   9  -8  -2   17.27    6.06   0
  -9   8   1    9.93    6.12   0
   9   8  -1   -1.88    4.95   0
  -9  -8   1    2.17    4.31   0
   9  -8  -1   -0.12    3.29   0
   9   8   0    0.37    5.85   0
  -9   8   0    9.11    6.06   0
  -9  -8   0    3.91    5.31   0
   9   8   1    5.29    5.29   0
  -9   8  -1    4.73    5.54   0
  -9  -8  -1    1.71    5.42   0
   9   8   2   10.18    7.00   0
  -9   8  -2   -4.28    3.55   0
  -9  -8  -2    0.47    5.38   0
   9   8   3   15.28    8.32   0
  -9   8  -3   22.20    7.34   0
  -9  -8  -3    5.09    6.19   0
  -9   8  -4    0.67    4.17   0
   9   8   4    2.94    5.47   0
  -9  -8  -4    0.27    5.11   0
   9   8   5   45.40   11.55   0
  -9   8  -5   21.05    6.91   0
  -9  -8  -5   20.24    8.52   0
   9   8   6    0.91    5.84   0
  -9   8  -6    3.49    4.04   0
  -9  -8  -6   -8.33    4.72   0
   9   8   7   -3.40    4.22   0
  -9   8  -7   11.30    5.71   0
  -9  -8  -7    2.32    6.40   0
   9   8   8   -3.35    4.70   0
  -9   8  -8    5.53    4.32   0
  -9  -8  -8   -8.45    4.92   0
  -9   9   9    1.11    7.58   0
   9   9  -9   -2.13    6.40   0
   9  -9  -9    3.02    6.51   0
   9   9  -8   11.65    8.56   0
  -9   9   8   -0.14    6.12   0
   9  -9  -8   -2.19    5.57   0
  -9   9   7    2.15    6.10   0
   9   9  -7   11.89    7.49   0
   9  -9  -7    2.08    6.45   0
  -9   9   6    6.47    7.15   0
   9   9  -6    6.52    7.18   0
   9  -9  -6   15.86    7.77   0
  -9   9   5    0.53    5.52   0
   9   9  -5    1.54    6.16   0
   9  -9  -5    0.70    5.10   0
  -9   9   4   22.52    8.80   0
   9   9  -4   31.97   11.17   0
   9  -9  -4   24.83    8.45   0
   9   9  -3    6.57    6.82   0
  -9   9   3    5.15    6.25   0
  -9  -9   3    7.03    4.96   0
   9  -9  -3   -1.52    4.18   0
  -9   9   2   18.19    8.31   0
   9   9  -2   18.05    8.51   0
  -9  -9   2   27.34    9.04   0
  -9   9   1   36.41   10.46   0
   9   9  -1   24.43   10.67   0
  -9  -9   1   39.88   11.30   0
  -9   9   0   13.16    7.96   0
   9   9   0   -4.75    6.08   0
  -9  -9   0   10.49    7.66   0
  -9   9  -1   11.59    6.93   0
   9   9   1   -1.94    6.22   0
  -9  -9  -1    3.68    5.52   0
  -9   9  -2   11.84    6.38   0
   9   9   2   14.01    8.10   0
  -9  -9  -2    4.83    6.45   0
  -9   9  -3   -5.38    3.65   0
   9   9   3   16.34    8.35   0
  -9  -9  -3    1.16    5.51   0
   9   9   4   38.28   11.88   0
  -9   9  -4   43.86    9.80   0
  -9  -9  -4   28.61   10.20   0
  -9   9  -5    9.56    6.22   0
   9   9   5    4.86    7.25   0
  -9  -9  -5    5.10    7.11   0
  -9   9  -6   -2.69    4.55   0
   9   9   6    0.41    6.68   0
  -9  -9  -6   -6.70    3.46   0
   9  10  -6    6.28    8.79   0
  -9  10   6    3.00    6.80   0
   9 -10  -6   -4.34    5.52   0
  -9  10   5   12.02    7.84   0
   9  10  -5    9.58    9.38   0
  -9  10   4   25.18   10.59   0
   9  10  -4    5.00    8.96   0
   9  10  -3   -8.78    4.25   0
  -9  10   3    4.84    6.35   0
   9  10  -2    3.53    7.15   0
  -9  10   2    2.66    6.45   0
  -9  10   1   74.89   14.81   0
   9  10  -1   54.84   14.08   0
  -9 -10   1   66.42   13.60   0
  -9  10   0    5.84    7.07   0
   9  10   0   -1.42    6.90   0
  -9 -10   0    5.61    6.24   0
  -9  10  -1   -2.31    5.32   0
   9  10   1   -0.44    7.45   0
  -9 -10  -1   -3.63    5.47   0
   9  10   2    7.86    7.71   0
  -9  10  -2    0.41    5.71   0
  -9 -10  -2   -2.35    5.24   0
   9  10   3    9.01    9.20   0
  -9  10  -3   -1.66    5.00   0
  -9 -10  -3   -9.37    3.63   0
  -9  10  -4   -0.42    5.34   0
  -9 -10  -4   -0.97    6.15   0
  10   0 -16   -2.88    4.54   0
  10   0 -15   -0.02    5.01   0
  10   0 -14    4.39    5.61   0
  10   0 -13   -0.49    3.85   0
 -10   0  12    3.63    4.22   0
  10   0 -12   -3.06    3.65   0
  10   0 -11    5.53    5.01   0
 -10   0  11    1.99    3.77   0
  10   0 -10  374.16   23.41   0
 -10   0  10  375.93   22.31   0
 -10   0   9   -1.92    3.01   0
  10   0  -9   -4.05    2.36   0
 -10   0   8   74.61   10.99   0
  10   0  -8   83.79   12.66   0
  10   0  -7    1.04    3.34   0
 -10   0   7    2.33    3.38   0
 -10   0   6   64.97    9.98   0
  10   0  -6   62.40   10.01   0
  10   0  -5    2.22    3.65   0
 -10   0   5    5.28    3.58   0
 -10   0   4   57.77    9.18   0
  10   0  -4   68.11    9.57   0
  10   0  -3    1.89    3.14   0
 -10   0   3   -1.27    2.81   0
  10   0  -2   33.45    7.19   0
 -10   0   2   33.65    7.47   0
 -10   0   1   -1.75    2.35   0
  10   0  -1   -0.95    2.18   0
  10   0   0  103.17    9.44   0
 -10   0   0  117.38   10.38   0
 -10   0  -1    0.54    3.19   0
  10   0   1    3.63    2.94   0
  10   0   2   58.70    8.09   0
 -10   0  -2   54.65    9.14   0
 -10   0  -3    5.75    3.52   0
  10   0   3    1.05    2.39   0
 -10   0  -4    1.46    3.15   0
  10   0   4    2.58    2.30   0
 -10   0  -5    0.89    3.31   0
  10   0   5    0.30    1.90   0
 -10   0  -6   61.79    9.39   0
 -10   0  -7    6.08    4.33   0
 -10   0  -8   61.04    9.76   0
 -10   0  -9    0.58    3.45   0
 -10   0 -10  145.07   13.21   0
 -10   0 -11    2.54    4.57   0
 -10   0 -12   -1.94    4.03   0
 -10   0 -13   -1.70    3.85   0
  10   1 -16   -1.83    5.21   0
  10  -1 -16    1.06    5.32   0
  10   1 -15    8.14    5.86   0
  10  -1 -15    1.51    5.97   0
  10   1 -14   -5.96    2.91   0
  10  -1 -14    2.60    5.02   0
  10   1 -13    2.47    5.14   0
  10  -1 -13   -2.71    4.20   0
 -10   1  12    2.00    3.84   0
  10   1 -12   14.47    6.77   0
  10  -1 -12    9.60    6.11   0
 -10  -1  12    4.30    4.22   0
 -10   1  11   24.90    6.89   0
  10   1 -11   18.51    7.43   0
 -10  -1  11   18.71    6.05   0
  10  -1 -11    9.80    5.96   0
  10   1 -10   31.68    8.23   0
 -10   1  10   14.07    5.79   0
  10  -1 -10   17.05    6.52   0
 -10  -1  10   28.85    6.99   0
  10   1  -9  182.05   15.39   0
 -10   1   9  181.03   14.89   0
 -10  -1   9  158.51   13.44   0
  10  -1  -9  191.90   15.66   0
  10   1  -8   10.74    4.93   0
 -10   1   8    6.47    4.35   0
 -10  -1   8   16.53    5.82   0
  10  -1  -8    2.16    3.85   0
 -10   1   7   21.21    6.29   0
  10   1  -7   13.51    5.14   0
  10  -1  -7    8.57    4.81   0
 -10  -1   7   19.23    5.95   0
 -10   1   6   43.45    8.76   0
  10   1  -6   48.40    8.92   0
 -10  -1   6   45.55    8.44   0
  10  -1  -6   41.55    8.56   0
 -10   1   5   25.98    6.84   0
  10   1  -5   15.21    5.31   0
 -10  -1   5    8.97    4.35   0
  10  -1  -5   20.30    5.98   0
 -10   1   4    6.27    4.15   0
  10   1  -4   -0.07    3.18   0
 -10  -1   4    3.83    3.88   0
  10  -1  -4    8.30    4.12   0
  10   1  -3   49.47    8.64   0
 -10   1   3   49.41    8.42   0
 -10  -1   3   36.31    7.69   0
  10  -1  -3   42.69    7.81   0
  10   1  -2    5.30    3.64   0
 -10   1   2    6.30    3.73   0
 -10  -1   2   -0.30    3.13   0
  10  -1  -2    4.67    3.48   0
 -10   1   1   44.23    7.87   0
  10   1  -1   57.33    8.48   0
  10  -1  -1   52.20    8.10   0
 -10  -1   1   39.21    7.39   0
 -10   1   0    0.68    3.24   0
  10   1   0    5.08    3.70   0
  10  -1   0    1.83    2.72   0
 -10  -1   0    6.97    3.74   0
 -10   1  -1   98.43   11.19   0
  10   1   1  105.43   11.40   0
  10  -1   1   90.31   10.05   0
 -10  -1  -1   68.12    9.75   0
 -10   1  -2    4.29    3.54   0
  10   1   2    4.91    3.29   0
  10  -1   2    9.34    3.62   0
 -10  -1  -2    8.31    4.09   0
 -10   1  -3   39.55    7.07   0
 -10   1  -3   34.84    6.99   0
  10   1   3   39.30    6.78   0
  10  -1   3   43.36    6.07   0
 -10  -1  -3   41.93    7.89   0
  10   1   4   62.54    8.50   0
 -10   1  -4   60.84    8.94   0
 -10   1  -4   62.56    8.50   0
  10  -1   4   58.94    6.51   0
 -10  -1  -4   69.82   10.38   0
 -10   1  -5    2.51    3.32   0
  10   1   5   14.02    4.09   0
 -10   1  -5   18.10    4.93   0
  10  -1   5   12.40    2.28   0
  10  -1   5   13.39    2.61   0
 -10  -1  -5    9.31    4.75   0
 -10   1  -6   23.47    5.96   0
  10   1   6    7.98    3.40   0
 -10   1  -6   17.20    5.06   0
 -10  -1  -6    3.01    3.69   0
  10   1   7    8.20    3.07   0
 -10   1  -7   11.70    4.43   0
 -10   1  -7   20.83    5.55   0
 -10  -1  -7   10.82    5.01   0
 -10   1  -8    9.70    4.38   0
 -10  -1  -8    6.19    4.98   0
 -10   1  -9   45.70    8.11   0
 -10  -1  -9   37.27    8.51   0
 -10   1 -10    0.06    3.02   0
 -10  -1 -10    2.18    4.62   0
 -10   1 -11    1.28    3.62   0
 -10  -1 -11   12.70    6.15   0
 -10   1 -12    2.24    4.13   0
 -10  -1 -12   -0.19    4.05   0
 -10   1 -13   -0.53    4.08   0
 -10  -1 -13   -0.61    4.42   0
  10   2 -16    4.40    5.40   0
  10  -2 -16   -2.01    5.76   0
  10   2 -15   11.45    7.35   0
  10  -2 -15    3.84    5.50   0
  10   2 -14   17.79    7.61   0
  10  -2 -14   -4.52    4.45   0
  10   2 -13   10.83    6.92   0
 -10   2  13    4.46    4.39   0
  10  -2 -13    2.26    4.81   0
 -10   2  12    2.03    4.39   0
  10   2 -12    0.03    4.51   0
  10  -2 -12    0.93    4.84   0
  10   2 -11    5.56    5.17   0
 -10   2  11    2.46    4.35   0
  10  -2 -11    7.19    5.48   0
 -10  -2  11    3.78    3.82   0
  10   2 -10   15.73    6.33   0
 -10   2  10    9.72    5.79   0
  10  -2 -10   28.66    8.23   0
 -10  -2  10   17.86    5.76   0
  10   2  -9  146.92   16.30   0
 -10   2   9  150.48   16.90   0
  10  -2  -9  153.49   17.41   0
 -10  -2   9  143.01   12.18   0
  10   2  -8    2.91    3.98   0
 -10   2   8    0.35    3.11   0
 -10  -2   8    2.26    3.53   0
  10  -2  -8    1.24    3.87   0
 -10   2   7   11.62    5.49   0
  10   2  -7    7.82    4.68   0
 -10  -2   7    4.57    3.80   0
  10  -2  -7    4.50    4.72   0
  10   2  -6   76.14   10.97   0
 -10   2   6   52.34    9.59   0
  10  -2  -6   54.07    9.77   0
 -10  -2   6   76.22   10.83   0
 -10   2   5   28.95    7.05   0
  10   2  -5   48.08    8.93   0
  10  -2  -5   41.92    8.55   0
 -10  -2   5   55.71    9.57   0
 -10   2   4   -1.21    2.60   0
  10   2  -4   -2.34    2.33   0
  10  -2  -4   -0.86    2.82   0
 -10  -2   4    1.02    3.04   0
  10   2  -3   19.53    5.95   0
 -10   2   3   22.21    6.59   0
 -10  -2   3   29.70    6.99   0
  10  -2  -3   11.56    4.80   0
 -10   2   2  114.92   12.88   0
  10   2  -2  125.82   11.03   0
 -10  -2   2   82.75   11.26   0
  10  -2  -2  118.07   10.36   0
 -10   2   1   36.42    7.03   0
  10   2  -1   44.98    8.34   0
 -10  -2   1   43.95    8.62   0
  10  -2  -1   36.67    6.62   0
 -10   2   0  321.55   18.40   0
  10   2   0  255.07   17.42   0
 -10  -2   0  299.94   18.81   0
  10  -2   0  322.13   17.35   0
 -10   2  -1    1.95    3.33   0
  10   2   1    9.64    4.44   0
  10  -2   1    5.71    3.48   0
 -10  -2  -1   10.64    4.76   0
  10   2   2   24.08    6.22   0
 -10   2  -2   27.15    6.14   0
 -10   2  -2   16.43    5.15   0
 -10  -2  -2   27.53    7.01   0
  10  -2   2   34.52    5.75   0
  10   2   3    8.97    4.41   0
 -10   2  -3    3.56    2.89   0
 -10   2  -3   12.67    4.32   0
  10  -2   3    7.19    2.52   0
 -10  -2  -3   12.35    5.32   0
 -10   2  -4  252.27   15.15   0
 -10   2  -4  252.68   14.53   0
  10   2   4  232.15   14.88   0
  10  -2   4  205.10    9.68   0
  10  -2   4  233.37    9.95   0
 -10  -2  -4  209.59   15.93   0
 -10   2  -5  172.62   11.96   0
 -10   2  -5  148.44   11.89   0
  10   2   5  159.02   11.93   0
 -10  -2  -5  146.11   15.87   0
 -10   2  -6    7.53    3.55   0
  10   2   6   -0.90    2.56   0
 -10   2  -6    6.75    3.79   0
 -10  -2  -6   -0.94    3.43   0
  10   2   7   42.19    7.02   0
 -10   2  -7   55.65    8.59   0
 -10   2  -7   43.54    7.67   0
 -10  -2  -7   47.59    9.67   0
 -10   2  -8    4.51    3.45   0
 -10  -2  -8   -1.58    3.63   0
 -10   2  -9    6.88    4.18   0
 -10  -2  -9    3.00    4.42   0
 -10   2 -10   19.93    5.69   0
 -10  -2 -10   27.45    8.10   0
 -10   2 -11    3.47    3.99   0
 -10  -2 -11    0.18    5.02   0
 -10   2 -12    5.88    4.70   0
 -10  -2 -12   -1.13    5.28   0
 -10   2 -13    0.06    4.09   0
 -10  -2 -13   -4.18    5.09   0
  10   3 -16    4.65    6.22   0
  10  -3 -16    9.89    7.88   0
  10   3 -15   -2.81    5.23   0
  10  -3 -15   -4.41    5.02   0
  10   3 -14    6.10    6.37   0
  10  -3 -14    1.92    5.54   0
  10   3 -13    8.18    5.85   0
 -10   3  13    7.15    5.44   0
  10  -3 -13    4.69    5.70   0
  10   3 -12   -2.42    3.55   0
 -10   3  12    1.67    4.28   0
  10  -3 -12    4.76    4.56   0
  10   3 -11    8.74    5.75   0
 -10   3  11    7.64    5.48   0
  10  -3 -11    7.21    5.41   0
  10   3 -10   13.54    6.45   0
 -10   3  10   15.25    6.50   0
  10  -3 -10   23.85    8.35   0
 -10  -3  10   19.60    5.50   0
 -10   3   9  279.73   20.04   0
  10   3  -9  257.32   18.75   0
  10  -3  -9  229.52   18.86   0
 -10  -3   9  243.46   16.24   0
 -10   3   8  241.79   18.88   0
  10   3  -8  263.99   18.69   0
 -10  -3   8  273.26   17.22   0
  10  -3  -8  210.06   17.72   0
 -10   3   7   82.66   12.60   0
  10   3  -7   67.71   10.96   0
  10  -3  -7   82.38   12.12   0
 -10  -3   7   72.24   10.44   0
 -10   3   6   30.97    7.86   0
  10   3  -6   38.22    8.65   0
  10  -3  -6   33.89    7.82   0
 -10  -3   6   35.70    7.47   0
  10   3  -5    8.09    4.60   0
 -10   3   5    8.67    4.73   0
 -10  -3   5    4.07    3.94   0
  10  -3  -5    8.75    4.92   0
  10   3  -4   25.46    6.85   0
 -10   3   4   37.67    8.17   0
  10  -3  -4   21.61    6.34   0
 -10  -3   4   27.08    6.72   0
  10   3  -3    5.09    4.45   0
 -10   3   3   -2.68    2.36   0
  10  -3  -3    7.75    4.84   0
 -10  -3   3    4.53    3.49   0
  10   3  -2   78.06   10.83   0
 -10   3   2   91.81   12.08   0
  10  -3  -2   87.55   10.96   0
 -10  -3   2  104.19   13.52   0
 -10   3   1   35.95    7.24   0
  10   3  -1   53.58    9.09   0
 -10  -3   1   51.63    9.18   0
  10  -3  -1   48.41    7.81   0
  10   3   0   -4.10    2.65   0
 -10   3   0    3.03    3.63   0
 -10  -3   0   -2.75    2.32   0
  10  -3   0   -0.71    2.30   0
 -10   3  -1   32.80    6.87   0
  10   3   1   35.26    7.26   0
 -10  -3  -1   38.59    8.42   0
  10  -3   1   31.98    5.70   0
 -10   3  -2   73.09    9.97   0
  10   3   2   98.91   12.11   0
 -10   3  -2   64.48    8.87   0
  10  -3   2   60.11    7.17   0
 -10  -3  -2   85.60   12.58   0
 -10   3  -3   13.99    4.40   0
  10   3   3    7.25    4.30   0
 -10   3  -3   24.38    5.83   0
  10  -3   3    7.98    2.44   0
 -10  -3  -3    6.70    4.76   0
  10   3   4   16.90    5.65   0
 -10   3  -4    9.94    4.07   0
 -10   3  -4   18.22    5.38   0
 -10  -3  -4   15.09    6.11   0
  10   3   5   56.59    9.20   0
 -10   3  -5   64.98    9.25   0
 -10   3  -5   66.83    8.89   0
 -10  -3  -5   78.55   12.25   0
 -10   3  -6  115.06    9.52   0
 -10   3  -6   87.64   10.27   0
  10   3   6  122.06   13.71   0
 -10  -3  -6  123.96   15.26   0
  10   3   7   23.96    6.25   0
 -10   3  -7   19.85    4.93   0
 -10  -3  -7   13.37    6.61   0
 -10   3  -8    1.14    2.89   0
 -10  -3  -8    6.41    5.49   0
 -10   3  -9   33.01    6.56   0
 -10  -3  -9   50.70   11.02   0
 -10   3 -10    0.74    3.40   0
 -10  -3 -10   -2.84    3.80   0
 -10   3 -11    4.80    3.51   0
 -10  -3 -11    2.77    5.23   0
 -10   3 -12   -4.15    3.04   0
 -10  -3 -12    1.64    5.97   0
  10   4 -15    2.30    6.82   0
  10  -4 -15   -1.98    5.08   0
  10   4 -14    6.78    6.19   0
  10  -4 -14    9.00    6.53   0
  10   4 -13   -2.28    4.14   0
 -10   4  13   -3.76    5.07   0
  10  -4 -13    0.37    5.29   0
  10   4 -12   -0.68    4.69   0
 -10   4  12   -1.33    4.31   0
  10  -4 -12    1.54    4.67   0
  10   4 -11    6.49    5.47   0
 -10   4  11   -3.36    4.75   0
  10  -4 -11    1.77    5.33   0
 -10   4  10   11.93    7.15   0
  10   4 -10   -1.82    4.55   0
  10  -4 -10   11.04    6.21   0
  10   4  -9   11.35    5.51   0
 -10   4   9    1.22    4.36   0
 -10  -4   9    5.59    4.19   0
  10  -4  -9   16.27    7.05   0
 -10   4   8  115.97   15.42   0
  10   4  -8  112.93   14.53   0
  10  -4  -8  120.38   15.68   0
 -10  -4   8  106.76   12.79   0
  10   4  -7   90.54   13.10   0
 -10   4   7   73.65   12.78   0
  10  -4  -7   69.28   11.96   0
 -10  -4   7   81.41   10.95   0
  10   4  -6   35.17    8.84   0
 -10   4   6   23.75    7.67   0
  10  -4  -6   38.60    8.88   0
 -10  -4   6   26.40    6.84   0
 -10   4   5    5.94    4.17   0
  10   4  -5    4.43    4.61   0
 -10  -4   5    8.16    4.93   0
  10  -4  -5    1.03    3.15   0
 -10   4   4    8.15    5.25   0
  10   4  -4   10.14    5.00   0
  10  -4  -4   13.48    5.43   0
 -10  -4   4   12.83    5.26   0
  10   4  -3    7.29    4.56   0
 -10   4   3    3.47    4.19   0
  10  -4  -3    3.70    3.43   0
 -10  -4   3    7.32    4.92   0
 -10   4   2   15.71    5.72   0
  10   4  -2   18.41    6.19   0
 -10  -4   2    7.92    5.03   0
  10  -4  -2   12.30    4.79   0
  10   4  -1    0.89    3.50   0
 -10   4   1   14.06    5.57   0
  10  -4  -1    7.09    4.10   0
 -10  -4   1    4.72    4.20   0
 -10   4   0   39.92    8.24   0
  10   4   0   40.52    8.73   0
  10  -4   0   41.36    7.27   0
 -10  -4   0   41.04    8.38   0
 -10   4  -1   31.29    7.16   0
  10   4   1   28.30    7.11   0
 -10  -4  -1   34.84    8.75   0
  10  -4   1   43.33    6.55   0
  10   4   2   11.45    5.34   0
 -10   4  -2   10.74    4.82   0
 -10  -4  -2    6.30    4.85   0
  10  -4   2   13.76    3.52   0
  10   4   3    4.44    3.85   0
 -10   4  -3    0.46    2.94   0
 -10   4  -3    2.46    3.32   0
  10  -4   3    4.82    1.74   0
  10  -4   3    2.93    1.64   0
 -10  -4  -3    4.60    3.92   0
 -10   4  -4   57.77    8.69   0
 -10   4  -4   41.24    6.81   0
  10   4   4   44.49    9.22   0
 -10  -4  -4   40.65    9.11   0
 -10   4  -5    1.67    3.08   0
 -10   4  -5    6.85    3.34   0
  10   4   5    0.82    3.21   0
 -10  -4  -5    7.88    4.98   0
 -10   4  -6  124.49   10.52   0
  10   4   6  122.24   14.30   0
 -10  -4  -6  112.78   15.98   0
 -10   4  -7   10.34    4.32   0
  10   4   7    6.39    4.49   0
 -10  -4  -7    2.15    5.37   0
 -10   4  -8   -1.13    2.79   0
  10   4   8    1.19    5.90   0
 -10  -4  -8   -1.61    4.60   0
 -10   4  -9    1.43    2.86   0
 -10  -4  -9    2.52    6.10   0
 -10   4 -10   50.85    7.39   0
 -10  -4 -10   40.41   10.66   0
 -10   4 -11   -4.46    2.89   0
 -10  -4 -11    0.99    6.53   0
 -10  -4 -12   -0.91    5.46   0
  10   5 -14   -2.81    4.85   0
  10  -5 -14   -1.39    5.35   0
  10   5 -13   -2.36    4.56   0
 -10   5  13    4.83    6.29   0
  10  -5 -13    3.40    6.35   0
 -10   5  12   -2.33    5.74   0
  10   5 -12    2.93    4.45   0
  10  -5 -12   -2.03    4.00   0
  10   5 -11    6.29    6.02   0
 -10   5  11   -2.71    4.58   0
  10  -5 -11    4.10    5.67   0
 -10   5  10   30.67    9.87   0
  10   5 -10   45.58   10.28   0
  10  -5 -10   42.25   11.05   0
 -10   5   9   47.23   11.04   0
  10   5  -9   37.19    9.10   0
  10  -5  -9   47.00   10.65   0
 -10  -5   9   64.51   11.78   0
 -10   5   8    6.75    6.63   0
  10   5  -8    2.27    4.81   0
 -10  -5   8    8.56    4.68   0
  10  -5  -8    3.27    5.15   0
 -10   5   7   24.40    8.16   0
  10   5  -7   42.56    9.59   0
 -10  -5   7   38.89    8.02   0
  10  -5  -7   31.37    8.68   0
 -10   5   6   -2.83    3.38   0
  10   5  -6   -2.04    4.05   0
  10  -5  -6    2.45    4.54   0
 -10  -5   6    4.17    3.89   0
  10   5  -5   11.85    5.31   0
 -10   5   5    4.78    4.35   0
 -10  -5   5    5.47    4.18   0
  10  -5  -5    5.44    4.41   0
 -10   5   4    0.24    3.96   0
  10   5  -4    4.78    4.74   0
 -10  -5   4   -0.41    3.70   0
  10  -5  -4    1.33    3.67   0
  10   5  -3  127.91   15.55   0
 -10   5   3  118.11   15.08   0
  10  -5  -3  132.75   15.19   0
 -10  -5   3  136.42   15.55   0
 -10   5   2    2.71    3.84   0
  10   5  -2    2.87    4.18   0
 -10  -5   2   -2.55    3.76   0
  10  -5  -2    4.93    4.02   0
 -10   5   1   44.93    9.80   0
  10   5  -1   47.85    9.48   0
  10  -5  -1   59.18    9.29   0
 -10  -5   1   21.28    6.74   0
  10   5   0    5.41    4.62   0
 -10   5   0    1.69    3.93   0
  10  -5   0   -0.98    2.33   0
 -10  -5   0    0.13    3.49   0
 -10   5  -1  105.81   13.19   0
  10   5   1  168.65   17.70   0
 -10  -5  -1  150.53   17.29   0
  10  -5   1  124.67    9.63   0
  10   5   2   57.77   10.70   0
 -10   5  -2   32.24    7.24   0
  10  -5   2   45.90    5.70   0
 -10  -5  -2   38.16    9.31   0
  10   5   3    1.30    3.45   0
 -10   5  -3   -1.38    3.14   0
 -10  -5  -3    7.72    5.53   0
  10   5   4   27.97    8.09   0
 -10   5  -4   24.97    6.35   0
 -10   5  -4   21.04    7.62   0
 -10  -5  -4   34.44    9.42   0
  10   5   5   14.96    6.49   0
 -10   5  -5   15.14    5.12   0
 -10  -5  -5   14.82    7.05   0
 -10   5  -6   23.35    5.84   0
  10   5   6   22.20    6.91   0
 -10  -5  -6   39.86   10.95   0
  10   5   7    9.83    4.75   0
 -10   5  -7    1.57    3.07   0
 -10  -5  -7    0.61    5.41   0
  10   5   8    5.74    4.05   0
 -10   5  -8    8.85    4.31   0
 -10  -5  -8    0.82    5.07   0
 -10   5  -9   30.38    6.25   0
 -10  -5  -9   23.49    9.64   0
 -10   5 -10    9.34    4.35   0
 -10  -5 -10    8.10    6.65   0
 -10  -5 -11   -2.58    5.28   0
  10   6 -13    8.10    6.70   0
 -10   6  13   11.05    7.79   0
  10  -6 -13   -1.39    5.90   0
  10   6 -12    4.48    6.18   0
 -10   6  12    4.00    7.04   0
  10  -6 -12    4.02    6.44   0
  10   6 -11    5.86    6.76   0
 -10   6  11    5.48    6.85   0
  10  -6 -11   19.91    9.07   0
  10   6 -10    8.98    6.73   0
 -10   6  10    7.85    7.35   0
  10  -6 -10   10.09    7.46   0
 -10   6   9    5.35    5.96   0
  10   6  -9   -0.57    5.18   0
  10  -6  -9    5.64    5.82   0
 -10   6   8   10.62    6.72   0
  10   6  -8    5.38    5.33   0
  10  -6  -8   15.48    7.67   0
 -10   6   7   10.81    7.14   0
  10   6  -7   14.95    7.02   0
 -10  -6   7   12.31    5.49   0
  10  -6  -7   15.24    7.15   0
  10   6  -6    4.72    4.76   0
 -10   6   6    5.20    5.16   0
 -10  -6   6    2.87    4.25   0
  10  -6  -6    6.21    5.64   0
  10   6  -5   32.21    8.73   0
 -10   6   5   10.31    5.87   0
  10  -6  -5   17.73    7.12   0
 -10  -6   5   16.47    6.34   0
 -10   6   4   38.16    9.49   0
  10   6  -4   54.37   11.06   0
 -10  -6   4   46.49    9.37   0
  10  -6  -4   53.23   10.49   0
  10   6  -3   -0.06    4.07   0
 -10   6   3   -3.43    2.96   0
 -10  -6   3    8.42    5.30   0
  10  -6  -3    1.93    4.15   0
  10   6  -2    2.49    4.51   0
 -10   6   2   -3.12    2.83   0
  10  -6  -2    0.09    3.37   0
 -10  -6   2   -2.34    3.39   0
 -10   6   1   37.25    8.79   0
  10   6  -1   25.83    7.80   0
 -10  -6   1   47.13   10.23   0
  10  -6  -1   36.33    7.91   0
  10   6   0   89.05   13.96   0
 -10   6   0   64.33   11.09   0
  10  -6   0   76.54    9.93   0
 -10  -6   0   78.86   13.31   0
  10   6   1    0.20    4.40   0
 -10   6  -1    1.46    4.25   0
  10  -6   1    0.31    2.49   0
 -10  -6  -1    1.61    4.79   0
  10   6   2    4.28    4.74   0
 -10   6  -2    3.58    4.24   0
 -10  -6  -2    7.09    5.67   0
  10   6   3    1.54    4.80   0
 -10   6  -3   10.66    5.12   0
 -10  -6  -3   14.85    7.26   0
 -10   6  -4   20.13    6.27   0
  10   6   4   11.61    6.16   0
 -10  -6  -4   19.40    7.57   0
  10   6   5    3.97    5.30   0
 -10   6  -5    5.14    3.96   0
 -10  -6  -5    2.99    5.67   0
 -10   6  -6   -1.20    2.98   0
  10   6   6   -2.06    3.61   0
 -10  -6  -6   -0.59    4.85   0
  10   6   7   33.23    8.85   0
 -10   6  -7   32.32    7.06   0
 -10  -6  -7   38.13   10.77   0
  10   6   8    5.92    5.35   0
 -10   6  -8   10.84    4.85   0
 -10  -6  -8    2.64    6.14   0
 -10   6  -9    8.79    4.41   0
 -10  -6  -9    5.70    7.82   0
 -10  -6 -10    0.88    6.30   0
  10   7 -12    7.94    7.70   0
 -10   7  12    5.57    7.96   0
  10  -7 -12   -1.74    5.01   0
  10   7 -11    2.39    6.56   0
 -10   7  11   17.93    9.52   0
  10  -7 -11    8.85    8.20   0
 -10   7  10    4.45    6.93   0
  10   7 -10   11.05    7.92   0
  10  -7 -10   13.16    7.66   0
  10   7  -9    9.03    6.44   0
 -10   7   9    3.28    6.66   0
  10  -7  -9   13.94    7.24   0
 -10   7   8    6.76    6.15   0
  10   7  -8   28.37    8.98   0
  10  -7  -8   20.58    9.09   0
 -10   7   7   -5.19    3.94   0
  10   7  -7   -0.90    4.19   0
  10  -7  -7    7.33    6.45   0
 -10   7   6   -1.96    4.12   0
  10   7  -6    1.02    5.30   0
 -10  -7   6    3.85    4.58   0
  10  -7  -6   -0.52    4.91   0
 -10   7   5    1.01    4.80   0
  10   7  -5    5.28    5.68   0
 -10  -7   5    6.92    4.98   0
  10  -7  -5   10.89    5.85   0
 -10   7   4   70.04   13.39   0
  10   7  -4   94.18   14.91   0
 -10  -7   4   74.30   12.45   0
  10  -7  -4   54.79   11.21   0
 -10   7   3    0.32    4.88   0
  10   7  -3    0.33    4.68   0
 -10  -7   3   -0.96    4.38   0
  10  -7  -3    3.44    4.25   0
  10   7  -2    4.24    5.86   0
 -10   7   2    1.33    4.53   0
 -10  -7   2    3.32    5.14   0
  10  -7  -2    1.36    3.34   0
 -10   7   1   19.89    7.70   0
  10   7  -1    6.61    6.01   0
 -10  -7   1   11.47    6.74   0
  10  -7  -1    8.44    4.77   0
  10   7   0   15.92    7.94   0
 -10   7   0   28.85    8.33   0
 -10  -7   0   34.65    9.69   0
  10  -7   0   25.77    6.55   0
  10   7   1   70.93   13.57   0
 -10   7  -1   36.26    8.46   0
 -10  -7  -1   57.26   12.46   0
 -10   7  -2   26.60    7.68   0
  10   7   2   19.95    7.51   0
 -10  -7  -2   31.90    9.79   0
 -10   7  -3   39.32    9.02   0
  10   7   3   36.62   10.65   0
 -10  -7  -3   41.10   10.73   0
  10   7   4    1.00    5.33   0
 -10   7  -4    3.88    4.37   0
 -10  -7  -4   -0.83    4.82   0
  10   7   5    0.80    5.46   0
 -10   7  -5    3.78    4.46   0
 -10  -7  -5    3.28    5.72   0
 -10   7  -6   27.57    7.22   0
  10   7   6   17.13    7.99   0
 -10  -7  -6   12.91    7.47   0
 -10   7  -7    1.93    4.10   0
  10   7   7   -0.45    4.47   0
 -10  -7  -7   -6.56    4.35   0
 -10   7  -8   10.17    4.66   0
  10   7   8    7.95    6.05   0
 -10  -7  -8   17.92    8.44   0
 -10   7  -9   21.42    6.07   0
 -10  -7  -9   14.66    8.33   0
 -10   8  11    2.93    7.61   0
  10   8 -11   12.80    8.30   0
  10  -8 -11   -3.48    5.65   0
  10   8 -10   33.24   10.18   0
 -10   8  10   33.02   10.91   0
  10  -8 -10   22.74   10.90   0
 -10   8   9   14.72    8.44   0
  10   8  -9   15.63    9.12   0
  10  -8  -9   13.19    7.83   0
 -10   8   8    4.28    6.97   0
  10   8  -8    9.18    6.84   0
  10  -8  -8   -1.35    4.75   0
 -10   8   7   14.13    8.07   0
  10   8  -7    7.84    7.60   0
  10  -8  -7    7.95    6.84   0
  10   8  -6   20.77    9.02   0
[truncated: 322,799 more chars]
