# Supplementary material
Source: MDPI journal article supplement (https://www.mdpi.com/2304-6740/5/1/13)
Supplement: s1 [file s1 › inorganics-05-00013-supplementary/Complex_2_SR629_CIFfile.cif]

data_SR629
_audit_creation_method	'Created with CONVERT.DLL (www.crystalimpact.com)'
_audit_creation_date	2017-01-26
_audit_update_record	2017-01-26
_chemical_formula_sum	'C48 H64 F24 K4 N4 O4'
_chemical_compound_source
;
synthesis as described
;
_chemical_formula_weight	1373.430
_refine_ls_R_factor_all	0.063
_cell_length_a	13.9764(4)
_cell_length_b	14.1787(4)
_cell_length_c	16.1077(4)
_cell_angle_alpha	84.831(1)
_cell_angle_beta	81.560(1)
_cell_angle_gamma	80.187(1)
_cell_volume	3104.3(2)
_cell_formula_units_Z	2
_symmetry_int_tables_number	2
_symmetry_space_group_name_H-M	'P -1'
_symmetry_space_group_name_Hall	'-P_1'

loop_
_symmetry_equiv_pos_site_id
_symmetry_equiv_pos_as_xyz
1 x,y,z
2 -x,-y,-z

loop_
_atom_type_symbol
_atom_type_oxidation_number
_atom_type_radius_bond
K	?	?
O	?	?
C	?	?
F	?	?
H	?	?
N	?	?


loop_
_atom_site_label
_atom_site_type_symbol
_atom_site_fract_x
_atom_site_fract_y
_atom_site_fract_z
_atom_site_occupancy
_atom_site_symmetry_multiplicity
_atom_site_Wyckoff_symbol
_atom_site_attached_hydrogens
_atom_site_calc_flag
_atom_site_thermal_displace_type
_atom_site_u_iso_or_equiv
K1 K  0.6251(0)  0.3601(0)  0.2947(0)  1.000 2 i ? d Uani  0.02618(10)
O1 O  0.7950(1)  0.3445(1)  0.3581(1)  1.000 2 i ? d Uani  0.0263(3)
C2 C  0.8247(2)  0.3769(1)  0.4255(1)  1.000 2 i ? d Uani  0.0272(4)
C3 C  0.7579(2)  0.3495(2)  0.5061(1)  1.000 2 i ? d Uani  0.0350(5)
F4 F  0.7719(1)  0.3881(1)  0.5754(1)  1.000 2 i ? d Uani  0.0534(4)
F5 F  0.7708(1)  0.2531(1)  0.5242(1)  1.000 2 i ? d Uani  0.0483(4)
F6 F  0.6632(1)  0.3742(1)  0.4973(1)  1.000 2 i ? d Uani  0.0445(3)
C7 C  0.9306(2)  0.3264(2)  0.4337(1)  1.000 2 i ? d Uani  0.0365(5)
F8 F  0.9654(1)  0.3451(1)  0.5027(1)  1.000 2 i ? d Uani  0.0582(4)
F9 F  0.9421(1)  0.2301(1)  0.4341(1)  1.000 2 i ? d Uani  0.0441(3)
F10 F  0.9920(1)  0.3533(1)  0.3673(1)  1.000 2 i ? d Uani  0.0507(4)
C11 C  0.8305(2)  0.4866(1)  0.4199(1)  1.000 2 i ? d Uani  0.0302(4)
H11A H  0.8737  0.4978  0.4603  1.000 2 i ? calc Uiso  0.03600
H11B H  0.8616  0.5048  0.3628  1.000 2 i ? calc Uiso  0.03600
N12 N  0.7371(1)  0.5496(1)  0.4370(1)  1.000 2 i ? d Uani  0.0292(4)
C13 C  0.7445(2)  0.6437(2)  0.4664(1)  1.000 2 i ? d Uani  0.0407(6)
H13 H  0.6789  0.6845  0.4651  1.000 2 i ? calc Uiso  0.04900
C14 C  0.8189(2)  0.6974(2)  0.4102(2)  1.000 2 i ? d Uani  0.0535(7)
H14A H  0.8852  0.6623  0.4131  1.000 2 i ? calc Uiso  0.08000
H14B H  0.8141  0.7619  0.4296  1.000 2 i ? calc Uiso  0.08000
H14C H  0.8048  0.7025  0.3520  1.000 2 i ? calc Uiso  0.08000
C15 C  0.7636(2)  0.6330(2)  0.5575(2)  1.000 2 i ? d Uani  0.0627(8)
H15A H  0.7131  0.6010  0.5920  1.000 2 i ? calc Uiso  0.09400
H15B H  0.7618  0.6965  0.5777  1.000 2 i ? calc Uiso  0.09400
H15C H  0.8282  0.5944  0.5616  1.000 2 i ? calc Uiso  0.09400
C16 C  0.6786(2)  0.5599(1)  0.3679(1)  1.000 2 i ? d Uani  0.0275(4)
H16A H  0.6990  0.5038  0.3333  1.000 2 i ? calc Uiso  0.03300
H16B H  0.6902  0.6181  0.3316  1.000 2 i ? calc Uiso  0.03300
C17 C  0.5695(2)  0.5676(2)  0.4015(1)  1.000 2 i ? d Uani  0.0359(5)
H17A H  0.5604  0.5140  0.4442  1.000 2 i ? calc Uiso  0.04300
H17B H  0.5483  0.6282  0.4299  1.000 2 i ? calc Uiso  0.04300
C18 C  0.5062(2)  0.5653(2)  0.3367(1)  1.000 2 i ? d Uani  0.0325(5)
C19 C  0.4531(2)  0.5631(2)  0.2867(2)  1.000 2 i ? d Uani  0.0423(6)
C20 C  0.3819(2)  0.5639(3)  0.2283(2)  1.000 2 i ? d Uani  0.0768(11)
H20A H  0.3183  0.5984  0.2516  1.000 2 i ? calc Uiso  0.11500
H20B H  0.3754  0.4978  0.2198  1.000 2 i ? calc Uiso  0.11500
H20C H  0.4045  0.5959  0.1742  1.000 2 i ? calc Uiso  0.11500
K2 K  0.8094(0)  0.1496(0)  0.3686(0)  1.000 2 i ? d Uani  0.0287(1)
O21 O  0.9130(1)  0.1417(1)  0.2127(1)  1.000 2 i ? d Uani  0.0276(3)
C22 C  1.0002(2)  0.1024(2)  0.1708(1)  1.000 2 i ? d Uani  0.0307(5)
C23 C  1.0050(2)  0.1415(2)  0.0774(2)  1.000 2 i ? d Uani  0.0441(6)
F24 F  0.9838(1)  0.2374(1)  0.0680(1)  1.000 2 i ? d Uani  0.0583(4)
F25 F  0.9373(1)  0.1086(1)  0.0407(1)  1.000 2 i ? d Uani  0.0552(4)
F26 F  1.0912(1)  0.1172(1)  0.0298(1)  1.000 2 i ? d Uani  0.0690(5)
C27 C  1.0846(2)  0.1330(2)  0.2084(2)  1.000 2 i ? d Uani  0.0465(6)
F28 F  1.0868(1)  0.2284(1)  0.1927(1)  1.000 2 i ? d Uani  0.0654(5)
F29 F  1.0740(1)  0.1186(1)  0.2919(1)  1.000 2 i ? d Uani  0.0567(4)
F30 F  1.1740(1)  0.0885(1)  0.1789(1)  1.000 2 i ? d Uani  0.0682(5)
C31 C  1.0186(2) -0.0089(2)  0.1663(1)  1.000 2 i ? d Uani  0.0328(5)
H31A H  0.9588 -0.0286  0.1516  1.000 2 i ? calc Uiso  0.03900
H31B H  1.0721 -0.0261  0.1201  1.000 2 i ? calc Uiso  0.03900
N32 N  1.0440(1) -0.0640(1)  0.2432(1)  1.000 2 i ? d Uani  0.0325(4)
C33A C  1.0995(2) -0.1607(2)  0.2276(2)  0.721(4) 2 i ? d Uani  0.0504(7)
H33A H  1.1017 -0.1947  0.2846  0.721(4) 2 i ? calc Uiso  0.06000
C34A C  1.0494(2) -0.2216(2)  0.1800(2)  0.721(4) 2 i ? d Uani  0.0549(7)
H34A H  0.9814 -0.2204  0.2061  0.721(4) 2 i ? calc Uiso  0.08200
H34B H  1.0505 -0.1959  0.1214  0.721(4) 2 i ? calc Uiso  0.08200
H34C H  1.0840 -0.2878  0.1818  0.721(4) 2 i ? calc Uiso  0.08200
C35A C  1.2017(3) -0.1571(3)  0.1942(3)  0.721(4) 2 i ? d Uani  0.0645(11)
H35A H  1.2361 -0.2222  0.1846  0.721(4) 2 i ? calc Uiso  0.09700
H35B H  1.2049 -0.1178  0.1409  0.721(4) 2 i ? calc Uiso  0.09700
H35C H  1.2327 -0.1289  0.2346  0.721(4) 2 i ? calc Uiso  0.09700
C33B C  1.0995(2) -0.1607(2)  0.2276(2)  0.279(4) 2 i ? d Uani  0.0504(7)
H33B H  1.1516 -0.1435  0.1819  0.279(4) 2 i ? calc Uiso  0.06000
C34B C  1.0494(2) -0.2216(2)  0.1800(2)  0.279(4) 2 i ? d Uani  0.0549(7)
H34D H  1.0118 -0.1802  0.1401  0.279(4) 2 i ? calc Uiso  0.08200
H34E H  1.0990 -0.2680  0.1493  0.279(4) 2 i ? calc Uiso  0.08200
H34F H  1.0052 -0.2559  0.2199  0.279(4) 2 i ? calc Uiso  0.08200
C35B C  1.1571(7) -0.2027(7)  0.2875(7)  0.279(4) 2 i ? d Uani  0.0645(11)
H35D H  1.1903 -0.2662  0.2709  0.279(4) 2 i ? calc Uiso  0.09700
H35E H  1.2061 -0.1624  0.2926  0.279(4) 2 i ? calc Uiso  0.09700
H35F H  1.1159 -0.2095  0.3418  0.279(4) 2 i ? calc Uiso  0.09700
C36 C  0.9595(2) -0.0665(2)  0.3077(1)  1.000 2 i ? d Uani  0.0317(5)
H36A H  0.9313 -0.1251  0.3036  1.000 2 i ? calc Uiso  0.03800
H36B H  0.9089 -0.0104  0.2972  1.000 2 i ? calc Uiso  0.03800
C37 C  0.9855(2) -0.0655(3)  0.3957(2)  1.000 2 i ? d Uani  0.0608(8)
H37A H  1.0260 -0.1276  0.4100  1.000 2 i ? calc Uiso  0.07300
H37B H  1.0254 -0.0144  0.3964  1.000 2 i ? calc Uiso  0.07300
C38 C  0.9000(2) -0.0496(2)  0.4599(1)  1.000 2 i ? d Uani  0.0391(5)
C39 C  0.8317(2) -0.0357(2)  0.5118(1)  1.000 2 i ? d Uani  0.0413(5)
C40 C  0.7503(2) -0.0193(3)  0.5805(2)  1.000 2 i ? d Uani  0.0707(9)
H40A H  0.7642 -0.0638  0.6290  1.000 2 i ? calc Uiso  0.10600
H40B H  0.6897 -0.0301  0.5616  1.000 2 i ? calc Uiso  0.10600
H40C H  0.7426  0.0468  0.5967  1.000 2 i ? calc Uiso  0.10600
K3 K  0.8993(0)  0.3414(0)  0.2059(0)  1.000 2 i ? d Uani  0.02865(10)
O41 O  0.7280(1)  0.3666(1)  0.1444(1)  1.000 2 i ? d Uani  0.0263(3)
C42 C  0.6946(1)  0.4103(1)  0.0732(1)  1.000 2 i ? d Uani  0.0243(4)
C43 C  0.5981(2)  0.3754(1)  0.0632(1)  1.000 2 i ? d Uani  0.0292(4)
F44 F  0.6043(1)  0.2793(1)  0.0703(1)  1.000 2 i ? d Uani  0.0406(3)
F45 F  0.5271(1)  0.4078(1)  0.1241(1)  1.000 2 i ? d Uani  0.0436(3)
F46 F  0.5636(1)  0.4040(1) -0.0099(1)  1.000 2 i ? d Uani  0.0405(3)
C47 C  0.7703(2)  0.3807(2) -0.0032(1)  1.000 2 i ? d Uani  0.0316(5)
F48 F  0.7509(1)  0.4265(1) -0.0769(1)  1.000 2 i ? d Uani  0.0442(3)
F49 F  0.8600(1)  0.3933(1)  0.0071(1)  1.000 2 i ? d Uani  0.0400(3)
F50 F  0.7778(1)  0.2856(1) -0.0140(1)  1.000 2 i ? d Uani  0.0436(3)
C51 C  0.6670(2)  0.5222(1)  0.0706(1)  1.000 2 i ? d Uani  0.0281(4)
H51A H  0.6224  0.5430  0.0278  1.000 2 i ? calc Uiso  0.03400
H51B H  0.6305  0.5404  0.1258  1.000 2 i ? calc Uiso  0.03400
N52 N  0.7496(1)  0.5744(1)  0.0517(1)  1.000 2 i ? d Uani  0.0314(4)
C53 C  0.7233(2)  0.6720(2)  0.0122(2)  1.000 2 i ? d Uani  0.0496(7)
H53 H  0.7791  0.7068  0.0151  1.000 2 i ? calc Uiso  0.05900
C54 C  0.6316(2)  0.7310(2)  0.0573(2)  1.000 2 i ? d Uani  0.0647(9)
H54A H  0.5733  0.7075  0.0456  1.000 2 i ? calc Uiso  0.09700
H54B H  0.6286  0.7986  0.0372  1.000 2 i ? calc Uiso  0.09700
H54C H  0.6343  0.7245  0.1180  1.000 2 i ? calc Uiso  0.09700
C55 C  0.7161(3)  0.6676(2) -0.0808(2)  1.000 2 i ? d Uani  0.0690(9)
H55A H  0.7776  0.6331 -0.1085  1.000 2 i ? calc Uiso  0.10300
H55B H  0.7041  0.7329 -0.1070  1.000 2 i ? calc Uiso  0.10300
H55C H  0.6620  0.6340 -0.0867  1.000 2 i ? calc Uiso  0.10300
C56 C  0.8023(2)  0.5738(2)  0.1235(1)  1.000 2 i ? d Uani  0.0324(5)
H56A H  0.7937  0.5160  0.1614  1.000 2 i ? calc Uiso  0.03900
H56B H  0.7749  0.6310  0.1554  1.000 2 i ? calc Uiso  0.03900
C57 C  0.9114(2)  0.5739(2)  0.0946(2)  1.000 2 i ? d Uani  0.0488(6)
H57A H  0.9339  0.5274  0.0508  1.000 2 i ? calc Uiso  0.05900
H57B H  0.9203  0.6383  0.0684  1.000 2 i ? calc Uiso  0.05900
C58 C  0.9732(2)  0.5498(2)  0.1621(2)  1.000 2 i ? d Uani  0.0437(6)
C59 C  1.0258(2)  0.5321(3)  0.2139(2)  1.000 2 i ? d Uani  0.0765(8)
C60 C  1.0947(2)  0.5176(2)  0.2759(2)  1.000 2 i ? d Uani  0.0765(8)
H60A H  1.1402  0.5640  0.2628  1.000 2 i ? calc Uiso  0.11500
H60B H  1.1316  0.4523  0.2742  1.000 2 i ? calc Uiso  0.11500
H60C H  1.0584  0.5267  0.3322  1.000 2 i ? calc Uiso  0.11500
K4 K  0.7444(0)  0.1656(0)  0.146()  1.000 2 i ? d Uani  0.02869(10)
O61 O  0.6477(1)  0.1650(1)  0.2997(1)  1.000 2 i ? d Uani  0.0269(3)
C62 C  0.5629(2)  0.1331(1)  0.3313(1)  1.000 2 i ? d Uani  0.0271(4)
C63 C  0.5311(2)  0.1662(2)  0.4219(1)  1.000 2 i ? d Uani  0.0352(5)
F64 F  0.4477(1)  0.1391(1)  0.4614(1)  1.000 2 i ? d Uani  0.0490(4)
F65 F  0.5192(1)  0.2619(1)  0.4260(1)  1.000 2 i ? d Uani  0.0454(3)
F66 F  0.6010(1)  0.1300(1)  0.4702(1)  1.000 2 i ? d Uani  0.0499(4)
C67 C  0.4825(2)  0.1786(2)  0.2768(1)  1.000 2 i ? d Uani  0.0327(5)
F68 F  0.4666(1)  0.2756(1)  0.2756(1)  1.000 2 i ? d Uani  0.0423(3)
F69 F  0.3945(1)  0.1523(1)  0.3019(1)  1.000 2 i ? d Uani  0.0483(3)
F70 F  0.5076(1)  0.1580(1)  0.1966(1)  1.000 2 i ? d Uani  0.0424(3)
C71 C  0.5668(2)  0.0220(1)  0.3408(1)  1.000 2 i ? d Uani  0.0311(5)
H71A H  0.6103 -0.0052  0.3832  1.000 2 i ? calc Uiso  0.03700
H71B H  0.5003  0.0078  0.3623  1.000 2 i ? calc Uiso  0.03700
N72 N  0.6016(1) -0.0255(1)  0.2627(1)  1.000 2 i ? d Uani  0.0291(4)
C73 C  0.5482(2) -0.1037(2)  0.2509(1)  1.000 2 i ? d Uani  0.0359(5)
H73 H  0.5822 -0.1341  0.1985  1.000 2 i ? calc Uiso  0.04300
C74 C  0.5497(3) -0.1828(2)  0.3205(2)  1.000 2 i ? d Uani  0.0656(9)
H74A H  0.6174 -0.2056  0.3309  1.000 2 i ? calc Uiso  0.09800
H74B H  0.5219 -0.2360  0.3038  1.000 2 i ? calc Uiso  0.09800
H74C H  0.5108 -0.1580  0.3720  1.000 2 i ? calc Uiso  0.09800
C75 C  0.4448(2) -0.0649(2)  0.2349(2)  1.000 2 i ? d Uani  0.0539(7)
H75A H  0.4067 -0.0393  0.2863  1.000 2 i ? calc Uiso  0.08100
H75B H  0.4147 -0.1166  0.2181  1.000 2 i ? calc Uiso  0.08100
H75C H  0.4456 -0.0137  0.1898  1.000 2 i ? calc Uiso  0.08100
C76 C  0.7075(2) -0.0555(2)  0.2535(2)  1.000 2 i ? d Uani  0.0401(5)
H76A H  0.7236 -0.1063  0.2979  1.000 2 i ? calc Uiso  0.04800
H76B H  0.7389 -0.0002  0.2622  1.000 2 i ? calc Uiso  0.04800
C77 C  0.7506(2) -0.0933(2)  0.1677(2)  1.000 2 i ? d Uani  0.0581(8)
H77A H  0.8227 -0.0964  0.1606  1.000 2 i ? calc Uiso  0.07000
H77B H  0.7369 -0.1593  0.1666  1.000 2 i ? calc Uiso  0.07000
C78 C  0.7111(2) -0.0332(2)  0.0954(2)  1.000 2 i ? d Uani  0.0621(9)
C79 C  0.6759(4)  0.0121(3)  0.0414(2)  1.000 2 i ? d Uani  0.1068(12)
C80 C  0.6261(4)  0.0675(3) -0.0248(2)  1.000 2 i ? d Uani  0.1068(12)
H80A H  0.6279  0.0269 -0.0713  1.000 2 i ? calc Uiso  0.16000
H80B H  0.6591  0.1225 -0.0452  1.000 2 i ? calc Uiso  0.16000
H80C H  0.5579  0.0905 -0.0024  1.000 2 i ? calc Uiso  0.16000


loop_
_atom_site_aniso_label
_atom_site_aniso_U_11
_atom_site_aniso_U_22
_atom_site_aniso_U_33
_atom_site_aniso_U_12
_atom_site_aniso_U_13
_atom_site_aniso_U_23
K1  0.0262(2)  0.0231(2)  0.0298(2) -0.00508(17) -0.00231(17) -0.00490(16)
O1  0.0283(8)  0.0259(7)  0.0262(7) -0.0037(6) -0.0079(6) -0.0042(5)
C2  0.0271(11)  0.028(1)  0.0276(10) -0.0045(8) -0.0076(8) -0.0016(8)
C3  0.0451(14)  0.0318(12)  0.0288(10) -0.0081(10) -0.0052(10) -0.0022(9)
F4  0.0796(11)  0.0576(9)  0.0266(6) -0.0181(8) -0.0069(7) -0.0078(6)
F5  0.0675(10)  0.0360(7)  0.0396(7) -0.0125(7) -0.0023(7)  0.0070(6)
F6  0.0374(8)  0.0474(8)  0.0464(8) -0.0103(6)  0.0073(6) -0.0055(6)
C7  0.0367(13)  0.0302(12)  0.0452(13) -0.0043(9) -0.017(1) -0.0004(9)
F8  0.0575(10)  0.0556(9)  0.0707(10) -0.0006(7) -0.0457(8) -0.0090(7)
F9  0.0397(8)  0.0317(7)  0.0626(9)  0.0013(6) -0.0225(7)  0.0012(6)
F10  0.0274(7)  0.0480(8)  0.0727(10) -0.0023(6) -0.0028(7)  0.0041(7)
C11  0.0314(11)  0.0288(11)  0.0340(11) -0.0078(9) -0.0119(9) -0.0031(8)
N12  0.0307(10)  0.0271(9)  0.0323(9) -0.0027(7) -0.0119(7) -0.0068(7)
C13  0.0489(15)  0.0303(12)  0.0478(13) -0.0002(10) -0.0230(11) -0.0132(10)
C14  0.0563(17)  0.0316(13)  0.0820(19) -0.0129(12) -0.0336(15) -0.0038(12)
C15  0.084(2)  0.0556(17)  0.0559(16)  0.0025(15) -0.0349(16) -0.0255(13)
C16  0.0286(11)  0.0259(10)  0.0303(10) -0.0050(8) -0.0088(8) -0.0046(8)
C17  0.0296(12)  0.0445(13)  0.0336(11) -0.0055(10) -0.0041(9) -0.0034(9)
C18  0.0265(11)  0.0308(11)  0.0398(12) -0.0015(9) -0.0026(9) -0.0085(9)
C19  0.0293(12)  0.0486(14)  0.0493(13)  0.0053(10) -0.0085(11) -0.0214(11)
C20  0.0447(17)  0.115(3)  0.073(2)  0.0201(17) -0.0290(15) -0.0506(19)
K2  0.0305(2)  0.0243(2)  0.0310(2) -0.00281(18) -0.00501(18) -0.00216(17)
O21  0.0230(7)  0.0287(7)  0.0282(7)  0.0014(6)  0.0007(6) -0.0030(6)
C22  0.0250(11)  0.0282(11)  0.0355(11)  0.0019(8) -0.0006(9) -0.0015(8)
C23  0.0430(15)  0.0373(13)  0.0407(13)  0.0076(11)  0.0137(11)  0.0003(10)
F24  0.0721(11)  0.0381(8)  0.0476(8)  0.0100(7)  0.0176(7)  0.0104(6)
F25  0.0701(11)  0.0586(9)  0.0301(7)  0.0077(8) -0.0061(7) -0.0015(6)
F26  0.0602(11)  0.0612(10)  0.0623(10)  0.0121(8)  0.0368(8)  0.0064(8)
C27  0.0266(12)  0.0335(13)  0.0782(19)  0.001(1) -0.0065(12) -0.0083(12)
F28  0.0360(8)  0.0355(8)  0.1254(15) -0.0086(6) -0.0102(9) -0.0044(8)
F29  0.0539(9)  0.0483(9)  0.0748(11)  0.0017(7) -0.0339(8) -0.0184(7)
F30  0.0233(8)  0.0515(9)  0.1263(15)  0.0036(7) -0.0050(8) -0.0137(9)
C31  0.0317(12)  0.0304(11)  0.0341(11)  0.0008(9) -0.0014(9) -0.0064(9)
N32  0.0303(10)  0.0269(9)  0.0371(9)  0.0052(7) -0.0048(8) -0.0042(7)
C33A  0.0491(16)  0.0324(13)  0.0646(16)  0.0141(11) -0.0108(13) -0.0095(11)
C34A  0.076(2)  0.0302(13)  0.0543(15) -0.0023(13)  0.0040(14) -0.0121(11)
C35A  0.040(2)  0.053(2)  0.092(3)  0.0160(17) -0.0001(19) -0.013(2)
C33B  0.0491(16)  0.0324(13)  0.0646(16)  0.0141(11) -0.0108(13) -0.0095(11)
C34B  0.076(2)  0.0302(13)  0.0543(15) -0.0023(13)  0.0040(14) -0.0121(11)
C35B  0.040(2)  0.053(2)  0.092(3)  0.0160(17) -0.0001(19) -0.013(2)
C36  0.0328(12)  0.0269(11)  0.0354(11) -0.0022(9) -0.0074(9) -0.0026(8)
C37  0.0395(15)  0.103(2)  0.0379(13)  0.0038(15) -0.0090(11) -0.0162(14)
C38  0.0404(14)  0.0459(14)  0.0334(12) -0.0061(11) -0.0129(11) -0.0037(10)
C39  0.0411(14)  0.0472(14)  0.0371(12) -0.0121(11) -0.0094(11)  0.0051(10)
C40  0.0439(17)  0.114(3)  0.0491(16) -0.0157(17)  0.0022(13)  0.0148(16)
K3  0.0259(2)  0.0277(2)  0.0315(2) -0.00352(18) -0.00316(18) -0.00045(17)
O41  0.0278(8)  0.0270(7)  0.0243(7) -0.0035(6) -0.0065(6)  0.0009(5)
C42  0.0244(10)  0.025(1)  0.0246(9) -0.0063(8) -0.0041(8) -0.0015(7)
C43  0.0284(11)  0.0246(10)  0.0354(11) -0.0042(8) -0.0082(9)  0.0001(8)
F44  0.0382(7)  0.0254(6)  0.0628(8) -0.0101(5) -0.0205(6)  0.0042(6)
F45  0.0271(7)  0.0475(8)  0.0552(8) -0.0095(6)  0.0030(6) -0.0046(6)
F46  0.0419(8)  0.0378(7)  0.0476(7) -0.0109(6) -0.0246(6)  0.0045(6)
C47  0.0342(12)  0.0325(11)  0.0271(10) -0.0032(9) -0.0042(9) -0.0004(8)
F48  0.0495(8)  0.0556(8)  0.0237(6) -0.0026(7) -0.0026(6)  0.0030(5)
F49  0.0249(7)  0.0473(8)  0.0442(7) -0.0031(6)  0.0012(5)  0.0022(6)
F50  0.0527(9)  0.0359(7)  0.0397(7) -0.0016(6)  0.0018(6) -0.0130(6)
C51  0.0270(11)  0.0254(10)  0.033(1) -0.0053(8) -0.0070(8) -0.0016(8)
N52  0.0349(10)  0.0283(9)  0.0339(9) -0.0112(8) -0.0103(8)  0.0030(7)
C53  0.0606(17)  0.0355(13)  0.0614(16) -0.0226(12) -0.0299(13)  0.0137(11)
C54  0.072(2)  0.0257(13)  0.104(2) -0.0016(13) -0.0447(18) -0.0059(14)
C55  0.088(2)  0.069(2)  0.0603(18) -0.0394(18) -0.0347(17)  0.0329(15)
C56  0.0325(12)  0.0318(11)  0.0350(11) -0.0085(9) -0.0080(9) -0.0019(9)
C57  0.0379(14)  0.0691(18)  0.0453(14) -0.0247(13) -0.0083(11)  0.0001(12)
C58  0.0336(13)  0.0413(14)  0.0592(15) -0.0181(11) -0.0075(11)  0.0053(11)
C59  0.0528(13)  0.0879(17)  0.0969(17) -0.0399(12) -0.0379(12)  0.0495(14)
C60  0.0528(13)  0.0879(17)  0.0969(17) -0.0399(12) -0.0379(12)  0.0495(14)
K4  0.0301(2)  0.0266(2)  0.0287(2) -0.00109(18) -0.00430(18) -0.00443(17)
O61  0.0248(7)  0.0246(7)  0.0321(7) -0.0069(6) -0.0007(6) -0.0046(6)
C62  0.0276(11)  0.0271(10)  0.0272(10) -0.0081(8) -0.0005(8) -0.0029(8)
C63  0.0384(13)  0.0355(12)  0.0329(11) -0.0139(10)  0.0021(10) -0.0055(9)
F64  0.0529(9)  0.0580(9)  0.0372(7) -0.0263(7)  0.0148(6) -0.0103(6)
F65  0.0563(9)  0.0360(7)  0.0436(7) -0.0131(6)  0.0095(6) -0.0165(6)
F66  0.0613(10)  0.0587(9)  0.0334(7) -0.0089(7) -0.0145(6) -0.0111(6)
C67  0.0294(11)  0.0305(11)  0.0389(12) -0.0103(9) -0.0017(9)  0.0002(9)
F68  0.0337(7)  0.0298(7)  0.0631(8) -0.0024(5) -0.0102(6)  0.0002(6)
F69  0.0299(7)  0.0549(9)  0.0623(9) -0.0179(6) -0.0083(6)  0.0083(7)
F70  0.0506(8)  0.0441(8)  0.0336(7) -0.0071(6) -0.0126(6)  0.0026(5)
C71  0.0402(13)  0.0275(11)  0.0278(10) -0.0111(9) -0.0066(9)  0.0005(8)
N72  0.0288(9)  0.0269(9)  0.0335(9) -0.0060(7) -0.0057(7) -0.0062(7)
C73  0.0400(13)  0.0333(12)  0.0386(12) -0.013(1) -0.0058(10) -0.0102(9)
C74  0.097(3)  0.0361(15)  0.0741(19) -0.0330(15) -0.0267(18)  0.0049(13)
C75  0.0425(15)  0.0625(18)  0.0650(17) -0.0202(13) -0.0101(13) -0.0210(14)
C76  0.0327(12)  0.0268(11)  0.0637(15) -0.0025(9) -0.0144(11) -0.0092(10)
C77  0.0333(14)  0.0456(16)  0.098(2) -0.0074(12)  0.0054(14) -0.0379(16)
C78  0.0533(18)  0.068(2)  0.0705(19) -0.0371(15)  0.0340(15) -0.0500(17)
C79  0.178(3)  0.119(2)  0.0450(13) -0.082(2) -0.0155(17) -0.0097(14)
C80  0.178(3)  0.119(2)  0.0450(13) -0.082(2) -0.0155(17) -0.0097(14)

loop_
_geom_bond_atom_site_label_1
_geom_bond_atom_site_label_2
_geom_bond_site_symmetry_1
_geom_bond_site_symmetry_2
_geom_bond_distance
_geom_bond_publ_flag
K1 O41 . .  2.6298(13) no
K1 O1 . .  2.6880(14) no
K1 O61 . .  2.7262(14) no
K1 F68 . .  2.7585(14) no
K1 F65 . .  2.8043(14) no
K1 C18 . .  3.172(2) no
K1 F45 . .  3.2152(14) no
K1 C16 . .  3.399(2) no
K1 C19 . .  3.427(2) no
K1 C62 . .  3.455(2) no
K1 C17 . .  3.457(2) no
K1 K4 . .  3.8167(6) no
O1 C2 . .  1.359(2) no
O1 K3 . .  2.6628(14) no
O1 K2 . .  2.7275(14) no
C2 C3 . .  1.545(3) no
C2 C7 . .  1.550(3) no
C2 C11 . .  1.565(3) no
C2 K2 . .  3.479(2) no
C3 F6 . .  1.334(3) no
C3 F4 . .  1.340(2) no
C3 F5 . .  1.358(2) no
F5 K2 . .  2.9529(14) no
C7 F10 . .  1.340(3) no
C7 F8 . .  1.342(2) no
C7 F9 . .  1.347(2) no
F9 K2 . .  2.7144(14) no
F10 K3 . .  3.1002(16) no
C11 N12 . .  1.456(3) no
C11 H11A . .  0.9900 no
C11 H11B . .  0.9900 no
N12 C16 . .  1.458(2) no
N12 C13 . .  1.481(3) no
C13 C15 . .  1.519(3) no
C13 C14 . .  1.532(4) no
C13 H13 . .  1.0000 no
C14 H14A . .  0.9800 no
C14 H14B . .  0.9800 no
C14 H14C . .  0.9800 no
C15 H15A . .  0.9800 no
C15 H15B . .  0.9800 no
C15 H15C . .  0.9800 no
C16 C17 . .  1.531(3) no
C16 H16A . .  0.9900 no
C16 H16B . .  0.9900 no
C17 C18 . .  1.469(3) no
C17 H17A . .  0.9900 no
C17 H17B . .  0.9900 no
C18 C19 . .  1.178(3) no
C19 C20 . .  1.464(3) no
C20 H20A . .  0.9800 no
C20 H20B . .  0.9800 no
C20 H20C . .  0.9800 no
K2 O61 . .  2.6296(14) no
K2 O21 . .  2.7106(13) no
K2 F66 . .  3.1664(16) no
K2 C38 . .  3.213(2) no
K2 C39 . .  3.341(2) no
K2 C36 . .  3.536(2) no
K2 K4 . .  3.8040(6) no
O21 C22 . .  1.359(2) no
O21 K4 . .  2.6876(14) no
O21 K3 . .  2.7979(14) no
C22 C27 . .  1.543(3) no
C22 C23 . .  1.552(3) no
C22 C31 . .  1.561(3) no
C22 K3 . .  3.504(2) no
C23 F26 . .  1.339(3) no
C23 F24 . .  1.342(3) no
C23 F25 . .  1.350(3) no
F24 K3 . .  2.7792(14) no
F25 K4 . .  2.9942(16) no
C27 F29 . .  1.333(3) no
C27 F30 . .  1.340(3) no
C27 F28 . .  1.358(3) no
F28 K3 . .  2.8195(15) no
C31 N32 . .  1.461(3) no
C31 H31A . .  0.9900 no
C31 H31B . .  0.9900 no
N32 C36 . .  1.457(3) no
N32 C33A . .  1.480(3) no
N32 C33B . .  1.480(3) no
C33A C35A . .  1.457(5) no
C33A C34A . .  1.518(4) no
C33A H33A . .  1.0000 no
C34A H34A . .  0.9800 no
C34A H34B . .  0.9800 no
C34A H34C . .  0.9800 no
C35A H35A . .  0.9800 no
C35A H35B . .  0.9800 no
C35A H35C . .  0.9800 no
C33B C35B . .  1.377(11) no
C33B C34B . .  1.518(4) no
C33B H33B . .  1.0000 no
C34B H34D . .  0.9800 no
C34B H34E . .  0.9800 no
C34B H34F . .  0.9800 no
C35B H35D . .  0.9800 no
C35B H35E . .  0.9800 no
C35B H35F . .  0.9800 no
C36 C37 . .  1.516(3) no
C36 H36A . .  0.9900 no
C36 H36B . .  0.9900 no
C37 C38 . .  1.462(4) no
C37 H37A . .  0.9900 no
C37 H37B . .  0.9900 no
C38 C39 . .  1.174(3) no
C39 C40 . .  1.470(4) no
C40 H40A . .  0.9800 no
C40 H40B . .  0.9800 no
C40 H40C . .  0.9800 no
K3 O41 . .  2.6794(14) no
K3 C58 . .  3.278(2) no
K3 F49 . .  3.3239(13) no
K3 C59 . .  3.495(3) no
K3 K4 . .  3.8353(6) no
O41 C42 . .  1.360(2) no
O41 K4 . .  2.8169(14) no
C42 C47 . .  1.539(3) no
C42 C43 . .  1.549(3) no
C42 C51 . .  1.566(3) no
C43 F46 . .  1.341(2) no
C43 F45 . .  1.341(2) no
C43 F44 . .  1.345(2) no
F44 K4 . .  2.6820(13) no
C47 F49 . .  1.332(2) no
C47 F48 . .  1.342(2) no
C47 F50 . .  1.360(2) no
F50 K4 . .  2.9804(14) no
C51 N52 . .  1.455(3) no
C51 H51A . .  0.9900 no
C51 H51B . .  0.9900 no
N52 C56 . .  1.459(3) no
N52 C53 . .  1.481(3) no
C53 C55 . .  1.524(4) no
C53 C54 . .  1.530(4) no
C53 H53 . .  1.0000 no
C54 H54A . .  0.9800 no
C54 H54B . .  0.9800 no
C54 H54C . .  0.9800 no
C55 H55A . .  0.9800 no
C55 H55B . .  0.9800 no
C55 H55C . .  0.9800 no
C56 C57 . .  1.527(3) no
C56 H56A . .  0.9900 no
C56 H56B . .  0.9900 no
C57 C58 . .  1.468(3) no
C57 H57A . .  0.9900 no
C57 H57B . .  0.9900 no
C58 C59 . .  1.174(4) no
C59 C60 . .  1.465(4) no
C60 H60A . .  0.9800 no
C60 H60B . .  0.9800 no
C60 H60C . .  0.9800 no
K4 O61 . .  2.6401(14) no
K4 C78 . .  3.131(3) no
K4 C79 . .  3.216(4) no
K4 F70 . .  3.3078(15) no
K4 C76 . .  3.522(2) no
O61 C62 . .  1.354(2) no
C62 C67 . .  1.545(3) no
C62 C63 . .  1.553(3) no
C62 C71 . .  1.561(3) no
C63 F66 . .  1.343(3) no
C63 F64 . .  1.343(3) no
C63 F65 . .  1.346(2) no
C67 F70 . .  1.333(2) no
C67 F69 . .  1.341(2) no
C67 F68 . .  1.355(2) no
C71 N72 . .  1.461(2) no
C71 H71A . .  0.9900 no
C71 H71B . .  0.9900 no
N72 C76 . .  1.458(3) no
N72 C73 . .  1.479(3) no
C73 C75 . .  1.507(3) no
C73 C74 . .  1.513(3) no
C73 H73 . .  1.0000 no
C74 H74A . .  0.9800 no
C74 H74B . .  0.9800 no
C74 H74C . .  0.9800 no
C75 H75A . .  0.9800 no
C75 H75B . .  0.9800 no
C75 H75C . .  0.9800 no
C76 C77 . .  1.529(4) no
C76 H76A . .  0.9900 no
C76 H76B . .  0.9900 no
C77 C78 . .  1.496(5) no
C77 H77A . .  0.9900 no
C77 H77B . .  0.9900 no
C78 C79 . .  1.152(5) no
C79 C80 . .  1.455(6) no
C80 H80A . .  0.9800 no
C80 H80B . .  0.9800 no
C80 H80C . .  0.9800 no
K2 N32 . .  4.4473(17) no
K2 N72 . .  4.7092(20) no
K1 N72 . .  5.6073(18) no
K1 N12 . .  4.303(2) no
K1 K2 . .  3.8210(6) no
N12 K2 . .  5.7657(18) no
K2 K3 . .  3.8424(6) no
N12 K3 . .  4.9940(17) no
N32 K3 . .  5.7671(17) no
K3 N52 . .  4.3754(17) no
K4 N72 . .  3.8321(18) no
N32 K4 . .  5.1908(17) no
N52 K4 . .  5.8671(18) no

loop_
_geom_angle_atom_site_label_1
_geom_angle_atom_site_label_2
_geom_angle_atom_site_label_3
_geom_angle_site_symmetry_1
_geom_angle_site_symmetry_2
_geom_angle_site_symmetry_3
_geom_angle
_geom_angle_publ_flag
O41 K1 O1 . . . 87.32(4) no
O41 K1 O61 . . . 91.26(4) no
O1 K1 O61 . . . 88.97(4) no
O41 K1 F68 . . . 105.16(4) no
O1 K1 F68 . . . 147.50(4) no
O61 K1 F68 . . . 61.39(4) no
O41 K1 F65 . . . 150.97(4) no
O1 K1 F65 . . . 99.21(4) no
O61 K1 F65 . . . 60.85(4) no
F68 K1 F65 . . . 56.08(4) no
O41 K1 C18 . . . 110.88(5) no
O1 K1 C18 . . . 106.49(5) no
O61 K1 C18 . . . 153.14(5) no
F68 K1 C18 . . . 97.01(5) no
F65 K1 C18 . . . 94.44(5) no
O41 K1 F45 . . . 56.87(4) no
O1 K1 F45 . . . 143.35(4) no
O61 K1 F45 . . . 98.50(4) no
F68 K1 F45 . . . 60.79(4) no
F65 K1 F45 . . . 115.81(4) no
C18 K1 F45 . . . 82.29(5) no
O41 K1 C16 . . . 99.28(5) no
O1 K1 C16 . . . 62.42(4) no
O61 K1 C16 . . . 148.68(5) no
F68 K1 C16 . . . 140.71(5) no
F65 K1 C16 . . . 108.85(4) no
C18 K1 C16 . . . 44.94(5) no
F45 K1 C16 . . . 111.99(4) no
O41 K1 C19 . . . 102.95(5) no
O1 K1 C19 . . . 125.60(5) no
O61 K1 C19 . . . 142.61(5) no
F68 K1 C19 . . . 81.43(5) no
F65 K1 C19 . . . 96.14(5) no
C18 K1 C19 . . . 20.10(5) no
F45 K1 C19 . . . 63.48(5) no
C16 K1 C19 . . . 63.21(5) no
O41 K1 C62 . . . 106.85(4) no
O1 K1 C62 . . . 104.04(5) no
O61 K1 C62 . . . 21.43(4) no
F68 K1 C62 . . . 43.86(4) no
F65 K1 C62 . . . 44.13(4) no
C18 K1 C62 . . . 131.85(5) no
F45 K1 C62 . . . 94.58(4) no
C16 K1 C62 . . . 150.12(5) no
C19 K1 C62 . . . 122.47(6) no
O41 K1 C17 . . . 118.18(5) no
O1 K1 C17 . . . 82.59(5) no
O61 K1 C17 . . . 148.73(5) no
F68 K1 C17 . . . 115.28(5) no
F65 K1 C17 . . . 90.77(5) no
C18 K1 C17 . . . 25.14(5) no
F45 K1 C17 . . . 106.22(4) no
C16 K1 C17 . . . 25.78(5) no
C19 K1 C17 . . . 45.23(5) no
C62 K1 C17 . . . 134.81(5) no
O41 K1 K4 . . . 47.55(3) no
O1 K1 K4 . . . 89.14(3) no
O61 K1 K4 . . . 43.76(3) no
F68 K1 K4 . . . 78.58(3) no
F65 K1 K4 . . . 103.95(3) no
C18 K1 K4 . . . 153.71(4) no
F45 K1 K4 . . . 72.90(3) no
C16 K1 K4 . . . 139.15(4) no
C19 K1 K4 . . . 136.36(4) no
C62 K1 K4 . . . 60.42(3) no
C17 K1 K4 . . . 164.13(4) no
C2 O1 K3 . . . 123.31(12) no
C2 O1 K1 . . . 135.88(12) no
K3 O1 K1 . . . 92.39(4) no
C2 O1 K2 . . . 112.29(11) no
K3 O1 K2 . . . 90.93(4) no
K1 O1 K2 . . . 89.75(4) no
O1 C2 C3 . . . 109.06(17) no
O1 C2 C7 . . . 108.60(16) no
C3 C2 C7 . . . 108.01(17) no
O1 C2 C11 . . . 115.79(16) no
C3 C2 C11 . . . 110.27(16) no
C7 C2 C11 . . . 104.78(17) no
O1 C2 K2 . . . 46.51(9) no
C3 C2 K2 . . . 84.28(11) no
C7 C2 K2 . . . 80.35(11) no
C11 C2 K2 . . . 161.45(12) no
F6 C3 F4 . . . 107.21(18) no
F6 C3 F5 . . . 105.13(18) no
F4 C3 F5 . . . 105.96(17) no
F6 C3 C2 . . . 111.71(17) no
F4 C3 C2 . . . 114.58(18) no
F5 C3 C2 . . . 111.63(17) no
C3 F5 K2 . . . 110.82(11) no
F10 C7 F8 . . . 106.94(19) no
F10 C7 F9 . . . 105.16(18) no
F8 C7 F9 . . . 105.88(17) no
F10 C7 C2 . . . 109.83(17) no
F8 C7 C2 . . . 114.62(19) no
F9 C7 C2 . . . 113.77(18) no
C7 F9 K2 . . . 118.71(12) no
C7 F10 K3 . . . 108.22(12) no
N12 C11 C2 . . . 115.37(17) no
N12 C11 H11A . . . 108.40 no
C2 C11 H11A . . . 108.40 no
N12 C11 H11B . . . 108.40 no
C2 C11 H11B . . . 108.40 no
H11A C11 H11B . . . 107.50 no
C11 N12 C16 . . . 112.97(15) no
C11 N12 C13 . . . 114.35(17) no
C16 N12 C13 . . . 111.82(16) no
N12 C13 C15 . . . 110.49(19) no
N12 C13 C14 . . . 114.14(19) no
C15 C13 C14 . . . 111.7(2) no
N12 C13 H13 . . . 106.70 no
C15 C13 H13 . . . 106.70 no
C14 C13 H13 . . . 106.70 no
C13 C14 H14A . . . 109.50 no
C13 C14 H14B . . . 109.50 no
H14A C14 H14B . . . 109.50 no
C13 C14 H14C . . . 109.50 no
H14A C14 H14C . . . 109.50 no
H14B C14 H14C . . . 109.50 no
C13 C15 H15A . . . 109.50 no
C13 C15 H15B . . . 109.50 no
H15A C15 H15B . . . 109.50 no
C13 C15 H15C . . . 109.50 no
H15A C15 H15C . . . 109.50 no
H15B C15 H15C . . . 109.50 no
N12 C16 C17 . . . 110.64(16) no
N12 C16 K1 . . . 119.21(12) no
C17 C16 K1 . . . 79.23(11) no
N12 C16 H16A . . . 109.50 no
C17 C16 H16A . . . 109.50 no
N12 C16 H16B . . . 109.50 no
C17 C16 H16B . . . 109.50 no
K1 C16 H16B . . . 123.40 no
H16A C16 H16B . . . 108.10 no
C18 C17 C16 . . . 114.29(17) no
C18 C17 K1 . . . 66.49(11) no
C16 C17 K1 . . . 74.99(11) no
C18 C17 H17A . . . 108.70 no
C16 C17 H17A . . . 108.70 no
K1 C17 H17A . . . 73.70 no
C18 C17 H17B . . . 108.70 no
C16 C17 H17B . . . 108.70 no
K1 C17 H17B . . . 175.10 no
H17A C17 H17B . . . 107.60 no
C19 C18 C17 . . . 177.9(2) no
C19 C18 K1 . . . 92.25(15) no
C17 C18 K1 . . . 88.37(13) no
C18 C19 C20 . . . 176.2(2) no
C18 C19 K1 . . . 67.65(14) no
C20 C19 K1 . . . 115.47(17) no
C19 C20 H20A . . . 109.50 no
C19 C20 H20B . . . 109.50 no
H20A C20 H20B . . . 109.50 no
C19 C20 H20C . . . 109.50 no
H20A C20 H20C . . . 109.50 no
H20B C20 H20C . . . 109.50 no
O61 K2 O21 . . . 88.80(4) no
O61 K2 F9 . . . 150.81(4) no
O21 K2 F9 . . . 94.45(4) no
O61 K2 O1 . . . 90.16(4) no
O21 K2 O1 . . . 90.56(4) no
F9 K2 O1 . . . 60.86(4) no
O61 K2 F5 . . . 110.12(4) no
O21 K2 F5 . . . 144.21(4) no
F9 K2 F5 . . . 54.37(4) no
O1 K2 F5 . . . 60.43(4) no
O61 K2 F66 . . . 55.69(4) no
O21 K2 F66 . . . 142.84(4) no
F9 K2 F66 . . . 121.66(4) no
O1 K2 F66 . . . 99.24(4) no
F5 K2 F66 . . . 67.93(4) no
O61 K2 C38 . . . 121.05(5) no
O21 K2 C38 . . . 101.90(5) no
F9 K2 C38 . . . 86.66(5) no
O1 K2 C38 . . . 146.17(5) no
F5 K2 C38 . . . 93.99(5) no
F66 K2 C38 . . . 89.62(5) no
O61 K2 C39 . . . 112.26(5) no
O21 K2 C39 . . . 121.69(5) no
F9 K2 C39 . . . 90.57(5) no
O1 K2 C39 . . . 139.57(5) no
F5 K2 C39 . . . 79.95(5) no
F66 K2 C39 . . . 70.54(5) no
C38 K2 C39 . . . 20.52(6) no
O61 K2 C2 . . . 107.01(4) no
O21 K2 C2 . . . 103.36(5) no
F9 K2 C2 . . . 44.06(4) no
O1 K2 C2 . . . 21.20(4) no
F5 K2 C2 . . . 42.94(4) no
F66 K2 C2 . . . 97.93(4) no
C38 K2 C2 . . . 125.47(5) no
C39 K2 C2 . . . 119.07(5) no
O61 K2 C36 . . . 107.47(5) no
O21 K2 C36 . . . 60.14(4) no
F9 K2 C36 . . . 99.19(5) no
O1 K2 C36 . . . 144.46(5) no
F5 K2 C36 . . . 134.01(4) no
F66 K2 C36 . . . 116.23(5) no
C38 K2 C36 . . . 42.98(5) no
C39 K2 C36 . . . 61.71(6) no
C2 K2 C36 . . . 141.10(5) no
O61 K2 K4 . . . 43.90(3) no
O21 K2 K4 . . . 44.95(3) no
F9 K2 K4 . . . 130.99(3) no
O1 K2 K4 . . . 88.82(3) no
F5 K2 K4 . . . 142.26(3) no
F66 K2 K4 . . . 99.16(3) no
C38 K2 K4 . . . 122.11(4) no
C39 K2 K4 . . . 130.84(4) no
C2 K2 K4 . . . 109.85(3) no
C36 K2 K4 . . . 83.72(3) no
O61 K2 K1 . . . 45.51(3) no
O21 K2 K1 . . . 91.38(3) no
F9 K2 K1 . . . 105.35(3) no
O1 K2 K1 . . . 44.71(3) no
F5 K2 K1 . . . 82.22(3) no
F66 K2 K1 . . . 72.09(3) no
C38 K2 K1 . . . 161.45(5) no
C39 K2 K1 . . . 142.36(5) no
C2 K2 K1 . . . 62.24(3) no
C36 K2 K1 . . . 143.77(4) no
K4 K2 K1 . . . 60.07(1) no
C22 O21 K4 . . . 122.54(12) no
C22 O21 K2 . . . 142.00(12) no
K4 O21 K2 . . . 89.61(4) no
C22 O21 K3 . . . 110.00(12) no
K4 O21 K3 . . . 88.70(4) no
K2 O21 K3 . . . 88.45(4) no
O21 C22 C27 . . . 109.47(17) no
O21 C22 C23 . . . 108.34(16) no
C27 C22 C23 . . . 108.5(2) no
O21 C22 C31 . . . 116.66(18) no
C27 C22 C31 . . . 109.45(17) no
C23 C22 C31 . . . 104.08(17) no
O21 C22 K3 . . . 48.62(9) no
C27 C22 K3 . . . 80.34(12) no
C23 C22 K3 . . . 82.34(11) no
C31 C22 K3 . . . 165.22(14) no
F26 C23 F24 . . . 106.03(19) no
F26 C23 F25 . . . 106.5(2) no
F24 C23 F25 . . . 105.4(2) no
F26 C23 C22 . . . 115.3(2) no
F24 C23 C22 . . . 113.19(19) no
F25 C23 C22 . . . 109.80(19) no
C23 F24 K3 . . . 119.85(12) no
C23 F25 K4 . . . 106.34(12) no
F29 C27 F30 . . . 107.3(2) no
F29 C27 F28 . . . 105.2(2) no
F30 C27 F28 . . . 106.0(2) no
F29 C27 C22 . . . 111.7(2) no
F30 C27 C22 . . . 114.5(2) no
F28 C27 C22 . . . 111.5(2) no
C27 F28 K3 . . . 113.47(13) no
N32 C31 C22 . . . 115.30(17) no
N32 C31 H31A . . . 108.40 no
C22 C31 H31A . . . 108.40 no
N32 C31 H31B . . . 108.40 no
C22 C31 H31B . . . 108.40 no
H31A C31 H31B . . . 107.50 no
C36 N32 C31 . . . 112.41(16) no
C36 N32 C33A . . . 112.44(18) no
C31 N32 C33A . . . 112.86(17) no
C36 N32 C33B . . . 112.44(18) no
C31 N32 C33B . . . 112.86(17) no
C35A C33A N32 . . . 111.7(3) no
C35A C33A C34A . . . 114.4(3) no
N32 C33A C34A . . . 114.7(2) no
C35A C33A H33A . . . 105.00 no
N32 C33A H33A . . . 105.00 no
C34A C33A H33A . . . 105.00 no
C33A C34A H34A . . . 109.50 no
C33A C34A H34B . . . 109.50 no
H34A C34A H34B . . . 109.50 no
C33A C34A H34C . . . 109.50 no
H34A C34A H34C . . . 109.50 no
H34B C34A H34C . . . 109.50 no
C33A C35A H35A . . . 109.50 no
C33A C35A H35B . . . 109.50 no
H35A C35A H35B . . . 109.50 no
C33A C35A H35C . . . 109.50 no
H35A C35A H35C . . . 109.50 no
H35B C35A H35C . . . 109.50 no
C35B C33B N32 . . . 116.4(5) no
C35B C33B C34B . . . 120.5(5) no
N32 C33B C34B . . . 114.7(2) no
C35B C33B H33B . . . 99.80 no
N32 C33B H33B . . . 99.80 no
C34B C33B H33B . . . 99.80 no
C33B C34B H34D . . . 109.50 no
C33B C34B H34E . . . 109.50 no
H34D C34B H34E . . . 109.50 no
C33B C34B H34F . . . 109.50 no
H34D C34B H34F . . . 109.50 no
H34E C34B H34F . . . 109.50 no
C33B C35B H35D . . . 109.50 no
C33B C35B H35E . . . 109.50 no
H35D C35B H35E . . . 109.50 no
C33B C35B H35F . . . 109.50 no
H35D C35B H35F . . . 109.50 no
H35E C35B H35F . . . 109.50 no
N32 C36 C37 . . . 112.45(19) no
N32 C36 K2 . . . 120.03(12) no
C37 C36 K2 . . . 80.70(14) no
N32 C36 H36A . . . 109.10 no
C37 C36 H36A . . . 109.10 no
K2 C36 H36A . . . 121.30 no
N32 C36 H36B . . . 109.10 no
C37 C36 H36B . . . 109.10 no
H36A C36 H36B . . . 107.80 no
C38 C37 C36 . . . 113.5(2) no
C38 C37 H37A . . . 108.90 no
C36 C37 H37A . . . 108.90 no
C38 C37 H37B . . . 108.90 no
C36 C37 H37B . . . 108.90 no
H37A C37 H37B . . . 107.70 no
C39 C38 C37 . . . 179.0(3) no
C39 C38 K2 . . . 85.87(17) no
C37 C38 K2 . . . 93.69(16) no
C38 C39 C40 . . . 176.7(3) no
C38 C39 K2 . . . 73.61(16) no
C40 C39 K2 . . . 108.53(18) no
C39 C40 H40A . . . 109.50 no
C39 C40 H40B . . . 109.50 no
H40A C40 H40B . . . 109.50 no
C39 C40 H40C . . . 109.50 no
H40A C40 H40C . . . 109.50 no
H40B C40 H40C . . . 109.50 no
O1 K3 O41 . . . 86.82(4) no
O1 K3 F24 . . . 148.20(4) no
O41 K3 F24 . . . 88.56(5) no
O1 K3 O21 . . . 90.05(4) no
O41 K3 O21 . . . 91.68(4) no
F24 K3 O21 . . . 58.64(4) no
O1 K3 F28 . . . 116.57(5) no
O41 K3 F28 . . . 142.50(5) no
F24 K3 F28 . . . 55.79(5) no
O21 K3 F28 . . . 61.42(4) no
O1 K3 F10 . . . 57.61(4) no
O41 K3 F10 . . . 143.07(4) no
F24 K3 F10 . . . 126.56(5) no
O21 K3 F10 . . . 97.48(4) no
F28 K3 F10 . . . 70.78(5) no
O1 K3 C58 . . . 107.74(6) no
O41 K3 C58 . . . 103.52(5) no
F24 K3 C58 . . . 103.94(6) no
O21 K3 C58 . . . 156.98(5) no
F28 K3 C58 . . . 96.84(5) no
F10 K3 C58 . . . 80.78(5) no
O1 K3 F49 . . . 137.94(4) no
O41 K3 F49 . . . 52.28(4) no
F24 K3 F49 . . . 52.97(4) no
O21 K3 F49 . . . 99.44(4) no
F28 K3 F49 . . . 103.74(5) no
F10 K3 F49 . . . 156.65(4) no
C58 K3 F49 . . . 77.34(5) no
O1 K3 C59 . . . 99.85(7) no
O41 K3 C59 . . . 121.78(6) no
F24 K3 C59 . . . 109.24(7) no
O21 K3 C59 . . . 145.32(6) no
F28 K3 C59 . . . 84.64(7) no
F10 K3 C59 . . . 62.12(6) no
C58 K3 C59 . . . 19.63(6) no
F49 K3 C59 . . . 95.14(6) no
O1 K3 C22 . . . 107.84(5) no
O41 K3 C22 . . . 104.04(5) no
F24 K3 C22 . . . 43.39(4) no
O21 K3 C22 . . . 21.37(4) no
F28 K3 C22 . . . 42.93(5) no
F10 K3 C22 . . . 96.84(4) no
C58 K3 C22 . . . 135.66(6) no
F49 K3 C22 . . . 93.15(4) no
C59 K3 C22 . . . 127.27(7) no
O1 K3 K4 . . . 89.11(3) no
O41 K3 K4 . . . 47.24(3) no
F24 K3 K4 . . . 65.23(4) no
O21 K3 K4 . . . 44.47(3) no
F28 K3 K4 . . . 101.27(3) no
F10 K3 K4 . . . 131.97(3) no
C58 K3 K4 . . . 146.39(5) no
F49 K3 K4 . . . 70.99(3) no
C59 K3 K4 . . . 165.81(5) no
C22 K3 K4 . . . 58.64(4) no
O1 K3 K2 . . . 45.21(3) no
O41 K3 K2 . . . 89.63(3) no
F24 K3 K2 . . . 103.35(3) no
O21 K3 K2 . . . 44.84(3) no
F28 K3 K2 . . . 88.11(4) no
F10 K3 K2 . . . 72.84(3) no
C58 K3 K2 . . . 149.88(5) no
F49 K3 K2 . . . 130.36(3) no
C59 K3 K2 . . . 134.25(5) no
C22 K3 K2 . . . 63.44(4) no
K4 K3 K2 . . . 59.40(1) no
C42 O41 K1 . . . 125.69(11) no
C42 O41 K3 . . . 134.86(12) no
K1 O41 K3 . . . 93.33(4) no
C42 O41 K4 . . . 111.43(11) no
K1 O41 K4 . . . 88.90(4) no
K3 O41 K4 . . . 88.47(4) no
O41 C42 C47 . . . 109.10(16) no
O41 C42 C43 . . . 108.93(16) no
C47 C42 C43 . . . 107.92(16) no
O41 C42 C51 . . . 116.42(15) no
C47 C42 C51 . . . 109.89(16) no
C43 C42 C51 . . . 104.20(15) no
F46 C43 F45 . . . 106.40(16) no
F46 C43 F44 . . . 105.66(16) no
F45 C43 F44 . . . 105.52(16) no
F46 C43 C42 . . . 114.96(17) no
F45 C43 C42 . . . 109.97(16) no
F44 C43 C42 . . . 113.65(16) no
C43 F44 K4 . . . 121.93(11) no
C43 F45 K1 . . . 104.73(11) no
F49 C47 F48 . . . 107.12(17) no
F49 C47 F50 . . . 105.17(17) no
F48 C47 F50 . . . 105.89(16) no
F49 C47 C42 . . . 111.86(16) no
F48 C47 C42 . . . 115.13(17) no
F50 C47 C42 . . . 111.03(17) no
C47 F49 K3 . . . 111.05(11) no
C47 F50 K4 . . . 113.85(11) no
N52 C51 C42 . . . 115.14(16) no
N52 C51 H51A . . . 108.50 no
C42 C51 H51A . . . 108.50 no
N52 C51 H51B . . . 108.50 no
C42 C51 H51B . . . 108.50 no
H51A C51 H51B . . . 107.50 no
C51 N52 C56 . . . 112.85(16) no
C51 N52 C53 . . . 113.20(17) no
C56 N52 C53 . . . 112.62(17) no
N52 C53 C55 . . . 110.5(2) no
N52 C53 C54 . . . 114.3(2) no
C55 C53 C54 . . . 111.6(2) no
N52 C53 H53 . . . 106.60 no
C55 C53 H53 . . . 106.60 no
C54 C53 H53 . . . 106.60 no
C53 C54 H54A . . . 109.50 no
C53 C54 H54B . . . 109.50 no
H54A C54 H54B . . . 109.50 no
C53 C54 H54C . . . 109.50 no
H54A C54 H54C . . . 109.50 no
H54B C54 H54C . . . 109.50 no
C53 C55 H55A . . . 109.50 no
C53 C55 H55B . . . 109.50 no
H55A C55 H55B . . . 109.50 no
C53 C55 H55C . . . 109.50 no
H55A C55 H55C . . . 109.50 no
H55B C55 H55C . . . 109.50 no
N52 C56 C57 . . . 110.82(18) no
N52 C56 H56A . . . 109.50 no
C57 C56 H56A . . . 109.50 no
N52 C56 H56B . . . 109.50 no
C57 C56 H56B . . . 109.50 no
H56A C56 H56B . . . 108.10 no
C58 C57 C56 . . . 114.2(2) no
C58 C57 H57A . . . 108.70 no
C56 C57 H57A . . . 108.70 no
C58 C57 H57B . . . 108.70 no
C56 C57 H57B . . . 108.70 no
H57A C57 H57B . . . 107.60 no
C59 C58 C57 . . . 177.1(3) no
C59 C58 K3 . . . 90.7(2) no
C57 C58 K3 . . . 91.47(15) no
C58 C59 C60 . . . 175.1(3) no
C58 C59 K3 . . . 69.68(19) no
C60 C59 K3 . . . 115.13(19) no
C59 C60 H60A . . . 109.50 no
C59 C60 H60B . . . 109.50 no
H60A C60 H60B . . . 109.50 no
C59 C60 H60C . . . 109.50 no
H60A C60 H60C . . . 109.50 no
H60B C60 H60C . . . 109.50 no
O61 K4 F44 . . . 96.98(4) no
O61 K4 O21 . . . 89.07(4) no
F44 K4 O21 . . . 150.07(4) no
O61 K4 O41 . . . 89.07(4) no
F44 K4 O41 . . . 59.88(4) no
O21 K4 O41 . . . 91.10(4) no
O61 K4 F50 . . . 143.88(4) no
F44 K4 F50 . . . 54.63(4) no
O21 K4 F50 . . . 105.66(4) no
O41 K4 F50 . . . 58.51(4) no
O61 K4 F25 . . . 145.56(4) no
F44 K4 F25 . . . 117.09(4) no
O21 K4 F25 . . . 59.08(4) no
O41 K4 F25 . . . 103.18(4) no
F50 K4 F25 . . . 65.03(4) no
O61 K4 C78 . . . 99.38(6) no
F44 K4 C78 . . . 99.01(8) no
O21 K4 C78 . . . 108.91(8) no
O41 K4 C78 . . . 158.26(8) no
F50 K4 C78 . . . 106.30(7) no
F25 K4 C78 . . . 81.05(6) no
O61 K4 C79 . . . 109.62(8) no
F44 K4 C79 . . . 79.75(10) no
O21 K4 C79 . . . 125.67(11) no
O41 K4 C79 . . . 137.56(9) no
F50 K4 C79 . . . 88.57(8) no
F25 K4 C79 . . . 82.86(10) no
C78 K4 C79 . . . 20.86(10) no
O61 K4 F70 . . . 53.99(4) no
F44 K4 F70 . . . 56.23(4) no
O21 K4 F70 . . . 142.08(4) no
O41 K4 F70 . . . 96.02(4) no
F50 K4 F70 . . . 109.79(4) no
F25 K4 F70 . . . 151.56(4) no
C78 K4 F70 . . . 73.62(6) no
C79 K4 F70 . . . 68.87(10) no
O61 K4 C76 . . . 61.04(5) no
F44 K4 C76 . . . 122.39(5) no
O21 K4 C76 . . . 86.13(5) no
O41 K4 C76 . . . 149.99(5) no
F50 K4 C76 . . . 150.41(5) no
F25 K4 C76 . . . 100.92(5) no
C78 K4 C76 . . . 44.27(8) no
C79 K4 C76 . . . 63.10(8) no
F70 K4 C76 . . . 69.49(4) no
O61 K4 K2 . . . 43.68(3) no
F44 K4 K2 . . . 132.09(3) no
O21 K4 K2 . . . 45.44(3) no
O41 K4 K2 . . . 88.41(3) no
F50 K4 K2 . . . 138.23(3) no
F25 K4 K2 . . . 103.80(3) no
C78 K4 K2 . . . 111.54(8) no
C79 K4 K2 . . . 131.55(8) no
F70 K4 K2 . . . 97.45(2) no
C76 K4 K2 . . . 68.55(4) no
O61 K4 K1 . . . 45.58(3) no
F44 K4 K1 . . . 72.55(3) no
O21 K4 K1 . . . 91.84(3) no
O41 K4 K1 . . . 43.54(3) no
F50 K4 K1 . . . 100.13(3) no
F25 K4 K1 . . . 138.23(4) no
C78 K4 K1 . . . 139.92(5) no
C79 K4 K1 . . . 137.76(10) no
F70 K4 K1 . . . 69.30(2) no
C76 K4 K1 . . . 106.62(4) no
K2 K4 K1 . . . 60.19(1) no
C62 O61 K2 . . . 128.68(11) no
C62 O61 K4 . . . 130.88(11) no
K2 O61 K4 . . . 92.42(4) no
C62 O61 K1 . . . 111.19(11) no
K2 O61 K1 . . . 91.01(4) no
K4 O61 K1 . . . 90.66(4) no
O61 C62 C67 . . . 109.05(16) no
O61 C62 C63 . . . 108.59(16) no
C67 C62 C63 . . . 108.31(17) no
O61 C62 C71 . . . 116.38(17) no
C67 C62 C71 . . . 109.50(16) no
C63 C62 C71 . . . 104.68(16) no
O61 C62 K1 . . . 47.37(9) no
C67 C62 K1 . . . 81.44(11) no
C63 C62 K1 . . . 82.34(11) no
C71 C62 K1 . . . 163.65(14) no
F66 C63 F64 . . . 106.38(17) no
F66 C63 F65 . . . 105.53(17) no
F64 C63 F65 . . . 105.86(17) no
F66 C63 C62 . . . 109.71(17) no
F64 C63 C62 . . . 115.15(18) no
F65 C63 C62 . . . 113.53(17) no
C63 F65 K1 . . . 115.43(11) no
C63 F66 K2 . . . 109.44(12) no
F70 C67 F69 . . . 106.92(17) no
F70 C67 F68 . . . 105.37(16) no
F69 C67 F68 . . . 105.38(17) no
F70 C67 C62 . . . 111.66(17) no
F69 C67 C62 . . . 114.69(17) no
F68 C67 C62 . . . 112.16(17) no
C67 F68 K1 . . . 116.10(12) no
C67 F70 K4 . . . 108.03(12) no
N72 C71 C62 . . . 113.99(16) no
N72 C71 H71A . . . 108.80 no
C62 C71 H71A . . . 108.80 no
N72 C71 H71B . . . 108.80 no
C62 C71 H71B . . . 108.80 no
H71A C71 H71B . . . 107.60 no
C76 N72 C71 . . . 110.97(17) no
C76 N72 C73 . . . 112.80(17) no
C71 N72 C73 . . . 113.99(17) no
N72 C73 C75 . . . 111.27(19) no
N72 C73 C74 . . . 114.71(19) no
C75 C73 C74 . . . 111.0(2) no
N72 C73 H73 . . . 106.40 no
C75 C73 H73 . . . 106.40 no
C74 C73 H73 . . . 106.40 no
C73 C74 H74A . . . 109.50 no
C73 C74 H74B . . . 109.50 no
H74A C74 H74B . . . 109.50 no
C73 C74 H74C . . . 109.50 no
H74A C74 H74C . . . 109.50 no
H74B C74 H74C . . . 109.50 no
C73 C75 H75A . . . 109.50 no
C73 C75 H75B . . . 109.50 no
H75A C75 H75B . . . 109.50 no
C73 C75 H75C . . . 109.50 no
H75A C75 H75C . . . 109.50 no
H75B C75 H75C . . . 109.50 no
N72 C76 C77 . . . 113.60(19) no
N72 C76 K4 . . . 90.88(12) no
C77 C76 K4 . . . 82.17(15) no
N72 C76 H76A . . . 108.80 no
C77 C76 H76A . . . 108.80 no
K4 C76 H76A . . . 149.80 no
N72 C76 H76B . . . 108.80 no
C77 C76 H76B . . . 108.80 no
H76A C76 H76B . . . 107.70 no
C78 C77 C76 . . . 113.6(2) no
C78 C77 H77A . . . 108.80 no
C76 C77 H77A . . . 108.80 no
C78 C77 H77B . . . 108.80 no
C76 C77 H77B . . . 108.80 no
H77A C77 H77B . . . 107.70 no
C79 C78 C77 . . . 176.5(4) no
C79 C78 K4 . . . 83.7(2) no
C77 C78 K4 . . . 97.55(16) no
C78 C79 C80 . . . 176.7(5) no
C78 C79 K4 . . . 75.4(2) no
C80 C79 K4 . . . 106.0(3) no
C79 C80 H80A . . . 109.50 no
C79 C80 H80B . . . 109.50 no
H80A C80 H80B . . . 109.50 no
C79 C80 H80C . . . 109.50 no
H80A C80 H80C . . . 109.50 no
H80B C80 H80C . . . 109.50 no

loop_
_geom_torsion_atom_site_label_1
_geom_torsion_atom_site_label_2
_geom_torsion_atom_site_label_3
_geom_torsion_atom_site_label_4
_geom_torsion_site_symmetry_1
_geom_torsion_site_symmetry_2
_geom_torsion_site_symmetry_3
_geom_torsion_site_symmetry_4
_geom_torsion
_geom_torsion_publ_flag
K3 O1 C2 C3 . . . . -168.63(11) no
K1 O1 C2 C3 . . . . 52.8(2) no
K2 O1 C2 C3 . . . . -61.75(17) no
K3 O1 C2 C7 . . . . -51.15(19) no
K1 O1 C2 C7 . . . . 170.31(12) no
K2 O1 C2 C7 . . . . 55.73(18) no
K3 O1 C2 C11 . . . . 66.3(2) no
K1 O1 C2 C11 . . . . -72.2(2) no
K2 O1 C2 C11 . . . . 173.22(13) no
K3 O1 C2 K2 . . . . -106.88(12) no
K1 O1 C2 K2 . . . . 114.58(17) no
O1 C2 C3 F6 . . . . -49.8(2) no
C7 C2 C3 F6 . . . . -167.61(17) no
C11 C2 C3 F6 . . . . 78.4(2) no
K2 C2 C3 F6 . . . . -89.72(15) no
O1 C2 C3 F4 . . . . -171.92(17) no
C7 C2 C3 F4 . . . . 70.2(2) no
C11 C2 C3 F4 . . . . -43.7(2) no
K2 C2 C3 F4 . . . . 148.12(17) no
O1 C2 C3 F5 . . . . 67.6(2) no
C7 C2 C3 F5 . . . . -50.2(2) no
C11 C2 C3 F5 . . . . -164.17(17) no
K2 C2 C3 F5 . . . . 27.67(16) no
F6 C3 F5 K2 . . . . 85.67(15) no
F4 C3 F5 K2 . . . . -160.99(13) no
C2 C3 F5 K2 . . . . -35.6(2) no
O1 C2 C7 F10 . . . . 65.8(2) no
C3 C2 C7 F10 . . . . -176.09(17) no
C11 C2 C7 F10 . . . . -58.5(2) no
K2 C2 C7 F10 . . . . 103.21(15) no
O1 C2 C7 F8 . . . . -173.85(17) no
C3 C2 C7 F8 . . . . -55.7(2) no
C11 C2 C7 F8 . . . . 61.8(2) no
K2 C2 C7 F8 . . . . -136.40(18) no
O1 C2 C7 F9 . . . . -51.8(2) no
C3 C2 C7 F9 . . . . 66.4(2) no
C11 C2 C7 F9 . . . . -176.10(17) no
K2 C2 C7 F9 . . . . -14.35(16) no
F10 C7 F9 K2 . . . . -99.31(16) no
F8 C7 F9 K2 . . . . 147.68(13) no
C2 C7 F9 K2 . . . . 20.9(2) no
F8 C7 F10 K3 . . . . -171.35(12) no
F9 C7 F10 K3 . . . . 76.39(15) no
C2 C7 F10 K3 . . . . -46.41(18) no
O1 C2 C11 N12 . . . . 78.1(2) no
C3 C2 C11 N12 . . . . -46.3(2) no
C7 C2 C11 N12 . . . . -162.33(17) no
K2 C2 C11 N12 . . . . 93.7(4) no
C2 C11 N12 C16 . . . . -74.9(2) no
C2 C11 N12 C13 . . . . 155.71(17) no
C11 N12 C13 C15 . . . . -75.2(3) no
C16 N12 C13 C15 . . . . 154.8(2) no
C11 N12 C13 C14 . . . . 51.6(2) no
C16 N12 C13 C14 . . . . -78.4(2) no
C11 N12 C16 C17 . . . . 144.14(18) no
C13 N12 C16 C17 . . . . -85.2(2) no
C11 N12 C16 K1 . . . . 55.2(2) no
C13 N12 C16 K1 . . . . -174.13(14) no
N12 C16 C17 C18 . . . . -172.30(18) no
K1 C16 C17 C18 . . . . -54.97(17) no
N12 C16 C17 K1 . . . . -117.34(14) no
C16 C17 C18 K1 . . . . 59.59(17) no
K4 O21 C22 C27 . . . . 158.47(14) no
K2 O21 C22 C27 . . . . -58.1(3) no
K3 O21 C22 C27 . . . . 56.73(18) no
K4 O21 C22 C23 . . . . 40.4(2) no
K2 O21 C22 C23 . . . . -176.15(15) no
K3 O21 C22 C23 . . . . -61.37(19) no
K4 O21 C22 C31 . . . . -76.58(19) no
K2 O21 C22 C31 . . . . 66.9(3) no
K3 O21 C22 C31 . . . . -178.32(13) no
K4 O21 C22 K3 . . . . 101.75(12) no
K2 O21 C22 K3 . . . . -114.8(2) no
O21 C22 C23 F26 . . . . 173.0(2) no
C27 C22 C23 F26 . . . . 54.3(3) no
C31 C22 C23 F26 . . . . -62.2(3) no
K3 C22 C23 F26 . . . . 131.4(2) no
O21 C22 C23 F24 . . . . 50.7(3) no
C27 C22 C23 F24 . . . . -68.0(2) no
C31 C22 C23 F24 . . . . 175.5(2) no
K3 C22 C23 F24 . . . .  9.08(19) no
O21 C22 C23 F25 . . . . -66.7(2) no
C27 C22 C23 F25 . . . . 174.57(17) no
C31 C22 C23 F25 . . . . 58.1(2) no
K3 C22 C23 F25 . . . . -108.33(15) no
F26 C23 F24 K3 . . . . -140.44(16) no
F25 C23 F24 K3 . . . . 106.84(17) no
C22 C23 F24 K3 . . . . -13.1(3) no
F26 C23 F25 K4 . . . . -179.24(13) no
F24 C23 F25 K4 . . . . -66.88(16) no
C22 C23 F25 K4 . . . . 55.31(17) no
O21 C22 C27 F29 . . . . 49.6(2) no
C23 C22 C27 F29 . . . . 167.67(17) no
C31 C22 C27 F29 . . . . -79.4(2) no
K3 C22 C27 F29 . . . . 89.17(16) no
O21 C22 C27 F30 . . . . 171.9(2) no
C23 C22 C27 F30 . . . . -70.1(3) no
C31 C22 C27 F30 . . . . 42.9(3) no
K3 C22 C27 F30 . . . . -148.6(2) no
O21 C22 C27 F28 . . . . -67.8(3) no
C23 C22 C27 F28 . . . . 50.2(2) no
C31 C22 C27 F28 . . . . 163.19(19) no
K3 C22 C27 F28 . . . . -28.26(18) no
F29 C27 F28 K3 . . . . -82.06(19) no
F30 C27 F28 K3 . . . . 164.40(15) no
C22 C27 F28 K3 . . . . 39.2(2) no
O21 C22 C31 N32 . . . . -76.6(2) no
C27 C22 C31 N32 . . . . 48.4(2) no
C23 C22 C31 N32 . . . . 164.17(19) no
K3 C22 C31 N32 . . . . -81.5(6) no
C22 C31 N32 C36 . . . . 75.6(2) no
C22 C31 N32 C33A . . . . -155.9(2) no
C22 C31 N32 C33B . . . . -155.9(2) no
C36 N32 C33A C35A . . . . -154.7(3) no
C31 N32 C33A C35A . . . . 76.8(3) no
C36 N32 C33A C34A . . . . 73.0(3) no
C31 N32 C33A C34A . . . . -55.4(3) no
C36 N32 C33B C35B . . . . -75.2(6) no
C31 N32 C33B C35B . . . . 156.4(6) no
C36 N32 C33B C34B . . . . 73.0(3) no
C31 N32 C33B C34B . . . . -55.4(3) no
C31 N32 C36 C37 . . . . -144.9(2) no
C33A N32 C36 C37 . . . . 86.4(3) no
C33B N32 C36 C37 . . . . 86.4(3) no
C31 N32 C36 K2 . . . . -52.8(2) no
C33A N32 C36 K2 . . . . 178.50(14) no
C33B N32 C36 K2 . . . . 178.50(14) no
N32 C36 C37 C38 . . . . 169.0(2) no
K2 C36 C37 C38 . . . . 50.3(2) no
C36 C37 C38 K2 . . . . -56.8(2) no
K1 O41 C42 C47 . . . . -168.87(11) no
K3 O41 C42 C47 . . . . 46.5(2) no
K4 O41 C42 C47 . . . . -64.00(16) no
K1 O41 C42 C43 . . . . -51.29(19) no
K3 O41 C42 C43 . . . . 164.06(11) no
K4 O41 C42 C43 . . . . 53.58(16) no
K1 O41 C42 C51 . . . . 66.1(2) no
K3 O41 C42 C51 . . . . -78.6(2) no
K4 O41 C42 C51 . . . . 170.96(12) no
O41 C42 C43 F46 . . . . -172.19(16) no
C47 C42 C43 F46 . . . . -53.9(2) no
C51 C42 C43 F46 . . . . 62.9(2) no
O41 C42 C43 F45 . . . . 67.8(2) no
C47 C42 C43 F45 . . . . -173.90(15) no
C51 C42 C43 F45 . . . . -57.11(19) no
O41 C42 C43 F44 . . . . -50.3(2) no
C47 C42 C43 F44 . . . . 68.1(2) no
C51 C42 C43 F44 . . . . -175.15(16) no
F46 C43 F44 K4 . . . . 146.90(12) no
F45 C43 F44 K4 . . . . -100.63(15) no
C42 C43 F44 K4 . . . . 19.9(2) no
F46 C43 F45 K1 . . . . -172.93(11) no
F44 C43 F45 K1 . . . . 75.11(14) no
C42 C43 F45 K1 . . . . -47.84(16) no
O41 C42 C47 F49 . . . . -51.1(2) no
C43 C42 C47 F49 . . . . -169.30(16) no
C51 C42 C47 F49 . . . . 77.7(2) no
O41 C42 C47 F48 . . . . -173.66(17) no
C43 C42 C47 F48 . . . . 68.1(2) no
C51 C42 C47 F48 . . . . -44.9(2) no
O41 C42 C47 F50 . . . . 66.1(2) no
C43 C42 C47 F50 . . . . -52.1(2) no
C51 C42 C47 F50 . . . . -165.18(16) no
F48 C47 F49 K3 . . . . 163.80(11) no
F50 C47 F49 K3 . . . . -83.85(14) no
C42 C47 F49 K3 . . . . 36.77(18) no
F49 C47 F50 K4 . . . . 89.02(15) no
F48 C47 F50 K4 . . . . -157.76(11) no
C42 C47 F50 K4 . . . . -32.15(19) no
O41 C42 C51 N52 . . . . 78.9(2) no
C47 C42 C51 N52 . . . . -45.7(2) no
C43 C42 C51 N52 . . . . -161.10(16) no
C42 C51 N52 C56 . . . . -77.0(2) no
C42 C51 N52 C53 . . . . 153.59(18) no
C51 N52 C53 C55 . . . . -78.3(3) no
C56 N52 C53 C55 . . . . 152.2(2) no
C51 N52 C53 C54 . . . . 48.6(3) no
C56 N52 C53 C54 . . . . -80.9(2) no
C51 N52 C56 C57 . . . . 147.22(19) no
C53 N52 C56 C57 . . . . -83.1(2) no
N52 C56 C57 C58 . . . . -165.8(2) no
C56 C57 C58 K3 . . . . 58.6(2) no
K2 O61 C62 C67 . . . . 167.42(11) no
K4 O61 C62 C67 . . . . -52.7(2) no
K1 O61 C62 C67 . . . . 57.87(16) no
K2 O61 C62 C63 . . . . 49.6(2) no
K4 O61 C62 C63 . . . . -170.56(12) no
K1 O61 C62 C63 . . . . -59.96(17) no
K2 O61 C62 C71 . . . . -68.1(2) no
K4 O61 C62 C71 . . . . 71.7(2) no
K1 O61 C62 C71 . . . . -177.69(12) no
K2 O61 C62 K1 . . . . 109.55(14) no
K4 O61 C62 K1 . . . . -110.60(15) no
O61 C62 C63 F66 . . . . -59.8(2) no
C67 C62 C63 F66 . . . . -178.13(17) no
C71 C62 C63 F66 . . . . 65.1(2) no
K1 C62 C63 F66 . . . . -99.83(15) no
O61 C62 C63 F64 . . . . -179.78(17) no
C67 C62 C63 F64 . . . . 61.9(2) no
C71 C62 C63 F64 . . . . -54.8(2) no
K1 C62 C63 F64 . . . . 140.23(18) no
O61 C62 C63 F65 . . . . 58.0(2) no
C67 C62 C63 F65 . . . . -60.3(2) no
C71 C62 C63 F65 . . . . -177.10(18) no
K1 C62 C63 F65 . . . . 17.97(16) no
F66 C63 F65 K1 . . . . 95.55(15) no
F64 C63 F65 K1 . . . . -151.92(12) no
C62 C63 F65 K1 . . . . -24.6(2) no
F64 C63 F66 K2 . . . . 168.19(11) no
F65 C63 F66 K2 . . . . -79.65(15) no
C62 C63 F66 K2 . . . . 43.03(18) no
O61 C62 C67 F70 . . . . 58.1(2) no
C63 C62 C67 F70 . . . . 176.14(16) no
C71 C62 C67 F70 . . . . -70.3(2) no
K1 C62 C67 F70 . . . . 97.20(15) no
O61 C62 C67 F69 . . . . 179.95(16) no
C63 C62 C67 F69 . . . . -62.0(2) no
C71 C62 C67 F69 . . . . 51.6(2) no
K1 C62 C67 F69 . . . . -140.99(17) no
O61 C62 C67 F68 . . . . -59.9(2) no
C63 C62 C67 F68 . . . . 58.1(2) no
C71 C62 C67 F68 . . . . 171.73(16) no
K1 C62 C67 F68 . . . . -20.82(14) no
F70 C67 F68 K1 . . . . -92.33(16) no
F69 C67 F68 K1 . . . . 154.79(12) no
C62 C67 F68 K1 . . . . 29.4(2) no
F69 C67 F70 K4 . . . . -164.99(12) no
F68 C67 F70 K4 . . . . 83.22(15) no
C62 C67 F70 K4 . . . . -38.79(17) no
O61 C62 C71 N72 . . . . -56.4(2) no
C67 C62 C71 N72 . . . . 67.8(2) no
C63 C62 C71 N72 . . . . -176.25(17) no
K1 C62 C71 N72 . . . . -62.4(5) no
C62 C71 N72 C76 . . . . 91.2(2) no
C62 C71 N72 C73 . . . . -140.08(18) no
C76 N72 C73 C75 . . . . -162.9(2) no
C71 N72 C73 C75 . . . . 69.3(2) no
C76 N72 C73 C74 . . . . 70.1(3) no
C71 N72 C73 C74 . . . . -57.7(3) no
C71 N72 C76 C77 . . . . -172.08(19) no
C73 N72 C76 C77 . . . . 58.6(3) no
C71 N72 C76 K4 . . . . -90.24(14) no
C73 N72 C76 K4 . . . . 140.45(14) no
N72 C76 C77 C78 . . . . 44.3(3) no
K4 C76 C77 C78 . . . . -43.2(2) no
C76 C77 C78 K4 . . . . 50.3(2) no
