# Supplementary material
Source: MDPI journal article supplement (https://www.mdpi.com/2304-6740/5/1/13)
Supplement: s1 [file s1 › inorganics-05-00013-supplementary/Complex_3_SR437_CIFfile.cif]

#\#CIF_1.1

#  CIF produced by WinGX routine CIF_UPDATE
#  Created on 2014-03-28 at 17:10:14
#  Using CIFtbx version 2.6.2 16 Jun 1998

#  Dictionary name : cif_core.dic
#  Dictionary vers : 2.3
#  Request file    : c:\progs\wingx\files\archive.dat
#  CIF files read  : SR437 struct


#----------------------------------------------------------------------------#
#  CIF file completed and formatted by CRYSCAL (Jan. 2014)                   #
#  Date of diffraction experiment : 28mar14                                  #
#----------------------------------------------------------------------------#

#----------------------------------------------------------------------------#
#----------------------------------------------------------------------------#

data_SR437

_audit_creation_date                    2014-03-28T17:10:14-00:00
_audit_creation_method                  'WinGX routine CIF_UPDATE'
_audit_conform_dict_name                cif_core.dic
_audit_conform_dict_version             2.3
_audit_conform_dict_location            ftp://ftp.iucr.org/pub/cif_core.dic
_publ_requested_category                FM

#----------------------------------------------------------------------------#
#                   CHEMICAL INFORMATION                                     #
#----------------------------------------------------------------------------#

_chemical_name_systematic
;
 ?
;
_chemical_formula_moiety                'C12 H16 F6 K1 N1 O1'
_chemical_formula_sum                   'C12 H16 F6 K N O'
_chemical_formula_weight                343.36
_chemical_compound_source               'synthesis as described'
_chemical_absolute_configuration        ad

#----------------------------------------------------------------------------#
#                   UNIT CELL INFORMATION                                    #
#----------------------------------------------------------------------------#

_symmetry_cell_setting                  tetragonal
_symmetry_space_group_name_H-M          'P -4 21 c'
_symmetry_space_group_name_Hall         'P -4 2n'
_symmetry_Int_Tables_number             114
loop_
    _symmetry_equiv_pos_as_xyz
'x, y, z'
'-x, -y, z'
'x+1/2, -y+1/2, -z+1/2'
'-x+1/2, y+1/2, -z+1/2'
'y+1/2, x+1/2, z+1/2'
'-y+1/2, -x+1/2, z+1/2'
'-y, x, -z'
'y, -x, -z'

_cell_length_a                          13.5114(14)
_cell_length_b                          13.5114
_cell_length_c                          17.556(3)
_cell_angle_alpha                       90
_cell_angle_beta                        90
_cell_angle_gamma                       90
_cell_volume                            3205.0(6)
_cell_formula_units_Z                   8
_cell_measurement_temperature           150(2)
_cell_measurement_reflns_used           445
_cell_measurement_theta_min             2.77
_cell_measurement_theta_max             18.79
_cell_measurement_wavelength            0.71073

#----------------------------------------------------------------------------#
#                   CRYSTAL INFORMATION                                      #
#----------------------------------------------------------------------------#

_exptl_crystal_description              prism
_exptl_crystal_colour                   colourless
_exptl_crystal_size_max                 0.39
_exptl_crystal_size_mid                 0.27
_exptl_crystal_size_min                 0.1
_exptl_crystal_density_diffrn           1.423
_exptl_crystal_density_method           'not measured'
_exptl_crystal_F_000                    1408
_exptl_special_details
;
 ?
;

#----------------------------------------------------------------------------#
#                   ABSORPTION CORRECTION                                    #
#----------------------------------------------------------------------------#

_exptl_absorpt_coefficient_mu    0.389
_exptl_absorpt_correction_type                              multi-scan
_exptl_absorpt_process_details
;
  [Sheldrick, G.M. (2002). SADABS Bruker AXS Inc., Madison, Wisconsin, USA]
;
_exptl_absorpt_correction_T_min  0.794
_exptl_absorpt_correction_T_max  0.962


#----------------------------------------------------------------------------#
#                   DATA COLLECTION                                          #
#----------------------------------------------------------------------------#

_diffrn_measurement_device_type         'APEXII, Bruker-AXS'
_diffrn_measurement_method              'CCD rotation images, thin slices'
_diffrn_detector                        'CCD plate'
_diffrn_ambient_temperature             150(2)
_diffrn_radiation_wavelength            0.71073
_diffrn_radiation_type                  MoK\a
_diffrn_radiation_monochromator         graphite
_diffrn_radiation_probe                 x-ray
_diffrn_reflns_av_R_equivalents         0.0886
_diffrn_reflns_av_unetI/netI            0.0888
_diffrn_reflns_number                   17470
_diffrn_reflns_limit_h_min              -17
_diffrn_reflns_limit_h_max              13
_diffrn_reflns_limit_k_min              -17
_diffrn_reflns_limit_k_max              17
_diffrn_reflns_limit_l_min              -22
_diffrn_reflns_limit_l_max              18
_diffrn_reflns_theta_min                3.02
_diffrn_reflns_theta_max                27.5
_diffrn_reflns_theta_full               27.5
_diffrn_measured_fraction_theta_full
                                        0.996
_diffrn_measured_fraction_theta_max
                                        0.996
_reflns_number_total                    3501
_reflns_number_gt                       2146
_reflns_threshold_expression            >2sigma(I)

#----------------------------------------------------------------------------#
#                   COMPUTER PROGRAMS USED                                   #
#----------------------------------------------------------------------------#

_computing_data_collection              'Bruker APEX2 (Bruker, 2006)'
_computing_cell_refinement              'Bruker APEX2 (Bruker, 2006)'
_computing_data_reduction               'Bruker APEX2 (Bruker, 2006)'
_computing_structure_solution           'SIR97 (Altomare et al., 1999)'
_computing_structure_refinement         'SHELXL-97 (Sheldrick, 1997)'
_computing_molecular_graphics           'Ortep-3 for Windows (Farrugia, 1997)'
_computing_publication_material          
;
           WinGX publication routines (Farrugia, 2012),
           CRYSCAL (T. Roisnel, local program)
;

#----------------------------------------------------------------------------#
#                   REFINEMENT INFORMATION                                   #
#----------------------------------------------------------------------------#

_refine_special_details
;
 Refinement of F^2^ against ALL reflections.  The weighted R-factor wR and
 goodness of fit S are based on F^2^, conventional R-factors R are based
 on F, with F set to zero for negative F^2^. The threshold expression of
 F^2^ > 2sigma(F^2^) is used only for calculating R-factors(gt) etc. and is
 not relevant to the choice of reflections for refinement.  R-factors based
 on F^2^ are statistically about twice as large as those based on F, and R-
 factors based on ALL data will be even larger.
;
_refine_ls_structure_factor_coef        Fsqd
_refine_ls_matrix_type                  full
_refine_ls_weighting_scheme             calc
_refine_ls_weighting_details
         'calc w=1/[\s^2^(Fo^2^)+(0.0357P)^2^+0.0000P] where P=(Fo^2^+2Fc^2^)/3'
_atom_sites_solution_primary            direct
_atom_sites_solution_secondary          difmap
_atom_sites_solution_hydrogens          geom
_refine_ls_hydrogen_treatment           constr
_refine_ls_extinction_method            SHELXL
_refine_ls_extinction_expression
                                    Fc^*^=kFc[1+0.001xFc^2^\l^3^/sin(2\q)]^-1/4^
_refine_ls_extinction_coef              0.0034(5)
_refine_ls_number_reflns                3501
_refine_ls_number_parameters            191
_refine_ls_number_restraints            0
_refine_ls_R_factor_all                 0.1014
_refine_ls_R_factor_gt                  0.0466
_refine_ls_wR_factor_ref                0.0942
_refine_ls_wR_factor_gt                 0.0794
_refine_ls_goodness_of_fit_ref          0.963
_refine_ls_restrained_S_all             0.963
_refine_ls_shift/su_max                 0.002
_refine_ls_shift/su_mean                0
_refine_ls_abs_structure_details
                                    'Flack H D (1983), Acta Cryst. A39, 876-881'
_refine_ls_abs_structure_Flack          -0.03(5)
_refine_diff_density_max                0.234
_refine_diff_density_min                -0.222
_refine_diff_density_rms                0.052

_iucr_refine_instructions_details
;
 .res file for SHELXL : SR437.res
.................................................................
TITL import in P -4 21 c
CELL  0.71073  13.5114  13.5114  17.5560   90.000   90.000   90.000
ZERR     8.00   0.0014   0.0000   0.0030    0.000    0.000    0.000
LATT  -1
SYMM  - X, - Y,   Z
SYMM  1/2 + X, 1/2 - Y, 1/2 - Z
SYMM  1/2 - X, 1/2 + Y, 1/2 - Z
SYMM  1/2 + Y, 1/2 + X, 1/2 + Z
SYMM  1/2 - Y, 1/2 - X, 1/2 + Z
SYMM  - Y,   X, - Z
SYMM    Y, - X, - Z
SFAC  C    H    N    O    F    K
UNIT  96   128  8    8    48   8
MERG   2
FMAP   2
PLAN   20
ACTA
BOND   $H
CONF
LIST   4
WPDB  -2
L.S.   4
TEMP  -123.00
WGHT    0.035700
EXTI    0.003445
FVAR       0.47823
K1    6    1.035444    0.135979    0.925167    11.00000    0.03384    0.02792 =
         0.03137    0.00220   -0.00059   -0.00139
O1    4    0.864314    0.042442    0.925415    11.00000    0.03384    0.02856 =
         0.03061    0.00110   -0.00907   -0.00043
C1    1    0.841688    0.033943    0.792253    11.00000    0.05237    0.03380 =
         0.03962    0.00167   -0.01540    0.00688
F1    5    0.928359    0.078298    0.778032    11.00000    0.05138    0.04496 =
         0.04637    0.00389    0.00998   -0.00281
F2    5    0.860703   -0.064770    0.789458    11.00000    0.05536    0.03700 =
         0.04587   -0.00672   -0.00859    0.00566
F3    5    0.783281    0.052074    0.732228    11.00000    0.06980    0.07481 =
         0.03428   -0.00554   -0.01862    0.02203
C2    1    0.799707    0.066457    0.869976    11.00000    0.03782    0.02861 =
         0.03028    0.00023   -0.00989    0.00173
C3    1    0.700732    0.012043    0.883243    11.00000    0.04347    0.03329 =
         0.04435    0.00621   -0.01336   -0.00292
F4    5    0.710775   -0.087328    0.883407    11.00000    0.06466    0.03373 =
         0.05636    0.00536   -0.00769   -0.01454
F5    5    0.630152    0.032780    0.831964    11.00000    0.04656    0.06470 =
         0.07922    0.02399   -0.03089   -0.01986
F6    5    0.663391    0.036032    0.951640    11.00000    0.05063    0.04707 =
         0.05677    0.00510    0.01246   -0.00246
C4    1    0.770663    0.178564    0.865930    11.00000    0.03574    0.03031 =
         0.04225    0.00001   -0.00716    0.00134
AFIX  23
H4A   2    0.731806    0.189968    0.818934    11.00000   -1.20000
H4B   2    0.727506    0.194393    0.909843    11.00000   -1.20000
AFIX   0
N5    3    0.856028    0.246826    0.866354    11.00000    0.04183    0.02872 =
         0.03982    0.00444   -0.00544   -0.00547
C6    1    0.851967    0.312342    0.933038    11.00000    0.05212    0.03499 =
         0.04526   -0.00032   -0.01607   -0.00032
AFIX  23
H6A   2    0.916161    0.347299    0.936956    11.00000   -1.20000
H6B   2    0.845137    0.270550    0.979057    11.00000   -1.20000
AFIX   0
C7    1    0.768839    0.390530    0.934399    11.00000    0.07347    0.03510 =
         0.06095   -0.00913   -0.01764    0.01420
AFIX  23
H7A   2    0.776909    0.435875    0.890542    11.00000   -1.20000
H7B   2    0.703945    0.357162    0.929294    11.00000   -1.20000
AFIX   0
C8    1    0.770640    0.449344    1.007166    11.00000    0.11761    0.05269 =
         0.09134   -0.01932   -0.01674    0.03427
AFIX  43
H8    2    0.828956    0.486188    1.017644    11.00000   -1.20000
AFIX   0
C9    1    0.700004    0.454296    1.056749    11.00000    0.18159    0.11816 =
         0.09853   -0.03589   -0.01402    0.07315
AFIX  93
H9A   2    0.640293    0.418685    1.048676    11.00000   -1.20000
H9B   2    0.707836    0.493546    1.101240    11.00000   -1.20000
AFIX   0
C10   1    0.865406    0.299756    0.793106    11.00000    0.04966    0.03855 =
         0.04364    0.01545   -0.00662   -0.00295
AFIX  23
H10A  2    0.807085    0.343187    0.786173    11.00000   -1.20000
H10B  2    0.865568    0.250876    0.751098    11.00000   -1.20000
AFIX   0
C11   1    0.958710    0.361993    0.788235    11.00000    0.05678    0.04754 =
         0.07604    0.03436   -0.00160   -0.00495
AFIX  23
H11A  2    0.960704    0.394726    0.737807    11.00000   -1.20000
H11B  2    0.955384    0.414546    0.827446    11.00000   -1.20000
AFIX   0
C12   1    1.052026    0.305185    0.798956    11.00000    0.04994    0.05556 =
         0.07167    0.02744    0.00905   -0.00881
AFIX  43
H12   2    1.061183    0.248290    0.767953    11.00000   -1.20000
AFIX   0
C13   1    1.123607    0.326894    0.847956    11.00000    0.05761    0.06609 =
         0.09522    0.04087    0.00082   -0.01882
AFIX  93
H13A  2    1.117629    0.383123    0.880117    11.00000   -1.20000
H13B  2    1.180823    0.286204    0.850870    11.00000   -1.20000
HKLF    4

REM  import in P -4 21 c
REM R1 =  0.0466 for   2146 Fo > 4sig(Fo)  and  0.1014 for all   3501 data
REM    191 parameters refined using      0 restraints

END

WGHT      0.0348      0.0000
 REM Highest difference peak   0.23,  deepest hole  -0.22,  1-sigma level   0.05
Q1    1   0.9636  0.2315  0.9198  11.00000  0.05    0.23
Q2    1   0.7798 -0.0382  0.9312  11.00000  0.05    0.22
Q3    1   0.9082  0.1160  0.8658  11.00000  0.05    0.21
Q4    1   1.0522  0.1316  0.9495  11.00000  0.05    0.21
Q5    1   0.8313  0.4714  0.9996  11.00000  0.05    0.20
Q6    1   0.9421  0.4360  0.8165  11.00000  0.05    0.20
Q7    1   0.7783  0.5418  0.9862  11.00000  0.05    0.19
Q8    1   0.8997  0.5152  0.9823  11.00000  0.05    0.19
Q9    1   0.6321 -0.0786  0.9462  11.00000  0.05    0.18
Q10   1   0.9316  0.2292  0.9937  11.00000  0.05    0.18
Q11   1   0.7578  0.0929  0.9876  11.00000  0.05    0.18
Q12   1   0.6003  0.3216  0.9626  11.00000  0.05    0.18
Q13   1   1.1009  0.3745  0.9279  11.00000  0.05    0.18
Q14   1   0.6852  0.0475  0.9201  11.00000  0.05    0.18
Q15   1   0.6557  0.5206  1.1661  11.00000  0.05    0.17
Q16   1   0.6286  0.4322  0.8764  11.00000  0.05    0.17
Q17   1   1.0716  0.2072  0.8773  11.00000  0.05    0.17
Q18   1   0.7699  0.1011  0.8696  11.00000  0.05    0.17
Q19   1   0.6888  0.0409  0.6940  11.00000  0.05    0.17
Q20   1   0.7688  0.0601  0.9178  11.00000  0.05    0.17
;
# End of res file
#----------------------------------------------------------------------------#

#----------------------------------------------------------------------------#
#                   ATOMIC TYPES, COORDINATES AND THERMAL PARAMETERS         #
#----------------------------------------------------------------------------#

loop_
    _atom_type_symbol
    _atom_type_description
    _atom_type_scat_dispersion_real
    _atom_type_scat_dispersion_imag
    _atom_type_scat_source
C   C    0.0033  0.0016  'International Tables Vol C Tables 4.2.6.8 and 6.1.1.4'
H   H    0       0       'International Tables Vol C Tables 4.2.6.8 and 6.1.1.4'
N   N    0.0061  0.0033  'International Tables Vol C Tables 4.2.6.8 and 6.1.1.4'
O   O    0.0106  0.006   'International Tables Vol C Tables 4.2.6.8 and 6.1.1.4'
F   F    0.0171  0.0103  'International Tables Vol C Tables 4.2.6.8 and 6.1.1.4'
K   K    0.2009  0.2494  'International Tables Vol C Tables 4.2.6.8 and 6.1.1.4'


loop_
    _atom_site_label
    _atom_site_type_symbol
    _atom_site_fract_x
    _atom_site_fract_y
    _atom_site_fract_z
    _atom_site_U_iso_or_equiv
    _atom_site_adp_type
    _atom_site_occupancy
    _atom_site_symmetry_multiplicity
    _atom_site_calc_flag
    _atom_site_refinement_flags
    _atom_site_disorder_assembly
    _atom_site_disorder_group
K1   K   1.03544(5)   0.13598(5)   0.92517(4)   0.03104(19) Uani 1 1 d    .  . . 
O1   O   0.86431(14)  0.04244(14)  0.92541(11)  0.0310(5)   Uani 1 1 d    .  . . 
C1   C   0.8417(3)    0.0339(3)    0.7923(2)    0.0419(9)   Uani 1 1 d    .  . . 
F1   F   0.92836(15)  0.07830(14)  0.77803(12)  0.0476(5)   Uani 1 1 d    .  . . 
F2   F   0.86070(15) -0.06477(13)  0.78946(11)  0.0461(5)   Uani 1 1 d    .  . . 
F3   F   0.78328(16)  0.05207(17)  0.73223(11)  0.0596(6)   Uani 1 1 d    .  . . 
C2   C   0.7997(2)    0.0665(2)    0.86998(19)  0.0322(8)   Uani 1 1 d    .  . . 
C3   C   0.7007(3)    0.0120(3)    0.8832(2)    0.0404(9)   Uani 1 1 d    .  . . 
F4   F   0.71078(15) -0.08733(14)  0.88341(13)  0.0516(6)   Uani 1 1 d    .  . . 
F5   F   0.63015(16)  0.03278(16)  0.83196(13)  0.0635(6)   Uani 1 1 d    .  . . 
F6   F   0.66339(14)  0.03603(15)  0.95164(12)  0.0515(6)   Uani 1 1 d    .  . . 
C4   C   0.7707(2)    0.1786(2)    0.8659(2)    0.0361(9)   Uani 1 1 d    .  . . 
H4A  H   0.7318       0.19         0.8189       0.043       Uiso 1 1 calc R  . . 
H4B  H   0.7275       0.1944       0.9098       0.043       Uiso 1 1 calc R  . . 
N5   N   0.8560(2)    0.24683(19)  0.86635(16)  0.0368(7)   Uani 1 1 d    .  . . 
C6   C   0.8520(3)    0.3123(2)    0.9330(2)    0.0441(9)   Uani 1 1 d    .  . . 
H6A  H   0.9162       0.3473       0.937        0.053       Uiso 1 1 calc R  . . 
H6B  H   0.8451       0.2705       0.9791       0.053       Uiso 1 1 calc R  . . 
C7   C   0.7688(3)    0.3905(3)    0.9344(2)    0.0565(11)  Uani 1 1 d    .  . . 
H7A  H   0.7769       0.4359       0.8905       0.068       Uiso 1 1 calc R  . . 
H7B  H   0.7039       0.3572       0.9293       0.068       Uiso 1 1 calc R  . . 
C8   C   0.7706(4)    0.4493(3)    1.0072(3)    0.0872(17)  Uani 1 1 d    .  . . 
H8   H   0.829        0.4862       1.0176       0.105       Uiso 1 1 calc R  . . 
C9   C   0.7000(6)    0.4543(5)    1.0567(4)    0.133(3)    Uani 1 1 d    .  . . 
H9A  H   0.6403       0.4187       1.0487       0.159       Uiso 1 1 calc R  . . 
H9B  H   0.7078       0.4935       1.1012       0.159       Uiso 1 1 calc R  . . 
C10  C   0.8654(3)    0.2998(3)    0.7931(2)    0.0440(10)  Uani 1 1 d    .  . . 
H10A H   0.8071       0.3432       0.7862       0.053       Uiso 1 1 calc R  . . 
H10B H   0.8656       0.2509       0.7511       0.053       Uiso 1 1 calc R  . . 
C11  C   0.9587(3)    0.3620(3)    0.7882(3)    0.0601(11)  Uani 1 1 d    .  . . 
H11A H   0.9607       0.3947       0.7378       0.072       Uiso 1 1 calc R  . . 
H11B H   0.9554       0.4145       0.8274       0.072       Uiso 1 1 calc R  . . 
C12  C   1.0520(3)    0.3052(3)    0.7990(3)    0.0591(12)  Uani 1 1 d    .  . . 
H12  H   1.0612       0.2483       0.768        0.071       Uiso 1 1 calc R  . . 
C13  C   1.1236(3)    0.3269(3)    0.8480(3)    0.0730(15)  Uani 1 1 d    .  . . 
H13A H   1.1176       0.3831       0.8801       0.088       Uiso 1 1 calc R  . . 
H13B H   1.1808       0.2862       0.8509       0.088       Uiso 1 1 calc R  . . 


loop_
    _atom_site_aniso_label
    _atom_site_aniso_U_11
    _atom_site_aniso_U_22
    _atom_site_aniso_U_33
    _atom_site_aniso_U_23
    _atom_site_aniso_U_13
    _atom_site_aniso_U_12
K1   0.0338(4)    0.0279(4)    0.0314(4)    0.0022(4)   -0.0006(4)   -0.0014(3)   
O1   0.0338(11)   0.0286(10)   0.0306(11)   0.0011(12)  -0.0091(12)  -0.0004(11)  
C1   0.052(2)     0.0338(19)   0.040(2)     0.0017(19)  -0.015(2)     0.007(2)    
F1   0.0514(13)   0.0450(12)   0.0464(13)   0.0039(11)   0.0100(12)  -0.0028(10)  
F2   0.0554(12)   0.0370(11)   0.0459(12)  -0.0067(10)  -0.0086(12)   0.0057(10)  
F3   0.0698(14)   0.0748(16)   0.0343(12)  -0.0055(12)  -0.0186(12)   0.0220(13)  
C2   0.0378(19)   0.0286(18)   0.0303(19)   0.0002(17)  -0.0099(18)   0.0017(15)  
C3   0.043(2)     0.033(2)     0.044(2)     0.0062(19)  -0.013(2)    -0.0029(17)  
F4   0.0647(14)   0.0337(12)   0.0564(15)   0.0054(11)  -0.0077(12)  -0.0145(11)  
F5   0.0466(12)   0.0647(15)   0.0792(15)   0.0240(13)  -0.0309(13)  -0.0199(13)  
F6   0.0506(13)   0.0471(12)   0.0568(14)   0.0051(11)   0.0125(11)  -0.0025(11)  
C4   0.0357(19)   0.0303(18)   0.042(2)     0.0000(18)  -0.0072(18)   0.0013(16)  
N5   0.0418(17)   0.0287(14)   0.0398(18)   0.0044(14)  -0.0054(16)  -0.0055(14)  
C6   0.052(2)     0.0350(18)   0.045(2)    -0.0003(19)  -0.016(2)    -0.0003(17)  
C7   0.073(3)     0.035(2)     0.061(3)    -0.009(2)    -0.018(2)     0.014(2)    
C8   0.118(4)     0.053(3)     0.091(4)    -0.019(3)    -0.017(4)     0.034(3)    
C9   0.182(7)     0.118(5)     0.099(5)    -0.036(4)    -0.014(5)     0.073(5)    
C10  0.050(2)     0.039(2)     0.044(2)     0.0155(19)  -0.007(2)    -0.0029(18)  
C11  0.057(2)     0.048(2)     0.076(3)     0.034(2)    -0.002(3)    -0.005(2)    
C12  0.050(3)     0.056(3)     0.072(3)     0.027(2)     0.009(3)    -0.009(2)    
C13  0.058(3)     0.066(3)     0.095(4)     0.041(3)     0.001(3)    -0.019(2)    


#----------------------------------------------------------------------------#
#                   MOLECULAR GEOMETRY                                       #
#----------------------------------------------------------------------------#

_geom_special_details
;
 All esds (except the esd in the dihedral angle between two l.s. planes)
 are estimated using the full covariance matrix.  The cell esds are taken
 into account individually in the estimation of esds in distances, angles
 and torsion angles; correlations between esds in cell parameters are only
 used when they are defined by crystal symmetry.  An approximate (isotropic)
 treatment of cell esds is used for estimating esds involving l.s. planes.
;
loop_
    _geom_bond_atom_site_label_1
    _geom_bond_atom_site_label_2
    _geom_bond_distance
    _geom_bond_site_symmetry_2
    _geom_bond_publ_flag
K1   O1   2.625(2)    8_667       ?           
K1   O1   2.635(2)    .           ?           
K1   O1   2.765(2)    2_755       ?           
K1   F2   2.928(2)    2_755       ?           
K1   N5   3.031(3)    .           ?           
K1   F1   3.062(2)    .           ?           
K1   C13  3.148(4)    .           ?           
K1   C12  3.192(4)    .           ?           
K1   C6   3.441(3)    .           ?           
K1   C2   3.459(3)    .           ?           
K1   K1   3.7568(12)  7_647       ?           
K1   K1   3.7568(12)  8_667       ?           
O1   C2   1.347(3)    .           ?           
O1   K1   2.625(2)    7_647       ?           
O1   K1   2.765(2)    2_755       ?           
C1   F1   1.339(4)    .           ?           
C1   F3   1.339(4)    .           ?           
C1   F2   1.359(4)    .           ?           
C1   C2   1.542(5)    .           ?           
F2   K1   2.928(2)    2_755       ?           
C2   C3   1.544(5)    .           ?           
C2   C4   1.566(4)    .           ?           
C3   F5   1.341(4)    .           ?           
C3   F6   1.342(4)    .           ?           
C3   F4   1.349(4)    .           ?           
C4   N5   1.477(4)    .           ?           
C4   H4A  0.99        .           ?           
C4   H4B  0.99        .           ?           
N5   C6   1.469(4)    .           ?           
N5   C10  1.477(4)    .           ?           
C6   C7   1.542(5)    .           ?           
C6   H6A  0.99        .           ?           
C6   H6B  0.99        .           ?           
C7   C8   1.505(6)    .           ?           
C7   H7A  0.99        .           ?           
C7   H7B  0.99        .           ?           
C8   C9   1.293(7)    .           ?           
C8   H8   0.95        .           ?           
C9   H9A  0.95        .           ?           
C9   H9B  0.95        .           ?           
C10  C11  1.518(5)    .           ?           
C10  H10A 0.99        .           ?           
C10  H10B 0.99        .           ?           
C11  C12  1.488(5)    .           ?           
C11  H11A 0.99        .           ?           
C11  H11B 0.99        .           ?           
C12  C13  1.327(6)    .           ?           
C12  H12  0.95        .           ?           
C13  H13A 0.95        .           ?           
C13  H13B 0.95        .           ?           


loop_
    _geom_angle_atom_site_label_1
    _geom_angle_atom_site_label_2
    _geom_angle_atom_site_label_3
    _geom_angle
    _geom_angle_site_symmetry_1
    _geom_angle_site_symmetry_3
    _geom_angle_publ_flag
O1   K1   O1    91.67(7)    8_667   .       ?       
O1   K1   O1    88.82(6)    8_667   2_755   ?       
O1   K1   O1    90.67(6)    .       2_755   ?       
O1   K1   F2   142.70(6)    8_667   2_755   ?       
O1   K1   F2   105.32(6)    .       2_755   ?       
O1   K1   F2    58.67(6)    2_755   2_755   ?       
O1   K1   N5   111.72(7)    8_667   .       ?       
O1   K1   N5    62.34(7)    .       .       ?       
O1   K1   N5   145.40(7)    2_755   .       ?       
F2   K1   N5   105.58(7)    2_755   .       ?       
O1   K1   F1   149.29(6)    8_667   .       ?       
O1   K1   F1    57.63(6)    .       .       ?       
O1   K1   F1    90.62(6)    2_755   .       ?       
F2   K1   F1    57.06(5)    2_755   .       ?       
N5   K1   F1    57.34(6)    .       .       ?       
O1   K1   C13  114.70(11)   8_667   .       ?       
O1   K1   C13  136.53(10)   .       .       ?       
O1   K1   C13  121.99(10)   2_755   .       ?       
F2   K1   C13   74.78(10)   2_755   .       ?       
N5   K1   C13   75.58(10)   .       .       ?       
F1   K1   C13   91.38(10)   .       .       ?       
O1   K1   C12  133.82(10)   8_667   .       ?       
O1   K1   C12  113.97(9)    .       .       ?       
O1   K1   C12  126.24(9)    2_755   .       ?       
F2   K1   C12   68.70(9)    2_755   .       ?       
N5   K1   C12   57.70(9)    .       .       ?       
F1   K1   C12   68.27(9)    .       .       ?       
C13  K1   C12   24.16(10)   .       .       ?       
O1   K1   C6    89.25(8)    8_667   .       ?       
O1   K1   C6    72.54(7)    .       .       ?       
O1   K1   C6   163.03(8)    2_755   .       ?       
F2   K1   C6   127.27(7)    2_755   .       ?       
N5   K1   C6    25.22(7)    .       .       ?       
F1   K1   C6    82.51(7)    .       .       ?       
C13  K1   C6    73.89(11)   .       .       ?       
C12  K1   C6    65.32(10)   .       .       ?       
O1   K1   C2   108.22(7)    8_667   .       ?       
O1   K1   C2    20.33(7)    .       .       ?       
O1   K1   C2   102.40(7)    2_755   .       ?       
F2   K1   C2    97.13(7)    2_755   .       ?       
N5   K1   C2    45.76(7)    .       .       ?       
F1   K1   C2    42.22(7)    .       .       ?       
C13  K1   C2   116.76(10)   .       .       ?       
C12  K1   C2    93.71(9)    .       .       ?       
C6   K1   C2    62.35(8)    .       .       ?       
O1   K1   K1    47.37(5)    8_667   7_647   ?       
O1   K1   K1    44.31(5)    .       7_647   ?       
O1   K1   K1    89.18(4)    2_755   7_647   ?       
F2   K1   K1   138.23(4)    2_755   7_647   ?       
N5   K1   K1    85.63(6)    .       7_647   ?       
F1   K1   K1   101.93(4)    .       7_647   ?       
C13  K1   K1   146.17(10)   .       7_647   ?       
C12  K1   K1   141.98(8)    .       7_647   ?       
C6   K1   K1    77.18(7)    .       7_647   ?       
C2   K1   K1    61.97(6)    .       7_647   ?       
O1   K1   K1    44.53(5)    8_667   8_667   ?       
O1   K1   K1    91.17(5)    .       8_667   ?       
O1   K1   K1    44.30(4)    2_755   8_667   ?       
F2   K1   K1   101.14(4)    2_755   8_667   ?       
N5   K1   K1   146.32(6)    .       8_667   ?       
F1   K1   K1   127.16(4)    .       8_667   ?       
C13  K1   K1   132.03(9)    .       8_667   ?       
C12  K1   K1   154.40(8)    .       8_667   ?       
C6   K1   K1   131.24(7)    .       8_667   ?       
C2   K1   K1   111.19(5)    .       8_667   ?       
K1   K1   K1    60.71(2)    7_647   8_667   ?       
C2   O1   K1   136.87(19)   .       7_647   ?       
C2   O1   K1   116.87(18)   .       .       ?       
K1   O1   K1    91.16(7)    7_647   .       ?       
C2   O1   K1   121.76(18)   .       2_755   ?       
K1   O1   K1    88.33(6)    7_647   2_755   ?       
K1   O1   K1    89.33(6)    .       2_755   ?       
F1   C1   F3   106.7(3)     .       .       ?       
F1   C1   F2   105.5(3)     .       .       ?       
F3   C1   F2   105.2(3)     .       .       ?       
F1   C1   C2   111.1(3)     .       .       ?       
F3   C1   C2   115.3(3)     .       .       ?       
F2   C1   C2   112.4(3)     .       .       ?       
C1   F1   K1   111.71(19)   .       .       ?       
C1   F2   K1   112.56(18)   .       2_755   ?       
O1   C2   C1   109.4(3)     .       .       ?       
O1   C2   C3   109.7(3)     .       .       ?       
C1   C2   C3   108.5(3)     .       .       ?       
O1   C2   C4   115.3(3)     .       .       ?       
C1   C2   C4   109.1(3)     .       .       ?       
C3   C2   C4   104.5(3)     .       .       ?       
O1   C2   K1    42.81(14)   .       .       ?       
C1   C2   K1    89.23(19)   .       .       ?       
C3   C2   K1   152.2(2)     .       .       ?       
C4   C2   K1    88.90(18)   .       .       ?       
F5   C3   F6   106.4(3)     .       .       ?       
F5   C3   F4   106.3(3)     .       .       ?       
F6   C3   F4   106.0(3)     .       .       ?       
F5   C3   C2   114.5(3)     .       .       ?       
F6   C3   C2   110.2(3)     .       .       ?       
F4   C3   C2   112.8(3)     .       .       ?       
N5   C4   C2   114.1(3)     .       .       ?       
N5   C4   H4A  108.7        .       .       ?       
C2   C4   H4A  108.7        .       .       ?       
N5   C4   H4B  108.7        .       .       ?       
C2   C4   H4B  108.7        .       .       ?       
H4A  C4   H4B  107.6        .       .       ?       
C6   N5   C10  113.9(3)     .       .       ?       
C6   N5   C4   110.6(3)     .       .       ?       
C10  N5   C4   111.4(3)     .       .       ?       
C6   N5   K1    93.22(18)   .       .       ?       
C10  N5   K1   117.9(2)     .       .       ?       
C4   N5   K1   108.53(17)   .       .       ?       
N5   C6   C7   116.9(3)     .       .       ?       
N5   C6   K1    61.56(16)   .       .       ?       
C7   C6   K1   178.5(3)     .       .       ?       
N5   C6   H6A  108.1        .       .       ?       
C7   C6   H6A  108.1        .       .       ?       
K1   C6   H6A   72.7        .       .       ?       
N5   C6   H6B  108.1        .       .       ?       
C7   C6   H6B  108.1        .       .       ?       
K1   C6   H6B   72.8        .       .       ?       
H6A  C6   H6B  107.3        .       .       ?       
C8   C7   C6   111.3(3)     .       .       ?       
C8   C7   H7A  109.4        .       .       ?       
C6   C7   H7A  109.4        .       .       ?       
C8   C7   H7B  109.4        .       .       ?       
C6   C7   H7B  109.4        .       .       ?       
H7A  C7   H7B  108          .       .       ?       
C9   C8   C7   125.9(6)     .       .       ?       
C9   C8   H8   117          .       .       ?       
C7   C8   H8   117          .       .       ?       
C8   C9   H9A  120          .       .       ?       
C8   C9   H9B  120          .       .       ?       
H9A  C9   H9B  120          .       .       ?       
N5   C10  C11  112.9(3)     .       .       ?       
N5   C10  H10A 109          .       .       ?       
C11  C10  H10A 109          .       .       ?       
N5   C10  H10B 109          .       .       ?       
C11  C10  H10B 109          .       .       ?       
H10A C10  H10B 107.8        .       .       ?       
C12  C11  C10  114.3(3)     .       .       ?       
C12  C11  H11A 108.7        .       .       ?       
C10  C11  H11A 108.7        .       .       ?       
C12  C11  H11B 108.7        .       .       ?       
C10  C11  H11B 108.7        .       .       ?       
H11A C11  H11B 107.6        .       .       ?       
C13  C12  C11  125.8(5)     .       .       ?       
C13  C12  K1    76.1(2)     .       .       ?       
C11  C12  K1   113.4(2)     .       .       ?       
C13  C12  H12  117.1        .       .       ?       
C11  C12  H12  117.1        .       .       ?       
K1   C12  H12   80.1        .       .       ?       
C12  C13  K1    79.8(2)     .       .       ?       
C12  C13  H13A 120          .       .       ?       
K1   C13  H13A 111.5        .       .       ?       
C12  C13  H13B 120          .       .       ?       
K1   C13  H13B  79.1        .       .       ?       
H13A C13  H13B 120          .       .       ?       


loop_
    _geom_torsion_atom_site_label_1
    _geom_torsion_atom_site_label_2
    _geom_torsion_atom_site_label_3
    _geom_torsion_atom_site_label_4
    _geom_torsion
    _geom_torsion_site_symmetry_1
    _geom_torsion_site_symmetry_2
    _geom_torsion_site_symmetry_3
    _geom_torsion_site_symmetry_4
    _geom_torsion_publ_flag
O1   K1   O1   C2    145.2(2)     8_667   .       .       .       ?       
O1   K1   O1   C2   -125.92(19)   2_755   .       .       .       ?       
F2   K1   O1   C2    -68.3(2)     2_755   .       .       .       ?       
N5   K1   O1   C2     31.50(19)   .       .       .       .       ?       
F1   K1   O1   C2    -35.60(19)   .       .       .       .       ?       
C13  K1   O1   C2     15.6(3)     .       .       .       .       ?       
C12  K1   O1   C2      4.8(2)     .       .       .       .       ?       
C6   K1   O1   C2     56.6(2)     .       .       .       .       ?       
K1   K1   O1   C2    145.9(2)     7_647   .       .       .       ?       
K1   K1   O1   C2   -170.22(19)   8_667   .       .       .       ?       
O1   K1   O1   K1     -0.70(7)    8_667   .       .       7_647   ?       
O1   K1   O1   K1     88.14(7)    2_755   .       .       7_647   ?       
F2   K1   O1   K1    145.72(6)    2_755   .       .       7_647   ?       
N5   K1   O1   K1   -114.45(8)    .       .       .       7_647   ?       
F1   K1   O1   K1    178.45(8)    .       .       .       7_647   ?       
C13  K1   O1   K1   -130.39(15)   .       .       .       7_647   ?       
C12  K1   O1   K1   -141.15(10)   .       .       .       7_647   ?       
C6   K1   O1   K1    -89.39(8)    .       .       .       7_647   ?       
C2   K1   O1   K1   -145.9(2)     .       .       .       7_647   ?       
K1   K1   O1   K1     43.84(5)    8_667   .       .       7_647   ?       
O1   K1   O1   K1    -89.02(7)    8_667   .       .       2_755   ?       
O1   K1   O1   K1     -0.18(9)    2_755   .       .       2_755   ?       
F2   K1   O1   K1     57.41(7)    2_755   .       .       2_755   ?       
N5   K1   O1   K1    157.24(9)    .       .       .       2_755   ?       
F1   K1   O1   K1     90.13(7)    .       .       .       2_755   ?       
C13  K1   O1   K1    141.29(14)   .       .       .       2_755   ?       
C12  K1   O1   K1    130.53(10)   .       .       .       2_755   ?       
C6   K1   O1   K1   -177.71(9)    .       .       .       2_755   ?       
C2   K1   O1   K1    125.7(2)     .       .       .       2_755   ?       
K1   K1   O1   K1    -88.32(6)    7_647   .       .       2_755   ?       
K1   K1   O1   K1    -44.48(6)    8_667   .       .       2_755   ?       
F3   C1   F1   K1    152.54(19)   .       .       .       .       ?       
F2   C1   F1   K1    -95.9(2)     .       .       .       .       ?       
C2   C1   F1   K1     26.1(3)     .       .       .       .       ?       
O1   K1   F1   C1      3.3(2)     8_667   .       .       .       ?       
O1   K1   F1   C1      1.69(18)   .       .       .       .       ?       
O1   K1   F1   C1     92.09(19)   2_755   .       .       .       ?       
F2   K1   F1   C1    143.3(2)     2_755   .       .       .       ?       
N5   K1   F1   C1    -74.03(19)   .       .       .       .       ?       
C13  K1   F1   C1   -145.9(2)     .       .       .       .       ?       
C12  K1   F1   C1   -138.7(2)     .       .       .       .       ?       
C6   K1   F1   C1    -72.3(2)     .       .       .       .       ?       
C2   K1   F1   C1    -15.82(19)   .       .       .       .       ?       
K1   K1   F1   C1      2.80(19)   7_647   .       .       .       ?       
K1   K1   F1   C1     64.9(2)     8_667   .       .       .       ?       
F1   C1   F2   K1     75.5(3)     .       .       .       2_755   ?       
F3   C1   F2   K1   -171.93(18)   .       .       .       2_755   ?       
C2   C1   F2   K1    -45.7(3)     .       .       .       2_755   ?       
K1   O1   C2   C1   -168.7(2)     7_647   .       .       .       ?       
K1   O1   C2   C1     66.3(3)     .       .       .       .       ?       
K1   O1   C2   C1    -41.0(3)     2_755   .       .       .       ?       
K1   O1   C2   C3    -49.8(4)     7_647   .       .       .       ?       
K1   O1   C2   C3   -174.79(19)   .       .       .       .       ?       
K1   O1   C2   C3     77.9(3)     2_755   .       .       .       ?       
K1   O1   C2   C4     67.9(4)     7_647   .       .       .       ?       
K1   O1   C2   C4    -57.1(3)     .       .       .       .       ?       
K1   O1   C2   C4   -164.5(2)     2_755   .       .       .       ?       
K1   O1   C2   K1    125.0(3)     7_647   .       .       .       ?       
K1   O1   C2   K1   -107.3(2)     2_755   .       .       .       ?       
F1   C1   C2   O1    -59.7(3)     .       .       .       .       ?       
F3   C1   C2   O1    178.8(3)     .       .       .       .       ?       
F2   C1   C2   O1     58.2(4)     .       .       .       .       ?       
F1   C1   C2   C3   -179.4(3)     .       .       .       .       ?       
F3   C1   C2   C3     59.1(4)     .       .       .       .       ?       
F2   C1   C2   C3    -61.5(4)     .       .       .       .       ?       
F1   C1   C2   C4     67.3(3)     .       .       .       .       ?       
F3   C1   C2   C4    -54.1(4)     .       .       .       .       ?       
F2   C1   C2   C4   -174.7(3)     .       .       .       .       ?       
F1   C1   C2   K1    -21.2(2)     .       .       .       .       ?       
F3   C1   C2   K1   -142.7(3)     .       .       .       .       ?       
F2   C1   C2   K1     96.7(3)     .       .       .       .       ?       
O1   K1   C2   O1    -36.9(2)     8_667   .       .       .       ?       
O1   K1   C2   O1     56.01(19)   2_755   .       .       .       ?       
F2   K1   C2   O1    115.4(2)     2_755   .       .       .       ?       
N5   K1   C2   O1   -139.8(2)     .       .       .       .       ?       
F1   K1   C2   O1    133.0(2)     .       .       .       .       ?       
C13  K1   C2   O1   -168.1(2)     .       .       .       .       ?       
C12  K1   C2   O1   -175.6(2)     .       .       .       .       ?       
C6   K1   C2   O1   -116.0(2)     .       .       .       .       ?       
K1   K1   C2   O1    -26.31(18)   7_647   .       .       .       ?       
K1   K1   C2   O1     10.5(2)     8_667   .       .       .       ?       
O1   K1   C2   C1   -157.12(17)   8_667   .       .       .       ?       
O1   K1   C2   C1   -120.3(3)     .       .       .       .       ?       
O1   K1   C2   C1    -64.24(19)   2_755   .       .       .       ?       
F2   K1   C2   C1     -4.85(18)   2_755   .       .       .       ?       
N5   K1   C2   C1    100.0(2)     .       .       .       .       ?       
F1   K1   C2   C1     12.71(15)   .       .       .       .       ?       
C13  K1   C2   C1     71.7(2)     .       .       .       .       ?       
C12  K1   C2   C1     64.13(19)   .       .       .       .       ?       
C6   K1   C2   C1    123.7(2)     .       .       .       .       ?       
K1   K1   C2   C1   -146.56(19)   7_647   .       .       .       ?       
K1   K1   C2   C1   -109.76(17)   8_667   .       .       .       ?       
O1   K1   C2   C3    -26.3(5)     8_667   .       .       .       ?       
O1   K1   C2   C3     10.6(4)     .       .       .       .       ?       
O1   K1   C2   C3     66.6(5)     2_755   .       .       .       ?       
F2   K1   C2   C3    126.0(5)     2_755   .       .       .       ?       
N5   K1   C2   C3   -129.2(5)     .       .       .       .       ?       
F1   K1   C2   C3    143.5(5)     .       .       .       .       ?       
C13  K1   C2   C3   -157.5(5)     .       .       .       .       ?       
C12  K1   C2   C3   -165.1(5)     .       .       .       .       ?       
C6   K1   C2   C3   -105.5(5)     .       .       .       .       ?       
K1   K1   C2   C3    -15.8(5)     7_647   .       .       .       ?       
K1   K1   C2   C3     21.0(5)     8_667   .       .       .       ?       
O1   K1   C2   C4     93.73(19)   8_667   .       .       .       ?       
O1   K1   C2   C4    130.6(3)     .       .       .       .       ?       
O1   K1   C2   C4   -173.39(18)   2_755   .       .       .       ?       
F2   K1   C2   C4   -113.99(19)   2_755   .       .       .       ?       
N5   K1   C2   C4     -9.16(18)   .       .       .       .       ?       
F1   K1   C2   C4    -96.4(2)     .       .       .       .       ?       
C13  K1   C2   C4    -37.5(2)     .       .       .       .       ?       
C12  K1   C2   C4    -45.0(2)     .       .       .       .       ?       
C6   K1   C2   C4     14.57(18)   .       .       .       .       ?       
K1   K1   C2   C4    104.29(19)   7_647   .       .       .       ?       
K1   K1   C2   C4    141.09(18)   8_667   .       .       .       ?       
O1   C2   C3   F5    178.5(3)     .       .       .       .       ?       
C1   C2   C3   F5    -62.1(4)     .       .       .       .       ?       
C4   C2   C3   F5     54.2(4)     .       .       .       .       ?       
K1   C2   C3   F5    170.9(3)     .       .       .       .       ?       
O1   C2   C3   F6     58.5(3)     .       .       .       .       ?       
C1   C2   C3   F6    178.0(3)     .       .       .       .       ?       
C4   C2   C3   F6    -65.7(3)     .       .       .       .       ?       
K1   C2   C3   F6     50.9(6)     .       .       .       .       ?       
O1   C2   C3   F4    -59.8(4)     .       .       .       .       ?       
C1   C2   C3   F4     59.7(4)     .       .       .       .       ?       
C4   C2   C3   F4    176.0(3)     .       .       .       .       ?       
K1   C2   C3   F4    -67.4(6)     .       .       .       .       ?       
O1   C2   C4   N5     49.7(4)     .       .       .       .       ?       
C1   C2   C4   N5    -73.9(4)     .       .       .       .       ?       
C3   C2   C4   N5    170.2(3)     .       .       .       .       ?       
K1   C2   C4   N5     14.9(3)     .       .       .       .       ?       
C2   C4   N5   C6   -118.9(3)     .       .       .       .       ?       
C2   C4   N5   C10   113.4(3)     .       .       .       .       ?       
C2   C4   N5   K1    -18.0(3)     .       .       .       .       ?       
O1   K1   N5   C6     28.5(2)     8_667   .       .       .       ?       
O1   K1   N5   C6    108.5(2)     .       .       .       .       ?       
O1   K1   N5   C6    151.08(18)   2_755   .       .       .       ?       
F2   K1   N5   C6   -152.05(18)   2_755   .       .       .       ?       
F1   K1   N5   C6    176.1(2)     .       .       .       .       ?       
C13  K1   N5   C6    -82.7(2)     .       .       .       .       ?       
C12  K1   N5   C6   -100.5(2)     .       .       .       .       ?       
C2   K1   N5   C6    123.2(2)     .       .       .       .       ?       
K1   K1   N5   C6     68.90(18)   7_647   .       .       .       ?       
K1   K1   N5   C6     66.7(2)     8_667   .       .       .       ?       
O1   K1   N5   C10   147.8(2)     8_667   .       .       .       ?       
O1   K1   N5   C10  -132.2(2)     .       .       .       .       ?       
O1   K1   N5   C10   -89.6(2)     2_755   .       .       .       ?       
F2   K1   N5   C10   -32.8(2)     2_755   .       .       .       ?       
F1   K1   N5   C10   -64.7(2)     .       .       .       .       ?       
C13  K1   N5   C10    36.6(2)     .       .       .       .       ?       
C12  K1   N5   C10    18.7(2)     .       .       .       .       ?       
C6   K1   N5   C10   119.3(3)     .       .       .       .       ?       
C2   K1   N5   C10  -117.5(2)     .       .       .       .       ?       
K1   K1   N5   C10  -171.8(2)     7_647   .       .       .       ?       
K1   K1   N5   C10  -174.04(18)   8_667   .       .       .       ?       
O1   K1   N5   C4    -84.4(2)     8_667   .       .       .       ?       
O1   K1   N5   C4     -4.42(19)   .       .       .       .       ?       
O1   K1   N5   C4     38.1(3)     2_755   .       .       .       ?       
F2   K1   N5   C4     95.0(2)     2_755   .       .       .       ?       
F1   K1   N5   C4     63.1(2)     .       .       .       .       ?       
C13  K1   N5   C4    164.3(2)     .       .       .       .       ?       
C12  K1   N5   C4    146.5(3)     .       .       .       .       ?       
C6   K1   N5   C4   -112.9(3)     .       .       .       .       ?       
C2   K1   N5   C4     10.26(19)   .       .       .       .       ?       
K1   K1   N5   C4    -44.0(2)     7_647   .       .       .       ?       
K1   K1   N5   C4    -46.3(3)     8_667   .       .       .       ?       
C10  N5   C6   C7     57.4(4)     .       .       .       .       ?       
C4   N5   C6   C7    -69.0(4)     .       .       .       .       ?       
K1   N5   C6   C7    179.9(3)     .       .       .       .       ?       
C10  N5   C6   K1   -122.5(3)     .       .       .       .       ?       
C4   N5   C6   K1    111.2(2)     .       .       .       .       ?       
O1   K1   C6   N5   -153.68(18)   8_667   .       .       .       ?       
O1   K1   C6   N5    -61.68(18)   .       .       .       .       ?       
O1   K1   C6   N5    -70.2(4)     2_755   .       .       .       ?       
F2   K1   C6   N5     34.6(2)     2_755   .       .       .       ?       
F1   K1   C6   N5     -3.33(18)   .       .       .       .       ?       
C13  K1   C6   N5     90.3(2)     .       .       .       .       ?       
C12  K1   C6   N5     66.1(2)     .       .       .       .       ?       
C2   K1   C6   N5    -42.58(17)   .       .       .       .       ?       
K1   K1   C6   N5   -107.44(18)   7_647   .       .       .       ?       
K1   K1   C6   N5   -137.36(16)   8_667   .       .       .       ?       
O1   K1   C6   C7   -158(10)      8_667   .       .       .       ?       
O1   K1   C6   C7    -66(10)      .       .       .       .       ?       
O1   K1   C6   C7    -74(10)      2_755   .       .       .       ?       
F2   K1   C6   C7     31(10)      2_755   .       .       .       ?       
N5   K1   C6   C7     -4(10)      .       .       .       .       ?       
F1   K1   C6   C7     -7(10)      .       .       .       .       ?       
C13  K1   C6   C7     86(10)      .       .       .       .       ?       
C12  K1   C6   C7     62(10)      .       .       .       .       ?       
C2   K1   C6   C7    -47(10)      .       .       .       .       ?       
K1   K1   C6   C7   -111(10)      7_647   .       .       .       ?       
K1   K1   C6   C7   -141(10)      8_667   .       .       .       ?       
N5   C6   C7   C8    177.5(4)     .       .       .       .       ?       
K1   C6   C7   C8   -18E1(10)     .       .       .       .       ?       
C6   C7   C8   C9   -119.4(6)     .       .       .       .       ?       
C6   N5   C10  C11    60.4(4)     .       .       .       .       ?       
C4   N5   C10  C11  -173.6(3)     .       .       .       .       ?       
K1   N5   C10  C11   -47.2(4)     .       .       .       .       ?       
N5   C10  C11  C12    57.9(5)     .       .       .       .       ?       
C10  C11  C12  C13  -127.6(4)     .       .       .       .       ?       
C10  C11  C12  K1    -38.2(5)     .       .       .       .       ?       
O1   K1   C12  C13    43.6(3)     8_667   .       .       .       ?       
O1   K1   C12  C13   161.7(3)     .       .       .       .       ?       
O1   K1   C12  C13   -88.3(3)     2_755   .       .       .       ?       
F2   K1   C12  C13  -100.4(3)     2_755   .       .       .       ?       
N5   K1   C12  C13   133.6(3)     .       .       .       .       ?       
F1   K1   C12  C13  -162.2(3)     .       .       .       .       ?       
C6   K1   C12  C13   106.2(3)     .       .       .       .       ?       
C2   K1   C12  C13   163.4(3)     .       .       .       .       ?       
K1   K1   C12  C13   116.4(3)     7_647   .       .       .       ?       
K1   K1   C12  C13   -29.9(4)     8_667   .       .       .       ?       
O1   K1   C12  C11   -79.8(3)     8_667   .       .       .       ?       
O1   K1   C12  C11    38.3(4)     .       .       .       .       ?       
O1   K1   C12  C11   148.3(3)     2_755   .       .       .       ?       
F2   K1   C12  C11   136.2(3)     2_755   .       .       .       ?       
N5   K1   C12  C11    10.2(3)     .       .       .       .       ?       
F1   K1   C12  C11    74.4(3)     .       .       .       .       ?       
C13  K1   C12  C11  -123.4(5)     .       .       .       .       ?       
C6   K1   C12  C11   -17.2(3)     .       .       .       .       ?       
C2   K1   C12  C11    40.0(3)     .       .       .       .       ?       
K1   K1   C12  C11    -7.0(4)     7_647   .       .       .       ?       
K1   K1   C12  C11  -153.3(2)     8_667   .       .       .       ?       
C11  C12  C13  K1    109.1(4)     .       .       .       .       ?       
O1   K1   C13  C12  -146.8(3)     8_667   .       .       .       ?       
O1   K1   C13  C12   -24.6(4)     .       .       .       .       ?       
O1   K1   C13  C12   108.1(3)     2_755   .       .       .       ?       
F2   K1   C13  C12    71.7(3)     2_755   .       .       .       ?       
N5   K1   C13  C12   -39.2(3)     .       .       .       .       ?       
F1   K1   C13  C12    16.5(3)     .       .       .       .       ?       
C6   K1   C13  C12   -65.3(3)     .       .       .       .       ?       
C2   K1   C13  C12   -18.7(3)     .       .       .       .       ?       
K1   K1   C13  C12   -97.5(3)     7_647   .       .       .       ?       
K1   K1   C13  C12   163.1(2)     8_667   .       .       .       ?       


#----------------------------------------------------------------------------#
# END OF CIF FILE FOR SR437                                                  #
#----------------------------------------------------------------------------#
