# Supplementary material
Source: MDPI journal article supplement (https://www.mdpi.com/2304-6740/5/1/13)
Supplement: s1 [file s1 › inorganics-05-00013-supplementary/Complex_4_SR681_CIFfile.cif]

#
#
#----------------------------------------------------------------------------#
#           CIF file created and formatted by CRYSCALC (December 2015)       #
#----------------------------------------------------------------------------#
# Input CIF files:                                                           #
#  1. SR681.cif                                                                #
#  2. import.cif                                                             #
# Date of diffraction experiment : 21jan16                                   #
#----------------------------------------------------------------------------#
#

data_SR681


#----------------------------------------------------------------------------#
#                              CHEMICAL_INFORMATION                          #
#----------------------------------------------------------------------------#
 

_chemical_name_systematic
;
 ?
;
_chemical_formula_moiety              'C32 H48 F24 K4 N4 O4'
_chemical_formula_sum                 'C32 H48 F24 K4 N4 O4'
_chemical_formula_weight               1165.14
_chemical_compound_source             'synthesis as described'

#----------------------------------------------------------------------------#
#                              UNIT CELL INFORMATION                         #
#----------------------------------------------------------------------------#
 

_space_group_crystal_system              Monoclinic
_space_group_name_H-M_alt                'P 21/n'
_space_group_name_Hall                   '-P 2yn'
_space_group_IT_number                    14
loop_
  _space_group_symop_operation_xyz
 'x, y, z'
 '-x+1/2, y+1/2, -z+1/2'
 '-x, -y, -z'
 'x-1/2, -y-1/2, z-1/2'

_cell_length_a                         18.9136(8)
_cell_length_b                         10.7740(5)
_cell_length_c                         24.7556(9)
_cell_angle_alpha                      90
_cell_angle_beta                       108.265(2)
_cell_angle_gamma                      90
_cell_volume                           4790.4(4)
_cell_formula_units_Z                 4
_cell_measurement_temperature         150(2)
_cell_measurement_reflns_used            9912
_cell_measurement_theta_min              2.50
_cell_measurement_theta_max             27.47
_cell_measurement_wavelength           0.71073

#----------------------------------------------------------------------------#
#                               CRYSTAL INFORMATION                          #
#----------------------------------------------------------------------------#
 
_exptl_crystal_description             prism
_exptl_crystal_colour                  colourless
_exptl_crystal_size_max                 0.410
_exptl_crystal_size_mid                 0.150
_exptl_crystal_size_min                 0.120
_exptl_crystal_density_meas           ?                               
_exptl_crystal_density_diffrn         1.616                           
_exptl_crystal_density_method         ?                               
_exptl_crystal_F_000                  2368                            
_exptl_special_details
;
 ?
;

#----------------------------------------------------------------------------#
#                              ABSORPTION CORRECTION                         #
#----------------------------------------------------------------------------#
 
_exptl_absorpt_coefficient_mu                         0.505
_exptl_absorpt_correction_type                       multi-scan
_exptl_absorpt_process_details
;
  [Sheldrick, G.M. (2014). SADABS Bruker AXS Inc., Madison, Wisconsin, USA]
;
_exptl_absorpt_correction_T_min                         0.840
_exptl_absorpt_correction_T_max                         0.941

#----------------------------------------------------------------------------#
#                                 DATA COLLECTION                            #
#----------------------------------------------------------------------------#
 
_diffrn_measurement_device_type        'D8 VENTURE Bruker AXS'
_diffrn_measurement_method             'rotation images'
_diffrn_detector                       '(CMOS) PHOTON 100'
_diffrn_ambient_temperature             150(2)
_diffrn_radiation_wavelength            0.71073
_diffrn_radiation_type                  MoK\a
_diffrn_radiation_probe                 x-ray
_diffrn_radiation_source                'Incoatec microfocus sealed tube'
_diffrn_radiation_monochromator         'multilayer monochromator'
_diffrn_reflns_av_r_equivalents         0.0550
_diffrn_reflns_av_uneti/neti            0.0358
_diffrn_reflns_number                   57371
_diffrn_reflns_limit_h_min              -24
_diffrn_reflns_limit_h_max              24
_diffrn_reflns_limit_k_min              -13
_diffrn_reflns_limit_k_max              13
_diffrn_reflns_limit_l_min              -32
_diffrn_reflns_limit_l_max              31
_diffrn_reflns_theta_min                2.953
_diffrn_reflns_theta_max                27.483
_diffrn_reflns_theta_full               25.242
_diffrn_measured_fraction_theta_full    0.998
_diffrn_measured_fraction_theta_max     0.998
_reflns_number_total                    10958
_reflns_number_gt                       8014
_reflns_threshold_expression            >2sigma(I)

#----------------------------------------------------------------------------#
#                             COMPUTER PROGRAMS USED                         #
#----------------------------------------------------------------------------#
 
_computing_data_collection       'SAINT (Bruker, 2014); XPREP (Sheldrick, 2014)'
_computing_cell_refinement       'APEX2 (Bruker, 2014); SAINT (Bruker, 2014)'
_computing_data_reduction        'SAINT (Bruker, 2014); XPREP (Sheldrick, 2014)'
_computing_structure_solution    'SIR97 (Altomare et al., 1999)'
_computing_structure_refinement  'SHELXL-2014/7 (Sheldrick, 2014)'
_computing_molecular_graphics    'Ortep-3 for Windows (Farrugia, 1997)'
_computing_publication_material  'CRYSCALc (T. Roisnel, local program, 2015)'

#----------------------------------------------------------------------------#
#                             REFINEMENT INFORMATION                         #
#----------------------------------------------------------------------------#
 
_refine_special_details
;
Refinement of F^2^ against ALL reflections.  The weighted R-factor wR and
goodness of fit S are based on F^2^, conventional R-factors R are based
on F, with F set to zero for negative F^2^. The threshold expression of
F^2^ > 2sigma(F^2^) is used only for calculating R-factors(gt) etc. and is
not relevant to the choice of reflections for refinement.  R-factors based
on F^2^ are statistically about twice as large as those based on F, and R-
factors based on ALL data will be even larger.
;
_refine_ls_structure_factor_coef        Fsqd
_refine_ls_matrix_type                  full
_refine_ls_weighting_scheme             calc
_refine_ls_weighting_details            
        'w=1/[\s^2^(Fo^2^)+(0.0554P)^2^+2.6687P] where P=(Fo^2^+2Fc^2^)/3'
_atom_sites_solution_primary            ?
_atom_sites_solution_secondary          ?
_atom_sites_solution_hydrogens          geom
_refine_ls_hydrogen_treatment           constr
_refine_ls_extinction_method            none
_refine_ls_extinction_coef              .
_refine_ls_number_reflns                10958
_refine_ls_number_parameters            668
_refine_ls_number_restraints            4
_refine_ls_R_factor_all                 0.0681
_refine_ls_R_factor_gt                  0.0402
_refine_ls_wR_factor_ref                0.1166
_refine_ls_wR_factor_gt                 0.0968
_refine_ls_goodness_of_fit_ref          1.056
_refine_ls_restrained_S_all             1.059
_refine_ls_shift/su_max                 0.001
_refine_ls_shift/su_mean                0.000
_refine_diff_density_max                0.844
_refine_diff_density_min                -0.667
_refine_diff_density_rms                0.107

_iucr_refine_instructions_details
;
 .res SHELXL file: SR681.res
.................................................................

    SR681.res created by SHELXL-2014/7

TITL import_a.res in P2(1)/n
CELL  0.71073  18.9136  10.7740  24.7556   90.000  108.265   90.000
ZERR    4.00   0.0008   0.0005   0.0009    0.000    0.002    0.000
LATT   1
SYMM  1/2 - X, 1/2 + Y, 1/2 - Z
SFAC  C    H    O    F    K    N
UNIT  128  192  16   96   16   16
MERG   2
EADP C27A C27B
EXYZ C27A C27B
DFIX     1.500   0.020 N2 C17
DFIX     1.500   0.020 C17 C18
DFIX     2.500   0.020 N2 C18
EADP C17A C18A C17B C18B
EADP C15A C15B
DFIX     1.450   0.020 C15B N2
DFIX     1.500   0.020 C15B C16B
DFIX     1.500   0.020 C25B N3
DFIX     1.500   0.020 C25B C26B
FMAP   2
PLAN   20
SIZE     0.03   0.07   0.09
ACTA
BOND   $H
CONF
LIST   4
WPDB  -2
L.S.  14
TEMP  -123.00
WGHT    0.055400    2.668700
FVAR       0.39490   0.43761   0.55573   0.69304   0.60117
K1    5    0.520690    0.502324    0.723954    11.00000    0.02824    0.01981 =
         0.02881    0.00138    0.01365    0.00354
K2    5    0.312552    0.575545    0.668147    11.00000    0.03021    0.02556 =
         0.03243    0.00187    0.01583    0.00258
K3    5    0.386954    0.258384    0.625062    11.00000    0.03501    0.01899 =
         0.03047    0.00077    0.01239    0.00044
K4    5    0.429476    0.566789    0.563763    11.00000    0.03109    0.02476 =
         0.02792    0.00510    0.01575    0.00195
O1    3    0.437262    0.674329    0.663405    11.00000    0.03205    0.01457 =
         0.03467    0.00344    0.01653    0.00072
N1    6    0.513131    0.757839    0.778820    11.00000    0.04023    0.01926 =
         0.03640   -0.00456    0.01704   -0.00422
C1    1    0.459222    0.793254    0.672957    11.00000    0.04270    0.01507 =
         0.03660    0.00265    0.02246    0.00102
C2    1    0.399217    0.875224    0.631389    11.00000    0.05982    0.02346 =
         0.04758    0.00891    0.03047    0.01110
C3    1    0.533221    0.811704    0.660164    11.00000    0.04831    0.02251 =
         0.04793   -0.00513    0.02490   -0.00850
C4    1    0.468251    0.841306    0.734224    11.00000    0.05831    0.01741 =
         0.04368   -0.00152    0.02512    0.00536
AFIX  23
H4A   2    0.492062    0.924159    0.739149    11.00000   -1.20000
H4B   2    0.418331    0.850847    0.738711    11.00000   -1.20000
AFIX   0
C5    1    0.581470    0.818803    0.815381    11.00000    0.05854    0.04018 =
         0.05294   -0.01943    0.02361   -0.01856
AFIX  23
H5A   2    0.567268    0.886164    0.837152    11.00000   -1.20000
H5B   2    0.608072    0.857000    0.790921    11.00000   -1.20000
AFIX   0
C6    1    0.633481    0.730900    0.856454    11.00000    0.04982    0.07757 =
         0.06745   -0.02507    0.00241   -0.00246
AFIX 137
H6A   2    0.610856    0.704006    0.885105    11.00000   -1.50000
H6B   2    0.680690    0.773141    0.875244    11.00000   -1.50000
H6C   2    0.642717    0.658394    0.835720    11.00000   -1.50000
AFIX   0
C7    1    0.468687    0.700538    0.811036    11.00000    0.04767    0.03106 =
         0.04358    0.00195    0.02213   -0.00272
AFIX  23
H7A   2    0.498423    0.632639    0.834300    11.00000   -1.20000
H7B   2    0.424265    0.662277    0.783569    11.00000   -1.20000
AFIX   0
C8    1    0.442242    0.785404    0.850459    11.00000    0.07045    0.06481 =
         0.05593    0.00094    0.03938    0.01226
AFIX 137
H8A   2    0.485424    0.816353    0.880903    11.00000   -1.50000
H8B   2    0.409751    0.738562    0.867090    11.00000   -1.50000
H8C   2    0.414623    0.855614    0.828616    11.00000   -1.50000
AFIX   0
F1    4    0.333917    0.861443    0.640456    11.00000    0.05187    0.05725 =
         0.06134    0.02285    0.02925    0.02426
F2    4    0.414116    0.998809    0.635811    11.00000    0.09794    0.01889 =
         0.06730    0.01333    0.04058    0.01666
F3    4    0.387878    0.845892    0.576767    11.00000    0.07150    0.04239 =
         0.04043    0.01169    0.02241    0.01883
F4    4    0.557634    0.929931    0.664578    11.00000    0.07262    0.02923 =
         0.09594   -0.00723    0.04447   -0.02339
F5    4    0.529020    0.774347    0.607185    11.00000    0.05659    0.05307 =
         0.04998   -0.00659    0.03609   -0.01487
F6    4    0.587998    0.744821    0.695171    11.00000    0.03778    0.04420 =
         0.05702   -0.00813    0.02258   -0.00029
O2    3    0.394757    0.380307    0.725166    11.00000    0.03413    0.02084 =
         0.02896    0.00415    0.01950    0.00024
N2    6    0.432322    0.294972    0.877833    11.00000    0.06027    0.05132 =
         0.02880    0.01119    0.01506    0.00543
C11   1    0.377559    0.319945    0.767914    11.00000    0.02638    0.01789 =
         0.02814    0.00413    0.01697    0.00102
C12   1    0.300283    0.362229    0.768679    11.00000    0.03816    0.06488 =
         0.03813    0.01523    0.02240    0.01129
C13   1    0.374256    0.179001    0.755910    11.00000    0.05859    0.03080 =
         0.03338    0.00009    0.01722   -0.01655
C14   1    0.437315    0.348893    0.825472    11.00000    0.03639    0.02861 =
         0.03325    0.00044    0.01523   -0.00009
AFIX  23
H14A  2    0.486066    0.324161    0.821900    11.00000   -1.20000
H14B  2    0.438630    0.440158    0.830335    11.00000   -1.20000
AFIX   0
PART    1
C15A  1    0.492806    0.194457    0.896506    41.00000    0.03856    0.05376 =
         0.03941    0.01684   -0.00027   -0.00750
AFIX  23
H15A  2    0.494504    0.145829    0.863003    41.00000   -1.20000
H15B  2    0.542038    0.233945    0.913594    41.00000   -1.20000
AFIX   0
C16A  1    0.475905    0.108920    0.939654    41.00000    0.04100    0.08875 =
         0.08305    0.05620   -0.00619   -0.01545
AFIX 137
H16A  2    0.478760    0.155927    0.974165    41.00000   -1.50000
H16B  2    0.512314    0.041195    0.949138    41.00000   -1.50000
H16C  2    0.425737    0.074444    0.923501    41.00000   -1.50000
AFIX   0
PART    2
C15B  1    0.489308    0.229544    0.916407   -41.00000    0.03856    0.05376 =
         0.03941    0.01684   -0.00027   -0.00750
AFIX  23
H15C  2    0.479984    0.225931    0.953558   -41.00000   -1.20000
H15D  2    0.537125    0.273221    0.921993   -41.00000   -1.20000
AFIX   0
C16B  1    0.494458    0.103572    0.896126   -41.00000    0.06056    0.04405 =
         0.07280    0.01345    0.01198    0.00387
AFIX 137
H16D  2    0.446429    0.061573    0.888958   -41.00000   -1.50000
H16E  2    0.532959    0.057587    0.925001   -41.00000   -1.50000
H16F  2    0.507441    0.107052    0.860815   -41.00000   -1.50000
AFIX   0
PART    1
C17A  1    0.445871    0.386848    0.922555    31.00000    0.14738    0.12247 =
         0.05729   -0.03010    0.03820   -0.00193
AFIX  23
H17A  2    0.466681    0.345036    0.959790    31.00000   -1.20000
H17B  2    0.483564    0.446577    0.918328    31.00000   -1.20000
AFIX   0
C18A  1    0.381992    0.451823    0.922247    31.00000    0.14738    0.12247 =
         0.05729   -0.03010    0.03820   -0.00193
AFIX 137
H18A  2    0.344391    0.444180    0.884751    31.00000   -1.50000
H18B  2    0.394363    0.539579    0.930490    31.00000   -1.50000
H18C  2    0.362324    0.417380    0.951284    31.00000   -1.50000
AFIX   0
PART    2
C17B  1    0.402709    0.382256    0.911104   -31.00000    0.14738    0.12247 =
         0.05729   -0.03010    0.03820   -0.00193
AFIX  23
H17C  2    0.381245    0.335418    0.936644   -31.00000   -1.20000
H17D  2    0.362594    0.432768    0.885098   -31.00000   -1.20000
AFIX   0
C18B  1    0.463333    0.465502    0.945582   -31.00000    0.14738    0.12247 =
         0.05729   -0.03010    0.03820   -0.00193
AFIX 137
H18D  2    0.506744    0.415462    0.966019   -31.00000   -1.50000
H18E  2    0.445714    0.511649    0.972992   -31.00000   -1.50000
H18F  2    0.477288    0.523976    0.920341   -31.00000   -1.50000
AFIX   0
PART    0
F11   4    0.273846    0.304578    0.806225    11.00000    0.04517    0.11541 =
         0.06038    0.02879    0.03765    0.00814
F12   4    0.302010    0.484541    0.780734    11.00000    0.07111    0.07434 =
         0.06941    0.01592    0.03923    0.04507
F13   4    0.248307    0.351419    0.718178    11.00000    0.03159    0.14163 =
         0.04804    0.01846    0.00948    0.01047
F14   4    0.354774    0.107463    0.793025    11.00000    0.09473    0.04118 =
         0.04509    0.00889    0.02137   -0.03001
F15   4    0.326111    0.151332    0.704181    11.00000    0.09104    0.05191 =
         0.03769   -0.00618    0.01668   -0.03928
F16   4    0.440491    0.138723    0.754907    11.00000    0.07909    0.02835 =
         0.07605   -0.00528    0.03380    0.01310
O3    3    0.314108    0.450378    0.573609    11.00000    0.02529    0.02859 =
         0.02768    0.00272    0.00931    0.00004
N3    6    0.276740    0.225818    0.500075    11.00000    0.05701    0.03669 =
         0.03457   -0.00406    0.00857   -0.00360
C21   1    0.245910    0.433245    0.535896    11.00000    0.02813    0.03783 =
         0.02555    0.00601    0.00955   -0.00017
C22   1    0.193958    0.377734    0.567107    11.00000    0.03137    0.04925 =
         0.02896    0.00075    0.00980   -0.00570
C23   1    0.215738    0.561289    0.511182    11.00000    0.03317    0.05074 =
         0.03703    0.01183    0.01237    0.00703
C24   1    0.244348    0.348639    0.484280    11.00000    0.04140    0.04410 =
         0.02617    0.00368    0.01041   -0.00462
AFIX  23
H24A  2    0.192032    0.338673    0.459928    11.00000   -1.20000
H24B  2    0.271666    0.390949    0.461370    11.00000   -1.20000
AFIX   0
PART    1
C25A  1    0.332976    0.208889    0.465976    51.00000    0.04814    0.02943 =
         0.03824    0.01052    0.01558    0.00136
AFIX  23
H25A  2    0.305700    0.213332    0.424747    51.00000   -1.20000
H25B  2    0.369535    0.277638    0.475424    51.00000   -1.20000
AFIX   0
C26A  1    0.375281    0.082620    0.479398    51.00000    0.06575    0.03105 =
         0.06162   -0.00171    0.03725   -0.00165
AFIX 137
H26A  2    0.398245    0.074142    0.520616    51.00000   -1.50000
H26B  2    0.414028    0.080088    0.460825    51.00000   -1.50000
H26C  2    0.340139    0.014326    0.465180    51.00000   -1.50000
AFIX   0
PART    2
C25B  1    0.338225    0.184362    0.489006   -51.00000    0.04221    0.04878 =
         0.06411   -0.00420   -0.00141   -0.00980
AFIX  23
H25C  2    0.354556    0.105785    0.509928   -51.00000   -1.20000
H25D  2    0.378701    0.245802    0.503378   -51.00000   -1.20000
AFIX   0
C26B  1    0.326431    0.162686    0.427408   -51.00000    0.09394    0.14904 =
         0.07486   -0.04682    0.05778   -0.04832
AFIX 137
H26D  2    0.287020    0.100846    0.412951   -51.00000   -1.50000
H26E  2    0.372713    0.132287    0.422223   -51.00000   -1.50000
H26F  2    0.311797    0.240658    0.406501   -51.00000   -1.50000
AFIX   0
PART    1
C27A  1    0.220285    0.127530    0.488650    21.00000    0.09271    0.04676 =
         0.07200   -0.01092    0.05207   -0.01950
AFIX  23
H27A  2    0.178991    0.161589    0.500716    21.00000   -1.20000
H27B  2    0.200844    0.120047    0.446716    21.00000   -1.20000
AFIX   0
C28A  1    0.230727    0.003359    0.509673    21.00000    0.06318    0.06206 =
         0.08938    0.02038    0.00788   -0.00616
AFIX 137
H28A  2    0.267540   -0.038392    0.495605    21.00000   -1.50000
H28B  2    0.183321   -0.041485    0.496502    21.00000   -1.50000
H28C  2    0.248492    0.004653    0.551352    21.00000   -1.50000
AFIX   0
PART    2
C27B  1    0.220285    0.127530    0.488650   -21.00000    0.09271    0.04676 =
         0.07200   -0.01092    0.05207   -0.01950
AFIX  23
H27C  2    0.243943    0.054156    0.511194   -21.00000   -1.20000
H27D  2    0.180808    0.155851    0.504238   -21.00000   -1.20000
AFIX   0
C28B  1    0.185045    0.086658    0.433182   -21.00000    0.06820    0.06968 =
         0.05505   -0.02902    0.02035   -0.02768
AFIX 137
H28D  2    0.163559    0.157862    0.408964   -21.00000   -1.50000
H28E  2    0.145402    0.028055    0.433145   -21.00000   -1.50000
H28F  2    0.221442    0.045372    0.418510   -21.00000   -1.50000
AFIX   0
PART    0
F21   4    0.125258    0.349121    0.533197    11.00000    0.03294    0.08552 =
         0.04060   -0.00018    0.00990   -0.02090
F22   4    0.222954    0.274639    0.595528    11.00000    0.05619    0.04309 =
         0.03831    0.00937    0.02045   -0.00843
F23   4    0.184063    0.456075    0.606792    11.00000    0.03568    0.05765 =
         0.03978   -0.00053    0.02173   -0.00407
F24   4    0.146498    0.560398    0.473915    11.00000    0.04214    0.07650 =
         0.05762    0.02174   -0.00233    0.01202
F25   4    0.215058    0.644417    0.551331    11.00000    0.05577    0.04226 =
         0.05252    0.01010    0.02473    0.01713
F26   4    0.259764    0.610284    0.483462    11.00000    0.06227    0.04716 =
         0.05301    0.02130    0.03304    0.00704
O4    3    0.510973    0.379948    0.627638    11.00000    0.02547    0.02786 =
         0.02844    0.00514    0.01606    0.00720
N4    6    0.643285    0.326099    0.727995    11.00000    0.02898    0.02381 =
         0.03149    0.00555    0.01340    0.00300
C31   1    0.575857    0.339359    0.622280    11.00000    0.03151    0.02229 =
         0.02851    0.00423    0.01692    0.00709
C32   1    0.621314    0.451445    0.612185    11.00000    0.03444    0.03067 =
         0.03890    0.00989    0.02405    0.00929
C33   1    0.559684    0.253580    0.569484    11.00000    0.04735    0.03616 =
         0.03553    0.00210    0.02203    0.00985
C34   1    0.623857    0.259770    0.673517    11.00000    0.03205    0.02185 =
         0.03450    0.00470    0.01551    0.00805
AFIX  23
H34A  2    0.595960    0.183573    0.676321    11.00000   -1.20000
H34B  2    0.670235    0.234209    0.666093    11.00000   -1.20000
AFIX   0
C35   1    0.722315    0.361709    0.749340    11.00000    0.02964    0.03951 =
         0.04457    0.00853    0.01217   -0.00127
AFIX  23
H35A  2    0.738933    0.387813    0.716921    11.00000   -1.20000
H35B  2    0.752269    0.288634    0.767262    11.00000   -1.20000
AFIX   0
C36   1    0.736201    0.465713    0.792039    11.00000    0.05940    0.07524 =
         0.05149   -0.01320    0.01904   -0.03106
AFIX 137
H36A  2    0.707969    0.539216    0.774132    11.00000   -1.50000
H36B  2    0.789450    0.485510    0.805387    11.00000   -1.50000
H36C  2    0.720220    0.440096    0.824384    11.00000   -1.50000
AFIX   0
C37   1    0.617786    0.260942    0.770930    11.00000    0.03443    0.03206 =
         0.03226    0.00335    0.01638    0.00206
AFIX  23
H37A  2    0.563847    0.244313    0.754089    11.00000   -1.20000
H37B  2    0.623871    0.317980    0.803429    11.00000   -1.20000
AFIX   0
C38   1    0.656072    0.139340    0.794028    11.00000    0.06079    0.03804 =
         0.04330    0.01524    0.02050    0.00560
AFIX 137
H38A  2    0.650520    0.081094    0.762560    11.00000   -1.50000
H38B  2    0.633305    0.103920    0.821083    11.00000   -1.50000
H38C  2    0.709086    0.154568    0.813340    11.00000   -1.50000
AFIX   0
F31   4    0.689458    0.423554    0.609894    11.00000    0.04018    0.05273 =
         0.06510    0.01376    0.03870    0.00819
F32   4    0.630786    0.536259    0.652965    11.00000    0.04799    0.02665 =
         0.04564    0.00325    0.02403   -0.00146
F33   4    0.586382    0.510849    0.562711    11.00000    0.05342    0.03904 =
         0.04128    0.01944    0.02410    0.00520
F34   4    0.620192    0.216244    0.556830    11.00000    0.06548    0.08093 =
         0.06027   -0.02573    0.03490    0.01895
F35   4    0.514940    0.306900    0.521599    11.00000    0.06045    0.05304 =
         0.02806    0.00488    0.01689   -0.00052
F36   4    0.523733    0.150983    0.576793    11.00000    0.08421    0.03073 =
         0.04070   -0.00264    0.01698   -0.00583
HKLF    4

REM  import_a.res in P2(1)/n
REM R1 =  0.0402 for    8014 Fo > 4sig(Fo)  and  0.0681 for all   10958 data
REM    668 parameters refined using      4 restraints

END

WGHT      0.0550      2.6583

REM Highest difference peak  0.844,  deepest hole -0.667,  1-sigma level  0.107
Q1    1   0.3800  0.3971  0.9556  11.00000  0.05    0.84
Q2    1   0.4310  0.5863  0.6631  11.00000  0.05    0.36
Q3    1   0.3174  0.1565  0.7934  11.00000  0.05    0.36
Q4    1   0.3998  0.3148  0.7921  11.00000  0.05    0.34
Q5    1   0.3768  0.2605  0.7670  11.00000  0.05    0.33
Q6    1   0.2804  0.3861  0.8227  11.00000  0.05    0.32
Q7    1   0.3743  0.5025  0.9657  11.00000  0.05    0.31
Q8    1   0.3931  0.0150  0.8343  11.00000  0.05    0.31
Q9    1   0.7176  0.0115  0.7973  11.00000  0.05    0.30
Q10   1   0.4520  0.6431  0.6848  11.00000  0.05    0.30
Q11   1   0.6432  0.0486  0.7460  11.00000  0.05    0.30
Q12   1   0.3039  0.4775  0.4690  11.00000  0.05    0.29
Q13   1   0.4549  0.0753  0.9318  11.00000  0.05    0.29
Q14   1   0.3222  0.5672  0.5179  11.00000  0.05    0.29
Q15   1   0.2950  0.1953  0.7173  11.00000  0.05    0.29
Q16   1   0.2969  0.0734  0.7236  11.00000  0.05    0.29
Q17   1   0.3562 -0.0238  0.7796  11.00000  0.05    0.29
Q18   1   0.3598  0.3559  0.4990  11.00000  0.05    0.29
Q19   1   0.4180  0.4178  0.5645  11.00000  0.05    0.29
Q20   1   0.1992  0.4220  0.7490  11.00000  0.05    0.29
;
# End of res file

#
# .hkl SHELXL file: SR681.hkl
#
#----------------------------------------------------------------------------#

#----------------------------------------------------------------------------#
#                ATOMIC TYPES, COORDINATES AND THERMAL PARAMETERS            #
#----------------------------------------------------------------------------#
 
loop_
    _atom_type_symbol
    _atom_type_description
    _atom_type_scat_dispersion_real
    _atom_type_scat_dispersion_imag
    _atom_type_scat_source
C   C    0.0033  0.0016   'International Tables Vol C Tables 4.2.6.8 and 6.1.1.4'
H   H    0.0000  0.0000   'International Tables Vol C Tables 4.2.6.8 and 6.1.1.4'
O   O    0.0106  0.0060   'International Tables Vol C Tables 4.2.6.8 and 6.1.1.4'
F   F    0.0171  0.0103   'International Tables Vol C Tables 4.2.6.8 and 6.1.1.4'
K   K    0.2009  0.2494   'International Tables Vol C Tables 4.2.6.8 and 6.1.1.4'
N   N    0.0061  0.0033   'International Tables Vol C Tables 4.2.6.8 and 6.1.1.4'

loop_
    _atom_site_label
    _atom_site_type_symbol
    _atom_site_fract_x
    _atom_site_fract_y
    _atom_site_fract_z
    _atom_site_U_iso_or_equiv
    _atom_site_adp_type
    _atom_site_occupancy
    _atom_site_symmetry_multiplicity
    _atom_site_calc_flag
    _atom_site_refinement_flags
    _atom_site_disorder_assembly
    _atom_site_disorder_group
K1   K   0.52069(3)   0.50232(4)   0.72395(2)   0.02453(11) Uani 1 1  d    .  . . 
K2   K   0.31255(3)   0.57554(5)   0.66815(2)   0.02801(12) Uani 1 1  d    .  . . 
K3   K   0.38695(3)   0.25838(4)   0.62506(2)   0.02766(12) Uani 1 1  d    .  . . 
K4   K   0.42948(3)   0.56679(4)   0.56376(2)   0.02642(11) Uani 1 1  d    .  . . 
O1   O   0.43726(9)   0.67433(13)  0.66341(7)   0.0257(3)   Uani 1 1  d    .  . . 
N1   N   0.51313(12)  0.75784(17)  0.77882(9)   0.0308(4)   Uani 1 1  d    .  . . 
C1   C   0.45922(14)  0.7933(2)    0.67296(10)  0.0291(5)   Uani 1 1  d    .  . . 
C2   C   0.39922(17)  0.8752(2)    0.63139(12)  0.0405(6)   Uani 1 1  d    .  . . 
C3   C   0.53322(16)  0.8117(2)    0.66016(12)  0.0373(6)   Uani 1 1  d    .  . . 
C4   C   0.46825(16)  0.8413(2)    0.73422(11)  0.0377(6)   Uani 1 1  d    .  . . 
H4A  H   0.4921       0.9242       0.7391       0.045       Uiso 1 1  calc R  U . 
H4B  H   0.4183       0.8508       0.7387       0.045       Uiso 1 1  calc R  U . 
C5   C   0.58147(17)  0.8188(3)    0.81538(13)  0.0491(7)   Uani 1 1  d    .  . . 
H5A  H   0.5673       0.8862       0.8372       0.059       Uiso 1 1  calc R  U . 
H5B  H   0.6081       0.8570       0.7909       0.059       Uiso 1 1  calc R  U . 
C6   C   0.63348(19)  0.7309(4)    0.85645(16)  0.0686(10)  Uani 1 1  d    .  . . 
H6A  H   0.6109       0.7040       0.8851       0.103       Uiso 1 1  calc R  U . 
H6B  H   0.6807       0.7731       0.8752       0.103       Uiso 1 1  calc R  U . 
H6C  H   0.6427       0.6584       0.8357       0.103       Uiso 1 1  calc R  U . 
C7   C   0.46869(16)  0.7005(2)    0.81104(11)  0.0390(6)   Uani 1 1  d    .  . . 
H7A  H   0.4984       0.6326       0.8343       0.047       Uiso 1 1  calc R  U . 
H7B  H   0.4243       0.6623       0.7836       0.047       Uiso 1 1  calc R  U . 
C8   C   0.4422(2)    0.7854(3)    0.85046(14)  0.0592(9)   Uani 1 1  d    .  . . 
H8A  H   0.4854       0.8164       0.8809       0.089       Uiso 1 1  calc R  U . 
H8B  H   0.4098       0.7386       0.8671       0.089       Uiso 1 1  calc R  U . 
H8C  H   0.4146       0.8556       0.8286       0.089       Uiso 1 1  calc R  U . 
F1   F   0.33392(10)  0.86144(17)  0.64046(7)   0.0542(5)   Uani 1 1  d    .  . . 
F2   F   0.41412(12)  0.99881(14)  0.63581(8)   0.0580(5)   Uani 1 1  d    .  . . 
F3   F   0.38788(10)  0.84589(15)  0.57677(7)   0.0503(4)   Uani 1 1  d    .  . . 
F4   F   0.55763(11)  0.92993(15)  0.66458(9)   0.0617(5)   Uani 1 1  d    .  . . 
F5   F   0.52902(9)   0.77435(16)  0.60718(7)   0.0487(4)   Uani 1 1  d    .  . . 
F6   F   0.58800(9)   0.74482(15)  0.69517(7)   0.0445(4)   Uani 1 1  d    .  . . 
O2   O   0.39476(9)   0.38031(14)  0.72517(6)   0.0257(3)   Uani 1 1  d    .  . . 
N2   N   0.43232(14)  0.2950(2)    0.87783(9)   0.0465(6)   Uani 1 1  d    D  . . 
C11  C   0.37756(12)  0.31995(19)  0.76791(9)   0.0222(4)   Uani 1 1  d    .  . . 
C12  C   0.30028(16)  0.3622(3)    0.76868(11)  0.0446(7)   Uani 1 1  d    .  . . 
C13  C   0.37426(17)  0.1790(2)    0.75591(11)  0.0403(6)   Uani 1 1  d    .  . . 
C14  C   0.43731(14)  0.3489(2)    0.82547(10)  0.0318(5)   Uani 1 1  d    .  . . 
H14A H   0.4861       0.3242       0.8219       0.038       Uiso 1 1  calc R  U . 
H14B H   0.4386       0.4402       0.8303       0.038       Uiso 1 1  calc R  U . 
C15A C   0.4928(3)    0.1945(6)    0.8965(2)    0.0468(15)  Uani 0.693(8)  1  d    .   . P 
H15A H   0.4945       0.1458       0.8630       0.056       Uiso 0.693(8)  1  calc R   U P 
H15B H   0.5420       0.2339       0.9136       0.056       Uiso 0.693(8)  1  calc R   U P 
C16A C   0.4759(3)    0.1089(6)    0.9397(3)    0.077(2)    Uani 0.693(8)  1  d    .   . P 
H16A H   0.4788       0.1559       0.9742       0.115       Uiso 0.693(8)  1  calc R   U P 
H16B H   0.5123       0.0412       0.9491       0.115       Uiso 0.693(8)  1  calc R   U P 
H16C H   0.4257       0.0744       0.9235       0.115       Uiso 0.693(8)  1  calc R   U P 
C15B C   0.4893(8)    0.2295(13)   0.9164(5)    0.0468(15)  Uani 0.307(8)  1  d    D   . P 
H15C H   0.4800       0.2259       0.9536       0.056       Uiso 0.307(8)  1  calc R   U P 
H15D H   0.5371       0.2732       0.9220       0.056       Uiso 0.307(8)  1  calc R   U P 
C16B C   0.4945(7)    0.1036(11)   0.8961(5)    0.061(4)    Uani 0.307(8)  1  d    D   . P 
H16D H   0.4464       0.0616       0.8890       0.092       Uiso 0.307(8)  1  calc R   U P 
H16E H   0.5330       0.0576       0.9250       0.092       Uiso 0.307(8)  1  calc R   U P 
H16F H   0.5074       0.1071       0.8608       0.092       Uiso 0.307(8)  1  calc R   U P 
C17A C   0.4459(7)    0.3868(13)   0.9226(4)    0.108(2)    Uani 0.556(7)  1  d    .   . P 
H17A H   0.4667       0.3450       0.9598       0.129       Uiso 0.556(7)  1  calc R   U P 
H17B H   0.4836       0.4466       0.9183       0.129       Uiso 0.556(7)  1  calc R   U P 
C18A C   0.3820(6)    0.4518(10)   0.9222(3)    0.108(2)    Uani 0.556(7)  1  d    .   . P 
H18A H   0.3444       0.4442       0.8848       0.161       Uiso 0.556(7)  1  calc R   U P 
H18B H   0.3944       0.5396       0.9305       0.161       Uiso 0.556(7)  1  calc R   U P 
H18C H   0.3623       0.4174       0.9513       0.161       Uiso 0.556(7)  1  calc R   U P 
C17B C   0.4027(9)    0.3823(18)   0.9111(6)    0.108(2)    Uani 0.444(7)  1  d    .   . P 
H17C H   0.3812       0.3354       0.9366       0.129       Uiso 0.444(7)  1  calc R   U P 
H17D H   0.3626       0.4328       0.8851       0.129       Uiso 0.444(7)  1  calc R   U P 
C18B C   0.4633(8)    0.4655(12)   0.9456(4)    0.108(2)    Uani 0.444(7)  1  d    .   . P 
H18D H   0.5067       0.4155       0.9660       0.161       Uiso 0.444(7)  1  calc R   U P 
H18E H   0.4457       0.5116       0.9730       0.161       Uiso 0.444(7)  1  calc R   U P 
H18F H   0.4773       0.5240       0.9203       0.161       Uiso 0.444(7)  1  calc R   U P 
F11  F   0.27385(10)  0.3046(2)    0.80623(8)   0.0688(6)   Uani 1 1  d    .  . . 
F12  F   0.30201(11)  0.4845(2)    0.78073(8)   0.0676(6)   Uani 1 1  d    .  . . 
F13  F   0.24831(9)   0.3514(2)    0.71818(8)   0.0744(7)   Uani 1 1  d    .  . . 
F14  F   0.35477(12)  0.10746(16)  0.79303(7)   0.0605(5)   Uani 1 1  d    .  . . 
F15  F   0.32611(12)  0.15133(16)  0.70418(7)   0.0610(5)   Uani 1 1  d    .  . . 
F16  F   0.44049(11)  0.13872(15)  0.75491(8)   0.0590(5)   Uani 1 1  d    .  . . 
O3   O   0.31411(8)   0.45038(15)  0.57361(6)   0.0270(3)   Uani 1 1  d    .  . . 
N3   N   0.27674(14)  0.2258(2)    0.50007(9)   0.0441(6)   Uani 1 1  d    D  . . 
C21  C   0.24591(13)  0.4332(2)    0.53590(9)   0.0302(5)   Uani 1 1  d    .  . . 
C22  C   0.19396(14)  0.3777(3)    0.56711(10)  0.0364(6)   Uani 1 1  d    .  . . 
C23  C   0.21574(15)  0.5613(3)    0.51118(11)  0.0400(6)   Uani 1 1  d    .  . . 
C24  C   0.24435(15)  0.3486(3)    0.48428(10)  0.0373(6)   Uani 1 1  d    .  . . 
H24A H   0.1920       0.3387       0.4599       0.045       Uiso 1 1  calc R  U . 
H24B H   0.2717       0.3909       0.4614       0.045       Uiso 1 1  calc R  U . 
C25A C   0.3330(4)    0.2089(6)    0.4660(3)    0.0381(16)  Uani 0.601(8)  1  d    .   . P 
H25A H   0.3057       0.2133       0.4247       0.046       Uiso 0.601(8)  1  calc R   U P 
H25B H   0.3695       0.2776       0.4754       0.046       Uiso 0.601(8)  1  calc R   U P 
C26A C   0.3753(3)    0.0826(4)    0.4794(2)    0.0488(16)  Uani 0.601(8)  1  d    .   . P 
H26A H   0.3982       0.0741       0.5206       0.073       Uiso 0.601(8)  1  calc R   U P 
H26B H   0.4140       0.0801       0.4608       0.073       Uiso 0.601(8)  1  calc R   U P 
H26C H   0.3401       0.0143       0.4652       0.073       Uiso 0.601(8)  1  calc R   U P 
C25B C   0.3382(6)    0.1844(12)   0.4890(5)    0.056(3)    Uani 0.399(8)  1  d    D   . P 
H25C H   0.3546       0.1058       0.5099       0.067       Uiso 0.399(8)  1  calc R   U P 
H25D H   0.3787       0.2458       0.5034       0.067       Uiso 0.399(8)  1  calc R   U P 
C26B C   0.3264(7)    0.1627(13)   0.4274(5)    0.099(5)    Uani 0.399(8)  1  d    D   . P 
H26D H   0.2870       0.1008       0.4130       0.148       Uiso 0.399(8)  1  calc R   U P 
H26E H   0.3727       0.1323       0.4222       0.148       Uiso 0.399(8)  1  calc R   U P 
H26F H   0.3118       0.2407       0.4065       0.148       Uiso 0.399(8)  1  calc R   U P 
C27A C   0.2203(2)    0.1275(3)    0.48865(16)  0.0644(10)  Uani 0.438(7)  1  d    .   . P 
H27A H   0.1790       0.1616       0.5007       0.077       Uiso 0.438(7)  1  calc R   U P 
H27B H   0.2008       0.1200       0.4467       0.077       Uiso 0.438(7)  1  calc R   U P 
C28A C   0.2307(5)    0.0034(8)    0.5097(4)    0.075(3)    Uani 0.438(7)  1  d    .   . P 
H28A H   0.2675      -0.0384       0.4956       0.113       Uiso 0.438(7)  1  calc R   U P 
H28B H   0.1833      -0.0415       0.4965       0.113       Uiso 0.438(7)  1  calc R   U P 
H28C H   0.2485       0.0047       0.5514       0.113       Uiso 0.438(7)  1  calc R   U P 
C27B C   0.2203(2)    0.1275(3)    0.48865(16)  0.0644(10)  Uani 0.562(7)  1  d    .   . P 
H27C H   0.2439       0.0542       0.5112       0.077       Uiso 0.562(7)  1  calc R   U P 
H27D H   0.1808       0.1559       0.5042       0.077       Uiso 0.562(7)  1  calc R   U P 
C28B C   0.1850(4)    0.0867(6)    0.4332(2)    0.064(2)    Uani 0.562(7)  1  d    .   . P 
H28D H   0.1636       0.1579       0.4090       0.096       Uiso 0.562(7)  1  calc R   U P 
H28E H   0.1454       0.0281       0.4331       0.096       Uiso 0.562(7)  1  calc R   U P 
H28F H   0.2214       0.0454       0.4185       0.096       Uiso 0.562(7)  1  calc R   U P 
F21  F   0.12526(9)   0.34912(18)  0.53320(7)   0.0534(5)   Uani 1 1  d    .  . . 
F22  F   0.22295(9)   0.27464(15)  0.59553(6)   0.0446(4)   Uani 1 1  d    .  . . 
F23  F   0.18406(8)   0.45608(16)  0.60679(6)   0.0421(4)   Uani 1 1  d    .  . . 
F24  F   0.14650(10)  0.56040(19)  0.47392(8)   0.0629(5)   Uani 1 1  d    .  . . 
F25  F   0.21506(10)  0.64442(15)  0.55133(7)   0.0484(4)   Uani 1 1  d    .  . . 
F26  F   0.25976(10)  0.61028(16)  0.48346(7)   0.0507(4)   Uani 1 1  d    .  . . 
O4   O   0.51097(8)   0.37995(14)  0.62764(6)   0.0255(3)   Uani 1 1  d    .  . . 
N4   N   0.64329(11)  0.32610(18)  0.72799(8)   0.0272(4)   Uani 1 1  d    .  . . 
C31  C   0.57586(13)  0.3394(2)    0.62228(9)   0.0257(5)   Uani 1 1  d    .  . . 
C32  C   0.62131(14)  0.4514(2)    0.61218(10)  0.0318(5)   Uani 1 1  d    .  . . 
C33  C   0.55968(16)  0.2536(2)    0.56948(11)  0.0376(6)   Uani 1 1  d    .  . . 
C34  C   0.62386(13)  0.2598(2)    0.67352(10)  0.0283(5)   Uani 1 1  d    .  . . 
H34A H   0.5960       0.1836       0.6763       0.034       Uiso 1 1  calc R  U . 
H34B H   0.6702       0.2342       0.6661       0.034       Uiso 1 1  calc R  U . 
C35  C   0.72231(14)  0.3617(2)    0.74934(11)  0.0378(6)   Uani 1 1  d    .  . . 
H35A H   0.7389       0.3878       0.7169       0.045       Uiso 1 1  calc R  U . 
H35B H   0.7523       0.2886       0.7673       0.045       Uiso 1 1  calc R  U . 
C36  C   0.7362(2)    0.4657(4)    0.79204(14)  0.0617(9)   Uani 1 1  d    .  . . 
H36A H   0.7080       0.5392       0.7741       0.092       Uiso 1 1  calc R  U . 
H36B H   0.7895       0.4855       0.8054       0.092       Uiso 1 1  calc R  U . 
H36C H   0.7202       0.4401       0.8244       0.092       Uiso 1 1  calc R  U . 
C37  C   0.61779(14)  0.2609(2)    0.77093(10)  0.0315(5)   Uani 1 1  d    .  . . 
H37A H   0.5638       0.2443       0.7541       0.038       Uiso 1 1  calc R  U . 
H37B H   0.6239       0.3180       0.8034       0.038       Uiso 1 1  calc R  U . 
C38  C   0.65607(18)  0.1393(3)    0.79403(12)  0.0464(7)   Uani 1 1  d    .  . . 
H38A H   0.6505       0.0811       0.7626       0.070       Uiso 1 1  calc R  U . 
H38B H   0.6333       0.1039       0.8211       0.070       Uiso 1 1  calc R  U . 
H38C H   0.7091       0.1546       0.8133       0.070       Uiso 1 1  calc R  U . 
F31  F   0.68946(9)   0.42355(15)  0.60989(7)   0.0475(4)   Uani 1 1  d    .  . . 
F32  F   0.63079(9)   0.53626(13)  0.65296(6)   0.0379(3)   Uani 1 1  d    .  . . 
F33  F   0.58638(9)   0.51085(14)  0.56271(6)   0.0424(4)   Uani 1 1  d    .  . . 
F34  F   0.62019(11)  0.21624(19)  0.55683(8)   0.0654(5)   Uani 1 1  d    .  . . 
F35  F   0.51494(9)   0.30690(16)  0.52160(6)   0.0465(4)   Uani 1 1  d    .  . . 
F36  F   0.52373(11)  0.15098(14)  0.57679(7)   0.0525(4)   Uani 1 1  d    .  . . 

loop_
    _atom_site_aniso_label
    _atom_site_aniso_U_11
    _atom_site_aniso_U_22
    _atom_site_aniso_U_33
    _atom_site_aniso_U_23
    _atom_site_aniso_U_13
    _atom_site_aniso_U_12
K1   0.0282(2)    0.0198(2)    0.0288(2)    0.00138(18)  0.01365(19)  0.00354(19) 
K2   0.0302(3)    0.0256(2)    0.0324(3)    0.00187(19)  0.0158(2)    0.0026(2)   
K3   0.0350(3)    0.0190(2)    0.0305(2)    0.00077(18)  0.0124(2)    0.00044(19) 
K4   0.0311(3)    0.0248(2)    0.0279(2)    0.00510(19)  0.0157(2)    0.0019(2)   
O1   0.0321(8)    0.0146(7)    0.0347(8)    0.0034(6)    0.0165(7)    0.0007(6)   
N1   0.0402(12)   0.0193(9)    0.0364(11)  -0.0046(8)    0.0170(9)   -0.0042(8)   
C1   0.0427(14)   0.0151(10)   0.0366(12)   0.0027(9)    0.0225(11)   0.0010(9)   
C2   0.0598(18)   0.0235(12)   0.0476(15)   0.0089(11)   0.0305(14)   0.0111(12)  
C3   0.0483(16)   0.0225(12)   0.0479(15)  -0.0051(11)   0.0249(13)  -0.0085(11)  
C4   0.0583(17)   0.0174(11)   0.0437(14)  -0.0015(10)   0.0251(13)   0.0054(11)  
C5   0.0585(19)   0.0402(16)   0.0529(17)  -0.0194(13)   0.0236(15)  -0.0186(14)  
C6   0.050(2)     0.078(3)     0.067(2)    -0.0251(19)   0.0024(17)  -0.0025(18)  
C7   0.0477(16)   0.0311(13)   0.0436(14)   0.0020(11)   0.0221(13)  -0.0027(12)  
C8   0.070(2)     0.065(2)     0.0559(19)   0.0009(16)   0.0394(17)   0.0123(18)  
F1   0.0519(10)   0.0573(11)   0.0613(10)   0.0229(8)    0.0293(9)    0.0243(8)   
F2   0.0979(15)   0.0189(8)    0.0673(11)   0.0133(7)    0.0406(11)   0.0167(8)   
F3   0.0715(12)   0.0424(9)    0.0404(8)    0.0117(7)    0.0224(8)    0.0188(8)   
F4   0.0726(12)   0.0292(9)    0.0959(14)  -0.0072(9)    0.0445(11)  -0.0234(8)   
F5   0.0566(10)   0.0531(10)   0.0500(9)   -0.0066(8)    0.0361(8)   -0.0149(8)   
F6   0.0378(8)    0.0442(9)    0.0570(10)  -0.0081(7)    0.0226(8)   -0.0003(7)   
O2   0.0341(9)    0.0208(8)    0.0290(8)    0.0041(6)    0.0195(7)    0.0002(6)   
N2   0.0603(16)   0.0513(15)   0.0288(11)   0.0112(10)   0.0151(11)   0.0054(12)  
C11  0.0264(11)   0.0179(10)   0.0281(11)   0.0041(8)    0.0170(9)    0.0010(8)   
C12  0.0382(15)   0.065(2)     0.0381(14)   0.0152(13)   0.0224(12)   0.0113(14)  
C13  0.0586(18)   0.0308(14)   0.0334(13)   0.0001(10)   0.0172(13)  -0.0166(13)  
C14  0.0364(13)   0.0286(12)   0.0332(12)   0.0004(10)   0.0152(11)  -0.0001(10)  
C15A 0.0386(19)   0.054(4)     0.039(3)     0.017(3)     0.000(2)    -0.007(2)    
C16A 0.041(3)     0.089(4)     0.083(4)     0.056(3)    -0.006(3)    -0.015(3)    
C15B 0.0386(19)   0.054(4)     0.039(3)     0.017(3)     0.000(2)    -0.007(2)    
C16B 0.061(7)     0.044(7)     0.073(9)     0.013(6)     0.012(6)     0.004(5)    
C17A 0.147(6)     0.122(5)     0.057(3)    -0.030(3)     0.038(4)    -0.002(6)    
C18A 0.147(6)     0.122(5)     0.057(3)    -0.030(3)     0.038(4)    -0.002(6)    
C17B 0.147(6)     0.122(5)     0.057(3)    -0.030(3)     0.038(4)    -0.002(6)    
C18B 0.147(6)     0.122(5)     0.057(3)    -0.030(3)     0.038(4)    -0.002(6)    
F11  0.0452(10)   0.1154(17)   0.0604(11)   0.0288(11)   0.0377(9)    0.0081(11)  
F12  0.0711(13)   0.0743(14)   0.0694(12)   0.0159(10)   0.0392(10)   0.0451(11)  
F13  0.0316(9)    0.142(2)     0.0480(10)   0.0185(12)   0.0095(8)    0.0105(11)  
F14  0.0947(15)   0.0412(10)   0.0451(9)    0.0089(7)    0.0214(9)   -0.0300(9)   
F15  0.0910(14)   0.0519(10)   0.0377(9)   -0.0062(8)    0.0167(9)   -0.0393(10)  
F16  0.0791(13)   0.0283(9)    0.0761(12)  -0.0053(8)    0.0338(11)   0.0131(8)   
O3   0.0253(8)    0.0286(8)    0.0277(8)    0.0027(6)    0.0093(7)    0.0000(6)   
N3   0.0570(15)   0.0367(13)   0.0346(12)  -0.0041(10)   0.0086(11)  -0.0036(11)  
C21  0.0281(12)   0.0378(13)   0.0256(11)   0.0060(10)   0.0096(9)   -0.0002(10)  
C22  0.0314(13)   0.0492(16)   0.0290(12)   0.0007(11)   0.0098(10)  -0.0057(12)  
C23  0.0332(13)   0.0507(17)   0.0370(13)   0.0118(12)   0.0124(11)   0.0070(12)  
C24  0.0414(15)   0.0441(15)   0.0262(12)   0.0037(10)   0.0104(11)  -0.0046(12)  
C25A 0.048(3)     0.029(3)     0.038(4)     0.011(3)     0.016(3)     0.001(2)    
C26A 0.066(3)     0.031(3)     0.062(3)    -0.002(2)     0.037(3)    -0.002(2)    
C25B 0.042(5)     0.049(7)     0.064(8)    -0.004(5)    -0.001(6)    -0.010(5)    
C26B 0.094(8)     0.149(12)    0.075(7)    -0.047(8)     0.058(7)    -0.048(8)    
C27A 0.093(3)     0.0468(19)   0.072(2)    -0.0109(16)   0.052(2)    -0.0195(18)  
C28A 0.063(5)     0.062(6)     0.089(7)     0.020(5)     0.008(5)    -0.006(4)    
C27B 0.093(3)     0.0468(19)   0.072(2)    -0.0109(16)   0.052(2)    -0.0195(18)  
C28B 0.068(4)     0.070(4)     0.055(4)    -0.029(3)     0.020(3)    -0.028(3)    
F21  0.0329(8)    0.0855(13)   0.0406(8)   -0.0002(8)    0.0099(7)   -0.0209(9)   
F22  0.0562(10)   0.0431(9)    0.0383(8)    0.0094(7)    0.0205(7)   -0.0084(8)   
F23  0.0357(8)    0.0576(10)   0.0398(8)   -0.0005(7)    0.0217(7)   -0.0041(7)   
F24  0.0421(10)   0.0765(13)   0.0576(11)   0.0217(10)  -0.0023(8)    0.0120(9)   
F25  0.0558(10)   0.0423(9)    0.0525(9)    0.0101(7)    0.0247(8)    0.0171(8)   
F26  0.0623(11)   0.0472(9)    0.0530(9)    0.0213(8)    0.0330(9)    0.0070(8)   
O4   0.0255(8)    0.0279(8)    0.0284(8)    0.0051(6)    0.0161(7)    0.0072(6)   
N4   0.0290(10)   0.0238(10)   0.0315(10)   0.0055(8)    0.0134(8)    0.0030(8)   
C31  0.0315(12)   0.0223(11)   0.0285(11)   0.0042(9)    0.0169(10)   0.0071(9)   
C32  0.0344(13)   0.0307(12)   0.0389(13)   0.0099(10)   0.0240(11)   0.0093(10)  
C33  0.0473(15)   0.0362(14)   0.0355(13)   0.0021(11)   0.0220(12)   0.0099(12)  
C34  0.0320(12)   0.0219(11)   0.0345(12)   0.0047(9)    0.0155(10)   0.0081(9)   
C35  0.0296(13)   0.0395(15)   0.0446(14)   0.0085(11)   0.0122(11)  -0.0013(11)  
C36  0.059(2)     0.075(2)     0.0515(18)  -0.0132(17)   0.0190(16)  -0.0311(18)  
C37  0.0344(13)   0.0321(13)   0.0323(12)   0.0033(10)   0.0164(10)   0.0021(10)  
C38  0.0608(19)   0.0380(15)   0.0433(15)   0.0152(12)   0.0205(14)   0.0056(13)  
F31  0.0402(9)    0.0527(10)   0.0651(10)   0.0138(8)    0.0387(8)    0.0082(7)   
F32  0.0480(9)    0.0266(7)    0.0456(8)    0.0033(6)    0.0240(7)   -0.0015(6)   
F33  0.0534(9)    0.0390(8)    0.0413(8)    0.0194(7)    0.0241(7)    0.0052(7)   
F34  0.0655(12)   0.0809(14)   0.0603(11)  -0.0257(10)   0.0349(10)   0.0190(10)  
F35  0.0604(10)   0.0530(10)   0.0281(7)    0.0049(7)    0.0169(7)   -0.0005(8)   
F36  0.0842(13)   0.0307(8)    0.0407(9)   -0.0026(7)    0.0170(9)   -0.0058(8)   


#----------------------------------------------------------------------------#
#                               MOLECULAR GEOMETRY                           #
#----------------------------------------------------------------------------#
 
_geom_special_details
;
 All esds (except the esd in the dihedral angle between two l.s. planes)
 are estimated using the full covariance matrix.  The cell esds are taken
 into account individually in the estimation of esds in distances, angles
 and torsion angles; correlations between esds in cell parameters are only
 used when they are defined by crystal symmetry.  An approximate (isotropic)
 treatment of cell esds is used for estimating esds involving l.s. planes.
;
loop_
    _geom_bond_atom_site_label_1
    _geom_bond_atom_site_label_2
    _geom_bond_distance
    _geom_bond_site_symmetry_2
    _geom_bond_publ_flag
K1   O1   2.5862(16)  .           ?           
K1   O4   2.6800(16)  .           ?           
K1   O2   2.7289(16)  .           ?           
K1   N4   2.9742(19)  .           ?           
K1   F6   3.0859(17)  .           ?           
K1   N1   3.0928(19)  .           ?           
K1   F32  3.1388(15)  .           ?           
K1   C37  3.186(2)    .           ?           
K1   C7   3.392(3)    .           ?           
K1   C1   3.442(2)    .           ?           
K1   C31  3.486(2)    .           ?           
K1   K2   3.8235(7)   .           ?           
K2   O1   2.6237(16)  .           ?           
K2   O3   2.7092(16)  .           ?           
K2   O2   2.7311(16)  .           ?           
K2   F23  2.7488(16)  .           ?           
K2   F25  2.9952(17)  .           ?           
K2   F12  3.0195(19)  .           ?           
K2   F13  3.128(2)    .           ?           
K2   F11  3.132(2)    2_556       ?           
K2   F1   3.2086(18)  .           ?           
K2   C12  3.448(3)    .           ?           
K2   C21  3.474(2)    .           ?           
K2   C22  3.509(3)    .           ?           
K3   O3   2.5884(16)  .           ?           
K3   O4   2.6698(16)  .           ?           
K3   O2   2.7675(16)  .           ?           
K3   F15  2.8113(17)  .           ?           
K3   F2   2.8409(15)  1_545       ?           
K3   F22  2.9606(18)  .           ?           
K3   N3   3.162(2)    .           ?           
K3   C25B 3.299(12)   .           ?           
K3   F16  3.314(2)    .           ?           
K3   F36  3.376(2)    .           ?           
K3   C13  3.431(3)    .           ?           
K3   C21  3.442(2)    .           ?           
K4   O3   2.5936(16)  .           ?           
K4   O1   2.6872(16)  .           ?           
K4   O4   2.7204(16)  .           ?           
K4   F5   2.9039(17)  .           ?           
K4   F35  2.9690(15)  3_666       ?           
K4   F33  3.0363(16)  .           ?           
K4   F3   3.1502(17)  .           ?           
K4   F33  3.1629(16)  3_666       ?           
K4   F26  3.2365(19)  .           ?           
O1   C1   1.345(3)    .           ?           
N1   C7   1.464(3)    .           ?           
N1   C4   1.470(3)    .           ?           
N1   C5   1.479(3)    .           ?           
C1   C3   1.542(3)    .           ?           
C1   C2   1.548(4)    .           ?           
C1   C4   1.561(3)    .           ?           
C2   F1   1.331(3)    .           ?           
C2   F3   1.339(3)    .           ?           
C2   F2   1.358(3)    .           ?           
C3   F6   1.334(3)    .           ?           
C3   F4   1.348(3)    .           ?           
C3   F5   1.350(3)    .           ?           
C4   H4A  0.9900      .           ?           
C4   H4B  0.9900      .           ?           
C5   C6   1.507(5)    .           ?           
C5   H5A  0.9900      .           ?           
C5   H5B  0.9900      .           ?           
C6   H6A  0.9800      .           ?           
C6   H6B  0.9800      .           ?           
C6   H6C  0.9800      .           ?           
C7   C8   1.531(4)    .           ?           
C7   H7A  0.9900      .           ?           
C7   H7B  0.9900      .           ?           
C8   H8A  0.9800      .           ?           
C8   H8B  0.9800      .           ?           
C8   H8C  0.9800      .           ?           
F2   K3   2.8408(15)  1_565       ?           
O2   C11  1.365(2)    .           ?           
N2   C15B 1.388(12)   .           ?           
N2   C17A 1.447(12)   .           ?           
N2   C14  1.450(3)    .           ?           
N2   C17B 1.472(16)   .           ?           
N2   C15A 1.537(6)    .           ?           
C11  C12  1.537(3)    .           ?           
C11  C13  1.545(3)    .           ?           
C11  C14  1.548(3)    .           ?           
C12  F13  1.331(3)    .           ?           
C12  F11  1.338(3)    .           ?           
C12  F12  1.349(4)    .           ?           
C13  F16  1.333(3)    .           ?           
C13  F14  1.337(3)    .           ?           
C13  F15  1.352(3)    .           ?           
C14  H14A 0.9900      .           ?           
C14  H14B 0.9900      .           ?           
C15A C16A 1.519(8)    .           ?           
C15A H15A 0.9900      .           ?           
C15A H15B 0.9900      .           ?           
C16A H16A 0.9800      .           ?           
C16A H16B 0.9800      .           ?           
C16A H16C 0.9800      .           ?           
C15B C16B 1.461(14)   .           ?           
C15B H15C 0.9900      .           ?           
C15B H15D 0.9900      .           ?           
C16B H16D 0.9800      .           ?           
C16B H16E 0.9800      .           ?           
C16B H16F 0.9800      .           ?           
C17A C18A 1.394(18)   .           ?           
C17A H17A 0.9900      .           ?           
C17A H17B 0.9900      .           ?           
C18A H18A 0.9800      .           ?           
C18A H18B 0.9800      .           ?           
C18A H18C 0.9800      .           ?           
C17B C18B 1.49(2)     .           ?           
C17B H17C 0.9900      .           ?           
C17B H17D 0.9900      .           ?           
C18B H18D 0.9800      .           ?           
C18B H18E 0.9800      .           ?           
C18B H18F 0.9800      .           ?           
F11  K2   3.132(2)    2_546       ?           
O3   C21  1.347(3)    .           ?           
N3   C25B 1.352(11)   .           ?           
N3   C24  1.459(4)    .           ?           
N3   C27B 1.467(4)    .           ?           
N3   C27A 1.467(4)    .           ?           
N3   C25A 1.562(7)    .           ?           
C21  C23  1.544(4)    .           ?           
C21  C22  1.548(3)    .           ?           
C21  C24  1.562(3)    .           ?           
C22  F22  1.337(3)    .           ?           
C22  F21  1.343(3)    .           ?           
C22  F23  1.352(3)    .           ?           
C23  F25  1.341(3)    .           ?           
C23  F26  1.342(3)    .           ?           
C23  F24  1.345(3)    .           ?           
C24  H24A 0.9900      .           ?           
C24  H24B 0.9900      .           ?           
C25A C26A 1.560(8)    .           ?           
C25A H25A 0.9900      .           ?           
C25A H25B 0.9900      .           ?           
C26A H26A 0.9800      .           ?           
C26A H26B 0.9800      .           ?           
C26A H26C 0.9800      .           ?           
C25B C26B 1.489(12)   .           ?           
C25B H25C 0.9900      .           ?           
C25B H25D 0.9900      .           ?           
C26B H26D 0.9800      .           ?           
C26B H26E 0.9800      .           ?           
C26B H26F 0.9800      .           ?           
C27A C28A 1.427(9)    .           ?           
C27A H27A 0.9900      .           ?           
C27A H27B 0.9900      .           ?           
C28A H28A 0.9800      .           ?           
C28A H28B 0.9800      .           ?           
C28A H28C 0.9800      .           ?           
C27B C28B 1.396(6)    .           ?           
C27B H27C 0.9900      .           ?           
C27B H27D 0.9900      .           ?           
C28B H28D 0.9800      .           ?           
C28B H28E 0.9800      .           ?           
C28B H28F 0.9800      .           ?           
O4   C31  1.348(3)    .           ?           
N4   C34  1.468(3)    .           ?           
N4   C35  1.472(3)    .           ?           
N4   C37  1.475(3)    .           ?           
C31  C32  1.547(3)    .           ?           
C31  C33  1.551(3)    .           ?           
C31  C34  1.564(3)    .           ?           
C32  F32  1.332(3)    .           ?           
C32  F31  1.342(3)    .           ?           
C32  F33  1.356(3)    .           ?           
C33  F34  1.340(3)    .           ?           
C33  F36  1.339(3)    .           ?           
C33  F35  1.350(3)    .           ?           
C34  H34A 0.9900      .           ?           
C34  H34B 0.9900      .           ?           
C35  C36  1.506(4)    .           ?           
C35  H35A 0.9900      .           ?           
C35  H35B 0.9900      .           ?           
C36  H36A 0.9800      .           ?           
C36  H36B 0.9800      .           ?           
C36  H36C 0.9800      .           ?           
C37  C38  1.519(3)    .           ?           
C37  H37A 0.9900      .           ?           
C37  H37B 0.9900      .           ?           
C38  H38A 0.9800      .           ?           
C38  H38B 0.9800      .           ?           
C38  H38C 0.9800      .           ?           
F33  K4   3.1629(16)  3_666       ?           
F35  K4   2.9690(15)  3_666       ?           

loop_
    _geom_angle_atom_site_label_1
    _geom_angle_atom_site_label_2
    _geom_angle_atom_site_label_3
    _geom_angle
    _geom_angle_site_symmetry_1
    _geom_angle_site_symmetry_3
    _geom_angle_publ_flag
O1   K1   O4    88.72(5)    .       .       ?       
O1   K1   O2    88.59(5)    .       .       ?       
O4   K1   O2    87.48(5)    .       .       ?       
O1   K1   N4   143.57(5)    .       .       ?       
O4   K1   N4    63.33(5)    .       .       ?       
O2   K1   N4   111.47(5)    .       .       ?       
O1   K1   F6    58.70(5)    .       .       ?       
O4   K1   F6    97.43(5)    .       .       ?       
O2   K1   F6   146.62(5)    .       .       ?       
N4   K1   F6   100.05(5)    .       .       ?       
O1   K1   N1    60.85(5)    .       .       ?       
O4   K1   N1   145.98(5)    .       .       ?       
O2   K1   N1   105.27(5)    .       .       ?       
N4   K1   N1   134.13(6)    .       .       ?       
F6   K1   N1    55.04(5)    .       .       ?       
O1   K1   F32   89.05(4)    .       .       ?       
O4   K1   F32   55.37(4)    .       .       ?       
O2   K1   F32  142.82(4)    .       .       ?       
N4   K1   F32   56.37(4)    .       .       ?       
F6   K1   F32   51.54(4)    .       .       ?       
N1   K1   F32  105.80(5)    .       .       ?       
O1   K1   C37  166.83(6)    .       .       ?       
O4   K1   C37   78.12(5)    .       .       ?       
O2   K1   C37   90.46(6)    .       .       ?       
N4   K1   C37   27.44(5)    .       .       ?       
F6   K1   C37  122.89(6)    .       .       ?       
N1   K1   C37  131.84(6)    .       .       ?       
F32  K1   C37   83.79(5)    .       .       ?       
O1   K1   C7    70.82(6)    .       .       ?       
O4   K1   C7   157.30(6)    .       .       ?       
O2   K1   C7    82.44(6)    .       .       ?       
N4   K1   C7   139.36(6)    .       .       ?       
F6   K1   C7    80.59(5)    .       .       ?       
N1   K1   C7    25.57(6)    .       .       ?       
F32  K1   C7   131.14(5)    .       .       ?       
C37  K1   C7   122.06(6)    .       .       ?       
O1   K1   C1    20.02(5)    .       .       ?       
O4   K1   C1   101.57(5)    .       .       ?       
O2   K1   C1   104.30(5)    .       .       ?       
N4   K1   C1   139.79(5)    .       .       ?       
F6   K1   C1    42.33(5)    .       .       ?       
N1   K1   C1    45.07(5)    .       .       ?       
F32  K1   C1    84.01(5)    .       .       ?       
C37  K1   C1   165.23(6)    .       .       ?       
C7   K1   C1    61.83(6)    .       .       ?       
O1   K1   C31  102.05(5)    .       .       ?       
O4   K1   C31   20.36(5)    .       .       ?       
O2   K1   C31  103.01(5)    .       .       ?       
N4   K1   C31   45.26(5)    .       .       ?       
F6   K1   C31   91.22(5)    .       .       ?       
N1   K1   C31  146.19(5)    .       .       ?       
F32  K1   C31   41.69(5)    .       .       ?       
C37  K1   C31   65.40(6)    .       .       ?       
C7   K1   C31  171.13(6)    .       .       ?       
C1   K1   C31  109.69(5)    .       .       ?       
O1   K1   K2    43.17(3)    .       .       ?       
O4   K1   K2    90.25(4)    .       .       ?       
O2   K1   K2    45.57(3)    .       .       ?       
N4   K1   K2   147.93(4)    .       .       ?       
F6   K1   K2   101.21(3)    .       .       ?       
N1   K1   K2    77.93(4)    .       .       ?       
F32  K1   K2   124.21(3)    .       .       ?       
C37  K1   K2   135.30(5)    .       .       ?       
C7   K1   K2    68.22(5)    .       .       ?       
C1   K1   K2    59.24(4)    .       .       ?       
C31  K1   K2   110.50(4)    .       .       ?       
O1   K2   O3    84.83(5)    .       .       ?       
O1   K2   O2    87.79(5)    .       .       ?       
O3   K2   O2    84.52(5)    .       .       ?       
O1   K2   F23  144.76(5)    .       .       ?       
O3   K2   F23   62.40(5)    .       .       ?       
O2   K2   F23  100.74(5)    .       .       ?       
O1   K2   F25   98.42(5)    .       .       ?       
O3   K2   F25   57.27(4)    .       .       ?       
O2   K2   F25  140.20(5)    .       .       ?       
F23  K2   F25   54.01(5)    .       .       ?       
O1   K2   F12  119.56(6)    .       .       ?       
O3   K2   F12  131.11(6)    .       .       ?       
O2   K2   F12   57.62(4)    .       .       ?       
F23  K2   F12   93.17(6)    .       .       ?       
F25  K2   F12  140.61(5)    .       .       ?       
O1   K2   F13  142.85(5)    .       .       ?       
O3   K2   F13   93.93(5)    .       .       ?       
O2   K2   F13   55.23(5)    .       .       ?       
F23  K2   F13   58.09(5)    .       .       ?       
F25  K2   F13  112.06(5)    .       .       ?       
F12  K2   F13   40.33(6)    .       .       ?       
O1   K2   F11  102.88(5)    .       2_556   ?       
O3   K2   F11  135.62(5)    .       2_556   ?       
O2   K2   F11  138.65(5)    .       2_556   ?       
F23  K2   F11   93.08(5)    .       2_556   ?       
F25  K2   F11   78.35(5)    .       2_556   ?       
F12  K2   F11   83.07(5)    .       2_556   ?       
F13  K2   F11  103.65(6)    .       2_556   ?       
O1   K2   F1    54.96(4)    .       .       ?       
O3   K2   F1   104.90(5)    .       .       ?       
O2   K2   F1   139.50(5)    .       .       ?       
F23  K2   F1   118.70(5)    .       .       ?       
F25  K2   F1    68.69(5)    .       .       ?       
F12  K2   F1   123.92(5)    .       .       ?       
F13  K2   F1   156.38(5)    .       .       ?       
F11  K2   F1    52.82(5)    2_556   .       ?       
O1   K2   C12  124.57(6)    .       .       ?       
O3   K2   C12  108.25(6)    .       .       ?       
O2   K2   C12   43.10(5)    .       .       ?       
F23  K2   C12   80.73(6)    .       .       ?       
F25  K2   C12  134.56(6)    .       .       ?       
F12  K2   C12   22.87(6)    .       .       ?       
F13  K2   C12   22.69(6)    .       .       ?       
F11  K2   C12  102.80(6)    2_556   .       ?       
F1   K2   C12  146.67(6)    .       .       ?       
O1   K2   C21  101.69(5)    .       .       ?       
O3   K2   C21   20.82(5)    .       .       ?       
O2   K2   C21   97.28(5)    .       .       ?       
F23  K2   C21   43.60(5)    .       .       ?       
F25  K2   C21   42.93(5)    .       .       ?       
F12  K2   C21  128.11(6)    .       .       ?       
F13  K2   C21   87.78(6)    .       .       ?       
F11  K2   C21  118.70(6)    2_556   .       ?       
F1   K2   C21  104.78(5)    .       .       ?       
C12  K2   C21  107.42(7)    .       .       ?       
O1   K2   C22  126.67(5)    .       .       ?       
O3   K2   C22   42.22(5)    .       .       ?       
O2   K2   C22   91.94(6)    .       .       ?       
F23  K2   C22   20.74(5)    .       .       ?       
F25  K2   C22   53.11(6)    .       .       ?       
F12  K2   C22  104.38(6)    .       .       ?       
F13  K2   C22   64.69(6)    .       .       ?       
F11  K2   C22  111.43(6)    2_556   .       ?       
F1   K2   C22  121.73(6)    .       .       ?       
C12  K2   C22   86.39(7)    .       .       ?       
C21  K2   C22   25.61(5)    .       .       ?       
O3   K3   O4    87.01(5)    .       .       ?       
O3   K3   O2    86.11(5)    .       .       ?       
O4   K3   O2    86.90(5)    .       .       ?       
O3   K3   F15  113.56(6)    .       .       ?       
O4   K3   F15  137.14(5)    .       .       ?       
O2   K3   F15   59.30(5)    .       .       ?       
O3   K3   F2   152.32(6)    .       1_545   ?       
O4   K3   F2   110.42(6)    .       1_545   ?       
O2   K3   F2   115.22(5)    .       1_545   ?       
F15  K3   F2    68.43(6)    .       1_545   ?       
O3   K3   F22   58.42(5)    .       .       ?       
O4   K3   F22  145.24(5)    .       .       ?       
O2   K3   F22   87.18(5)    .       .       ?       
F15  K3   F22   64.56(5)    .       .       ?       
F2   K3   F22  103.07(5)    1_545   .       ?       
O3   K3   N3    61.39(6)    .       .       ?       
O4   K3   N3   112.50(6)    .       .       ?       
O2   K3   N3   139.70(6)    .       .       ?       
F15  K3   N3   110.36(6)    .       .       ?       
F2   K3   N3    91.54(6)    1_545   .       ?       
F22  K3   N3    56.40(6)    .       .       ?       
O3   K3   C25B  75.8(2)     .       .       ?       
O4   K3   C25B  96.0(2)     .       .       ?       
O2   K3   C25B 161.5(2)     .       .       ?       
F15  K3   C25B 124.6(2)     .       .       ?       
F2   K3   C25B  80.9(2)     1_545   .       ?       
F22  K3   C25B  80.0(2)     .       .       ?       
N3   K3   C25B  24.03(19)   .       .       ?       
O3   K3   F16  137.90(5)    .       .       ?       
O4   K3   F16   99.71(5)    .       .       ?       
O2   K3   F16   53.25(4)    .       .       ?       
F15  K3   F16   39.82(5)    .       .       ?       
F2   K3   F16   62.28(5)    1_545   .       ?       
F22  K3   F16  103.92(5)    .       .       ?       
N3   K3   F16  144.42(6)    .       .       ?       
C25B K3   F16  143.0(2)     .       .       ?       
O3   K3   F36  116.65(5)    .       .       ?       
O4   K3   F36   53.96(4)    .       .       ?       
O2   K3   F36  130.38(5)    .       .       ?       
F15  K3   F36  129.23(6)    .       .       ?       
F2   K3   F36   63.87(5)    1_545   .       ?       
F22  K3   F36  142.43(4)    .       .       ?       
N3   K3   F36   87.65(6)    .       .       ?       
C25B K3   F36   63.6(2)     .       .       ?       
F16  K3   F36  100.07(4)    .       .       ?       
O3   K3   C13  118.68(6)    .       .       ?       
O4   K3   C13  114.88(6)    .       .       ?       
O2   K3   C13   43.34(5)    .       .       ?       
F15  K3   C13   22.31(6)    .       .       ?       
F2   K3   C13   74.35(6)    1_545   .       ?       
F22  K3   C13   82.53(6)    .       .       ?       
N3   K3   C13  132.57(7)    .       .       ?       
C25B K3   C13  145.5(2)     .       .       ?       
F16  K3   C13   22.72(6)    .       .       ?       
F36  K3   C13  122.47(6)    .       .       ?       
O3   K3   C21   20.11(5)    .       .       ?       
O4   K3   C21  104.20(5)    .       .       ?       
O2   K3   C21   97.33(5)    .       .       ?       
F15  K3   C21  105.49(6)    .       .       ?       
F2   K3   C21  132.84(6)    1_545   .       ?       
F22  K3   C21   42.93(5)    .       .       ?       
N3   K3   C21   44.97(6)    .       .       ?       
C25B K3   C21   64.2(2)     .       .       ?       
F16  K3   C21  140.79(5)    .       .       ?       
F36  K3   C21  119.11(5)    .       .       ?       
C13  K3   C21  118.19(7)    .       .       ?       
O3   K4   O1    85.87(5)    .       .       ?       
O3   K4   O4    85.85(5)    .       .       ?       
O1   K4   O4    85.84(5)    .       .       ?       
O3   K4   F5   143.57(5)    .       .       ?       
O1   K4   F5    59.04(4)    .       .       ?       
O4   K4   F5    99.86(5)    .       .       ?       
O3   K4   F35  141.68(5)    .       3_666   ?       
O1   K4   F35  121.73(5)    .       3_666   ?       
O4   K4   F35  119.36(5)    .       3_666   ?       
F5   K4   F35   65.00(4)    .       3_666   ?       
O3   K4   F33  139.30(5)    .       .       ?       
O1   K4   F33  108.72(5)    .       .       ?       
O4   K4   F33   58.72(4)    .       .       ?       
F5   K4   F33   68.53(5)    .       .       ?       
F35  K4   F33   61.30(4)    3_666   .       ?       
O3   K4   F3   101.98(5)    .       .       ?       
O1   K4   F3    55.82(4)    .       .       ?       
O4   K4   F3   139.56(5)    .       .       ?       
F5   K4   F3    51.74(5)    .       .       ?       
F35  K4   F3    77.92(5)    3_666   .       ?       
F33  K4   F3   117.80(5)    .       .       ?       
O3   K4   F33   98.25(5)    .       3_666   ?       
O1   K4   F33  169.61(4)    .       3_666   ?       
O4   K4   F33  103.91(4)    .       3_666   ?       
F5   K4   F33  114.80(4)    .       3_666   ?       
F35  K4   F33   50.32(4)    3_666   3_666   ?       
F33  K4   F33   74.26(5)    .       3_666   ?       
F3   K4   F33  113.85(4)    .       3_666   ?       
O3   K4   F26   54.98(4)    .       .       ?       
O1   K4   F26  105.06(5)    .       .       ?       
O4   K4   F26  137.42(5)    .       .       ?       
F5   K4   F26  121.27(5)    .       .       ?       
F35  K4   F26   90.04(4)    3_666   .       ?       
F33  K4   F26  143.84(4)    .       .       ?       
F3   K4   F26   72.13(5)    .       .       ?       
F33  K4   F26   70.26(4)    3_666   .       ?       
O3   K4   K3    42.11(4)    .       .       ?       
O1   K4   K3    88.19(3)    .       .       ?       
O4   K4   K3    44.02(3)    .       .       ?       
F5   K4   K3   135.37(4)    .       .       ?       
F35  K4   K3   147.39(4)    3_666   .       ?       
F33  K4   K3    99.08(3)    .       .       ?       
F3   K4   K3   134.06(3)    .       .       ?       
F33  K4   K3   101.28(3)    3_666   .       ?       
F26  K4   K3    94.46(3)    .       .       ?       
O3   K4   K1    86.26(4)    .       .       ?       
O1   K4   K1    41.94(3)    .       .       ?       
O4   K4   K1    43.97(3)    .       .       ?       
F5   K4   K1    74.28(3)    .       .       ?       
F35  K4   K1   132.05(4)    3_666   .       ?       
F33  K4   K1    81.36(3)    .       .       ?       
F3   K4   K1    96.45(3)    .       .       ?       
F33  K4   K1   147.42(3)    3_666   .       ?       
F26  K4   K1   134.03(3)    .       .       ?       
K3   K4   K1    61.311(12)  .       .       ?       
O3   K4   K2    43.93(4)    .       .       ?       
O1   K4   K2    42.22(3)    .       .       ?       
O4   K4   K2    88.19(3)    .       .       ?       
F5   K4   K2    99.96(3)    .       .       ?       
F35  K4   K2   149.63(4)    3_666   .       ?       
F33  K4   K2   140.40(3)    .       .       ?       
F3   K4   K2    72.37(3)    .       .       ?       
F33  K4   K2   140.00(3)    3_666   .       ?       
F26  K4   K2    75.16(3)    .       .       ?       
K3   K4   K2    61.704(12)  .       .       ?       
K1   K4   K2    59.095(12)  .       .       ?       
C1   O1   K1   118.82(14)   .       .       ?       
C1   O1   K2   127.67(13)   .       .       ?       
K1   O1   K2    94.43(5)    .       .       ?       
C1   O1   K4   119.82(13)   .       .       ?       
K1   O1   K4    94.07(5)    .       .       ?       
K2   O1   K4    94.29(5)    .       .       ?       
C7   N1   C4   111.8(2)     .       .       ?       
C7   N1   C5   113.2(2)     .       .       ?       
C4   N1   C5   112.1(2)     .       .       ?       
C7   N1   K1    88.70(13)   .       .       ?       
C4   N1   K1   108.06(13)   .       .       ?       
C5   N1   K1   120.81(16)   .       .       ?       
O1   C1   C3   109.69(19)   .       .       ?       
O1   C1   C2   107.8(2)     .       .       ?       
C3   C1   C2   108.3(2)     .       .       ?       
O1   C1   C4   114.88(19)   .       .       ?       
C3   C1   C4   109.1(2)     .       .       ?       
C2   C1   C4   106.92(19)   .       .       ?       
O1   C1   K1    41.16(10)   .       .       ?       
C3   C1   K1    88.21(14)   .       .       ?       
C2   C1   K1   148.92(17)   .       .       ?       
C4   C1   K1    91.38(13)   .       .       ?       
F1   C2   F3   106.3(2)     .       .       ?       
F1   C2   F2   106.0(2)     .       .       ?       
F3   C2   F2   106.0(2)     .       .       ?       
F1   C2   C1   110.49(19)   .       .       ?       
F3   C2   C1   112.9(2)     .       .       ?       
F2   C2   C1   114.5(2)     .       .       ?       
F6   C3   F4   106.3(2)     .       .       ?       
F6   C3   F5   105.5(2)     .       .       ?       
F4   C3   F5   106.0(2)     .       .       ?       
F6   C3   C1   111.5(2)     .       .       ?       
F4   C3   C1   114.5(2)     .       .       ?       
F5   C3   C1   112.4(2)     .       .       ?       
N1   C4   C1   112.86(19)   .       .       ?       
N1   C4   H4A  109.0        .       .       ?       
C1   C4   H4A  109.0        .       .       ?       
N1   C4   H4B  109.0        .       .       ?       
C1   C4   H4B  109.0        .       .       ?       
H4A  C4   H4B  107.8        .       .       ?       
N1   C5   C6   113.2(2)     .       .       ?       
N1   C5   H5A  108.9        .       .       ?       
C6   C5   H5A  108.9        .       .       ?       
N1   C5   H5B  108.9        .       .       ?       
C6   C5   H5B  108.9        .       .       ?       
H5A  C5   H5B  107.7        .       .       ?       
C5   C6   H6A  109.5        .       .       ?       
C5   C6   H6B  109.5        .       .       ?       
H6A  C6   H6B  109.5        .       .       ?       
C5   C6   H6C  109.5        .       .       ?       
H6A  C6   H6C  109.5        .       .       ?       
H6B  C6   H6C  109.5        .       .       ?       
N1   C7   C8   117.0(2)     .       .       ?       
N1   C7   K1    65.73(12)   .       .       ?       
C8   C7   K1   177.2(2)     .       .       ?       
N1   C7   H7A  108.1        .       .       ?       
C8   C7   H7A  108.1        .       .       ?       
K1   C7   H7A   71.3        .       .       ?       
N1   C7   H7B  108.1        .       .       ?       
C8   C7   H7B  108.1        .       .       ?       
K1   C7   H7B   69.8        .       .       ?       
H7A  C7   H7B  107.3        .       .       ?       
C7   C8   H8A  109.5        .       .       ?       
C7   C8   H8B  109.5        .       .       ?       
H8A  C8   H8B  109.5        .       .       ?       
C7   C8   H8C  109.5        .       .       ?       
H8A  C8   H8C  109.5        .       .       ?       
H8B  C8   H8C  109.5        .       .       ?       
C2   F1   K2   109.19(14)   .       .       ?       
C2   F2   K3   158.53(18)   .       1_565   ?       
C2   F3   K4   111.25(13)   .       .       ?       
C3   F5   K4   115.03(13)   .       .       ?       
C3   F6   K1   108.34(13)   .       .       ?       
C11  O2   K1   131.20(13)   .       .       ?       
C11  O2   K2   122.15(12)   .       .       ?       
K1   O2   K2    88.90(4)    .       .       ?       
C11  O2   K3   120.60(13)   .       .       ?       
K1   O2   K3    91.18(4)    .       .       ?       
K2   O2   K3    92.34(5)    .       .       ?       
C15B N2   C14  124.4(7)     .       .       ?       
C17A N2   C14  111.4(6)     .       .       ?       
C15B N2   C17B 106.8(8)     .       .       ?       
C14  N2   C17B 112.8(7)     .       .       ?       
C17A N2   C15A 108.4(6)     .       .       ?       
C14  N2   C15A 107.5(3)     .       .       ?       
O2   C11  C12  109.08(18)   .       .       ?       
O2   C11  C13  108.92(18)   .       .       ?       
C12  C11  C13  108.2(2)     .       .       ?       
O2   C11  C14  109.57(18)   .       .       ?       
C12  C11  C14  110.60(19)   .       .       ?       
C13  C11  C14  110.43(19)   .       .       ?       
F13  C12  F11  106.6(2)     .       .       ?       
F13  C12  F12  104.6(2)     .       .       ?       
F11  C12  F12  106.7(2)     .       .       ?       
F13  C12  C11  112.8(2)     .       .       ?       
F11  C12  C11  115.8(2)     .       .       ?       
F12  C12  C11  109.6(2)     .       .       ?       
F13  C12  K2    65.01(15)   .       .       ?       
F11  C12  K2   159.20(19)   .       .       ?       
F12  C12  K2    60.41(13)   .       .       ?       
C11  C12  K2    84.80(13)   .       .       ?       
F16  C13  F14  106.8(2)     .       .       ?       
F16  C13  F15  105.6(2)     .       .       ?       
F14  C13  F15  106.0(2)     .       .       ?       
F16  C13  C11  110.0(2)     .       .       ?       
F14  C13  C11  116.0(2)     .       .       ?       
F15  C13  C11  111.9(2)     .       .       ?       
F16  C13  K3    73.70(13)   .       .       ?       
F14  C13  K3   155.35(17)   .       .       ?       
F15  C13  K3    52.13(11)   .       .       ?       
C11  C13  K3    85.76(12)   .       .       ?       
N2   C14  C11  120.6(2)     .       .       ?       
N2   C14  H14A 107.2        .       .       ?       
C11  C14  H14A 107.2        .       .       ?       
N2   C14  H14B 107.2        .       .       ?       
C11  C14  H14B 107.2        .       .       ?       
H14A C14  H14B 106.8        .       .       ?       
C16A C15A N2   109.8(5)     .       .       ?       
C16A C15A H15A 109.7        .       .       ?       
N2   C15A H15A 109.7        .       .       ?       
C16A C15A H15B 109.7        .       .       ?       
N2   C15A H15B 109.7        .       .       ?       
H15A C15A H15B 108.2        .       .       ?       
C15A C16A H16A 109.5        .       .       ?       
C15A C16A H16B 109.5        .       .       ?       
H16A C16A H16B 109.5        .       .       ?       
C15A C16A H16C 109.5        .       .       ?       
H16A C16A H16C 109.5        .       .       ?       
H16B C16A H16C 109.5        .       .       ?       
N2   C15B C16B 110.9(10)    .       .       ?       
N2   C15B H15C 109.5        .       .       ?       
C16B C15B H15C 109.5        .       .       ?       
N2   C15B H15D 109.5        .       .       ?       
C16B C15B H15D 109.5        .       .       ?       
H15C C15B H15D 108.0        .       .       ?       
C15B C16B H16D 109.5        .       .       ?       
C15B C16B H16E 109.5        .       .       ?       
H16D C16B H16E 109.5        .       .       ?       
C15B C16B H16F 109.5        .       .       ?       
H16D C16B H16F 109.5        .       .       ?       
H16E C16B H16F 109.5        .       .       ?       
C18A C17A N2   113.2(9)     .       .       ?       
C18A C17A H17A 108.9        .       .       ?       
N2   C17A H17A 108.9        .       .       ?       
C18A C17A H17B 108.9        .       .       ?       
N2   C17A H17B 108.9        .       .       ?       
H17A C17A H17B 107.8        .       .       ?       
C17A C18A H18A 109.5        .       .       ?       
C17A C18A H18B 109.5        .       .       ?       
H18A C18A H18B 109.5        .       .       ?       
C17A C18A H18C 109.5        .       .       ?       
H18A C18A H18C 109.5        .       .       ?       
H18B C18A H18C 109.5        .       .       ?       
N2   C17B C18B 110.2(12)    .       .       ?       
N2   C17B H17C 109.6        .       .       ?       
C18B C17B H17C 109.6        .       .       ?       
N2   C17B H17D 109.6        .       .       ?       
C18B C17B H17D 109.6        .       .       ?       
H17C C17B H17D 108.1        .       .       ?       
C17B C18B H18D 109.5        .       .       ?       
C17B C18B H18E 109.5        .       .       ?       
H18D C18B H18E 109.5        .       .       ?       
C17B C18B H18F 109.5        .       .       ?       
H18D C18B H18F 109.5        .       .       ?       
H18E C18B H18F 109.5        .       .       ?       
C12  F11  K2   147.0(2)     .       2_546   ?       
C12  F12  K2    96.72(14)   .       .       ?       
C12  F13  K2    92.30(17)   .       .       ?       
C13  F15  K3   105.56(14)   .       .       ?       
C13  F16  K3    83.58(14)   .       .       ?       
C21  O3   K3   118.55(14)   .       .       ?       
C21  O3   K4   130.71(13)   .       .       ?       
K3   O3   K4    95.68(5)    .       .       ?       
C21  O3   K2   113.55(13)   .       .       ?       
K3   O3   K2    96.94(5)    .       .       ?       
K4   O3   K2    94.46(5)    .       .       ?       
C25B N3   C24  124.1(6)     .       .       ?       
C25B N3   C27B 110.1(6)     .       .       ?       
C24  N3   C27B 112.6(3)     .       .       ?       
C24  N3   C27A 112.6(3)     .       .       ?       
C24  N3   C25A 105.1(3)     .       .       ?       
C27A N3   C25A 112.9(4)     .       .       ?       
C25B N3   K3    83.7(5)     .       .       ?       
C24  N3   K3   104.73(14)   .       .       ?       
C27B N3   K3   119.05(19)   .       .       ?       
C27A N3   K3   119.05(19)   .       .       ?       
C25A N3   K3   101.0(3)     .       .       ?       
O3   C21  C23  107.9(2)     .       .       ?       
O3   C21  C22  109.07(18)   .       .       ?       
C23  C21  C22  109.2(2)     .       .       ?       
O3   C21  C24  114.5(2)     .       .       ?       
C23  C21  C24  106.70(19)   .       .       ?       
C22  C21  C24  109.3(2)     .       .       ?       
O3   C21  K3    41.34(10)   .       .       ?       
C23  C21  K3   149.21(17)   .       .       ?       
C22  C21  K3    87.37(13)   .       .       ?       
C24  C21  K3    90.99(14)   .       .       ?       
O3   C21  K2    45.63(10)   .       .       ?       
C23  C21  K2    87.65(14)   .       .       ?       
C22  C21  K2    78.45(13)   .       .       ?       
C24  C21  K2   159.46(16)   .       .       ?       
K3   C21  K2    69.99(4)    .       .       ?       
F22  C22  F21  107.2(2)     .       .       ?       
F22  C22  F23  105.28(19)   .       .       ?       
F21  C22  F23  105.7(2)     .       .       ?       
F22  C22  C21  111.3(2)     .       .       ?       
F21  C22  C21  114.69(19)   .       .       ?       
F23  C22  C21  112.1(2)     .       .       ?       
F22  C22  K2    93.69(13)   .       .       ?       
F21  C22  K2   149.53(18)   .       .       ?       
F23  C22  K2    46.05(11)   .       .       ?       
C21  C22  K2    75.95(13)   .       .       ?       
F25  C23  F26  105.5(2)     .       .       ?       
F25  C23  F24  106.2(2)     .       .       ?       
F26  C23  F24  106.2(2)     .       .       ?       
F25  C23  C21  113.0(2)     .       .       ?       
F26  C23  C21  110.0(2)     .       .       ?       
F24  C23  C21  115.1(2)     .       .       ?       
N3   C24  C21  114.3(2)     .       .       ?       
N3   C24  H24A 108.7        .       .       ?       
C21  C24  H24A 108.7        .       .       ?       
N3   C24  H24B 108.7        .       .       ?       
C21  C24  H24B 108.7        .       .       ?       
H24A C24  H24B 107.6        .       .       ?       
C26A C25A N3   112.2(4)     .       .       ?       
C26A C25A H25A 109.2        .       .       ?       
N3   C25A H25A 109.2        .       .       ?       
C26A C25A H25B 109.2        .       .       ?       
N3   C25A H25B 109.2        .       .       ?       
H25A C25A H25B 107.9        .       .       ?       
C25A C26A H26A 109.5        .       .       ?       
C25A C26A H26B 109.5        .       .       ?       
H26A C26A H26B 109.5        .       .       ?       
C25A C26A H26C 109.5        .       .       ?       
H26A C26A H26C 109.5        .       .       ?       
H26B C26A H26C 109.5        .       .       ?       
N3   C25B C26B 113.4(9)     .       .       ?       
N3   C25B K3    72.3(5)     .       .       ?       
C26B C25B K3   171.1(8)     .       .       ?       
N3   C25B H25C 108.9        .       .       ?       
C26B C25B H25C 108.9        .       .       ?       
K3   C25B H25C  74.4        .       .       ?       
N3   C25B H25D 108.9        .       .       ?       
C26B C25B H25D 108.9        .       .       ?       
K3   C25B H25D  62.2        .       .       ?       
H25C C25B H25D 107.7        .       .       ?       
C25B C26B H26D 109.5        .       .       ?       
C25B C26B H26E 109.5        .       .       ?       
H26D C26B H26E 109.5        .       .       ?       
C25B C26B H26F 109.5        .       .       ?       
H26D C26B H26F 109.5        .       .       ?       
H26E C26B H26F 109.5        .       .       ?       
C28A C27A N3   126.7(5)     .       .       ?       
C28A C27A H27A 105.6        .       .       ?       
N3   C27A H27A 105.6        .       .       ?       
C28A C27A H27B 105.6        .       .       ?       
N3   C27A H27B 105.6        .       .       ?       
H27A C27A H27B 106.1        .       .       ?       
C27A C28A H28A 109.5        .       .       ?       
C27A C28A H28B 109.5        .       .       ?       
H28A C28A H28B 109.5        .       .       ?       
C27A C28A H28C 109.5        .       .       ?       
H28A C28A H28C 109.5        .       .       ?       
H28B C28A H28C 109.5        .       .       ?       
C28B C27B N3   120.8(4)     .       .       ?       
C28B C27B H27C 107.1        .       .       ?       
N3   C27B H27C 107.1        .       .       ?       
C28B C27B H27D 107.1        .       .       ?       
N3   C27B H27D 107.1        .       .       ?       
H27C C27B H27D 106.8        .       .       ?       
C27B C28B H28D 109.5        .       .       ?       
C27B C28B H28E 109.5        .       .       ?       
H28D C28B H28E 109.5        .       .       ?       
C27B C28B H28F 109.5        .       .       ?       
H28D C28B H28F 109.5        .       .       ?       
H28E C28B H28F 109.5        .       .       ?       
C22  F22  K3   113.85(14)   .       .       ?       
C22  F23  K2   113.21(13)   .       .       ?       
C23  F25  K2   113.84(14)   .       .       ?       
C23  F26  K4   106.49(14)   .       .       ?       
C31  O4   K3   131.20(14)   .       .       ?       
C31  O4   K1   115.88(13)   .       .       ?       
K3   O4   K1    94.44(5)    .       .       ?       
C31  O4   K4   123.39(12)   .       .       ?       
K3   O4   K4    90.89(5)    .       .       ?       
K1   O4   K4    91.23(5)    .       .       ?       
C34  N4   C35  112.99(19)   .       .       ?       
C34  N4   C37  112.71(19)   .       .       ?       
C35  N4   C37  112.95(19)   .       .       ?       
C34  N4   K1   108.17(13)   .       .       ?       
C35  N4   K1   122.62(15)   .       .       ?       
C37  N4   K1    84.29(12)   .       .       ?       
O4   C31  C32  109.38(18)   .       .       ?       
O4   C31  C33  109.3(2)     .       .       ?       
C32  C31  C33  107.56(18)   .       .       ?       
O4   C31  C34  114.39(17)   .       .       ?       
C32  C31  C34  110.37(19)   .       .       ?       
C33  C31  C34  105.53(18)   .       .       ?       
O4   C31  K1    43.76(10)   .       .       ?       
C32  C31  K1    91.76(13)   .       .       ?       
C33  C31  K1   152.13(16)   .       .       ?       
C34  C31  K1    85.39(12)   .       .       ?       
F32  C32  F31  106.4(2)     .       .       ?       
F32  C32  F33  105.82(19)   .       .       ?       
F31  C32  F33  105.67(18)   .       .       ?       
F32  C32  C31  111.26(18)   .       .       ?       
F31  C32  C31  114.94(19)   .       .       ?       
F33  C32  C31  112.1(2)     .       .       ?       
F34  C33  F36  106.9(2)     .       .       ?       
F34  C33  F35  105.6(2)     .       .       ?       
F36  C33  F35  105.4(2)     .       .       ?       
F34  C33  C31  114.8(2)     .       .       ?       
F36  C33  C31  110.63(19)   .       .       ?       
F35  C33  C31  113.0(2)     .       .       ?       
N4   C34  C31  113.13(18)   .       .       ?       
N4   C34  H34A 109.0        .       .       ?       
C31  C34  H34A 109.0        .       .       ?       
N4   C34  H34B 109.0        .       .       ?       
C31  C34  H34B 109.0        .       .       ?       
H34A C34  H34B 107.8        .       .       ?       
N4   C35  C36  112.3(2)     .       .       ?       
N4   C35  H35A 109.1        .       .       ?       
C36  C35  H35A 109.1        .       .       ?       
N4   C35  H35B 109.1        .       .       ?       
C36  C35  H35B 109.1        .       .       ?       
H35A C35  H35B 107.9        .       .       ?       
C35  C36  H36A 109.5        .       .       ?       
C35  C36  H36B 109.5        .       .       ?       
H36A C36  H36B 109.5        .       .       ?       
C35  C36  H36C 109.5        .       .       ?       
H36A C36  H36C 109.5        .       .       ?       
H36B C36  H36C 109.5        .       .       ?       
N4   C37  C38  117.2(2)     .       .       ?       
N4   C37  K1    68.27(11)   .       .       ?       
C38  C37  K1   173.48(18)   .       .       ?       
N4   C37  H37A 108.0        .       .       ?       
C38  C37  H37A 108.0        .       .       ?       
K1   C37  H37A  66.0        .       .       ?       
N4   C37  H37B 108.0        .       .       ?       
C38  C37  H37B 108.0        .       .       ?       
K1   C37  H37B  72.4        .       .       ?       
H37A C37  H37B 107.2        .       .       ?       
C37  C38  H38A 109.5        .       .       ?       
C37  C38  H38B 109.5        .       .       ?       
H38A C38  H38B 109.5        .       .       ?       
C37  C38  H38C 109.5        .       .       ?       
H38A C38  H38C 109.5        .       .       ?       
H38B C38  H38C 109.5        .       .       ?       
C32  F32  K1   112.91(13)   .       .       ?       
C32  F33  K4   106.67(12)   .       .       ?       
C32  F33  K4   129.60(13)   .       3_666   ?       
K4   F33  K4   105.74(5)    .       3_666   ?       
C33  F35  K4   123.76(15)   .       3_666   ?       
C33  F36  K3   104.05(14)   .       .       ?       

loop_
    _geom_torsion_atom_site_label_1
    _geom_torsion_atom_site_label_2
    _geom_torsion_atom_site_label_3
    _geom_torsion_atom_site_label_4
    _geom_torsion
    _geom_torsion_site_symmetry_1
    _geom_torsion_site_symmetry_2
    _geom_torsion_site_symmetry_3
    _geom_torsion_site_symmetry_4
    _geom_torsion_publ_flag
K1   O1   C1   C3     62.6(2)     .       .       .       .       ?       
K2   O1   C1   C3   -174.96(14)   .       .       .       .       ?       
K4   O1   C1   C3    -51.5(2)     .       .       .       .       ?       
K1   O1   C1   C2   -179.70(13)   .       .       .       .       ?       
K2   O1   C1   C2    -57.3(2)     .       .       .       .       ?       
K4   O1   C1   C2     66.2(2)     .       .       .       .       ?       
K1   O1   C1   C4    -60.7(2)     .       .       .       .       ?       
K2   O1   C1   C4     61.8(3)     .       .       .       .       ?       
K4   O1   C1   C4   -174.79(15)   .       .       .       .       ?       
K2   O1   C1   K1    122.41(19)   .       .       .       .       ?       
K4   O1   C1   K1   -114.13(16)   .       .       .       .       ?       
O1   C1   C2   F1     60.8(3)     .       .       .       .       ?       
C3   C1   C2   F1    179.4(2)     .       .       .       .       ?       
C4   C1   C2   F1    -63.2(3)     .       .       .       .       ?       
K1   C1   C2   F1     60.4(4)     .       .       .       .       ?       
O1   C1   C2   F3    -58.1(3)     .       .       .       .       ?       
C3   C1   C2   F3     60.5(3)     .       .       .       .       ?       
C4   C1   C2   F3    177.9(2)     .       .       .       .       ?       
K1   C1   C2   F3    -58.5(4)     .       .       .       .       ?       
O1   C1   C2   F2   -179.57(19)   .       .       .       .       ?       
C3   C1   C2   F2    -61.0(3)     .       .       .       .       ?       
C4   C1   C2   F2     56.4(3)     .       .       .       .       ?       
K1   C1   C2   F2   -179.95(19)   .       .       .       .       ?       
O1   C1   C3   F6    -63.6(3)     .       .       .       .       ?       
C2   C1   C3   F6    179.1(2)     .       .       .       .       ?       
C4   C1   C3   F6     63.1(2)     .       .       .       .       ?       
K1   C1   C3   F6    -27.78(18)   .       .       .       .       ?       
O1   C1   C3   F4    175.6(2)     .       .       .       .       ?       
C2   C1   C3   F4     58.3(3)     .       .       .       .       ?       
C4   C1   C3   F4    -57.8(3)     .       .       .       .       ?       
K1   C1   C3   F4   -148.6(2)     .       .       .       .       ?       
O1   C1   C3   F5     54.6(3)     .       .       .       .       ?       
C2   C1   C3   F5    -62.7(3)     .       .       .       .       ?       
C4   C1   C3   F5   -178.72(19)   .       .       .       .       ?       
K1   C1   C3   F5     90.43(19)   .       .       .       .       ?       
C7   N1   C4   C1   -113.3(2)     .       .       .       .       ?       
C5   N1   C4   C1    118.3(2)     .       .       .       .       ?       
K1   N1   C4   C1    -17.3(2)     .       .       .       .       ?       
O1   C1   C4   N1     49.7(3)     .       .       .       .       ?       
C3   C1   C4   N1    -73.9(3)     .       .       .       .       ?       
C2   C1   C4   N1    169.2(2)     .       .       .       .       ?       
K1   C1   C4   N1     14.7(2)     .       .       .       .       ?       
C7   N1   C5   C6     59.9(3)     .       .       .       .       ?       
C4   N1   C5   C6   -172.4(2)     .       .       .       .       ?       
K1   N1   C5   C6    -43.2(3)     .       .       .       .       ?       
C4   N1   C7   C8    -70.0(3)     .       .       .       .       ?       
C5   N1   C7   C8     57.8(3)     .       .       .       .       ?       
K1   N1   C7   C8   -179.0(2)     .       .       .       .       ?       
C4   N1   C7   K1    108.97(17)   .       .       .       .       ?       
C5   N1   C7   K1   -123.2(2)     .       .       .       .       ?       
F3   C2   F1   K2     84.04(18)   .       .       .       .       ?       
F2   C2   F1   K2   -163.42(15)   .       .       .       .       ?       
C1   C2   F1   K2    -38.8(2)     .       .       .       .       ?       
F1   C2   F2   K3    -36.9(5)     .       .       .       1_565   ?       
F3   C2   F2   K3     75.8(5)     .       .       .       1_565   ?       
C1   C2   F2   K3   -159.0(3)     .       .       .       1_565   ?       
F1   C2   F3   K4    -95.37(18)   .       .       .       .       ?       
F2   C2   F3   K4    152.11(16)   .       .       .       .       ?       
C1   C2   F3   K4     25.9(3)     .       .       .       .       ?       
F6   C3   F5   K4     89.53(19)   .       .       .       .       ?       
F4   C3   F5   K4   -157.96(15)   .       .       .       .       ?       
C1   C3   F5   K4    -32.2(2)     .       .       .       .       ?       
F4   C3   F6   K1    158.70(15)   .       .       .       .       ?       
F5   C3   F6   K1    -89.05(17)   .       .       .       .       ?       
C1   C3   F6   K1     33.2(2)     .       .       .       .       ?       
K1   O2   C11  C12   132.33(18)   .       .       .       .       ?       
K2   O2   C11  C12    11.0(2)     .       .       .       .       ?       
K3   O2   C11  C12  -104.33(19)   .       .       .       .       ?       
K1   O2   C11  C13  -109.76(19)   .       .       .       .       ?       
K2   O2   C11  C13   128.90(17)   .       .       .       .       ?       
K3   O2   C11  C13    13.6(2)     .       .       .       .       ?       
K1   O2   C11  C14    11.1(2)     .       .       .       .       ?       
K2   O2   C11  C14  -110.21(17)   .       .       .       .       ?       
K3   O2   C11  C14   134.47(15)   .       .       .       .       ?       
O2   C11  C12  F13    52.7(3)     .       .       .       .       ?       
C13  C11  C12  F13   -65.6(3)     .       .       .       .       ?       
C14  C11  C12  F13   173.3(2)     .       .       .       .       ?       
O2   C11  C12  F11   175.8(2)     .       .       .       .       ?       
C13  C11  C12  F11    57.5(3)     .       .       .       .       ?       
C14  C11  C12  F11   -63.6(3)     .       .       .       .       ?       
O2   C11  C12  F12   -63.4(3)     .       .       .       .       ?       
C13  C11  C12  F12   178.2(2)     .       .       .       .       ?       
C14  C11  C12  F12    57.2(2)     .       .       .       .       ?       
O2   C11  C12  K2     -7.38(16)   .       .       .       .       ?       
C13  C11  C12  K2   -125.73(15)   .       .       .       .       ?       
C14  C11  C12  K2    113.19(15)   .       .       .       .       ?       
O2   C11  C13  F16    61.5(3)     .       .       .       .       ?       
C12  C11  C13  F16   179.99(19)   .       .       .       .       ?       
C14  C11  C13  F16   -58.8(2)     .       .       .       .       ?       
O2   C11  C13  F14  -177.2(2)     .       .       .       .       ?       
C12  C11  C13  F14   -58.8(3)     .       .       .       .       ?       
C14  C11  C13  F14    62.4(3)     .       .       .       .       ?       
O2   C11  C13  F15   -55.5(3)     .       .       .       .       ?       
C12  C11  C13  F15    63.0(3)     .       .       .       .       ?       
C14  C11  C13  F15  -175.9(2)     .       .       .       .       ?       
O2   C11  C13  K3     -9.41(16)   .       .       .       .       ?       
C12  C11  C13  K3    109.05(15)   .       .       .       .       ?       
C14  C11  C13  K3   -129.77(15)   .       .       .       .       ?       
C15B N2   C14  C11   127.2(7)     .       .       .       .       ?       
C17A N2   C14  C11  -134.3(6)     .       .       .       .       ?       
C17B N2   C14  C11  -101.0(7)     .       .       .       .       ?       
C15A N2   C14  C11   107.1(3)     .       .       .       .       ?       
O2   C11  C14  N2   -179.5(2)     .       .       .       .       ?       
C12  C11  C14  N2     60.2(3)     .       .       .       .       ?       
C13  C11  C14  N2    -59.5(3)     .       .       .       .       ?       
C17A N2   C15A C16A   76.8(7)     .       .       .       .       ?       
C14  N2   C15A C16A -162.7(4)     .       .       .       .       ?       
C14  N2   C15B C16B  -77.5(13)    .       .       .       .       ?       
C17B N2   C15B C16B  148.3(12)    .       .       .       .       ?       
C14  N2   C17A C18A   86.6(11)    .       .       .       .       ?       
C15A N2   C17A C18A -155.4(9)     .       .       .       .       ?       
C15B N2   C17B C18B   57.8(14)    .       .       .       .       ?       
C14  N2   C17B C18B  -82.3(12)    .       .       .       .       ?       
F13  C12  F11  K2     40.7(4)     .       .       .       2_546   ?       
F12  C12  F11  K2    152.1(2)     .       .       .       2_546   ?       
C11  C12  F11  K2    -85.7(3)     .       .       .       2_546   ?       
K2   C12  F11  K2    103.4(6)     .       .       .       2_546   ?       
F13  C12  F12  K2    -49.43(18)   .       .       .       .       ?       
F11  C12  F12  K2   -162.14(17)   .       .       .       .       ?       
C11  C12  F12  K2     71.78(18)   .       .       .       .       ?       
F11  C12  F13  K2    159.6(2)     .       .       .       .       ?       
F12  C12  F13  K2     46.78(18)   .       .       .       .       ?       
C11  C12  F13  K2    -72.3(2)     .       .       .       .       ?       
F16  C13  F15  K3    -54.1(2)     .       .       .       .       ?       
F14  C13  F15  K3   -167.15(18)   .       .       .       .       ?       
C11  C13  F15  K3     65.5(2)     .       .       .       .       ?       
F14  C13  F16  K3    154.27(18)   .       .       .       .       ?       
F15  C13  F16  K3     41.81(16)   .       .       .       .       ?       
C11  C13  F16  K3    -79.14(17)   .       .       .       .       ?       
K3   O3   C21  C23  -179.28(13)   .       .       .       .       ?       
K4   O3   C21  C23   -51.2(2)     .       .       .       .       ?       
K2   O3   C21  C23    67.93(19)   .       .       .       .       ?       
K3   O3   C21  C22    62.2(2)     .       .       .       .       ?       
K4   O3   C21  C22  -169.74(15)   .       .       .       .       ?       
K2   O3   C21  C22   -50.6(2)     .       .       .       .       ?       
K3   O3   C21  C24   -60.7(2)     .       .       .       .       ?       
K4   O3   C21  C24    67.4(3)     .       .       .       .       ?       
K2   O3   C21  C24  -173.44(15)   .       .       .       .       ?       
K4   O3   C21  K3    128.1(2)     .       .       .       .       ?       
K2   O3   C21  K3   -112.79(14)   .       .       .       .       ?       
K3   O3   C21  K2    112.79(14)   .       .       .       .       ?       
K4   O3   C21  K2   -119.13(19)   .       .       .       .       ?       
O3   C21  C22  F22   -54.2(3)     .       .       .       .       ?       
C23  C21  C22  F22  -171.8(2)     .       .       .       .       ?       
C24  C21  C22  F22    71.8(2)     .       .       .       .       ?       
K3   C21  C22  F22   -18.37(18)   .       .       .       .       ?       
K2   C21  C22  F22   -88.48(17)   .       .       .       .       ?       
O3   C21  C22  F21  -176.0(2)     .       .       .       .       ?       
C23  C21  C22  F21    66.3(3)     .       .       .       .       ?       
C24  C21  C22  F21   -50.1(3)     .       .       .       .       ?       
K3   C21  C22  F21  -140.3(2)     .       .       .       .       ?       
K2   C21  C22  F21   149.6(2)     .       .       .       .       ?       
O3   C21  C22  F23    63.5(3)     .       .       .       .       ?       
C23  C21  C22  F23   -54.2(3)     .       .       .       .       ?       
C24  C21  C22  F23  -170.6(2)     .       .       .       .       ?       
K3   C21  C22  F23    99.26(18)   .       .       .       .       ?       
K2   C21  C22  F23    29.15(17)   .       .       .       .       ?       
O3   C21  C22  K2     34.32(16)   .       .       .       .       ?       
C23  C21  C22  K2    -83.36(17)   .       .       .       .       ?       
C24  C21  C22  K2    160.24(18)   .       .       .       .       ?       
K3   C21  C22  K2     70.11(4)    .       .       .       .       ?       
O3   C21  C23  F25   -55.5(3)     .       .       .       .       ?       
C22  C21  C23  F25    62.9(3)     .       .       .       .       ?       
C24  C21  C23  F25  -179.1(2)     .       .       .       .       ?       
K3   C21  C23  F25   -56.5(4)     .       .       .       .       ?       
K2   C21  C23  F25   -14.0(2)     .       .       .       .       ?       
O3   C21  C23  F26    62.2(3)     .       .       .       .       ?       
C22  C21  C23  F26  -179.4(2)     .       .       .       .       ?       
C24  C21  C23  F26   -61.4(3)     .       .       .       .       ?       
K3   C21  C23  F26    61.2(4)     .       .       .       .       ?       
K2   C21  C23  F26   103.7(2)     .       .       .       .       ?       
O3   C21  C23  F24  -177.9(2)     .       .       .       .       ?       
C22  C21  C23  F24   -59.5(3)     .       .       .       .       ?       
C24  C21  C23  F24    58.6(3)     .       .       .       .       ?       
K3   C21  C23  F24  -178.8(2)     .       .       .       .       ?       
K2   C21  C23  F24  -136.4(2)     .       .       .       .       ?       
C25B N3   C24  C21  -116.0(6)     .       .       .       .       ?       
C27B N3   C24  C21   107.1(3)     .       .       .       .       ?       
C27A N3   C24  C21   107.1(3)     .       .       .       .       ?       
C25A N3   C24  C21  -129.6(4)     .       .       .       .       ?       
K3   N3   C24  C21   -23.7(2)     .       .       .       .       ?       
O3   C21  C24  N3     56.1(3)     .       .       .       .       ?       
C23  C21  C24  N3    175.4(2)     .       .       .       .       ?       
C22  C21  C24  N3    -66.6(3)     .       .       .       .       ?       
K3   C21  C24  N3     20.9(2)     .       .       .       .       ?       
K2   C21  C24  N3     42.6(5)     .       .       .       .       ?       
C24  N3   C25A C26A  178.1(4)     .       .       .       .       ?       
C27A N3   C25A C26A  -58.8(6)     .       .       .       .       ?       
K3   N3   C25A C26A   69.4(5)     .       .       .       .       ?       
C24  N3   C25B C26B  -69.1(11)    .       .       .       .       ?       
C27B N3   C25B C26B   68.7(11)    .       .       .       .       ?       
K3   N3   C25B C26B -172.7(10)    .       .       .       .       ?       
C24  N3   C25B K3    103.5(4)     .       .       .       .       ?       
C27B N3   C25B K3   -118.7(3)     .       .       .       .       ?       
C24  N3   C27A C28A -165.6(6)     .       .       .       .       ?       
C25A N3   C27A C28A   75.5(7)     .       .       .       .       ?       
K3   N3   C27A C28A  -42.6(7)     .       .       .       .       ?       
C25B N3   C27B C28B  -67.9(7)     .       .       .       .       ?       
C24  N3   C27B C28B   75.0(5)     .       .       .       .       ?       
K3   N3   C27B C28B -161.9(4)     .       .       .       .       ?       
F21  C22  F22  K3    149.74(14)   .       .       .       .       ?       
F23  C22  F22  K3    -98.07(17)   .       .       .       .       ?       
C21  C22  F22  K3     23.6(2)     .       .       .       .       ?       
K2   C22  F22  K3    -52.76(11)   .       .       .       .       ?       
F22  C22  F23  K2     80.16(19)   .       .       .       .       ?       
F21  C22  F23  K2   -166.60(14)   .       .       .       .       ?       
C21  C22  F23  K2    -41.0(2)     .       .       .       .       ?       
F26  C23  F25  K2   -102.45(17)   .       .       .       .       ?       
F24  C23  F25  K2    145.06(15)   .       .       .       .       ?       
C21  C23  F25  K2     17.9(3)     .       .       .       .       ?       
F25  C23  F26  K4     77.72(18)   .       .       .       .       ?       
F24  C23  F26  K4   -169.76(17)   .       .       .       .       ?       
C21  C23  F26  K4    -44.5(2)     .       .       .       .       ?       
K3   O4   C31  C32   166.06(13)   .       .       .       .       ?       
K1   O4   C31  C32   -71.33(19)   .       .       .       .       ?       
K4   O4   C31  C32    39.1(2)     .       .       .       .       ?       
K3   O4   C31  C33    48.5(2)     .       .       .       .       ?       
K1   O4   C31  C33   171.13(13)   .       .       .       .       ?       
K4   O4   C31  C33   -78.5(2)     .       .       .       .       ?       
K3   O4   C31  C34   -69.6(2)     .       .       .       .       ?       
K1   O4   C31  C34    53.1(2)     .       .       .       .       ?       
K4   O4   C31  C34   163.44(14)   .       .       .       .       ?       
K3   O4   C31  K1   -122.61(18)   .       .       .       .       ?       
K4   O4   C31  K1    110.39(16)   .       .       .       .       ?       
O4   C31  C32  F32    54.8(2)     .       .       .       .       ?       
C33  C31  C32  F32   173.41(19)   .       .       .       .       ?       
C34  C31  C32  F32   -71.9(2)     .       .       .       .       ?       
K1   C31  C32  F32    13.79(18)   .       .       .       .       ?       
O4   C31  C32  F31   175.81(19)   .       .       .       .       ?       
C33  C31  C32  F31   -65.5(3)     .       .       .       .       ?       
C34  C31  C32  F31    49.1(3)     .       .       .       .       ?       
K1   C31  C32  F31   134.85(18)   .       .       .       .       ?       
O4   C31  C32  F33   -63.5(2)     .       .       .       .       ?       
C33  C31  C32  F33    55.1(2)     .       .       .       .       ?       
C34  C31  C32  F33   169.79(17)   .       .       .       .       ?       
K1   C31  C32  F33  -104.47(16)   .       .       .       .       ?       
O4   C31  C33  F34   174.3(2)     .       .       .       .       ?       
C32  C31  C33  F34    55.7(3)     .       .       .       .       ?       
C34  C31  C33  F34   -62.2(3)     .       .       .       .       ?       
K1   C31  C33  F34  -172.5(2)     .       .       .       .       ?       
O4   C31  C33  F36   -64.6(2)     .       .       .       .       ?       
C32  C31  C33  F36   176.7(2)     .       .       .       .       ?       
C34  C31  C33  F36    58.9(3)     .       .       .       .       ?       
K1   C31  C33  F36   -51.4(4)     .       .       .       .       ?       
O4   C31  C33  F35    53.2(3)     .       .       .       .       ?       
C32  C31  C33  F35   -65.5(3)     .       .       .       .       ?       
C34  C31  C33  F35   176.7(2)     .       .       .       .       ?       
K1   C31  C33  F35    66.4(4)     .       .       .       .       ?       
C35  N4   C34  C31  -108.0(2)     .       .       .       .       ?       
C37  N4   C34  C31   122.5(2)     .       .       .       .       ?       
K1   N4   C34  C31    31.1(2)     .       .       .       .       ?       
O4   C31  C34  N4    -58.5(3)     .       .       .       .       ?       
C32  C31  C34  N4     65.3(2)     .       .       .       .       ?       
C33  C31  C34  N4   -178.76(19)   .       .       .       .       ?       
K1   C31  C34  N4    -24.86(17)   .       .       .       .       ?       
C34  N4   C35  C36   159.4(2)     .       .       .       .       ?       
C37  N4   C35  C36   -71.1(3)     .       .       .       .       ?       
K1   N4   C35  C36    27.1(3)     .       .       .       .       ?       
C34  N4   C37  C38    68.7(3)     .       .       .       .       ?       
C35  N4   C37  C38   -60.9(3)     .       .       .       .       ?       
K1   N4   C37  C38   176.1(2)     .       .       .       .       ?       
C34  N4   C37  K1   -107.34(16)   .       .       .       .       ?       
C35  N4   C37  K1    123.09(18)   .       .       .       .       ?       
F31  C32  F32  K1   -142.62(13)   .       .       .       .       ?       
F33  C32  F32  K1    105.28(15)   .       .       .       .       ?       
C31  C32  F32  K1    -16.7(2)     .       .       .       .       ?       
F32  C32  F33  K4    -69.60(18)   .       .       .       .       ?       
F31  C32  F33  K4    177.76(14)   .       .       .       .       ?       
C31  C32  F33  K4     51.85(19)   .       .       .       .       ?       
F32  C32  F33  K4    162.44(11)   .       .       .       3_666   ?       
F31  C32  F33  K4     49.8(3)     .       .       .       3_666   ?       
C31  C32  F33  K4    -76.1(2)     .       .       .       3_666   ?       
F34  C33  F35  K4    -29.5(3)     .       .       .       3_666   ?       
F36  C33  F35  K4   -142.41(14)   .       .       .       3_666   ?       
C31  C33  F35  K4     96.7(2)     .       .       .       3_666   ?       
F34  C33  F36  K3    172.75(15)   .       .       .       .       ?       
F35  C33  F36  K3    -75.24(17)   .       .       .       .       ?       
C31  C33  F36  K3     47.2(2)     .       .       .       .       ?       

#----------------------------------------------------------------------------#
#===END OF CIF FILE FOR SR681                                                #
#----------------------------------------------------------------------------#
